# Supplementary material for: Asymmetric hydrogenation of dibenzo-fused azepines with chiral cationic ruthenium diamine catalysts
Source: Royal Society of Chemistry journal article supplement (doi:10.1039/d3nj01652h), 2023-01-01
Supplement: d3nj01652h1.pdf [file d3nj01652h1.pdf]

Supporting Information for

**Asymmetric hydrogenation of dibenzo-fused azepines with  
chiral cationic ruthenium diamine catalysts**

Zi-Qi Yi,<sup>a,b</sup> Bo-Wen Deng,<sup>a,b</sup> Fei Chen,<sup>a,b\*</sup> Yan-Mei He<sup>a</sup> and Qing-Hua Fan<sup>a,b\*</sup>

<sup>a</sup>Beijing National Laboratory for Molecular Sciences, CAS Key Laboratory of Molecular Recognition and Function, Institute of Chemistry, Chinese Academy of Sciences (CAS).

<sup>b</sup>University of Chinese Academy of Sciences, Beijing 100190, P. R. China

E-mail: *chenfei211@iccas.ac.cn; fanqh@iccas.ac.cn*

**Contents**

|                                                                                          |      |
|------------------------------------------------------------------------------------------|------|
| 1. General information -----                                                             | S2   |
| 2. Optimization of conditions for asymmetric hydrogenation -----                         | S2   |
| 3. General procedure for the synthesis of dibenzo-fused azepines -----                   | S6   |
| 4. General procedure for the asymmetric hydrogenation of dibenzo-fused azepines<br>----- | S19  |
| 5. References-----                                                                       | S37  |
| 6. Copy of NMR spectra -----                                                             | S38  |
| 7. Copy of HPLC spectra -----                                                            | S112 |

## 1. General information

Unless otherwise noted, all experiments were carried out under an atmosphere of nitrogen using standard Schlenk techniques or in a nitrogen-filled glovebox.  $^1\text{H}$  NMR and  $^{13}\text{C}$  NMR spectra were recorded on a Bruker Model Avance DMX 300 Spectrometer ( $^1\text{H}$  300 MHz and  $^{13}\text{C}$  75 MHz, respectively) or Bruker Model Avance DMX 400 Spectrometer ( $^1\text{H}$  400 MHz and  $^{13}\text{C}$  100 MHz, respectively) or Bruker Model Avance DMX 500 Spectrometer ( $^1\text{H}$  500 MHz and  $^{13}\text{C}$  125 MHz, respectively). Chemical shifts ( $\delta$ ) were given in ppm and were referenced to residual solvent or TMS peaks. Optical rotations were measured with Rudolph Autopl VI polarimeter. High resolution MS (P-ESI HRMS) were obtained on Bruker Apex IV FTMS spectrometer or Thermo Fisher Q Exactive Mass Spectrometer. HPLC analyses were performed on an Agilent 1260 liquid chromatograph. All organic solvents were dried using standard, published methods and were distilled before use. All other chemicals were used as received from Aldrich or Acros without further purification. The catalysts were prepared according to the published methods.<sup>1</sup> Seven-membered cyclic imines were synthesized according to modified literature methods.<sup>2-4</sup>

## 2. Optimization of conditions for asymmetric hydrogenation

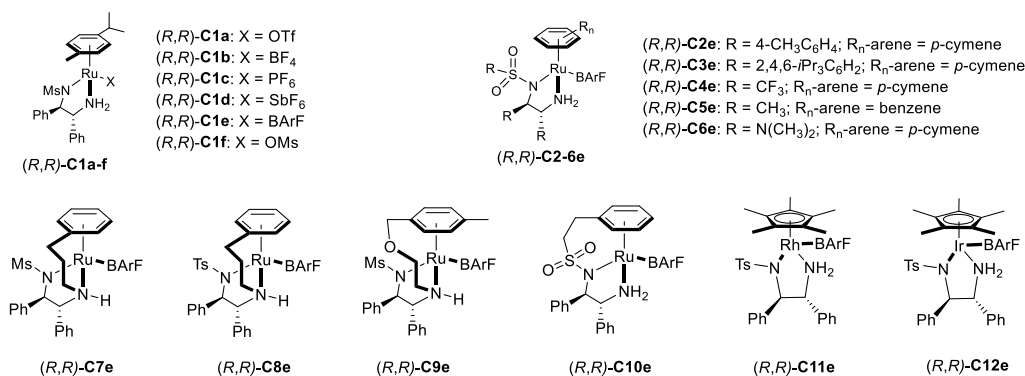

**Figure S1.** Chiral ruthenium diamine catalysts used in this study

**Table S1:** Optimization of conditions for asymmetric hydrogenation of **1a**<sup>a</sup>

| Entry                 | Solvent           | H <sub>2</sub> (atm);<br>Temp. (°C) | Conv. (%) <sup>b</sup> | ee (%) <sup>c</sup> |
|-----------------------|-------------------|-------------------------------------|------------------------|---------------------|
| 1                     | MeOH              | 50; 40                              | >99                    | 91                  |
| 2                     | EtOH              | 50; 40                              | >99                    | 93                  |
| 3                     | <i>i</i> -PrOH    | 50; 40                              | >99                    | 96                  |
| 4                     | <i>n</i> -BuOH    | 50; 40                              | >99                    | 92                  |
| 5                     | <i>t</i> -BuOH    | 50; 40                              | >99                    | 96                  |
| 6                     | <i>t</i> -AmylOH  | 50; 40                              | >99                    | 92                  |
| 7                     | TFE               | 50; 40                              | 68                     | 97                  |
| 8                     | HFIP              | 50; 40                              | >99                    | 97                  |
| 9                     | acetone           | 50; 40                              | >99                    | 88                  |
| 10                    | 1,4-dioxane       | 50; 40                              | >99                    | 81                  |
| 11                    | THF               | 50; 40                              | >99                    | 84                  |
| 12                    | EA                | 50; 40                              | >99                    | 94                  |
| 13                    | CHCl <sub>3</sub> | 50; 40                              | >99                    | 96                  |
| 14                    | DCM               | 50; 40                              | >99                    | 96                  |
| 15                    | DCE               | 50; 40                              | >99                    | 96                  |
| 16                    | toluene           | 50; 40                              | >99                    | 84                  |
| 17                    | HFIP              | 50; 25                              | >99                    | 97                  |
| 18                    | HFIP              | 50; 70                              | >99                    | 97                  |
| 19                    | HFIP              | 80; 40                              | >99                    | 97                  |
| 20                    | HFIP              | 1; 40                               | 96                     | 97                  |
| <b>21<sup>d</sup></b> | <b>HFIP</b>       | <b>1; 40</b>                        | <b>&gt;99</b>          | <b>97</b>           |

<sup>a</sup>Reaction conditions: **1a** (0.1 mmol) in solvent (1.0 mL), (*R,R*)-**C1a** catalyst (1.0 mol%), reaction for 12 h. <sup>b</sup>The conversions were determined by <sup>1</sup>H NMR spectroscopy of the crude reaction mixture. <sup>c</sup>The enantiomeric excesses were determined by HPLC with a chiral AD-H column. <sup>d</sup>Reaction for 24 h. (TFE: Trifluoroethanol, HFIP: hexafluoroisopropanol).

**Table S2:** Optimization of conditions for asymmetric hydrogenation of **3a**<sup>a</sup>

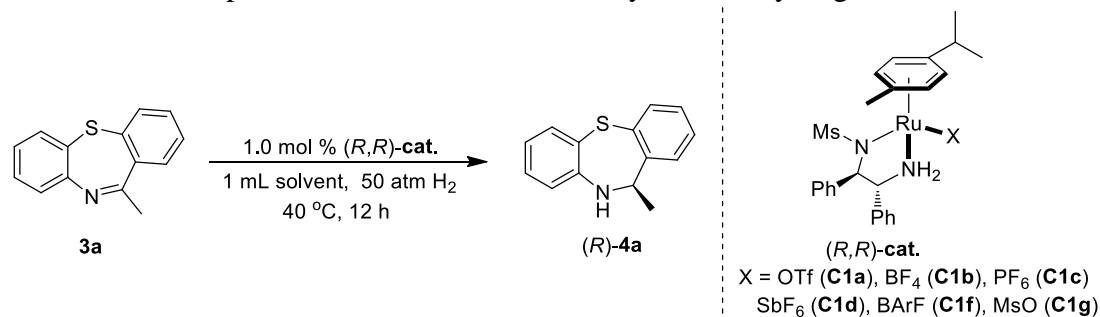

| Entry     | Solvent        | Catalyst                   | [X]              | Conv. (%) <sup>b</sup> | ee (%) <sup>c</sup> |
|-----------|----------------|----------------------------|------------------|------------------------|---------------------|
| 1         | HFIP           | ( <i>R,R</i> )- <b>C1a</b> | OTf              | 27                     | 65                  |
| 2         | MeOH           | ( <i>R,R</i> )- <b>C1a</b> | OTf              | 27                     | 82                  |
| 3         | EtOH           | ( <i>R,R</i> )- <b>C1a</b> | OTf              | 81                     | 90                  |
| 4         | <i>i</i> -PrOH | ( <i>R,R</i> )- <b>C1a</b> | OTf              | 97                     | 93                  |
| 5         | THF            | ( <i>R,R</i> )- <b>C1a</b> | OTf              | 31                     | 76                  |
| 6         | DCM            | ( <i>R,R</i> )- <b>C1a</b> | OTf              | 96                     | 89                  |
| 7         | DCM            | ( <i>R,R</i> )- <b>C1b</b> | BF <sub>4</sub>  | 28                     | 87                  |
| 8         | DCM            | ( <i>R,R</i> )- <b>C1c</b> | PF <sub>6</sub>  | 89                     | 93                  |
| 9         | DCM            | ( <i>R,R</i> )- <b>C1d</b> | SbF <sub>6</sub> | 80                     | 91                  |
| <b>10</b> | <b>DCM</b>     | <b>(<i>R,R</i>)-C1e</b>    | <b>BArF</b>      | <b>&gt;99</b>          | <b>99</b>           |
| 11        | DCM            | ( <i>R,R</i> )- <b>C1f</b> | OMs              | 32                     | 71                  |

<sup>a</sup>Reaction conditions: **3a** (0.1 mmol) in solvent (1 mL), (*R,R*)-**cat.** (1.0 mol%), H<sub>2</sub> (50 atm), stirred at 40 °C for 12 h. <sup>b</sup>The conversions were determined by <sup>1</sup>H NMR spectroscopy of the crude reaction mixture. <sup>c</sup>The enantiomeric excesses were determined by HPLC with a chiral AD-H column.

**Table S3:** Optimization of conditions for asymmetric hydrogenation of **5a**<sup>a</sup>

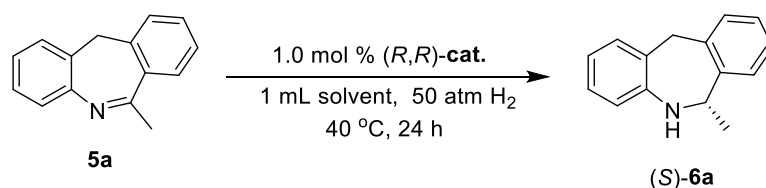

| Entry     | Solvent    | Catalyst                    | [X] <sup>-</sup>              | Conv. (%) <sup>b</sup> | ee (%) <sup>c</sup> |
|-----------|------------|-----------------------------|-------------------------------|------------------------|---------------------|
| 1         | HFIP       | ( <i>R,R</i> )- <b>C1a</b>  | OTf                           | >99                    | 12                  |
| 2         | DCM        | ( <i>R,R</i> )- <b>C1e</b>  | BArF                          | >99                    | 78                  |
| 3         | DCM        | ( <i>R,R</i> )- <b>C1a</b>  | OTf                           | >99                    | 72                  |
| 4         | DCM        | ( <i>R,R</i> )- <b>C1b</b>  | BF <sub>4</sub> <sup>-</sup>  | >99                    | 70                  |
| 5         | DCM        | ( <i>R,R</i> )- <b>C1c</b>  | PF <sub>6</sub> <sup>-</sup>  | >99                    | 70                  |
| 6         | DCM        | ( <i>R,R</i> )- <b>C1d</b>  | SbF <sub>6</sub> <sup>-</sup> | >99                    | 67                  |
| 7         | DCM        | ( <i>R,R</i> )- <b>C1f</b>  | OMs                           | >99                    | 5                   |
| 8         | DCM        | ( <i>R,R</i> )- <b>C2e</b>  | BArF                          | >99                    | 48                  |
| 9         | DCM        | ( <i>R,R</i> )- <b>C3e</b>  | BArF                          | >99                    | 21                  |
| 10        | DCM        | ( <i>R,R</i> )- <b>C4e</b>  | BArF                          | >99                    | 17                  |
| 11        | DCM        | ( <i>R,R</i> )- <b>C5e</b>  | BArF                          | >99                    | 53                  |
| 12        | DCM        | ( <i>R,R</i> )- <b>C6e</b>  | BArF                          | 73                     | 26                  |
| 13        | DCM        | ( <i>R,R</i> )- <b>C7e</b>  | BArF                          | >99                    | 83                  |
| <b>14</b> | <b>DCM</b> | <b>(<i>R,R</i>)-C8e</b>     | <b>BArF</b>                   | <b>&gt;99</b>          | <b>87</b>           |
| 15        | DCM        | ( <i>R,R</i> )- <b>C9e</b>  | BArF                          | >99                    | 2                   |
| 16        | DCM        | ( <i>R,R</i> )- <b>C10e</b> | BArF                          | >99                    | 20                  |
| 17        | DCM        | ( <i>R,R</i> )- <b>C11e</b> | BArF                          | >99                    | 65                  |
| 18        | DCM        | ( <i>R,R</i> )- <b>C12e</b> | BArF                          | >99                    | 37                  |

<sup>a</sup>Reaction conditions: **5a** (0.1 mmol) in solvent (1 mL), (*R,R*)-**cat.** (1.0 mol%), H<sub>2</sub> (50 atm), stirred at 40 °C for 12 h. <sup>b</sup>The conversions were determined by <sup>1</sup>H NMR spectroscopy of the crude reaction mixture. <sup>c</sup>The enantiomeric excesses were determined by HPLC with a chiral AD-H column.

### 3. General procedure for the synthesis of dibenzo-fused azepines<sup>2-4</sup>

#### Procedure A (for dibenzo[*b,f*][1,4]oxazepines)<sup>2</sup>:

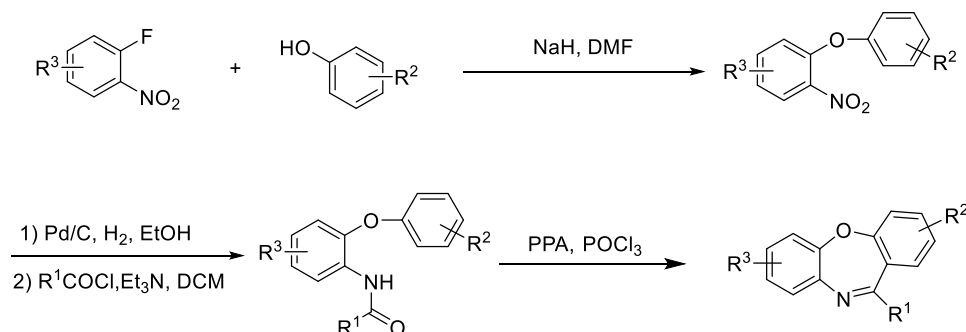

#### Typical procedure:

Step 1: To a reaction mixture of NaH (0.32 g, 8 mmol) and DMF (10 mL) was added dropwise a solution of phenol (0.71 g, 7.5 mmol) in DMF, it was stirred for 1 h at room temperature. Subsequently, o-fluoro nitrobenzene (0.71 g, 5 mmol) in DMF (2 mL) was dropped slowly to the mixture above and stirred for another 1 h at room temperature, then stirred for 12 h at 50 °C. After routine workup, the crude product was purified by flash chromatography on silica gel using petroleum ether and EtOAc to give the diphenyl ether derivative.

Step 2: The diphenyl ether derivative (2.0 g, 9.3 mmol) was dissolved in 5 mL of EtOH, 5% palladium on charcoal (0.10 g) and 0.25 mL of AcOH were added to the solution, the reduction was carried out with hydrogen gas at an initial pressure of 60 psi for 12 h. The catalyst was filtered off. Then concentration in vacuo and purification by flash chromatography afforded aniline derivative.

Step 3: The aniline derivative was dissolved in 20 mL of CH<sub>2</sub>Cl<sub>2</sub> and cooled to 0 °C, then acetyl chloride (0.70 g, 8.9 mmol) was added slowly to the solution, the temperature increased spontaneous to ambient temperature, and monitored by TLC. Then water (20 mL) was added to the mixture. The organic layers was washed by brine (1 × 30 mL), dried by anhydrous Na<sub>2</sub>SO<sub>4</sub>, concentrated in vacuo. The residue was purified by flash chromatography on silica gel using petroleum ether and EtOAc to give amido derivative.

Step 4: To a mixture of polyphosphoric acid (PPA) (7.0 g) and phosphorus

oxychloride (2.1 g, 13.5 mmol) was added amido derivative of diphenyl ether (0.62 g, 2.7 mmol). The reaction mixture was heated at 120 °C for 3 h and poured into ice-cold water, then treated with aqueous ammonia and extracted with CH<sub>2</sub>Cl<sub>2</sub> (3×50 mL), dried with anhydrous Na<sub>2</sub>SO<sub>4</sub>, and concentrated under vacuum. The crude product was purified by flash chromatography on silica gel eluted by petroleum ether and EtOAc to give **dibenzo[*b,f*][1,4]oxazepine**.

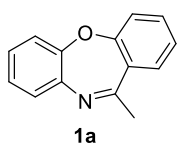

**11-methyldibenzo[*b,f*][1,4]oxazepine:** (Known compound, see: K. Gao, C.-B. Yu, W. Li, Y.-G. Zhou, X. Zhang, *Chem. Commun.* **2011**, 47, 7845). Yellow solid; <sup>1</sup>H NMR (300 MHz, CDCl<sub>3</sub>): δ (ppm)

7.45-7.39 (m, 2H), 7.29-7.25 (m, 1H), 7.21-7.13 (m, 5H), 2.64 (s, 3H); <sup>13</sup>C NMR (75 MHz, CDCl<sub>3</sub>): δ (ppm) 167.4, 161.0, 152.6, 140.8, 132.8, 129.2, 128.6, 127.8, 127.3, 125.7, 125.2, 120.9, 120.8, 27.7.

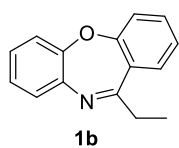

**11-ethyldibenzo[*b,f*][1,4]oxazepine:** (Known compound, see: K. Gao, C.-B. Yu, W. Li, Y.-G. Zhou, X. Zhang, *Chem. Commun.* **2011**, 47, 7845). Yellow solid; <sup>1</sup>H NMR (300 MHz, CDCl<sub>3</sub>): δ (ppm)

7.44-7.39 (m, 2H), 7.32-7.25 (m, 1H), 7.22-7.12 (m, 5H), 2.95 (q, *J* = 7.4 Hz, 2H), 1.30 (t, *J* = 7.4 Hz, 3H); <sup>13</sup>C NMR (75 MHz, CDCl<sub>3</sub>): δ (ppm) 171.7, 161.6, 152.7, 140.8, 132.7, 128.2, 127.8, 127.2, 125.6, 125.2, 121.0, 120.7, 33.3, 11.9.

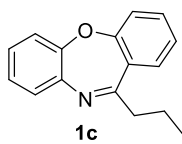

**11-propyldibenzo[*b,f*][1,4]oxazepine:** (Known compound, see: K. Gao, C.-B. Yu, W. Li, Y.-G. Zhou, X. Zhang, *Chem. Commun.* **2011**, 47, 7845). Yellow solid; <sup>1</sup>H NMR (300 MHz, CDCl<sub>3</sub>): δ (ppm)

7.39-7.34 (m, 2H), 7.31-7.27 (m, 1H), 7.17-7.08 (m, 5H), 2.89 (t, *J* = 7.5 Hz, 2H), 1.80-1.67 (m, 2H), 1.01 (t, *J* = 7.4 Hz, 3H); <sup>13</sup>C NMR (75 MHz, CDCl<sub>3</sub>): δ (ppm) 170.8, 161.5, 152.6, 140.8, 132.5, 128.2, 127.7, 127.1, 125.5, 125.1, 120.8, 120.6, 42.1, 20.9, 13.8.

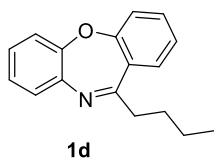

**11-butylidibenzo[*b,f*][1,4]oxazepine:** (Known compound, see: K. O. Lars, E. Fredrik, O. Roger, *Org. Lett.* **2006**, 8, 1771). Yellow solid;  $^1\text{H}$  NMR (300 MHz,  $\text{CDCl}_3$ ):  $\delta$  (ppm) 7.45-7.39 (m, 2H), 7.32-7.29 (m, 1H), 7.22-7.14 (m, 5H), 2.94 (t,  $J = 7.5$  Hz, 2H), 1.76-1.66 (m, 2H), 1.52-1.40 (m, 2H), 0.95 (t,  $J = 7.2$  Hz, 3H);  $^{13}\text{C}$  NMR (75 MHz,  $\text{CDCl}_3$ ):  $\delta$  (ppm) 171.2, 161.5, 152.7, 140.8, 132.6, 128.5, 128.3, 127.8, 127.2, 125.6, 125.2, 120.9, 120.7, 40.1, 29.8, 22.6, 14.1.

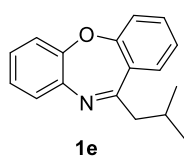

**11-isobutyldibenzo[*b,f*][1,4]oxazepine:** (New compound). Yellow solid;  $^1\text{H}$  NMR (300 MHz,  $\text{CDCl}_3$ ):  $\delta$  (ppm) 7.41-7.39 (m, 2H), 7.29-7.25 (m, 1H), 7.20-7.13 (m, 5H), 2.82 (d,  $J = 7.2$  Hz, 2H), 2.09-1.96 (m, 1H), 1.00 (d,  $J = 6.6$  Hz, 6H);  $^{13}\text{C}$  NMR (75 MHz,  $\text{CDCl}_3$ ):  $\delta$  (ppm) 170.8, 161.6, 152.8, 140.8, 132.6, 128.6, 128.4, 127.8, 127.2, 125.6, 125.1, 121.0, 120.7, 49.4, 27.6, 22.6.

HRMS-ESI exact mass calcd. for  $\text{C}_{15}\text{H}_{14}\text{NS}^+$  ( $[\text{M}+\text{H}]^+$ ) requires  $m/z$  252.13829, found  $m/z$  252.13870.

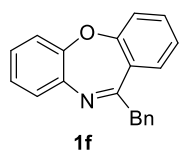

**11-benzylidibenzo[*b,f*][1,4]oxazepine:** (Known compound, see: K. Gao, C.-B. Yu, W. Li, Y.-G. Zhou, X. Zhang, *Chem. Commun.* **2011**, 47, 7845). Yellow solid;  $^1\text{H}$  NMR (300 MHz,  $\text{CDCl}_3$ ):  $\delta$  (ppm) 7.45-7.42 (m, 1H), 7.39-7.34 (m, 4H), 7.29-7.25 (m, 2H), 7.21-7.09 (m, 6H), 4.29 (s, 2H);  $^{13}\text{C}$  NMR (75 MHz,  $\text{CDCl}_3$ ):  $\delta$  (ppm) 168.7, 161.6, 152.6, 140.7, 137.5, 132.7, 128.9, 128.7, 128.4, 128.2, 127.9, 127.5, 126.7, 125.6, 125.0, 120.9, 120.7, 46.9.

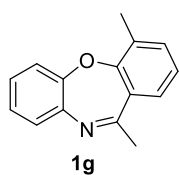

**4,11-dimethyldibenzo[*b,f*][1,4]oxazepine:** (Known compound, see: K. Gao, C.-B. Yu, W. Li, Y.-G. Zhou, X. Zhang, *Chem. Commun.* **2011**, 47, 7845). Yellow solid;  $^1\text{H}$  NMR (400 MHz,  $\text{CDCl}_3$ ):  $\delta$  (ppm) 7.28-7.24 (m, 3H), 7.16-7.13 (m, 3H), 7.07-7.04 (m, 1H), 2.62 (s, 3H), 2.47 (s, 3H);  $^{13}\text{C}$  NMR (100 MHz,  $\text{CDCl}_3$ ):  $\delta$  (ppm) 167.9, 158.8, 152.4, 141.1, 133.9, 130.2, 129.1, 127.7, 127.0, 126.2, 125.5, 124.7, 121.0, 27.9, 16.4.



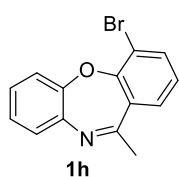

**4-bromo-11-methyldibenzo[*b,f*][1,4]oxazepine:** (Known compound, see: K. Gao, C.-B. Yu, W. Li, Y.-G. Zhou, X. Zhang, *Chem. Commun.*

**2011**, 47, 7845). Yellow solid;  $^1\text{H}$  NMR (400 MHz,  $\text{CDCl}_3$ ):  $\delta$  (ppm)

7.67 (d,  $J = 8.0$  Hz, 2H), 7.44-7.37 (m, 2H), 7.29-7.26 (m, 1H),

7.19-7.17 (m, 2H), 7.09-7.05 (m, 1H), 2.64 (s, 3H);  $^{13}\text{C}$  NMR (100 MHz,  $\text{CDCl}_3$ ):  $\delta$  (ppm) 166.4, 156.5, 152.0, 140.4, 135.8, 130.6, 127.7, 127.6, 127.5, 126.1, 121.7, 115.7, 27.8.

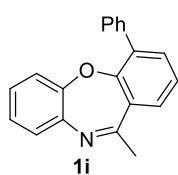

**11-methyl-4-phenyldibenzo[*b,f*][1,4]oxazepine:** (Known compound, see: K. Gao, C.-B. Yu, W. Li, Y.-G. Zhou, X. Zhang, *Chem. Commun.*

**2011**, 47, 7845). Yellow solid;  $^1\text{H}$  NMR (300 MHz,  $\text{CDCl}_3$ ):  $\delta$  (ppm)

7.59-7.39 (m, 7H), 7.26-7.18 (m, 2H), 7.06-7.02 (m, 1H), 6.91-6.86

(m, 1H), 6.33 (d,  $J = 7.8$  Hz, 1H), 2.68 (s, 3H);  $^{13}\text{C}$  NMR (75 MHz,  $\text{CDCl}_3$ ):  $\delta$  (ppm) 167.5, 157.2, 152.2, 140.9, 137.1, 134.8, 133.4, 130.0, 129.8, 128.2, 127.7, 127.5, 127.3, 127.0, 125.5, 125.0, 120.8, 27.9.

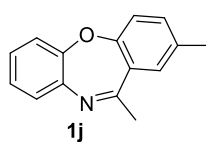

**2,11-dimethyldibenzo[*b,f*][1,4]oxazepine:** (Known compound, see: K. Gao, C.-B. Yu, W. Li, Y.-G. Zhou, X. Zhang, *Chem. Commun.*

**2011**, 47, 7845). Yellow solid;  $^1\text{H}$  NMR (500 MHz,  $\text{CDCl}_3$ ):  $\delta$  (ppm)

7.27-7.25 (m, 1H), 7.20-7.19 (m, 2H), 7.13-7.11 (m, 3H), 7.06-7.04 (m, 1H), 2.62 (s, 3H), 2.31 (s, 3H);  $^{13}\text{C}$  NMR (125 MHz,  $\text{CDCl}_3$ ):  $\delta$  (ppm) 167.4, 158.9, 152.8, 140.8, 134.7, 133.4, 128.8, 128.8, 127.7, 127.2, 125.5, 120.6, 120.5, 27.6, 20.9.

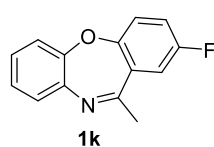

**2-fluoro-11-methyldibenzo[*b,f*][1,4]oxazepine:** (Known

compound, see: K. Gao, C.-B. Yu, W. Li, Y.-G. Zhou, X. Zhang,

*Chem. Commun.* **2011**, 47, 7845). Yellow solid;  $^1\text{H}$  NMR (300

MHz,  $\text{CDCl}_3$ ):  $\delta$  (ppm) 7.29-7.26 (m, 1H), 7.18-7.09 (m, 6H), 2.62 (s, 3H);  $^{13}\text{C}$  NMR (75 MHz,  $\text{CDCl}_3$ ):  $\delta$  (ppm) 165.9, 159.5 (d,  $J_{1\text{C-F}} = 243.0$  Hz), 156.8, 152.5, 140.4, 130.1 (d,  $J_{3\text{C-F}} = 6.8$  Hz), 127.9, 127.7, 125.9, 122.2 (d,  $J_{3\text{C-F}} = 6.8$  Hz), 120.6, 119.4 (d,  $J_{2\text{C-F}} = 23.3$  Hz), 114.8 (d,  $J_{2\text{C-F}} = 23.3$  Hz), 27.5.

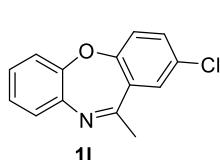

**2-chloro-11-methyldibenzo[*b,f*][1,4]oxazepine:** (New

compound). Yellow oil;  $^1\text{H}$  NMR (300 MHz,  $\text{CDCl}_3$ ):  $\delta$  (ppm) 7.38-7.34 (m, 2H), 7.29-7.26 (m, 1H), 7.19-7.08 (m, 4H), 2.61 (s, 3H);  $^{13}\text{C}$  NMR (75 MHz,  $\text{CDCl}_3$ ):  $\delta$  (ppm) 165.9, 159.4, 152.2, 140.4, 132.6, 130.6, 130.3, 128.3, 127.9, 127.7, 125.9, 122.3, 120.7, 27.5.

HRMS-ESI exact mass calcd. for  $\text{C}_{15}\text{H}_{14}\text{NS}^+([\text{M}+\text{H}]^+)$  requires  $m/z$  244.05237, found  $m/z$  244.05313.

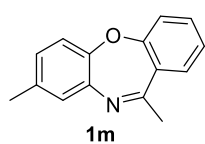

**8,11-dimethyldibenzo[*b,f*][1,4]oxazepine:** (New compound).

Yellow oil;  $^1\text{H}$  NMR (300 MHz,  $\text{CDCl}_3$ ):  $\delta$  (ppm) 7.44-7.39 (m, 2H), 7.20-7.15 (m, 1H), 7.09 (s, 1H), 7.04-7.02 (m, 1H), 6.96-6.93 (m, 1H), 2.64 (s, 3H), 2.29 (s, 3H);  $^{13}\text{C}$  NMR (75 MHz,  $\text{CDCl}_3$ ):  $\delta$  (ppm) 167.3, 161.0, 150.5, 140.2, 135.3, 132.7, 129.2, 128.5, 128.1, 127.9, 125.0, 120.8, 120.3, 27.6, 20.8.

HRMS-ESI exact mass calcd. for  $\text{C}_{15}\text{H}_{14}\text{NS}^+([\text{M}+\text{H}]^+)$  requires  $m/z$  224.10699, found  $m/z$  224.10750.

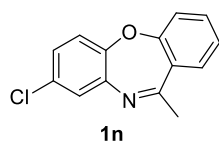

**8-chloro-11-methyldibenzo[*b,f*][1,4]oxazepine:** (Known

compound, see: P. Li, Y. Huang, X. Hu, X.-Q. Dong, X. Zhang, *Org. Lett.* **2017**, *19*, 3855). Yellow solid;  $^1\text{H}$  NMR (300 MHz,  $\text{CDCl}_3$ ):  $\delta$  (ppm) 7.42-7.37 (m, 2H), 7.25 (s, 1H), 7.22-7.11 (m, 2H), 7.08-7.01 (m, 2H), 2.60 (s, 3H);  $^{13}\text{C}$  NMR (75 MHz,  $\text{CDCl}_3$ ):  $\delta$  (ppm) 168.6, 160.6, 151.1, 141.7, 133.0, 130.5, 128.8, 128.6, 127.4, 126.9, 125.3, 121.6, 120.7, 27.6.

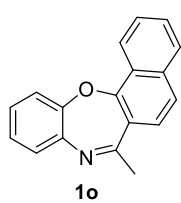

**7-methylbenzo[*b*]naphtho[2,1-*f*][1,4]oxazepine:** (Known

compound, see: P. Li, Y. Huang, X. Hu, X.-Q. Dong, X. Zhang, *Org. Lett.* **2017**, *19*, 3855). Yellow solid;  $^1\text{H}$  NMR (300 MHz,  $\text{CDCl}_3$ ):  $\delta$  (ppm) 8.57 (d,  $J = 8.1$  Hz, 1H), 7.81 (d,  $J = 7.8$  Hz, 1H), 7.64-7.54 (m, 3H), 7.44 (d,  $J = 8.7$  Hz, 1H), 7.34-7.24 (m, 2H), 7.17-7.13 (m, 2H), 2.70 (s, 3H);  $^{13}\text{C}$  NMR (75 MHz,  $\text{CDCl}_3$ ):  $\delta$  (ppm) 168.1, 156.6, 152.6, 141.3, 136.0, 128.1, 127.8, 127.7, 127.5, 127.2, 126.6, 125.7, 124.9, 124.3, 123.9, 123.2, 120.9, 27.8.

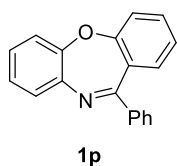

**11-phenyldibenzo[*b,f*][1,4]oxazepine:** (Known compound, see: K. Gao, C.-B. Yu, W. Li, Y.-G. Zhou, X. Zhang, *Chem. Commun.* **2011**, 47, 7845). Yellow solid;  $^1\text{H}$  NMR (400 MHz,  $\text{CDCl}_3$ ):  $\delta$  (ppm) 7.88-7.86 (m, 2H), 7.54-7.49 (m, 5H), 7.32-7.16 (m, 6H);  $^{13}\text{C}$  NMR (100 MHz,  $\text{CDCl}_3$ ):  $\delta$  (ppm) 167.3, 162.2, 152.6, 140.8, 140.1, 133.2, 131.5, 130.6, 129.9, 128.3, 127.7, 127.5, 125.7, 124.6, 121.1, 120.8.

**Procedure B (for dibenzo[*b,f*][1,4]thiazepines)<sup>3</sup>:**

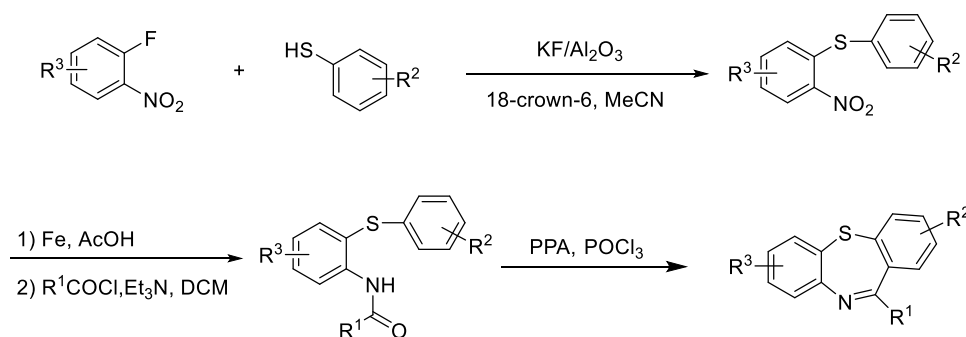

**Typical procedure:**

The diphenyl thioether derivatives were obtained by the treatment of o-fluoro nitrobenzenes with substituted thiophenols in the presence of  $\text{KF}/\text{Al}_2\text{O}_3$  and 18-crown-6 in acetonitrile. Then the reduction of nitro group with  $\text{Fe}/\text{AcOH}$  followed by acylation with acyl chloride afforded amide derivatives. Subsequently, amide derivatives were transformed to dibenzothiazepines via cyclization with polyphosphoric acid (PPA) and  $\text{POCl}_3$  at 120 °C.

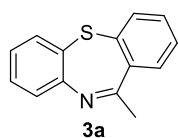

**11-methyldibenzo[*b,f*][1,4]thiazepine:** (Known compound, see: J. Wang, *Tetrahedron Lett.* **2013**, 54, 5956). Yellow solid;  $^1\text{H}$  NMR (400 MHz,  $\text{CDCl}_3$ ):  $\delta$  (ppm) 7.46-7.38 (m, 3H), 7.31-7.23 (m, 3H), 7.19-7.17 (m, 1H), 7.05-7.01 (m, 1H), 2.65 (s, 3H);  $^{13}\text{C}$  NMR (100 MHz,  $\text{CDCl}_3$ ):  $\delta$  (ppm) 169.8, 148.7, 139.9, 139.4, 132.4, 132.0, 130.7, 129.2, 128.8, 128.4, 127.9, 125.6, 125.4, 29.6.

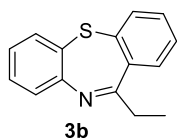

**11-ethyldibenzo[*b,f*][1,4]thiazepine:** (Known compound, see: J. Wang, *Tetrahedron Lett.* **2013**, *54*, 5956). Yellow solid;  $^1\text{H}$  NMR (400 MHz,  $\text{CDCl}_3$ ):  $\delta$  (ppm) 7.46-7.36 (m, 3H), 7.31-7.22 (m, 3H), 7.19-7.17 (m, 1H), 7.04-7.00 (m, 1H), 2.96-2.90 (m, 2H), 1.26 (t,  $J = 7.4$  Hz, 3H);  $^{13}\text{C}$  NMR (100 MHz,  $\text{CDCl}_3$ ):  $\delta$  (ppm) 174.2, 148.8, 140.6, 139.0, 132.4, 131.9, 130.5, 129.1, 128.9, 128.4, 127.6, 125.3, 125.3, 35.4, 11.7.

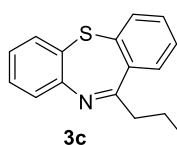

**11-propyldibenzo[*b,f*][1,4]thiazepine:** (Known compound, see: J. Wang, *Tetrahedron Lett.* **2013**, *54*, 5956). Yellow solid;  $^1\text{H}$  NMR (400 MHz,  $\text{CDCl}_3$ ):  $\delta$  (ppm) 7.45-7.36 (m, 3H), 7.30-7.22 (m, 3H), 7.19-7.17 (m, 1H), 7.04-7.00 (m, 1H), 3.02-2.95 (m, 1H), 2.85-2.78 (m, 1H), 1.74-1.65 (m, 2H), 1.04 (t,  $J = 7.4$  Hz, 3H);  $^{13}\text{C}$  NMR (100 MHz,  $\text{CDCl}_3$ ):  $\delta$  (ppm) 173.4, 148.8, 140.6, 138.9, 132.4, 132.0, 130.5, 129.1, 128.9, 128.4, 127.8, 125.4, 44.4, 20.8, 14.0.

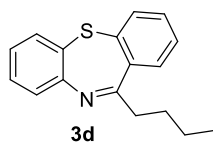

**11-butyldibenzo[*b,f*][1,4]thiazepine:** (New compound). Yellow solid;  $^1\text{H}$  NMR (400 MHz,  $\text{CDCl}_3$ ):  $\delta$  (ppm) 7.46-7.36 (m, 3H), 7.31-7.16 (m, 4H), 7.04-7.00 (m, 1H), 3.00-2.84 (m, 2H), 1.71-1.42 (m, 4H), 0.92 (t,  $J = 7.2$  Hz, 3H);  $^{13}\text{C}$  NMR (100 MHz,  $\text{CDCl}_3$ ):  $\delta$  (ppm) 173.6, 148.8, 140.6, 139.0, 132.4, 131.9, 130.5, 129.1, 128.9, 128.4, 127.7, 125.4, 125.4, 42.3, 29.6, 22.6, 14.1.

HRMS-ESI exact mass calcd. for  $\text{C}_{17}\text{H}_{18}\text{NS}^+([\text{M}+\text{H}]^+)$  requires  $m/z$  268.11545, found  $m/z$  268.11541.

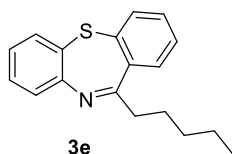

**11-pentyldibenzo[*b,f*][1,4]thiazepine:** (Known compound, see: J. Wang, *Tetrahedron Lett.* **2013**, *54*, 5956). Yellow oil;  $^1\text{H}$  NMR (300 MHz,  $\text{CD}_2\text{Cl}_2$ ):  $\delta$  (ppm) 7.48-7.24 (m, 6H), 7.16-7.02 (m, 2H), 3.02-2.81 (m, 2H), 1.71-1.64 (m, 2H), 1.48-1.36 (m, 4H), 0.90 (t,  $J = 7.1$  Hz, 3H);  $^{13}\text{C}$  NMR (100 MHz,  $\text{CDCl}_3$ ):  $\delta$  (ppm) 173.6, 148.8, 140.6, 139.0, 132.4, 131.9, 130.5, 129.1, 128.9, 128.4, 127.7, 125.4, 42.5, 31.7, 27.1, 22.6, 14.1.

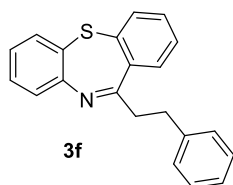

**11-phenethylidibenzobenzothiazepine:** (Known compound, see: J. Wang, *Tetrahedron Lett.* **2013**, *54*, 5956). Yellow solid;  $^1\text{H}$  NMR (400 MHz,  $\text{CDCl}_3$ ):  $\delta$  (ppm) 7.45-7.40 (m, 2H), 7.34-7.17 (m, 10H), 7.05-7.01 (m, 1H), 3.27-3.12 (m, 3H), 3.03-2.96 (m, 1H);  $^{13}\text{C}$  NMR (100 MHz,  $\text{CDCl}_3$ ):  $\delta$  (ppm) 172.1, 148.8, 141.7, 140.7, 138.9, 132.4, 132.0, 130.6, 129.2, 128.8, 128.7, 128.5, 128.5, 127.7, 126.1, 125.5, 125.4, 43.9, 33.3.

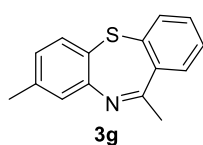

**8,11-dimethyldibenzobenzothiazepine:** (New compound). Yellow oil;  $^1\text{H}$  NMR (300 MHz,  $\text{CDCl}_3$ ):  $\delta$  (ppm) 7.44-7.37 (m, 2H), 7.30-7.24 (m, 3H), 7.01 (s, 1H), 6.85 (d,  $J = 7.8$  Hz, 1H), 2.64 (s, 3H), 2.27 (s, 3H);  $^{13}\text{C}$  NMR (100 MHz,  $\text{CDCl}_3$ ):  $\delta$  (ppm) 169.7, 148.5, 140.2, 139.5, 139.3, 132.2, 131.9, 130.7, 128.3, 127.9, 126.5, 125.9, 125.6, 29.6, 21.2.

HRMS-ESI exact mass calcd. for  $\text{C}_{15}\text{H}_{14}\text{NS}^+([\text{M}+\text{H}]^+)$  requires  $m/z$  240.08415, found  $m/z$  240.08429.

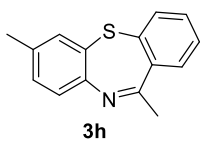

**7,11-dimethyldibenzobenzothiazepine:** (Known compound, see: J. Wang, *Tetrahedron Lett.* **2013**, *54*, 5956). Yellow oil;  $^1\text{H}$  NMR (300 MHz,  $\text{CDCl}_3$ ):  $\delta$  (ppm) 7.46-7.37 (m, 2H), 7.32-7.26 (m, 2H), 7.24 (s, 1H), 7.10-7.00 (m, 1H), 2.65 (s, 3H), 2.27 (s, 3H);  $^{13}\text{C}$  NMR (100 MHz,  $\text{CDCl}_3$ ):  $\delta$  (ppm) 169.3, 146.4, 139.9, 139.5, 135.5, 132.8, 131.9, 130.7, 130.1, 128.4, 128.0, 125.3, 29.6, 20.7.

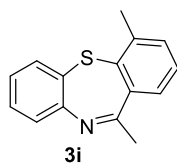

**4,11-dimethyldibenzobenzothiazepine:** (Known compound, see: J. Wang, *Tetrahedron Lett.* **2013**, *54*, 5956). Yellow oil;  $^1\text{H}$  NMR (300 MHz,  $\text{CDCl}_3$ ):  $\delta$  (ppm) 7.44 (d,  $J = 7.2$  Hz, 1H), 7.27-7.15 (m, 5H), 7.05-6.99 (m, 1H), 2.64 (s, 3H), 2.53 (s, 3H);  $^{13}\text{C}$  NMR (100 MHz,  $\text{CDCl}_3$ ):  $\delta$  (ppm) 170.6, 149.3, 140.0, 139.5, 139.4, 132.8, 131.8, 129.2, 128.6, 128.0, 125.5, 125.3, 125.1, 29.8, 21.2.

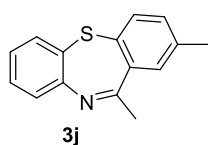

**2,11-dimethyldibenzo[*b,f*][1,4]thiazepine:** (Known compound, see: J. Wang, *Tetrahedron Lett.* **2013**, *54*, 5956). Yellow oil;  $^1\text{H}$  NMR (400 MHz,  $\text{CDCl}_3$ ):  $\delta$  (ppm) 7.40-7.38 (m, 1H), 7.40-7.38 (m, 1H), 7.32 (d,  $J = 8.0$  Hz, 1H), 7.04-7.00 (m, 1H), 2.64 (s, 3H), 2.31 (s, 3H);  $^{13}\text{C}$  NMR (100 MHz,  $\text{CDCl}_3$ ):  $\delta$  (ppm) 169.9, 148.8, 139.2, 138.5, 136.7, 132.3, 131.8, 131.6, 129.1, 129.1, 128.5, 125.5, 125.3, 29.6, 21.3.

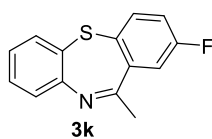

**2-fluoro-11-methyldibenzo[*b,f*][1,4]thiazepine:** (Known compound, see: J. Wang, *Tetrahedron Lett.* **2013**, *54*, 5956). Yellow oil;  $^1\text{H}$  NMR (300 MHz,  $\text{CDCl}_3$ ):  $\delta$  (ppm) 7.44-7.39 (m, 2H), 7.30-7.25 (m, 1H), 7.19-7.16 (m, 1H), 7.11-6.99 (m, 3H), 2.64 (s, 3H);  $^{13}\text{C}$  NMR (100 MHz,  $\text{CDCl}_3$ ):  $\delta$  (ppm) 168.2, 162.7 (d,  $J_{\text{C-F}} = 248.0$  Hz), 148.5, 140.9 (d,  $J_{\text{C-F}} = 7.0$  Hz), 135.3 (d,  $J_{\text{C-F}} = 3.0$  Hz), 133.7 (d,  $J_{\text{C-F}} = 8.0$  Hz), 132.4, 129.4, 128.6, 125.8, 125.4, 117.9 (d,  $J_{\text{C-F}} = 21.0$  Hz), 114.9 (d,  $J_{\text{C-F}} = 23.0$  Hz), 29.3.

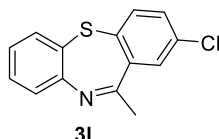

**2-chloro-11-methyldibenzo[*b,f*][1,4]thiazepine:** (Known compound, see: J. Wang, *Tetrahedron Lett.* **2013**, *54*, 5956). Yellow oil;  $^1\text{H}$  NMR (600 MHz,  $\text{CDCl}_3$ ):  $\delta$  (ppm) 7.40-7.36 (m, 3H), 7.29-7.26 (m, 2H), 7.18-7.17 (m, 1H), 7.07-7.05 (m, 1H), 2.64 (s, 3H);  $^{13}\text{C}$  NMR (125 MHz,  $\text{CDCl}_3$ ):  $\delta$  (ppm) 168.2, 148.6, 140.6, 138.5, 134.7, 133.2, 132.5, 130.8, 129.5, 128.3, 127.9, 125.9, 125.5, 29.4.

#### Procedure C (for dibenzo[*b,e*]azepines)<sup>4</sup>:

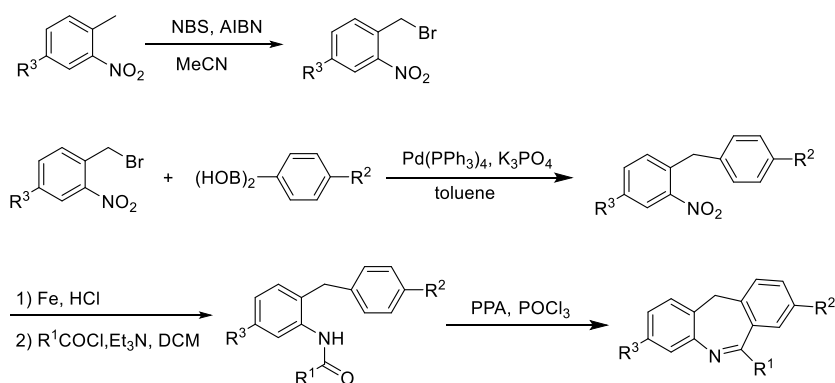

### Typical procedure for the synthesis of 5h:

**Step 1:** To a solution of 4-chloro-1-methyl-2-nitrobenzene (20 g, 1 eq.) in CH<sub>3</sub>CN, NBS (26 g, 1 eq.) and AIBN (2.3 g, 0.1 eq.) was added under N<sub>2</sub>. The reaction was allowed to reflux overnight. Solvent was removed by distillation and the resulting mixture was filtered to remove solid particles. The residue was purified by silica gel, (PET/EA = 20 : 1) to provide 1-(bromomethyl)-4-chloro-2-nitrobenzene (yellow solid, 30 g).

**Step 2:** To a solution of 1-(bromomethyl)-4-chloro-2-nitrobenzene (5 g, 1 eq.) in toluene, K<sub>2</sub>CO<sub>3</sub> (6 g, 2 eq.), Pd(PPh<sub>3</sub>)<sub>4</sub> (0.26 g, 0.01 eq.) and phenylboronic acid (1 eq.) was added under N<sub>2</sub>. After stirring at 80 °C overnight, the reaction mixture was poured into water and extracted with dichloromethane. The combined extracts were washed with brine, dried with anhydrous magnesium sulfate, and evaporated in vacuo. The residue was purified by silica gel column chromatography (PE/EA = 5:1) to provide 1-benzyl-4-chloro-2-nitrobenzene (yellow oil, 2.4-2.9 g).

**Step 3:** To a solution of 1-benzyl-4-chloro-2-nitrobenzene (2.4-2.9 g, 1 eq.) in EtOH and H<sub>2</sub>O, con. HCl and Fe powder (5 eq.) was added under N<sub>2</sub>. The reaction was allowed to reflux overnight. Solvent was removed by distillation and the resulting mixture was filtered to remove solid particles. The residue was neutralized with 7M NaOH aqueous solution until pH >7. The result aqueous phase was extracted with dichloromethane, dried with anhydrous magnesium sulfate, and evaporated in vacuo. The residue was purified by silica gel column chromatography (PE/EA = 10:1) to provide 2-benzyl-5-chloroaniline (yellow oil, 2.0-2.5 g).

**Step 4:** To a solution of 2-benzyl-5-chloroaniline (2.0-2.5 g, 1 eq.) in DCM, AcCl (1.1 eq.) and Et<sub>3</sub>N (2 eq.) was added at 0 °C under N<sub>2</sub>. After stirring at room temperature for 1 h, the reaction mixture was poured into water and extracted with dichloromethane. The combined extracts were washed with brine, dried with anhydrous magnesium sulfate, and evaporated in vacuo. The residue was purified by silica gel column chromatography (PE/EA = 5:1) to provide *N*-(2-benzyl-5-chlorophenyl)acetamide (yellow oil, 2.4-3.0 g).

**Step 5:** To a solution of *N*-(2-benzyl-5-chlorophenyl)acetamide (2.4-3.0 g, 1 eq.)

in PPA, POCl<sub>3</sub> (5 eq.) was added under N<sub>2</sub>. After stirring at 120 °C for 3 h, the reaction mixture was added ice water and neutralized with ammonia until pH >7. The resulting aqueous phase was extracted with dichloromethane, dried over anhydrous magnesium sulfate, and evaporated in vacuo. The residue was purified by silica gel column chromatography (PE/EA = 20:1) to provide 3-chloro-6-methyl-11*H*-dibenzo[*b,e*]azepine **5h** (yellow oil, 2.2-2.8 g).

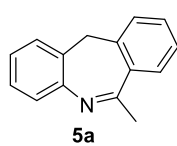

**6-methyl-11*H*-dibenzo[*b,e*]azepine:** (Known compound, see: P. Li, Y. Huang, X. Hu, X.-Q. Dong, X. Zhang, *Org. Lett.* **2017**, *19*, 3855).

Yellow solid; <sup>1</sup>H NMR (300 MHz, CDCl<sub>3</sub>): δ (ppm) 7.39 (d, *J* = 7.5 Hz, 1H), 7.28-7.24 (m, 2H), 7.17-7.12 (m, 4H), 7.06-7.01 (m, 1H), 3.52 (s, 2H), 2.63 (s, 3H); <sup>13</sup>C NMR (75 MHz, CDCl<sub>3</sub>): δ (ppm) 167.4, 145.6, 142.4, 133.7, 132.8, 130.8, 127.2, 127.0, 126.6, 126.5, 125.9, 125.2, 39.1, 28.6.

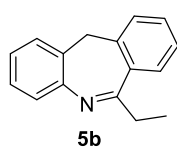

**6-ethyl-11*H*-dibenzo[*b,e*]azepine:** (Known compound, see: P. Li, Y. Huang, X. Hu, X.-Q. Dong, X. Zhang, *Org. Lett.* **2017**, *19*, 3855).

Yellow oil; <sup>1</sup>H NMR (300 MHz, CDCl<sub>3</sub>): 7.45 (d, *J* = 7.2 Hz, 1H), 7.35-7.30 (m, 1H), 7.25-7.15 (m, 5H), 7.09-7.04 (m, 1H), 3.55 (s, 2H), 3.00-2.96 (m, 2H), 1.25 (t, *J* = 7.5 Hz, 3H); <sup>13</sup>C NMR (75 MHz, CDCl<sub>3</sub>): δ (ppm) 172.0, 145.7, 143.1, 133.0, 132.9, 130.7, 127.1, 127.0, 126.9, 126.6, 126.5, 125.7, 125.2, 39.1, 34.4, 12.3.

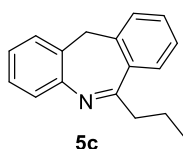

**6-propyl-11*H*-dibenzo[*b,e*]azepine:** (New compound). Yellow solid;

<sup>1</sup>H NMR (300 MHz, CDCl<sub>3</sub>): 7.43 (d, *J* = 7.2 Hz, 1H), 7.33-7.14 (m, 6H), 7.08-7.03 (m, 1H), 3.54 (s, 2H), 3.05-2.87 (m, 2H), 1.73-1.63 (m, 2H), 0.99 (t, *J* = 7.4 Hz, 3H); <sup>13</sup>C NMR (75 MHz, CDCl<sub>3</sub>): δ (ppm) 171.2, 145.7, 143.1, 133.0, 132.9, 130.7, 127.1, 127.0, 127.0, 126.6, 126.5, 125.7, 125.3, 43.4, 39.2, 21.4, 14.1.

HRMS-ESI exact mass calcd. for C<sub>17</sub>H<sub>18</sub>N<sup>+</sup>([M+H]<sup>+</sup>) requires *m/z* 236.14338, found *m/z* 236.14344.



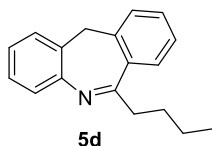

**6-methyl-11H-dibenzo[b,e]azepine:** (New compound). Yellow oil;  
 $^1\text{H}$  NMR (300 MHz,  $\text{CDCl}_3$ ): 7.46 (d,  $J = 7.2$  Hz, 1H), 7.36-7.04 (m, 7H), 3.56 (s, 2H), 3.07-2.91 (m, 2H), 1.67-1.64 (m, 2H), 1.46-1.39 (m, 2H), 0.92 (t,  $J = 7.2$  Hz, 3H);  $^{13}\text{C}$  NMR (75 MHz,  $\text{CDCl}_3$ ):  $\delta$  (ppm) 171.4, 145.7, 143.1, 133.0, 132.9, 130.7, 127.0, 127.0, 126.6, 126.5, 125.7, 125.3, 41.3, 39.1, 30.3, 22.8, 14.1.

HRMS-ESI exact mass calcd. for  $\text{C}_{18}\text{H}_{20}\text{N}^+([\text{M}+\text{H}]^+)$  requires  $m/z$  250.15903, found  $m/z$  250.15922.

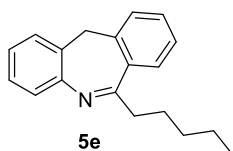

**6-pentyl-11H-dibenzo[b,e]azepine:** (New compound). Yellow oil;  
 $^1\text{H}$  NMR (400 MHz,  $\text{CDCl}_3$ ): 7.54-7.52 (m, 1H), 7.41-7.24 (m, 6H), 7.16-7.13 (m, 1H), 3.63 (s, 2H), 3.15-2.98 (m, 2H), 1.76-1.74 (m, 2H), 1.45 (s, 4H), 0.98-0.94 (m, 3H);  $^{13}\text{C}$  NMR (100 MHz,  $\text{CDCl}_3$ ):  $\delta$  (ppm) 171.3, 145.6, 143.0, 132.9, 132.9, 130.6, 127.0, 126.9, 126.5, 126.4, 125.7, 125.2, 41.4, 39.1, 31.8, 27.7, 22.6, 14.1.

HRMS-ESI exact mass calcd. for  $\text{C}_{19}\text{H}_{22}\text{N}^+([\text{M}+\text{H}]^+)$  requires  $m/z$  264.17468, found  $m/z$  264.17468.

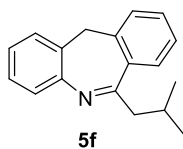

**6-isobutyl-11H-dibenzo[b,e]azepine:** (New compound). Yellow oil;  
 $^1\text{H}$  NMR (400 MHz,  $\text{CDCl}_3$ ): 7.46 (d,  $J = 7.2$  Hz, 1H), 7.37-7.33 (m, 1H), 7.26-7.17 (m, 5H), 7.10-7.07 (m, 1H), 3.61-3.59 (m, 2H), 3.16-3.13 (m, 1H), 2.69-2.64 (m, 1H), 2.04-1.98 (m, 1H), 0.98-0.97 (m, 6H);  $^{13}\text{C}$  NMR (100 MHz,  $\text{CDCl}_3$ ):  $\delta$  (ppm) 170.9, 145.6, 142.9, 133.0, 132.9, 130.8, 127.3, 127.1, 127.0, 126.7, 126.5, 125.9, 125.4, 50.6, 39.2, 27.5, 23.4, 22.2.

HRMS-ESI exact mass calcd. for  $\text{C}_{18}\text{H}_{20}\text{N}^+([\text{M}+\text{H}]^+)$  requires  $m/z$  250.15903, found  $m/z$  250.15897.

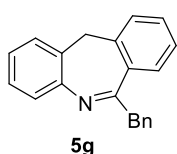

**6-methyl-11H-dibenzo[b,e]azepine:** (New compound). Yellow oil;  
 $^1\text{H}$  NMR (300 MHz,  $\text{CDCl}_3$ ):  $\delta$  (ppm) 7.51 (d,  $J = 7.2$  Hz, 1H),

7.31-7.05 (m, 12H), 4.40-4.21 (m, 1H), 3.43 (s, 3H);  $^{13}\text{C}$  NMR (100 MHz,  $\text{CDCl}_3$ ):  $\delta$  (ppm) 169.4, 145.4, 143.2, 138.1, 132.9, 132.7, 130.8, 129.1, 128.6, 127.1, 127.1, 127.0, 126.6, 126.4, 126.1, 125.4, 48.1, 39.1.

HRMS-ESI exact mass calcd. for  $\text{C}_{21}\text{H}_{18}\text{N}^+$  ( $[\text{M}+\text{H}]^+$ ) requires  $m/z$  284.14338, found  $m/z$  284.14350.

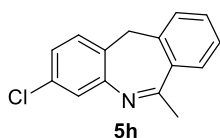

**3-chloro-6-methyl-11H-dibenzo[*b,e*]azepine:** (Known compound, see: P. Li, Y. Huang, X. Hu, X.-Q. Dong, X. Zhang, *Org. Lett.* **2017**, *19*, 3855). Yellow solid;  $^1\text{H}$  NMR (400 MHz,  $\text{CDCl}_3$ ):  $\delta$  (ppm) 7.49 (d,  $J = 8.0$  Hz, 1H), 7.39-7.35 (m, 1H), 7.29-7.23 (m, 3H), 7.11-7.04 (m, 2H), 3.58 (s, 2H), 2.68(s, 3H);  $^{13}\text{C}$  NMR (100 MHz,  $\text{CDCl}_3$ ):  $\delta$  (ppm) 169.0, 146.6, 142.1, 133.6, 132.4, 131.4, 131.2, 128.1, 127.3, 126.8, 126.7, 125.8, 125.1, 38.4, 28.7.

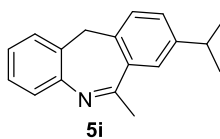

**8-isopropyl-6-methyl-11H-dibenzo[*b,e*]azepine:** (Known compound, see: P. Li, Y. Huang, X. Hu, X.-Q. Dong, X. Zhang, *Org. Lett.* **2017**, *19*, 3855). Yellow solid;  $^1\text{H}$  NMR (400 MHz,  $\text{CDCl}_3$ ):  $\delta$  (ppm) 7.31 (s, 1H), 7.25-7.11 (m, 5H), 7.08-7.04 (m, 1H), 3.55 (s, 2H), 2.89-2.82 (m, 1H), 2.69 (s, 3H), 1.20-1.18 (m, 6H);  $^{13}\text{C}$  NMR (100 MHz,  $\text{CDCl}_3$ ):  $\delta$  (ppm) 167.6, 147.0, 145.7, 140.0, 133.6, 133.0, 129.0, 127.0, 126.9, 126.6, 125.7, 125.2, 125.2, 38.6, 33.9, 28.6, 24.0.

## 4. General procedure for the asymmetric hydrogenation of dibenzo-fused azepines

### Procedure A (for dihydrodibenzo[*b,f*][1,4]oxazepines)

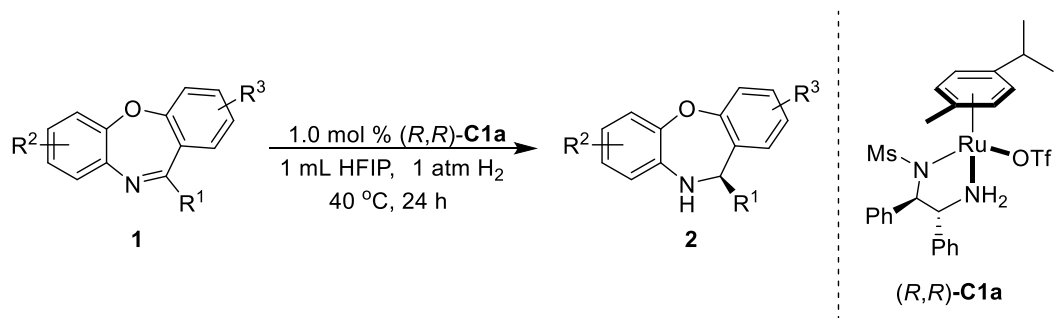

**General procedure:** A 30 mL glass-lined stainless-steel reactor equipped with a magnetic stirrer bar was charged with substrate dibenzo[*b,f*][1,4]oxazepine (0.2 mmol), Ru-catalyst  $(R,R)$ -**C1a** (0.002 mmol) in 1 mL of HFIP under  $N_2$  atmosphere in a glove box. The autoclave was closed, and the final pressure of the hydrogen gas was adjusted to 1 atm after purging the autoclave with hydrogen gas three times. The reaction mixture was stirred at 40 °C for 24 h. Then the hydrogen gas was carefully released. The conversion was determined by  $^1H$  NMR spectroscopy of the crude reaction mixture. The reaction mixture was filtered through a short pad of silica eluted with EA and PET to give isolated product dihydrodibenzo[*b,f*][1,4]oxazepine, and the enantiomeric excess of the product was determined by HPLC with a chiral column.

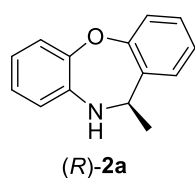

**$(R)$ -11-methyl-10,11-dihydrodibenzo[*b,f*][1,4]oxazepine:** (Known compound, see: K. Gao, C.-B. Yu, W. Li, Y.-G. Zhou, X. Zhang, *Chem. Commun.* **2011**, 47, 7845). Yellow oil, isolated yield 95%, 97% ee;  $[\alpha]_D^{25} = +41.4$  ( $c = 1.0$ ,  $CHCl_3$ ), [Lit.<sup>2</sup>  $[\alpha]_D^{30} = -109.1$  ( $c = 1.26$ ,  $CHCl_3$ ), 94% ee for *S* enantiomer];  $^1H$  NMR (400 MHz,  $CDCl_3$ ):  $\delta$  (ppm) 7.26-7.08 (m, 5H), 6.86-6.80 (m, 1H), 6.68-6.64 (m, 1H), 6.54 (d,  $J = 8.0$  Hz, 1H), 5.05 (q,  $J = 6.8$  Hz, 1H), 3.60 (s, br, 1H), 1.63 (d,  $J = 6.8$  Hz, 3H);  $^{13}C$  NMR (100

MHz, CDCl<sub>3</sub>):  $\delta$  (ppm) 157.7, 144.4, 138.2, 135.3, 129.0, 125.6, 124.6, 124.5, 121.9, 120.9, 119.1, 118.5, 50.1, 20.1.

The enantiomeric excess was determined by HPLC on a Chiralcel AD-H column (*n*-hexane : isopropanol = 90 : 10, flowing rate = 1.0 mL/min, 25 °C, UV detection at  $\lambda$  = 254 nm),  $t_{R1}$  = 7.7 min (minor),  $t_{R2}$  = 9.3 min (major).

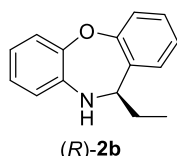

**(R)-11-ethyl-10,11-dihydrodibenzo[*b,f*][1,4]oxazepine:** (Known compound, see: K. Gao, C.-B. Yu, W. Li, Y.-G. Zhou, X. Zhang, *Chem. Commun.* **2011**, 47, 7845). Yellow oil, isolated yield 98%, 95% ee;

$[\alpha]_D^{25}$  = +23.0 (*c* = 1.0, CHCl<sub>3</sub>); <sup>1</sup>H NMR (300 MHz, CDCl<sub>3</sub>):  $\delta$  (ppm) 7.24-7.20 (m, 1H), 7.17-7.12 (m, 2H), 7.08-7.04 (m, 2H), 6.87-6.81 (m, 1H), 6.68-6.63 (m, 1H), 6.57-6.54 (m, 1H), 4.29 (t, *J* = 7.4 Hz, 1H), 3.99 (s, br, 1H), 2.11-2.03 (m, 2H), 1.01 (t, *J* = 7.5 Hz, 3H); <sup>13</sup>C NMR (75 MHz, CDCl<sub>3</sub>):  $\delta$  (ppm) 157.3, 144.1, 137.8, 134.2, 128.9, 127.3, 124.5, 124.3, 121.8, 121.2, 118.9, 118.7, 59.0, 28.0, 11.6.

The enantiomeric excess was determined by HPLC on a Chiralcel AD-H column (*n*-hexane : isopropanol = 90 : 10, flowing rate = 1.0 mL/min, 25 °C, UV detection at  $\lambda$  = 254 nm),  $t_{R1}$  = 7.2 min (minor),  $t_{R2}$  = 7.9 min (major).

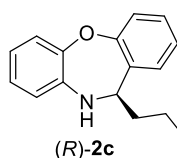

**(R)-11-propyl-10,11-dihydrodibenzo[*b,f*][1,4]oxazepine:** (Known compound, see: K. Gao, C.-B. Yu, W. Li, Y.-G. Zhou, X. Zhang, *Chem. Commun.* **2011**, 47, 7845). Yellow solid, isolated yield 97%, 93% ee;

$[\alpha]_D^{25}$  = +28.9 (*c* = 1.0, CHCl<sub>3</sub>); <sup>1</sup>H NMR (400 MHz, CDCl<sub>3</sub>):  $\delta$  (ppm) 7.24-7.04 (m, 5H), 6.86-6.82 (m, 1H), 6.67-6.63 (m, 1H), 6.54 (d, *J* = 7.6 Hz, 1H), 4.44 (t, *J* = 7.2 Hz, 1H), 2.06-1.99 (m, 2H), 1.54-1.32 (m, 2H), 0.96 (t, *J* = 7.6 Hz, 3H); <sup>13</sup>C NMR (100 MHz, CDCl<sub>3</sub>):  $\delta$  (ppm) 157.4, 144.0, 137.8, 134.4, 128.8, 127.1, 124.5, 124.3, 121.9, 121.2, 118.9, 118.6, 56.8, 37.0, 20.2, 14.1.

The enantiomeric excess was determined by HPLC on a Chiralcel AD-H column (*n*-hexane : isopropanol = 90 : 10, flowing rate = 1.0 mL/min, 25 °C, UV detection at  $\lambda$  = 254 nm),  $t_{R1}$  = 6.9 min (minor),  $t_{R2}$  = 7.7 min (major).

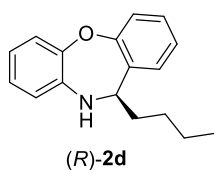

**(R)-11-butyl-10,11-dihydrodibenzo[*b,f*][1,4]oxazepine:** (New

compound). Yellow solid, isolated yield 93%, 95% ee;  $[\alpha]_{\text{D}}^{25} = -17.4$  ( $c = 1.0$ ,  $\text{CHCl}_3$ );  $^1\text{H NMR}$  (300 MHz,  $\text{CDCl}_3$ ):  $\delta$  (ppm)

7.25-7.03 (m, 5H), 6.87-6.82 (m, 1H), 6.69-6.64 (m, 1H), 6.57 (d,  $J$

= 7.8 Hz, 1H), 4.42 (t,  $J = 7.4$  Hz, 1H), 3.89 (s, br, 1H), 2.11-1.96 (m, 2H), 1.47-1.26

(m, 4H), 0.90 (t,  $J = 6.6$  Hz, 3H);  $^{13}\text{C NMR}$  (75 MHz,  $\text{CDCl}_3$ ):  $\delta$  (ppm) 157.3, 144.1,

137.6, 134.3, 128.9, 127.2, 124.5, 124.3, 121.9, 121.2, 119.1, 118.8, 57.2, 34.5, 29.2,

22.7, 14.2. HRMS-ESI exact mass calcd. for  $\text{C}_{15}\text{H}_{14}\text{NS}^+([\text{M}+\text{H}]^+)$  requires  $m/z$

254.15394, found  $m/z$  254.15403.

The enantiomeric excess was determined by HPLC on a Chiralcel AD-H column

(*n*-hexane : isopropanol = 90 : 10, flowing rate = 1.0 mL/min, 25 °C, UV detection at

$\lambda = 254$  nm),  $t_{\text{R}1} = 6.5$  min (minor),  $t_{\text{R}2} = 7.3$  min (major).

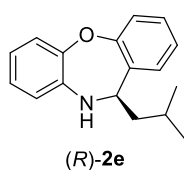

**(R)-11-isobutyl-10,11-dihydrodibenzo[*b,f*][1,4]oxazepine:** (New

compound). Yellow solid, isolated yield 95%, 98% ee;  $[\alpha]_{\text{D}}^{25} = -17.4$  ( $c = 1.0$ ,  $\text{CHCl}_3$ );  $^1\text{H NMR}$  (300 MHz,  $\text{CDCl}_3$ ):  $\delta$  (ppm) 7.25-7.03 (m,

5H), 6.87-6.82 (m, 1H), 6.69-6.64 (m, 1H), 6.52 (d,  $J = 7.8$  Hz, 1H),

4.55 (t,  $J = 7.5$  Hz, 1H), 3.76 (s, br, 1H), 1.94-1.89 (m, 2H), 1.75-1.64 (m, 1H),

0.97-0.94 (m, 6H);  $^{13}\text{C NMR}$  (75 MHz,  $\text{CDCl}_3$ ):  $\delta$  (ppm) 157.5, 143.9, 137.9, 134.6,

128.8, 126.9, 124.5, 124.3, 121.9, 121.2, 118.8, 118.6, 54.6, 43.7, 25.1, 23.1, 22.5.

HRMS-ESI exact mass calcd. for  $\text{C}_{15}\text{H}_{14}\text{NS}^+([\text{M}+\text{H}]^+)$  requires  $m/z$  254.15394, found

$m/z$  254.15466.

The enantiomeric excess was determined by HPLC on a Chiralcel AD-H column

(*n*-hexane : isopropanol = 90 : 10, flowing rate = 1.0 mL/min, 25 °C, UV detection at

$\lambda = 254$  nm),  $t_{\text{R}1} = 5.8$  min (minor),  $t_{\text{R}2} = 7.2$  min (major).

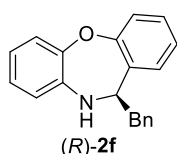

**(R)-11-benzyl-10,11-dihydrodibenzo[*b,f*][1,4]oxazepine:** (Known

compound, see: K. Gao, C.-B. Yu, W. Li, Y.-G. Zhou, X. Zhang, *Chem.*

*Commun.* **2011**, *47*, 7845). white solid, isolated yield 90%, 98% ee;

$[\alpha]_{\text{D}}^{25} = +70.7$  ( $c = 1.0$ ,  $\text{CHCl}_3$ );  $^1\text{H NMR}$  (300 MHz,  $\text{CDCl}_3$ ):  $\delta$  (ppm) 7.31-7.10 (m,

10H), 6.86-6.81 (m, 1H), 6.72-6.67 (m, 1H), 6.45 (d,  $J = 7.8$  Hz, 1H), 4.58-4.53 (m, 1H), 3.78 (s, br, 1H), 3.46-3.26 (m, 2H);  $^{13}\text{C}$  NMR (75 MHz,  $\text{CDCl}_3$ ):  $\delta$  (ppm) 157.2, 144.1, 138.8, 137.3, 133.5, 129.5, 129.2, 128.7, 127.7, 126.7, 124.5, 124.4, 121.9, 121.3, 119.3, 119.0, 59.5, 41.6.

The enantiomeric excess was determined by HPLC on a Chiralcel AD-H column (*n*-hexane : isopropanol = 90 : 10, flowing rate = 1.0 mL/min, 25 °C, UV detection at  $\lambda = 254$  nm),  $t_{\text{R}1} = 7.9$  min (minor),  $t_{\text{R}2} = 9.5$  min (major).

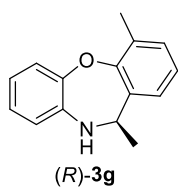

(*R*)-3g

**(*R*)-4,11-dimethyl-10,11-dihydrodibenzo[*b,f*][1,4]oxazepine:** (Known compound, see: K. Gao, C.-B. Yu, W. Li, Y.-G. Zhou, X. Zhang, *Chem. Commun.* **2011**, 47, 7845). Yellow oil, isolated yield 93%, 95% ee;  $[\alpha]_{\text{D}}^{25} = +78.6$  ( $c = 1.0$ ,  $\text{CHCl}_3$ );  $^1\text{H}$  NMR (400 MHz,  $\text{CDCl}_3$ ):  $\delta$  (ppm)

7.13-7.08 (m, 2H), 7.01-6.97 (m, 2H), 6.83-6.79 (m, 1H), 6.65-6.60 (m, 1H), 6.49-6.47 (m, 1H), 5.04 (q,  $J = 6.8$  Hz, 1H), 3.59 (s, 3H), 2.40 (s, 3H), 1.58 (d,  $J = 6.8$  Hz, 1H);  $^{13}\text{C}$  NMR (100 MHz,  $\text{CDCl}_3$ ):  $\delta$  (ppm) 155.8, 143.6, 138.7, 135.4, 130.4, 130.2, 124.6, 124.2, 122.7, 122.1, 118.6, 118.3, 49.5, 19.8, 16.3.

The enantiomeric excess was determined by HPLC on a Chiralcel AD-H column (*n*-hexane : isopropanol = 90 : 10, flowing rate = 1.0 mL/min, 25 °C, UV detection at  $\lambda = 254$  nm),  $t_{\text{R}1} = 6.1$  min (minor),  $t_{\text{R}2} = 6.5$  min (major).

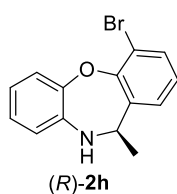

(*R*)-2h

**(*R*)-4-bromo-11-methyl-10,11-dihydrodibenzo[*b,f*][1,4]oxazepine:** (Known compound, see: K. Gao, C.-B. Yu, W. Li, Y.-G. Zhou, X. Zhang, *Chem. Commun.* **2011**, 47, 7845). Yellow oil, isolated yield 92%, 97% ee;  $[\alpha]_{\text{D}}^{25} = -29.9$  ( $c = 1.0$ ,  $\text{CHCl}_3$ );  $^1\text{H}$  NMR (400 MHz,  $\text{CDCl}_3$ ):  $\delta$  (ppm)

7.49 (d,  $J = 8.0$  Hz, 1H), 7.34 (d,  $J = 8.0$  Hz, 1H), 7.15 (d,  $J = 7.6$  Hz, 1H), 6.98 (t,  $J = 7.8$  Hz, 1H), 6.88 (t,  $J = 7.6$  Hz, 1H), 6.68 (t,  $J = 7.6$  Hz, 1H), 6.53 (d,  $J = 8.0$  Hz, 1H), 5.12 (q,  $J = 6.8$  Hz, 1H), 3.73 (s, br, 1H), 1.64 (d,  $J = 6.8$  Hz, 1H);  $^{13}\text{C}$  NMR (100 MHz,  $\text{CDCl}_3$ ):  $\delta$  (ppm) 154.3, 143.2, 138.2, 137.4, 132.5, 125.6, 125.2, 124.4, 122.9, 118.9, 118.1, 115.7, 49.7, 19.8.

The enantiomeric excess was determined by HPLC on a Chiralcel OD-H column

(*n*-hexane : isopropanol = 95 : 5, flowing rate = 1.0 mL/min, 25 °C, UV detection at  $\lambda = 254$  nm),  $t_{R1} = 9.1$  min (major),  $t_{R2} = 10.1$  min (minor).

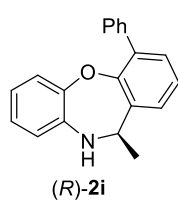

**(*R*)-11-methyl-4-phenyl-10,11-dihydrodibenzo[*b,f*][1,4]oxazepine:**

(Known compound, see: K. Gao, C.-B. Yu, W. Li, Y.-G. Zhou, X. Zhang, *Chem. Commun.* **2011**, 47, 7845). Yellow oil, isolated yield 97%, 96% ee;  $[\alpha]_D^{25} = -89.7$  ( $c = 1.0$ ,  $\text{CHCl}_3$ );  $^1\text{H NMR}$  (400 MHz,  $\text{CDCl}_3$ ):  $\delta$  (ppm) 7.54-7.52 (m, 2H), 7.47-7.37 (m, 3H), 7.31-7.30 (m, 1H), 7.25-7.15 (m, 2H), 6.80-6.76 (m, 1H), 6.50-6.49 (m, 3H), 5.17 (q,  $J = 6.8$  Hz, 1H), 3.72 (s, br, 1H), 1.68 (d,  $J = 6.8$  Hz, 1H);  $^{13}\text{C NMR}$  (100 MHz,  $\text{CDCl}_3$ ):  $\delta$  (ppm) 154.6, 144.0, 138.7, 138.1, 136.4, 135.0, 130.3, 130.1, 128.0, 127.4, 124.6, 124.5, 124.4, 122.2, 118.8, 118.1, 49.8, 19.8.

The enantiomeric excess was determined by HPLC on a Chiralcel OD-H column (*n*-hexane : isopropanol = 90 : 10, flowing rate = 1.0 mL/min, 25 °C, UV detection at  $\lambda = 254$  nm),  $t_{R1} = 6.5$  min (major),  $t_{R2} = 7.7$  min (minor).

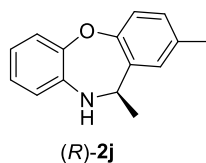

**(*R*)-2,11-dimethyl-10,11-dihydrodibenzo[*b,f*][1,4]oxazepine:**

(Known compound, see: K. Gao, C.-B. Yu, W. Li, Y.-G. Zhou, X. Zhang, *Chem. Commun.* **2011**, 47, 7845). Yellow oil, isolated yield 96%, 95% ee;  $[\alpha]_D^{25} = +49.2$  ( $c = 1.0$ ,  $\text{CHCl}_3$ );  $^1\text{H NMR}$  (400 MHz,  $\text{CDCl}_3$ ):  $\delta$  (ppm) 7.09-7.01 (m, 4H), 6.86-6.82 (m, 1H), 6.68-6.64 (m, 1H), 6.54-6.52 (m, 1H), 5.03 (q,  $J = 6.8$  Hz, 1H), 3.72 (s, 1H), 2.32 (s, 3H), 1.64 (d,  $J = 6.8$  Hz, 1H);  $^{13}\text{C NMR}$  (100 MHz,  $\text{CDCl}_3$ ):  $\delta$  (ppm) 155.5, 144.6, 138.3, 134.8, 134.0, 129.3, 125.9, 124.5, 121.8, 120.6, 119.0, 118.5, 50.0, 21.1, 20.1.

The enantiomeric excess was determined by HPLC on a Chiralcel AD-H column (*n*-hexane : isopropanol = 90 : 10, flowing rate = 1.0 mL/min, 25 °C, UV detection at  $\lambda = 254$  nm),  $t_{R1} = 5.5$  min (major),  $t_{R2} = 6.1$  min (minor).

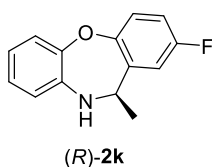

**(*R*)-2-fluoro-11-methyl-10,11-dihydrodibenzo[*b,f*][1,4]oxazepine:**

(Known compound, see: K. Gao, C.-B. Yu, W. Li, Y.-G. Zhou, X. Zhang, *Chem. Commun.* **2011**, 47, 7845). Yellow solid, isolated yield 94%, 95% ee;  $[\alpha]_{\text{D}}^{25} = +60.1$  ( $c = 1.0$ ,  $\text{CHCl}_3$ );  $^1\text{H NMR}$  (400 MHz,  $\text{CDCl}_3$ ):  $\delta$  (ppm) 7.14-7.07 (m, 2H), 6.94-6.84 (m, 3H), 6.69-6.65 (m, 1H), 6.55-6.53 (m, 1H), 5.07 (q,  $J = 6.8$  Hz, 1H), 3.69 (s, br, 1H), 1.62 (d,  $J = 6.8$  Hz, 1H);  $^{13}\text{C NMR}$  (100 MHz,  $\text{CDCl}_3$ ):  $\delta$  (ppm) 159.4 (d,  $J_{\text{C-F}} = 241.0$  Hz), 153.7, 144.3, 138.1, 137.1 (d,  $J_{\text{C-F}} = 7.0$  Hz), 124.9, 122.1 (d,  $J_{\text{C-F}} = 8.0$  Hz), 121.8, 119.2, 118.5, 115.0 (d,  $J_{\text{C-F}} = 23.0$  Hz), 112.1 (d,  $J_{\text{C-F}} = 24.0$  Hz), 49.3, 19.6.

The enantiomeric excess was determined by HPLC on a Chiralcel OD-H column (*n*-hexane : isopropanol = 90 : 10, flowing rate = 0.8 mL/min, 25 °C, UV detection at  $\lambda = 254$  nm),  $t_{\text{R}1} = 6.2$  min (major),  $t_{\text{R}2} = 7.2$  min (minor).

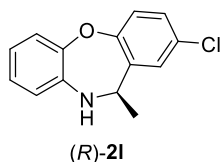

**(R)-2-chloro-11-methyl-10,11-dihydrobenzo[*b,f*][1,4]oxazepine:**

(New compound). Yellow oil, isolated yield 95%, 96% ee;  $[\alpha]_{\text{D}}^{25} = +77.5$  ( $c = 1.0$ ,  $\text{CHCl}_3$ );  $^1\text{H NMR}$  (400 MHz,  $\text{CDCl}_3$ ):  $\delta$  (ppm)

7.22-7.18 (m, 2H), 7.11-7.07 (m, 2H), 6.89-6.85 (m, 1H), 6.70-6.66 (m, 1H), 6.54 (d,  $J = 8.0$  Hz, 1H), 5.03 (q,  $J = 6.8$  Hz, 1H), 3.70 (s, br, 1H), 1.62 (d,  $J = 6.8$  Hz, 1H);  $^{13}\text{C NMR}$  (100 MHz,  $\text{CDCl}_3$ ):  $\delta$  (ppm) 156.1, 144.1, 137.9, 136.9, 129.5, 128.7, 125.6, 124.9, 122.4, 121.8, 119.3, 118.6, 49.7, 19.8. HRMS-ESI exact mass calcd. for  $\text{C}_{15}\text{H}_{14}\text{NS}^+([\text{M}+\text{H}]^+)$  requires  $m/z$  246.06802, found  $m/z$  246.06845.

The enantiomeric excess was determined by HPLC on a Chiralcel OD-H column (*n*-hexane : isopropanol = 90 : 10, flowing rate = 0.8 mL/min, 25 °C, UV detection at  $\lambda = 254$  nm),  $t_{\text{R}1} = 7.8$  min (major),  $t_{\text{R}2} = 9.3$  min (minor).

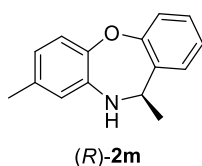

**(R)-8,11-dimethyl-10,11-dihydrobenzo[*b,f*][1,4]oxazepine:** (New

compound). Yellow oil, isolated yield 93%, 96% ee;  $[\alpha]_{\text{D}}^{25} = +14.6$  ( $c = 1.0$ ,  $\text{CHCl}_3$ );  $^1\text{H NMR}$  (400 MHz,  $\text{CDCl}_3$ ):  $\delta$  (ppm) 7.25-7.07 (m, 4H), 6.98 (d,  $J = 8.0$  Hz, 1H), 6.46 (d,  $J = 8.0$  Hz, 1H), 6.35 (s, 1H),

5.03 (q,  $J = 6.8$  Hz, 1H), 2.17 (s, 3H), 1.63 (d,  $J = 6.8$  Hz, 1H);  $^{13}\text{C NMR}$  (100 MHz,  $\text{CDCl}_3$ ):  $\delta$  (ppm) 157.9, 142.5, 137.7, 135.3, 134.2, 128.9, 125.4, 124.5, 121.6, 120.8,



119.8, 118.9, 50.0, 20.8, 20.1. HRMS-ESI exact mass calcd. for C<sub>15</sub>H<sub>14</sub>NS<sup>+</sup>([M+H]<sup>+</sup>) requires m/z 226.12264, found m/z 226.12300.

The enantiomeric excess was determined by HPLC on a Chiralcel AD-H column (*n*-hexane : isopropanol = 90 : 10, flowing rate = 0.8 mL/min, 25 °C, UV detection at λ = 254 nm), t<sub>R1</sub> = 9.7 min (minor), t<sub>R2</sub> = 11.2 min (major).

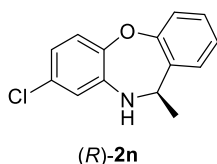

**(R)-8-chloro-11-methyl-10,11-dihydrodibenzo[*b,f*][1,4]oxazepine:**

(Known compound, see: P. Li, Y. Huang, X. Hu, X.-Q. Dong, X.

Zhang, *Org. Lett.* **2017**, *19*, 3855). Yellow solid, isolated yield 96%,

97% ee; [α]<sub>D</sub><sup>25</sup> = +23.5 (*c* = 1.0, CHCl<sub>3</sub>); <sup>1</sup>H NMR (400 MHz, CDCl<sub>3</sub>): δ (ppm) 7.28-7.24 (m, 1H), 7.20-7.18 (m, 1H), 7.15-7.10 (m, 2H), 6.99 (d, *J* = 8.4 Hz, 1H), 6.59-6.56 (m, 1H), 6.49 (s, 1H), 5.03 (q, *J* = 6.8 Hz, 1H), 3.79 (s, 1H), 1.63 (d, *J* = 6.8 Hz, 1H); <sup>13</sup>C NMR (100 MHz, CDCl<sub>3</sub>): δ (ppm) 157.5, 142.8, 139.4, 135.0, 129.5, 129.2, 125.4, 124.8, 123.0, 120.8, 118.4, 117.5, 49.8, 20.0.

The enantiomeric excess was determined by HPLC on a Chiralcel AD-H column (*n*-hexane : isopropanol = 90 : 10, flowing rate = 1.0 mL/min, 25 °C, UV detection at λ = 254 nm), t<sub>R1</sub> = 7.7 min (minor), t<sub>R2</sub> = 11.6 min (major).

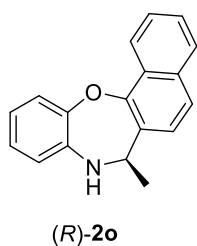

**(R)-7-methyl-7,8-dihydrobenzo[*b*]naphtho[2,1-*f*][1,4]oxazepine:**

(Known compound, see: P. Li, Y. Huang, X. Hu, X.-Q. Dong, X.

Zhang, *Org. Lett.* **2017**, *19*, 3855). Yellow oil, isolated yield 97%,

95% ee; [α]<sub>D</sub><sup>25</sup> = -89.7 (*c* = 1.0, CHCl<sub>3</sub>); <sup>1</sup>H NMR (400 MHz,

CDCl<sub>3</sub>): δ (ppm) 8.47 (d, *J* = 8.4 Hz, 1H), 7.82 (d, *J* = 8.0 Hz, 1H),

7.63-7.47 (m, 3H), 7.36-7.34 (m, 2H), 6.89-6.86 (m, 1H), 6.74-6.70 (m, 1H), 6.60-6.58 (m, 1H), 5.21 (q, *J* = 6.8 Hz, 1H), 3.76 (s, br, 1H), 1.74 (d, *J* = 6.8 Hz, 1H); <sup>13</sup>C NMR (100 MHz, CDCl<sub>3</sub>): δ (ppm) 152.6, 144.4, 138.8, 134.3, 130.2, 127.8, 127.4, 126.4, 126.3, 124.8, 124.0, 123.4, 122.2, 122.0, 119.2, 118.9, 50.5, 20.6.

The enantiomeric excess was determined by HPLC on a Chiralcel AD-H column (*n*-hexane : isopropanol = 90 : 10, flowing rate = 0.8 mL/min, 25 °C, UV detection at λ = 254 nm), t<sub>R1</sub> = 12.9 min (major), t<sub>R2</sub> = 18.9 min (minor).

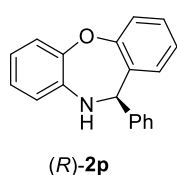

**(R)-11-phenyl-10,11-dihydrodibenzo[*b,f*][1,4]oxazepine:** (Known compound, see: K. Gao, C.-B. Yu, W. Li, Y.-G. Zhou, X. Zhang, *Chem. Commun.* **2011**, 47, 7845). Yellow oil, isolated yield 95%, 62% ee;  $[\alpha]_D^{25} = -15.7$  ( $c = 1.0$ ,  $\text{CHCl}_3$ );  $^1\text{H NMR}$  (400 MHz,  $\text{CDCl}_3$ ):  $\delta$  (ppm)

7.47-7.35 (m, 5H), 7.31-7.27 (m, 1H), 7.24-7.22 (m, 1H), 7.16-7.13 (m, 1H), 7.09-7.05 (m, 1H), 6.95-6.91 (m, 2H), 6.77-6.73 (m, 1H), 6.69-6.66 (m, 1H), 5.94 (s, 1H), 4.12 (s, br, 1H);  $^{13}\text{C NMR}$  (100 MHz,  $\text{CDCl}_3$ ):  $\delta$  (ppm) 157.6, 144.9, 141.2, 138.3, 134.4, 129.3, 128.8, 128.6, 127.8, 127.4, 124.8, 124.3, 122.0, 121.3, 119.6, 118.8, 60.5.

The enantiomeric excess was determined by HPLC on a Chiralcel AD-H column (*n*-hexane : isopropanol = 90 : 10, flowing rate = 0.8 mL/min, 25 °C, UV detection at  $\lambda = 254$  nm),  $t_{R1} = 7.0$  min (minor),  $t_{R2} = 9.2$  min (major).

### Procedure B (for dihydrodibenzo[*b,f*][1,4]thiazepines)

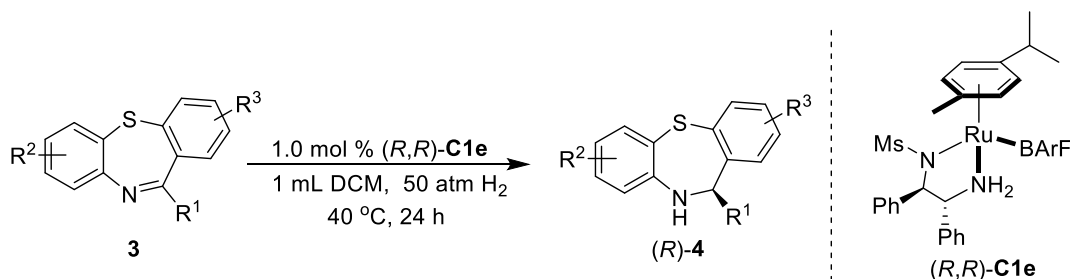

**General procedure:** A 30 mL glass-lined stainless-steel reactor equipped with a magnetic stirrer bar was charged with substrate dibenzo[*b,f*][1,4]thiazepine (0.2 mmol), Ru-catalyst (*R,R*)-C1e (0.002 mmol) in 1 mL of DCM under N<sub>2</sub> atmosphere in a glove box. The autoclave was closed, and the final pressure of the hydrogen gas was adjusted to 50 atm after purging the autoclave with hydrogen gas three times. The reaction mixture was stirred at room temperature for 24 h. Then the hydrogen gas was carefully released. The conversion was determined by  $^1\text{H NMR}$  spectroscopy of the crude reaction mixture. The reaction mixture was filtered through a short pad of silica eluted with EA and PET to give isolated product dihydrodibenzo[*b,f*][1,4]thiazepine, and the enantiomeric excess of the product was determined by HPLC with a chiral

column.

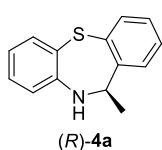

**(R)-11-methyl-10,11-dihydrodibenzo[*b,f*][1,4]thiazepine:** (Known compound, see: J. Wang, *Tetrahedron Lett.* **2013**, *54*, 5956). Colorless oil; isolated yield 98%, 99% ee;  $[\alpha]_{\text{D}}^{25} = -102.4$  ( $c = 0.5$ ,  $\text{CH}_2\text{Cl}_2$ ), [Lit.<sup>5</sup>  $[\alpha]_{\text{D}}^{20} = -87.1$  ( $c = 0.48$ ,  $\text{CHCl}_3$ ), 92% ee for *R* enantiomer];  $^1\text{H}$  NMR (400 MHz,  $\text{CD}_2\text{Cl}_2$ ):  $\delta$  (ppm) 7.54 (d,  $J = 7.6$  Hz, 1H), 7.38-7.31 (m, 2H), 7.29-7.25 (m, 1H), 7.14-7.12 (m, 1H), 6.92-6.87 (m, 1H), 6.54-6.51 (m, 1H), 6.35 (d,  $J = 8.0$  Hz, 1H), 6.15-6.12 (m, 1H), 3.74 (s, br, 1H), 1.62-1.60 (m, 3H);  $^{13}\text{C}$  NMR (100 MHz,  $\text{CD}_2\text{Cl}_2$ ):  $\delta$  (ppm) 147.1, 146.2, 136.7, 132.5, 132.1, 129.2, 128.7, 128.5, 124.5, 118.3, 117.8, 116.0, 50.4, 19.7.

The enantiomeric excess was determined by HPLC on a Chiralcel AD-H column (*n*-hexane : isopropanol = 95 : 5, flowing rate = 1.0 mL/min, 25 °C, UV detection at  $\lambda = 220$  nm),  $t_{\text{R}1} = 8.6$  min (minor),  $t_{\text{R}2} = 9.3$  min (major).

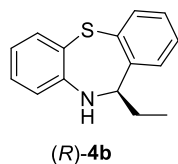

**(R)-11-ethyl-10,11-dihydrodibenzo[*b,f*][1,4]thiazepine:** (Known compound, see: J. Wang, *Tetrahedron Lett.* **2013**, *54*, 5956). Colorless oil; isolated yield 97%, 95% ee;  $[\alpha]_{\text{D}}^{25} = -40.2$  ( $c = 0.5$ ,  $\text{CH}_2\text{Cl}_2$ );  $^1\text{H}$  NMR (400 MHz,  $\text{CD}_2\text{Cl}_2$ ):  $\delta$  (ppm) 7.54 (d,  $J = 7.6$  Hz, 1H), 7.37-7.33 (m, 1H), 7.27-7.24 (m, 2H), 7.13 (d,  $J = 7.6$  Hz, 1H), 6.92-6.88 (m, 1H), 6.53 (t,  $J = 7.6$  Hz, 1H), 6.38 (d,  $J = 8.0$  Hz, 1H), 5.73 (t,  $J = 7.2$  Hz, 1H), 3.68 (s, br, 1H), 2.15-2.04 (m, 1H), 1.99-1.88 (m, 1H), 1.13 (t,  $J = 7.2$  Hz, 3H);  $^{13}\text{C}$  NMR (100 MHz,  $\text{CD}_2\text{Cl}_2$ ):  $\delta$  (ppm) 147.2, 145.4, 136.7, 132.4, 132.2, 129.1, 128.6, 128.3, 125.2, 118.3, 118.0, 116.3, 57.3, 26.9, 11.7.

The enantiomeric excess was determined by HPLC on a Chiralpak AD-H column (*n*-hexane : isopropanol = 95 : 5, flowing rate = 1.0 mL/min, 25 °C, UV detection at  $\lambda = 220$ nm),  $t_{\text{R}1} = 7.4$  min (major),  $t_{\text{R}2} = 8.5$  min (minor).

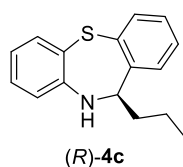

**(R)-11-propyl-10,11-dihydrodibenzo[*b,f*][1,4]thiazepine:** (Known

compound, see: J. Wang, *Tetrahedron Lett.* **2013**, *54*, 5956). Colorless oil; isolated yield 99%, 93% ee;  $[\alpha]_{\text{D}}^{25} = -34.4$  ( $c = 0.5$ ,  $\text{CH}_2\text{Cl}_2$ );  $^1\text{H}$  NMR (400 MHz,  $\text{CDCl}_3$ ):  $\delta$  (ppm) 7.54-7.51 (m, 1H), 7.30-7.28 (m, 1H), 7.23-7.19 (m, 2H), 7.14-7.12 (m, 1H), 6.89-6.85 (m, 1H), 6.54-6.50 (m, 1H), 6.34-6.32 (m, 1H), 5.87-5.84 (m, 1H), 3.59 (s, br, 1H), 2.00-1.84 (m, 2H), 1.58-1.52 (m, 2H), 1.02 (t,  $J = 7.2$  Hz, 3H);  $^{13}\text{C}$  NMR (100 MHz,  $\text{CDCl}_3$ ):  $\delta$  (ppm) 146.8, 145.3, 136.4, 132.2, 132.1, 128.8, 128.2, 128.1, 124.7, 118.2, 117.8, 116.1, 54.7, 35.8, 20.1, 14.2.

The enantiomeric excess was determined by HPLC on a Chiralcel AD-H column (*n*-hexane : isopropanol = 95 : 5, flowing rate = 1.0 mL/min, 25 °C, UV detection at  $\lambda = 220$  nm),  $t_{\text{R}1} = 6.2$  min (major),  $t_{\text{R}2} = 7.7$  min (minor).

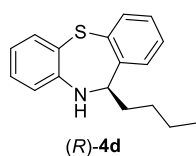

**(R)-11-butyl-10,11-dihydrodibenzo[*b,f*][1,4]thiazepine:** (New

compound). Colorless oil; isolated yield 97%, 91% ee;  $[\alpha]_{\text{D}}^{25} = -30.2$  ( $c = 0.5$ ,  $\text{CH}_2\text{Cl}_2$ );  $^1\text{H}$  NMR (400 MHz,  $\text{CD}_2\text{Cl}_2$ ):  $\delta$  (ppm) 7.54-7.52

(m, 1H), 7.37-7.23 (m, 3H), 7.13-7.10 (m, 1H), 6.91-6.87 (m, 1H), 6.54-6.50 (m, 1H), 6.38-6.35 (m, 1H), 5.85-5.82 (m, 1H), 3.72 (s, br, 1H), 2.08-2.01 (m, 1H), 1.93-1.88 (m, 1H), 1.58-1.42 (m, 4H), 0.98-0.95 (m, 3H);  $^{13}\text{C}$  NMR (100 MHz,  $\text{CD}_2\text{Cl}_2$ ):  $\delta$  (ppm) 147.2, 145.7, 136.7, 132.4, 132.2, 129.1, 128.6, 128.3, 125.2, 118.3, 117.9, 116.2, 55.4, 33.6, 29.4, 23.1, 14.2. HRMS-ESI exact mass calcd. for  $\text{C}_{17}\text{H}_{20}\text{NS}^+([\text{M}+\text{H}]^+)$  requires  $m/z$  270.13110, found  $m/z$  270.13125.

The enantiomeric excess was determined by HPLC on a Chiralcel AD-H column (*n*-hexane : isopropanol = 95 : 5, flowing rate = 1.0 mL/min, 25 °C, UV detection at  $\lambda = 220$  nm),  $t_{\text{R}1} = 6.8$  min (major),  $t_{\text{R}2} = 7.8$  min (minor).

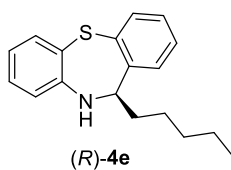

**(R)-11-pentyl-10,11-dihydrodibenzo[*b,f*][1,4]thiazepine:** (Known

compound, see: J. Wang, *Tetrahedron Lett.* **2013**, *54*, 5956).

Colorless oil; isolated yield 98%, 90% ee;  $[\alpha]_{\text{D}}^{25} = -29.5$  ( $c = 0.5$ ,  $\text{CH}_2\text{Cl}_2$ );  $^1\text{H}$  NMR (300 MHz,  $\text{CDCl}_3$ ):  $\delta$  (ppm) 7.55-7.52 (m, 1H),

7.38-7.23 (m, 3H), 7.13-7.10 (m, 1H), 6.92-6.87 (m, 1H), 6.55-6.50 (m, 2H), 6.38-6.35 (m, 1H), 5.86-5.83 (m, 1H), 3.72 (d,  $J = 4.8$  Hz, 1H), 2.06-1.88 (m, 2H),

1.59-1.35 (m, 6H), 0.93 (t,  $J = 6.9$  Hz, 3H);  $^{13}\text{C}$  NMR (125 MHz,  $\text{CDCl}_3$ ):  $\delta$  (ppm) 146.8, 145.4, 136.5, 132.2, 132.1, 128.8, 128.2, 128.0, 124.7, 118.3, 117.8, 116.3, 55.2, 33.8, 32.0, 26.7, 22.7, 14.2.

The enantiomeric excess was determined by HPLC on a Chiralcel AD-H column ( $n$ -hexane : isopropanol = 95 : 5, flowing rate = 1.0 mL/min, 25 °C, UV detection at  $\lambda = 220$  nm),  $t_{\text{R}1} = 5.5$  min (major),  $t_{\text{R}2} = 6.2$  min (minor).

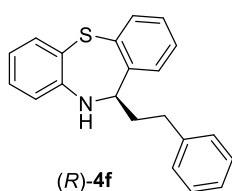

**(R)-11-phenethyl-10,11-dihydrodibenzo[*b,f*][1,4]thiazepine:**

(Known compound, see: J. Wang, *Tetrahedron Lett.* **2013**, 54, 5956). Colorless oil; isolated yield 97%, 85% ee;  $[\alpha]_{\text{D}}^{25} = -14.6$  ( $c = 0.5$ ,  $\text{CH}_2\text{Cl}_2$ );  $^1\text{H}$  NMR (400 MHz,  $\text{CDCl}_3$ ):  $\delta$  (ppm)

7.54-7.51 (m, 1H), 7.32-7.27 (m, 3H), 7.23-7.19 (m, 5H), 7.15-7.13 (m, 1H), 6.90-6.86 (m, 1H), 6.56-6.52 (m, 1H), 6.32-6.30 (m, 1H), 5.83-5.79 (m, 1H), 3.62 (s, 1H), 2.90-2.78 (m, 2H), 2.41-2.31 (m, 1H), 2.26-2.17 (m, 1H);  $^{13}\text{C}$  NMR (100 MHz,  $\text{CDCl}_3$ ):  $\delta$  (ppm) 146.5, 144.9, 141.6, 136.3, 132.2, 132.2, 128.8, 128.7, 128.6, 128.2, 128.2, 126.3, 124.9, 118.4, 118.1, 116.4, 55.1, 35.6, 33.3.

The enantiomeric excess was determined by HPLC on a Chiralcel AD-H column ( $n$ -hexane : isopropanol = 95 : 5, flowing rate = 1.0 mL/min, 25 °C, UV detection at  $\lambda = 220$  nm),  $t_{\text{R}1} = 9.1$  min (major),  $t_{\text{R}2} = 9.9$  min (minor).

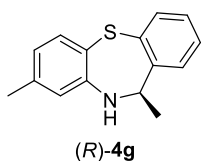

**(R)-8,11-dimethyl-10,11-dihydrodibenzo[*b,f*][1,4]thiazepine:**

(New compound). Light yellow oil; isolated yield 98%, 99% ee;  $[\alpha]_{\text{D}}^{25} = -127.3$  ( $c = 0.5$ ,  $\text{CH}_2\text{Cl}_2$ );  $^1\text{H}$  NMR (400 MHz,  $\text{CD}_2\text{Cl}_2$ ):  $\delta$

(ppm) 7.52 (d,  $J = 7.6$  Hz, 1H), 7.37-7.30 (m, 2H), 7.27-7.23 (m, 1H), 7.01 (d,  $J = 8.0$  Hz, 1H), 6.36 (d,  $J = 7.6$  Hz, 1H), 6.18 (s, 1H), 6.11 (q,  $J = 6.6$  Hz, 1H), 3.67 (s, 1H), 2.12 (s, 3H), 1.60 (d,  $J = 6.8$  Hz, 3H);  $^{13}\text{C}$  NMR (100 MHz,  $\text{CD}_2\text{Cl}_2$ ):  $\delta$  (ppm) 146.8, 146.2, 138.8, 137.0, 132.5, 132.0, 129.1, 128.4, 124.5, 119.4, 118.3, 112.8, 50.3, 21.0, 19.8. HRMS-ESI exact mass calcd. for  $\text{C}_{15}\text{H}_{16}\text{NS}^+ ([\text{M}+\text{H}]^+)$  requires  $m/z$  242.09980, found  $m/z$  242.09985.

The enantiomeric excess was determined by HPLC on a Chiralcel OJ-H column

(*n*-hexane : isopropanol = 70 : 30, flowing rate = 1.0 mL/min, 25 °C, UV detection at  $\lambda = 220$  nm),  $t_{R1} = 19.5$  min (major),  $t_{R2} = 23.2$  min (minor).

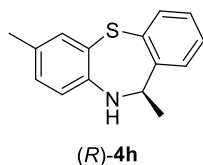

**(*R*)-7,11-dimethyl-10,11-dihydrodibenzo[*b,f*][1,4]thiazepine:**

(Known compound, see: J. Wang, *Tetrahedron Lett.* **2013**, *54*, 5956). Light yellow oil; isolated yield 97%, 99% ee;  $[\alpha]_D^{25} = -17.4$  ( $c = 0.5$ ,  $\text{CH}_2\text{Cl}_2$ );  $^1\text{H NMR}$  (400 MHz,  $\text{CD}_2\text{Cl}_2$ ):  $\delta$  (ppm) 7.52 (d,  $J = 7.6$  Hz, 1H), 7.36-7.23 (m, 3H), 6.96 (s, 1H), 6.72 (d,  $J = 8.4$  Hz, 1H), 6.29 (d,  $J = 8.0$  Hz, 1H), 6.03 (q,  $J = 6.8$  Hz, 1H), 3.64 (s, 1H), 2.13 (s, 3H), 1.59 (d,  $J = 6.8$  Hz, 3H);  $^{13}\text{C NMR}$  (100 MHz,  $\text{CD}_2\text{Cl}_2$ ):  $\delta$  (ppm) 146.2, 144.6, 136.6, 132.6, 132.0, 129.4, 129.1, 128.4, 128.0, 124.7, 118.1, 116.2, 50.6, 20.1, 19.9.

The enantiomeric excess was determined by HPLC on a Chiralcel AD-H column (*n*-hexane : isopropanol = 95 : 5, flowing rate = 1.0 mL/min, 25 °C, UV detection at  $\lambda = 220$  nm),  $t_{R1} = 10.1$  min (major),  $t_{R2} = 11.9$  min (minor).

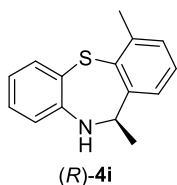

**(*R*)-4,11-dimethyl-10,11-dihydrodibenzo[*b,f*][1,4]thiazepine:**

(Known compound, see: J. Wang, *Tetrahedron Lett.* **2013**, *54*, 5956). Light yellow oil; isolated yield 99%, 98% ee;  $[\alpha]_D^{25} = -295.4$  ( $c = 0.5$ ,  $\text{CH}_2\text{Cl}_2$ );  $^1\text{H NMR}$  (400 MHz,  $\text{CDCl}_3$ ):  $\delta$  (ppm) 7.23-7.11 (m, 4H), 6.89-6.85 (m, 1H), 6.49 (t,  $J = 7.4$  Hz, 1H), 6.32-6.28 (m, 2H), 3.58 (s, 1H), 2.53 (s, 3H), 1.57 (d,  $J = 7.2$  Hz, 3H);  $^{13}\text{C NMR}$  (100 MHz,  $\text{CDCl}_3$ ):  $\delta$  (ppm) 147.1, 146.0, 139.9, 136.4, 133.3, 129.9, 128.6, 128.2, 121.6, 117.9, 117.3, 115.4, 50.0, 21.6, 20.0.

The enantiomeric excess was determined by HPLC on a Chiralcel OD-H column (*n*-hexane : isopropanol = 70 : 30, flowing rate = 0.7 mL/min, 25 °C, UV detection at  $\lambda = 220$  nm),  $t_{R1} = 6.5$  min (minor),  $t_{R2} = 7.7$  min (major).

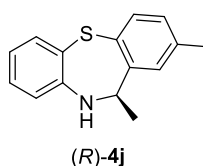

**(*R*)-2,11-dimethyl-10,11-dihydrodibenzo[*b,f*][1,4]thiazepine:**

(Known compound, see: J. Wang, *Tetrahedron Lett.* **2013**, *54*, 5956). Light yellow oil; isolated yield 97%, 99% ee;  $[\alpha]_D^{25} = -54.2$  ( $c = 0.5$ ,  $\text{CH}_2\text{Cl}_2$ );  $^1\text{H NMR}$  (400 MHz,  $\text{CD}_2\text{Cl}_2$ ):  $\delta$  (ppm) 7.41 (d,  $J = 7.6$  Hz, 1H),

7.14-7.07 (m, 3H), 6.88 (t,  $J = 7.6$  Hz, 1H), 6.50 (t,  $J = 7.4$  Hz, 1H), 6.33 (d,  $J = 8.4$  Hz, 1H), 6.13 (q,  $J = 6.6$  Hz, 1H), 3.70 (s, 1H), 2.36 (s, 3H), 1.59 (d,  $J = 6.8$  Hz, 3H);  $^{13}\text{C}$  NMR (100 MHz,  $\text{CD}_2\text{Cl}_2$ ):  $\delta$  (ppm) 147.1, 145.9, 136.4, 133.2, 132.4, 132.0, 129.0, 128.6, 125.3, 118.2, 117.7, 116.3, 50.2, 21.6, 16.7.

The enantiomeric excess was determined by HPLC on a Chiralcel AD-H column (*n*-hexane : isopropanol = 95 : 5, flowing rate = 1.0 mL/min, 25 °C, UV detection at  $\lambda = 220$  nm),  $t_{\text{R}1} = 7.6$  min (minor),  $t_{\text{R}2} = 8.0$  min (major).

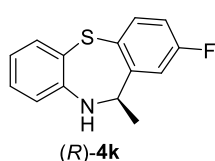

**(R)-2-fluoro-11-methyl-10,11-dihydrodibenzo[*b,f*][1,4]thiazepine** (Known compound, see: J. Wang, *Tetrahedron Lett.* **2013**, 54, 5956). Yellow oil; isolated yield 97%, 95% ee;  $[\alpha]_{\text{D}}^{25} = -75.2$  ( $c =$

0.5,  $\text{CH}_2\text{Cl}_2$ );  $^1\text{H}$  NMR (400 MHz,  $\text{CD}_2\text{Cl}_2$ ):  $\delta$  (ppm) 7.56-7.52 (m, 1H), 7.14-7.12 (m, 1H), 7.07-7.04 (m, 1H), 7.00-6.95 (m, 1H), 6.93-6.89 (m, 1H), 6.53 (t,  $J = 7.4$  Hz, 1H), 6.35 (d,  $J = 8.0$  Hz, 1H), 6.15 (q,  $J = 6.8$  Hz, 1H), 3.69 (s, 1H), 1.58 (d,  $J = 6.8$  Hz, 3H);  $^{13}\text{C}$  NMR (100 MHz,  $\text{CD}_2\text{Cl}_2$ ):  $\delta$  (ppm) 163.5 (d,  $J_{\text{C-F}} = 246.0$  Hz), 148.6 (d,  $J_{\text{C-F}} = 7.0$  Hz), 146.8, 134.5 (d,  $J_{\text{C-F}} = 8.0$  Hz), 132.5, 131.8 (d,  $J_{\text{C-F}} = 3.0$  Hz), 128.9, 118.4, 117.7, 115.7, 115.1 (d,  $J_{\text{C-F}} = 22.0$  Hz), 112.0 (d,  $J_{\text{C-F}} = 22.0$  Hz), 50.1 (d,  $J_{\text{C-F}} = 1.0$  Hz), 19.5.

The enantiomeric excess was determined by HPLC on a Chiralcel AD-H column (*n*-hexane : isopropanol = 95 : 5, flowing rate = 1.0 mL/min, 25 °C, UV detection at  $\lambda = 220$  nm),  $t_{\text{R}1} = 6.7$  min (major),  $t_{\text{R}2} = 8.7$  min (minor).

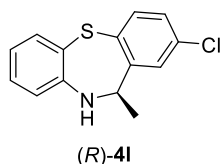

**(R)-2-chloro-11-methyl-10,11-dihydrodibenzo[*b,f*][1,4]thiazepine** (Known compound, see: J. Wang, *Tetrahedron Lett.* **2013**, 54, 5956). Light yellow oil; isolated yield 96%, 96% ee;  $[\alpha]_{\text{D}}^{25} = -50.4$

( $c = 0.5$ ,  $\text{CH}_2\text{Cl}_2$ );  $^1\text{H}$  NMR (400 MHz,  $\text{CD}_2\text{Cl}_2$ ):  $\delta$  (ppm) 7.48 (d,  $J = 8.4$  Hz, 1H), 7.30 (d,  $J = 2.4$  Hz, 1H), 7.26-7.23 (m, 1H), 7.12-7.10 (m, 1H), 6.93-6.88 (m, 1H), , 6.55-6.51 (m, 1H), 6.37-6.35 (m, 1H), 6.11 (q,  $J = 7.0$  Hz, 1H), 3.77 (s, 1H), 1.59 (d,  $J = 6.8$  Hz, 3H);  $^{13}\text{C}$  NMR (100 MHz,  $\text{CD}_2\text{Cl}_2$ ):  $\delta$  (ppm) 147.8, 146.8, 135.0, 134.9, 133.4, 132.5, 128.9, 128.4, 125.0, 118.6, 117.8, 115.4, 50.3, 19.6.

The enantiomeric excess was determined by HPLC on a Chiralcel AD-H column (*n*-hexane : isopropanol = 95 : 5, flowing rate = 1.0 mL/min, 25 °C, UV detection at  $\lambda = 220$  nm),  $t_{R1} = 6.9$  min (major),  $t_{R2} = 8.8$  min (minor).

### Procedure C (for dihydrodibenzo[*b,e*]azepines)

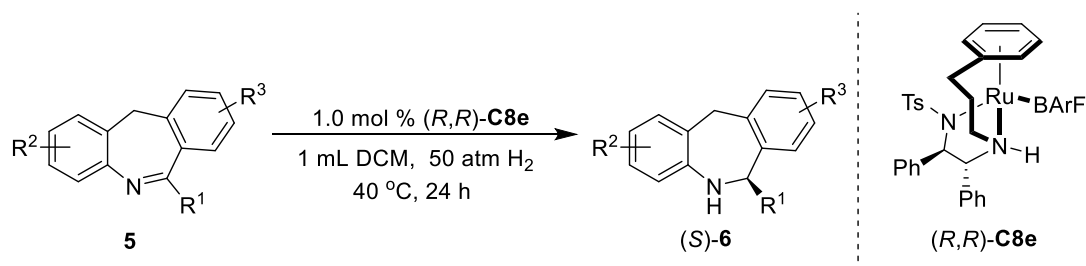

**General procedure:** A 30 mL glass-lined stainless-steel reactor equipped with a magnetic stirrer bar was charged with substrate dibenzo[*b,e*]azepine (0.2 mmol), Ru-catalyst (*R,R*)-**C8e** (0.002 mmol) in 1 mL of DCM under N<sub>2</sub> atmosphere in a glove box. The autoclave was closed, and the final pressure of the hydrogen gas was adjusted to 50 atm after purging the autoclave with hydrogen gas three times. The reaction mixture was stirred at room temperature for 24 h. Then the hydrogen gas was carefully released. The conversion was determined by <sup>1</sup>H NMR spectroscopy of the crude reaction mixture. The reaction mixture was filtered through a short pad of silica eluted with EA and PET to give isolated product dihydrodibenzo[*b,e*]azepine, and the enantiomeric excess of the product was determined by HPLC with a chiral column.

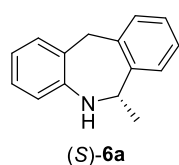

**(S)-6-methyl-6,11-dihydro-5H-dibenzo[*b,e*]azepine:** (Known compound, see: P. Li, Y. Huang, X. Hu, X.-Q. Dong, X. Zhang, *Org. Lett.* **2017**, *19*, 3855). Yellow oil, isolated yield 93%, 87% ee;  $[\alpha]_D^{25} =$

$-36.3$  ( $c = 1.0$ , CHCl<sub>3</sub>), [Lit.<sup>4</sup>  $[\alpha]_D^{25} = -30.0$  ( $c = 0.4$ , CHCl<sub>3</sub>), 97% ee for *S* enantiomer]; <sup>1</sup>H NMR (300 MHz, CDCl<sub>3</sub>):  $\delta$  (ppm) 7.22-7.21 (m, 4H), 6.98-6.90 (m, 2H), 6.62-6.57 (m, 1H), 6.40 (d,  $J = 8.1$  Hz, 1H), 5.20 (q,  $J = 6.6$  Hz, 1H), 4.81 (d,  $J = 15.0$  Hz, 1H), 3.57-3.52 (m, 2H), 1.60 (d,  $J = 6.6$  Hz, 3H); <sup>13</sup>C NMR (75 MHz, CDCl<sub>3</sub>):  $\delta$  (ppm) 145.7, 140.4, 139.7, 130.5, 128.2, 127.7, 127.6, 127.1, 123.7, 123.1, 118.2, 117.3, 49.8, 40.0, 20.2.



The enantiomeric excess was determined by HPLC on a Chiralcel AD-H column (*n*-hexane : isopropanol = 95 : 5, flowing rate = 1.0 mL/min, 25 °C, UV detection at  $\lambda = 220$  nm),  $t_{R1} = 6.8$  min (minor),  $t_{R2} = 8.9$  min (major).

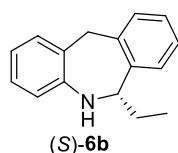

**(S)-6-ethyl-6,11-dihydro-5H-dibenzo[*b,e*]azepine:** (Known compound, see: P. Li, Y. Huang, X. Hu, X.-Q. Dong, X. Zhang, *Org. Lett.* **2017**, *19*, 3855). Yellow oil, isolated yield 95%, 88% ee;  $[\alpha]_D^{25} =$

$-116.6$  ( $c = 1.0$ ,  $\text{CHCl}_3$ );  $^1\text{H NMR}$  (400 MHz,  $\text{CDCl}_3$ ):  $\delta$  (ppm) 7.25-7.16 (m, 4H), 7.01-6.92 (m, 2H), 6.61 (t,  $J = 7.2$  Hz, 1H), 6.45 (d,  $J = 7.6$  Hz, 1H), 4.81-4.77 (m, 1H), 4.63 (d,  $J = 15.2$  Hz, 1H), 3.71 (d,  $J = 15.2$  Hz, 1H), 3.64 (s, 1H), 2.12-2.03 (m, 1H), 1.96-1.85 (m, 1H), 1.14 (t,  $J = 7.2$  Hz, 3H);  $^{13}\text{C NMR}$  (100 MHz,  $\text{CDCl}_3$ ):  $\delta$  (ppm) 145.8, 139.7, 139.7, 130.4, 128.4, 127.6, 127.6, 127.0, 124.7, 123.8, 118.3, 117.6, 57.1, 40.1, 27.7, 11.5.

The enantiomeric excess was determined by HPLC on a Chiralcel AD-H column (*n*-hexane : isopropanol = 95 : 5, flowing rate = 1.0 mL/min, 25 °C, UV detection at  $\lambda = 220$  nm),  $t_{R1} = 6.2$  min (minor),  $t_{R2} = 7.6$  min (major).

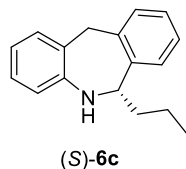

**(S)-6-propyl-6,11-dihydro-5H-dibenzo[*b,e*]azepine:** (New compound). Yellow solid, isolated yield 96%, 90% ee;  $[\alpha]_D^{25} = -108.4$  ( $c = 1.0$ ,  $\text{CHCl}_3$ );  $^1\text{H NMR}$  (400 MHz,  $\text{CDCl}_3$ ):  $\delta$  (ppm) 7.24-7.16 (m,

4H), 7.01-6.91 (m, 2H), 6.60 (t,  $J = 7.4$  Hz, 1H), 6.42 (d,  $J = 8.0$  Hz, 1H), 4.91-4.88 (m, 1H), 4.66 (d,  $J = 15.2$  Hz, 1H), 3.68 (d,  $J = 15.2$  Hz, 1H), 3.62 (s, 1H), 2.01-1.98 (m, 1H), 1.89-1.86 (m, 1H), 1.62-1.54 (m, 2H), 1.03 (t,  $J = 7.2$  Hz, 3H);  $^{13}\text{C NMR}$  (100 MHz,  $\text{CDCl}_3$ ):  $\delta$  (ppm) 145.8, 139.9, 139.7, 130.5, 128.4, 127.6, 127.6, 127.0, 124.5, 123.5, 118.2, 117.5, 54.9, 40.1, 36.8, 20.0, 14.3. HRMS-ESI exact mass calcd. for  $\text{C}_{17}\text{H}_{20}\text{N}^+([\text{M}+\text{H}]^+)$  requires  $m/z$  238.15903, found  $m/z$  238.15904.

The enantiomeric excess was determined by HPLC on a Chiralcel AD-H column (*n*-hexane : isopropanol = 95 : 5, flowing rate = 1.0 mL/min, 25 °C, UV detection at  $\lambda = 220$  nm),  $t_{R1} = 6.6$  min (minor),  $t_{R2} = 7.9$  min (major).

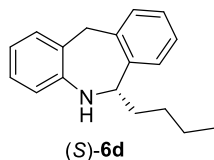

**(S)-6-butyl-6,11-dihydro-5H-dibenzo[b,e]azepine:** (New

compound). Yellow oil, isolated yield 95%, 88% ee;  $[\alpha]_D^{25} = -94.6$

( $c = 1.0$ ,  $\text{CHCl}_3$ );  $^1\text{H NMR}$  (400 MHz,  $\text{CDCl}_3$ ):  $\delta$  (ppm) 7.23-7.16

(m, 4H), 7.00-6.91 (m, 2H), 6.60 (t,  $J = 7.2$  Hz, 1H), 6.42 (d,  $J = 8.0$  Hz, 1H), 4.89-4.86 (m, 1H), 4.66 (d,  $J = 15.2$  Hz, 1H), 3.68 (d,  $J = 14.8$  Hz, 1H), 3.63 (s, 1H), 2.04-2.01 (m, 1H), 1.90-1.86 (m, 1H), 1.56-1.40 (m, 4H), 0.95 (t,  $J = 7.4$  Hz, 3H);  $^{13}\text{C NMR}$  (100 MHz,  $\text{CDCl}_3$ ):  $\delta$  (ppm) 145.8, 139.9, 139.7, 130.4, 128.4, 127.6, 127.5, 127.0, 124.5, 123.5, 118.2, 117.5, 55.2, 40.1, 34.3, 29.0, 22.9, 14.2. HRMS-ESI exact mass calcd. for  $\text{C}_{18}\text{H}_{22}\text{N}^+([\text{M}+\text{H}]^+)$  requires  $m/z$  252.17468, found  $m/z$  252.17474.

The enantiomeric excess was determined by HPLC on a Chiralcel AD-H column ( $n$ -hexane : isopropanol = 95 : 5, flowing rate = 1.0 mL/min, 25 °C, UV detection at  $\lambda = 220$  nm),  $t_{R1} = 6.0$  min (minor),  $t_{R2} = 7.2$  min (major).

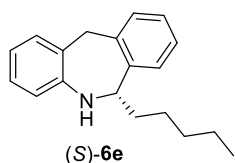

**(S)-6-pentyl-6,11-dihydro-5H-dibenzo[b,e]azepine:** (New

compound). Yellow oil, isolated yield 98%, 92% ee;  $[\alpha]_D^{25} =$

$-76.0$  ( $c = 1.0$ ,  $\text{CHCl}_3$ );  $^1\text{H NMR}$  (400 MHz,  $\text{CDCl}_3$ ):  $\delta$  (ppm)

7.23-7.16 (m, 4H), 7.00-6.91 (m, 2H), 6.62-6.58 (m, 1H), 6.43 (d,

$J = 7.6$  Hz, 1H), 4.89-4.86 (m, 1H), 4.66 (d,  $J = 14.8$  Hz, 1H), 3.68 (d,  $J = 14.8$  Hz, 1H), 2.03-1.82 (m, 2H), 1.56-1.37 (m, 6H), 0.91 (s, 3H);  $^{13}\text{C NMR}$  (100 MHz,  $\text{CDCl}_3$ ):  $\delta$  (ppm) 145.8, 139.9, 139.7, 130.4, 128.4, 127.6, 127.5, 127.0, 124.5, 123.5, 118.2, 117.5, 55.2, 40.1, 34.6, 32.0, 26.6, 22.8, 14.2. HRMS-ESI exact mass calcd. for  $\text{C}_{19}\text{H}_{24}\text{N}^+([\text{M}+\text{H}]^+)$  requires  $m/z$  266.19033, found  $m/z$  266.19040.

The enantiomeric excess was determined by HPLC on a Chiralcel AD-H column ( $n$ -hexane : isopropanol = 90 : 10, flowing rate = 1.0 mL/min, 25 °C, UV detection at  $\lambda = 254$  nm),  $t_{R1} = 6.3$  min (minor),  $t_{R2} = 7.0$  min (major).

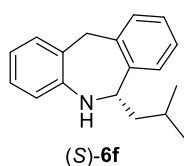

**(S)-6-isobutyl-6,11-dihydro-5H-dibenzo[b,e]azepine:** (New

compound). Yellow oil, isolated yield 94%, 94% ee;  $[\alpha]_D^{25} = -122.7$

( $c = 1.0$ ,  $\text{CHCl}_3$ );  $^1\text{H NMR}$  (400 MHz,  $\text{CDCl}_3$ ):  $\delta$  (ppm) 7.22-7.16 (m,

4H), 7.00 (d,  $J = 7.6$  Hz, 1H), 6.95-6.91 (m, 1H), 6.62-6.59 (m, 1H), 6.43 (d,  $J = 7.6$

Hz, 1H), 5.01-4.98 (m, 1H), 4.73 (d,  $J = 15.2$  Hz, 1H), 3.66 (d,  $J = 15.2$  Hz, 1H), 1.93-1.78 (m, 3H), 1.03-1.01 (m, 6H);  $^{13}\text{C}$  NMR (100 MHz,  $\text{CDCl}_3$ ):  $\delta$  (ppm) 145.5, 140.0, 139.7, 130.6, 128.4, 127.6, 127.0, 124.3, 123.2, 118.3, 117.6, 52.6, 43.5, 40.2, 24.9, 23.5, 22.4. HRMS-ESI exact mass calcd. for  $\text{C}_{18}\text{H}_{22}\text{N}^+([\text{M}+\text{H}]^+)$  requires  $m/z$  252.17468, found  $m/z$  252.17479.

The enantiomeric excess was determined by HPLC on a Chiralcel OD-H column (*n*-hexane : isopropanol = 90 : 10, flowing rate = 1.0 mL/min, 25 °C, UV detection at  $\lambda = 254$  nm),  $t_{\text{R}1} = 4.9$  min (minor),  $t_{\text{R}2} = 5.3$  min (major).

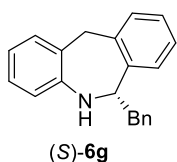

**(S)-6-benzyl-6,11-dihydro-5H-dibenzo[*b,e*]azepine:** (New compound). Yellow oil, isolated yield 98%, 91% ee;  $[\alpha]_{\text{D}}^{25} = -105.2$  ( $c = 1.0$ ,  $\text{CHCl}_3$ );  $^1\text{H}$  NMR (400 MHz,  $\text{CDCl}_3$ ):  $\delta$  (ppm) 7.37-7.19 (m,

9H), 7.01 (d,  $J = 7.2$  Hz, 1H), 6.90-6.88 (m, 2H), 6.65-6.63 (m, 1H), 6.36 (d,  $J = 8.0$  Hz, 1H), 5.14 (dd,  $J_1 = 22.2$  Hz,  $J_2 = 4.0$  Hz, 1H), 4.50 (d,  $J = 15.2$  Hz, 1H), 3.87 (d,  $J = 14.8$  Hz, 1H), 3.36-3.32 (m, 1H), 3.18-3.12 (m, 1H);  $^{13}\text{C}$  NMR (100 MHz,  $\text{CDCl}_3$ ):  $\delta$  (ppm) 145.7, 139.5, 139.5, 138.6, 130.1, 129.4, 128.9, 128.7, 127.8, 127.5, 127.1, 126.9, 125.7, 125.3, 119.0, 118.2, 57.4, 42.0, 40.1. HRMS-ESI exact mass calcd. for  $\text{C}_{21}\text{H}_{20}\text{N}^+([\text{M}+\text{H}]^+)$  requires  $m/z$  286.15903, found  $m/z$  286.15917.

The enantiomeric excess was determined by HPLC on a Chiralcel AD-H column (*n*-hexane : isopropanol = 95 : 5, flowing rate = 1.0 mL/min, 25 °C, UV detection at  $\lambda = 220$  nm),  $t_{\text{R}1} = 7.2$  min (minor),  $t_{\text{R}2} = 8.3$  min (major).

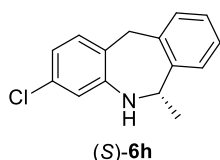

**(S)-3-chloro-6-methyl-6,11-dihydro-5H-dibenzo[*b,e*]azepine:** (Known compound, see: P. Li, Y. Huang, X. Hu, X.-Q. Dong, X. Zhang, *Org. Lett.* **2017**, *19*, 3855). Yellow solid, isolated yield

98%, 84% ee;  $[\alpha]_{\text{D}}^{25} = -16.2$  ( $c = 1.0$ ,  $\text{CHCl}_3$ );  $^1\text{H}$  NMR (400 MHz,  $\text{CDCl}_3$ ):  $\delta$  (ppm) 7.27-7.20 (m, 4H), 6.88 (d,  $J = 8.0$  Hz, 1H), 6.53 (d,  $J = 8.0$  Hz, 1H), 6.36 (s, 1H), 5.20 (d,  $J = 6.8$  Hz, 1H), 4.75 (d,  $J = 14.8$  Hz, 1H), 3.48 (d,  $J = 15.2$  Hz, 1H), 1.60 (d,  $J = 6.8$  Hz, 1H);  $^{13}\text{C}$  NMR (100 MHz,  $\text{CDCl}_3$ ):  $\delta$  (ppm) 146.6, 139.9, 139.3, 132.8, 131.5, 128.1, 128.0, 127.3, 127.1, 123.6, 121.1, 117.8, 116.5, 49.5, 39.4, 19.9.

The enantiomeric excess was determined by HPLC on a Chiralcel AS-H column (*n*-hexane : isopropanol = 95 : 5, flowing rate = 1.0 mL/min, 25 °C, UV detection at  $\lambda = 254$  nm),  $t_{R1} = 9.7$  min (major),  $t_{R2} = 10.8$  min (minor).

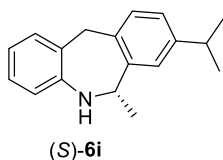

**(S)-8-isopropyl-6-methyl-6,11-dihydro-5H-dibenzo[*b,e*]azepine:**

(Known compound, see: P. Li, Y. Huang, X. Hu, X.-Q. Dong, X. Zhang, *Org. Lett.* **2017**, *19*, 3855). Yellow oil, isolated yield 98%,

76% ee;  $[\alpha]_D^{25} = -69.2$  ( $c = 1.0$ ,  $\text{CHCl}_3$ );  $^1\text{H}$  NMR (400 MHz,  $\text{CDCl}_3$ ):  $\delta$  (ppm) 7.15-7.13 (m, 1H), 7.07-7.06 (m, 2H), 6.99 (d,  $J = 7.2$  Hz, 1H), 6.94-6.91 (m, 1H), 6.62-6.58 (m, 1H), 6.43 (d,  $J = 8.0$  Hz, 1H), 5.18 (d,  $J = 6.4$  Hz, 1H), 4.76 (d,  $J = 11.2$  Hz, 1H), 3.55 (d,  $J = 11.2$  Hz, 1H), 2.89-2.84 (m, 1H), 1.62 (d,  $J = 6.4$  Hz, 3H), 1.23-1.22 (m, 6H);  $^{13}\text{C}$  NMR (100 MHz,  $\text{CDCl}_3$ ):  $\delta$  (ppm) 147.6, 145.6, 140.2, 137.0, 130.4, 128.3, 127.5, 125.4, 123.7, 122.1, 118.4, 117.5, 118.2, 50.1, 39.6, 34.2, 24.3, 24.2, 20.3.

The enantiomeric excess was determined by HPLC on a Chiralcel AD-H column (*n*-hexane : isopropanol = 90 : 10, flowing rate = 1.0 mL/min, 25 °C, UV detection at  $\lambda = 254$  nm),  $t_{R1} = 6.9$  min (minor),  $t_{R2} = 7.4$  min (major).

## 5. References

1. (a) K.-J. Haack, S. Hashiguchi, A. Fujii, T. Ikariya, R. Noyori, *Angew. Chem., Int. Ed.* **1997**, *36*, 285; (b) F. Chen, T. Wang, Z. Ding, Y. He, Z. Li, L. Xu, Q.-H. Fan, *Chem. Eur. J.* **2011**, *17*, 1109.
2. K. Gao, C.-B. Yu, W. Li, Y.-G. Zhou, X. Zhang, *Chem. Commun.* **2011**, *47*, 7845.
3. R.-N. Guo, K. Gao, Z.-S. Ye, L. Shi, Y. Li, Y.-G. Zhou, *Pure Appl. Chem.* **2013**, *85*, 843.
4. P. Li, Y. Huang, X. Hu, X.-Q. Dong, X. Zhang, *Org. Lett.* **2017**, *19*, 3855.
5. J. Wang, *Tetrahedron Lett.* **2013**, *54*, 5956.

## 6. Copy of NMR spectra

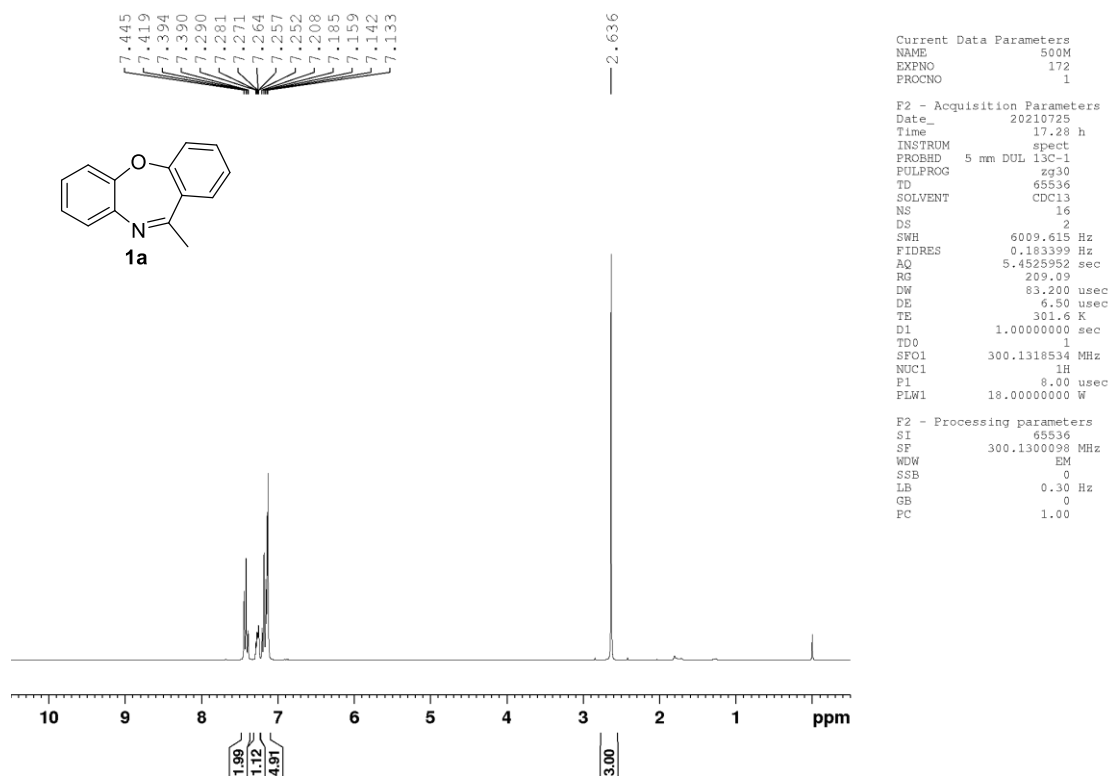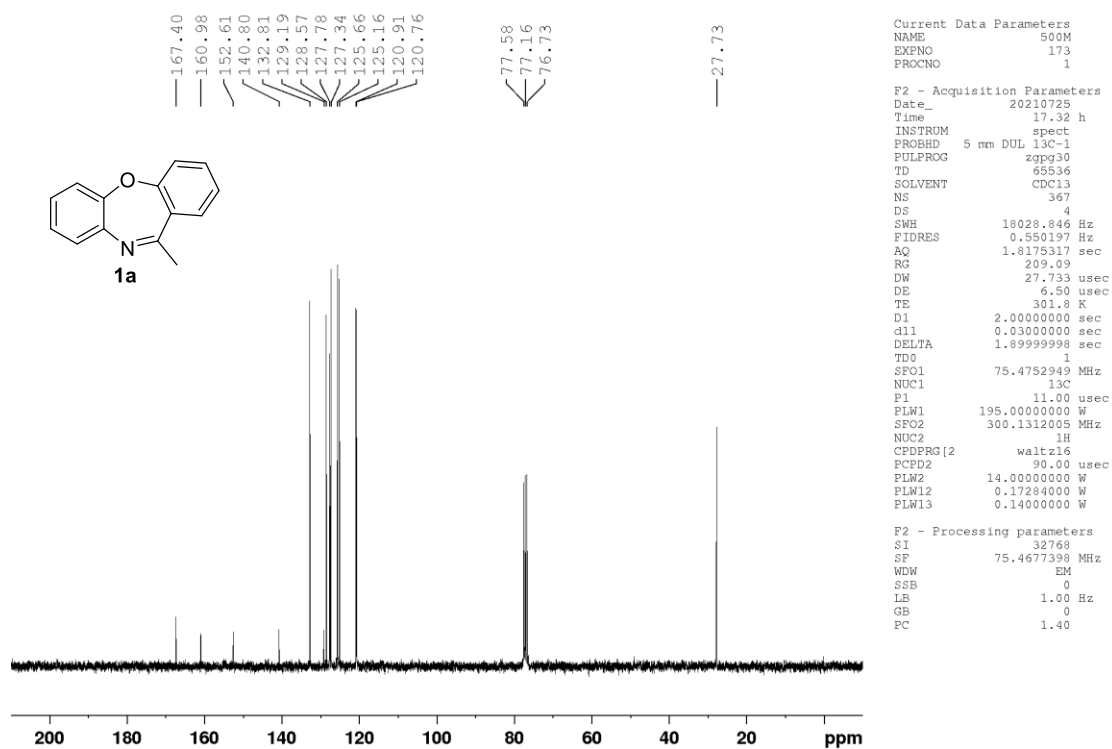

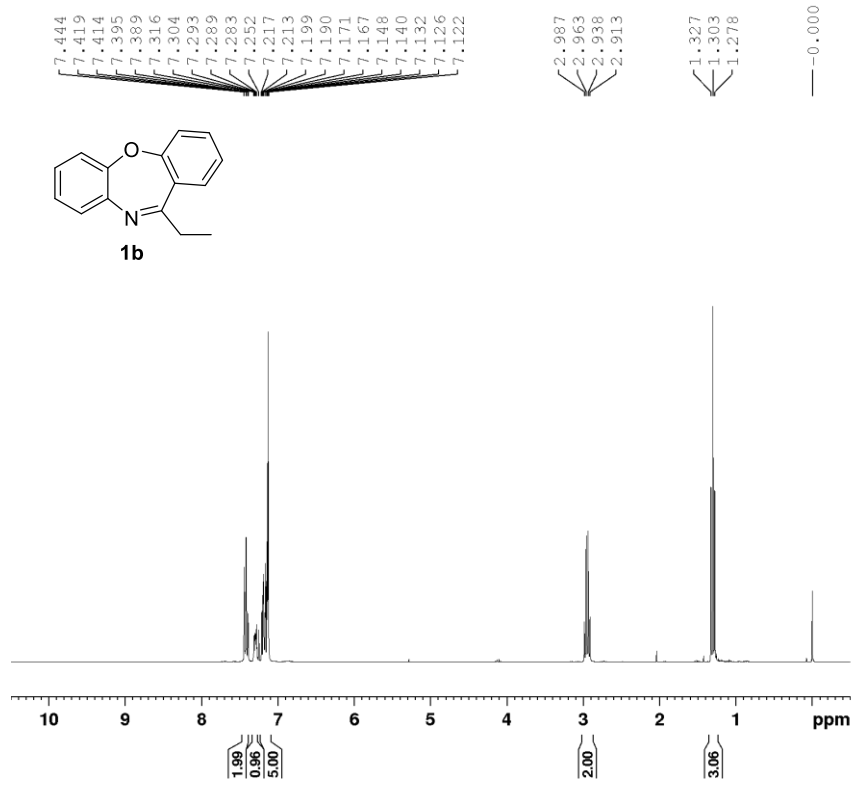

Current Data Parameters  
 NAME 500M  
 EXPNO 3  
 PROCNO 1

F2 - Acquisition Parameters  
 Date\_ 2021102  
 Time 9.02 h  
 INSTRUM spect  
 PROBHD 5 mm DUL 13C-1  
 PULPROG zg30  
 TD 65536  
 SOLVENT CDCl3  
 NS 16  
 DS 2  
 SWH 6009.615 Hz  
 FIDRES 0.183399 Hz  
 AQ 5.4525952 sec  
 RG 209.09  
 DW 83.200 usec  
 DE 6.50 usec  
 TE 297.6 K  
 D1 1.00000000 sec  
 SFO1 300.1318534 MHz  
 NUC1 1H  
 P1 8.00 usec  
 PLW1 18.00000000 W

F2 - Processing parameters  
 SI 65536  
 SF 300.1300096 MHz  
 WDW EM  
 SSB 0  
 LB 0.30 Hz  
 GB 0  
 PC 1.00

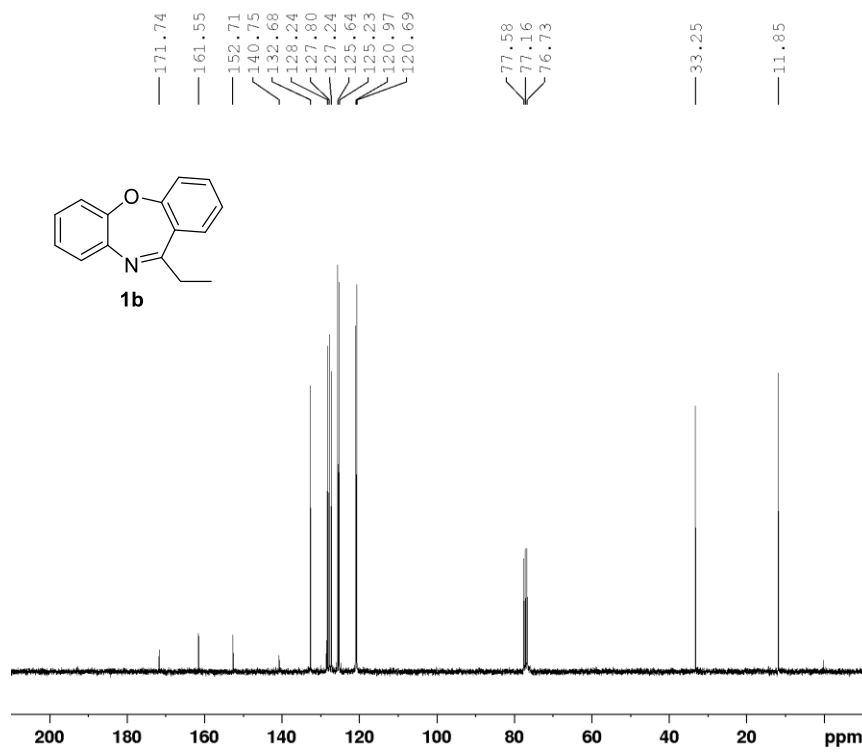

Current Data Parameters  
 NAME 500M  
 EXPNO 4  
 PROCNO 1

F2 - Acquisition Parameters  
 Date\_ 2021104  
 Time 3.16 h  
 INSTRUM spect  
 PROBHD 5 mm DUL 13C-1  
 PULPROG zgpg30  
 TD 65536  
 SOLVENT CDCl3  
 NS 1024  
 DS 4  
 SWH 18028.846 Hz  
 FIDRES 0.550197 Hz  
 AQ 1.8175317 sec  
 RG 209.09  
 DW 27.733 usec  
 DE 6.50 usec  
 TE 298.6 K  
 D1 2.00000000 sec  
 d11 0.03000000 sec  
 DELTA 1.89999998 sec  
 TD0 1  
 SFO1 75.4752949 MHz  
 NUC1 13C  
 P1 11.00 usec  
 PLW1 195.00000000 W  
 SFO2 300.1312005 MHz  
 NUC2 1H  
 CPDPRG [2] waltz16  
 PCED2 90.00 usec  
 PLN2 14.00000000 W  
 PLW12 0.17284000 W  
 PLW13 0.14000000 W

F2 - Processing parameters  
 SI 32768  
 SF 75.4677390 MHz  
 WDW EM  
 SSB 0  
 LB 1.00 Hz  
 GB 0  
 PC 1.40

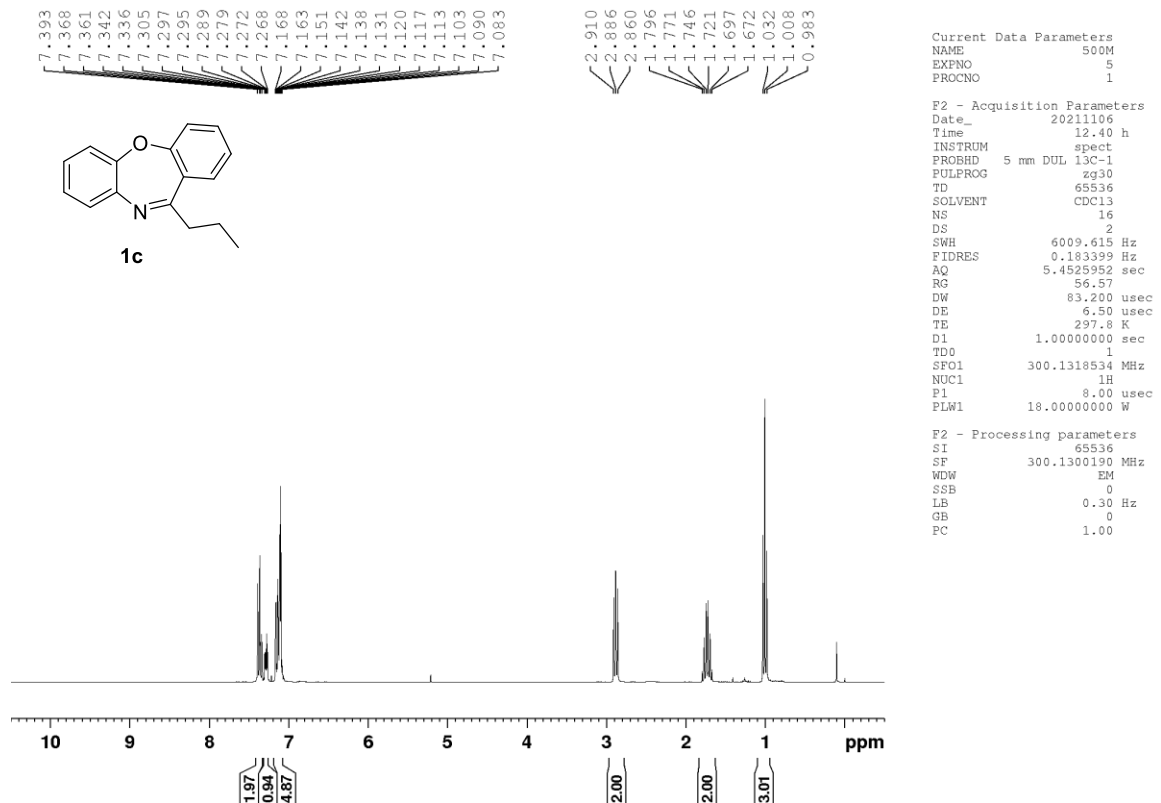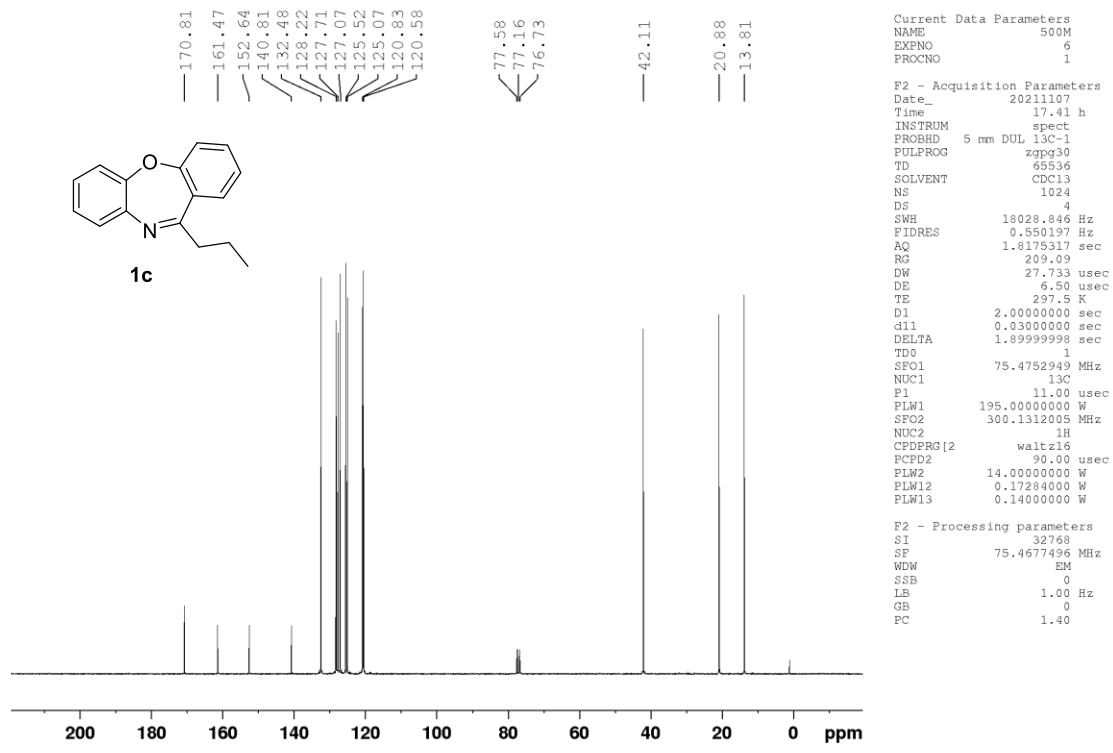



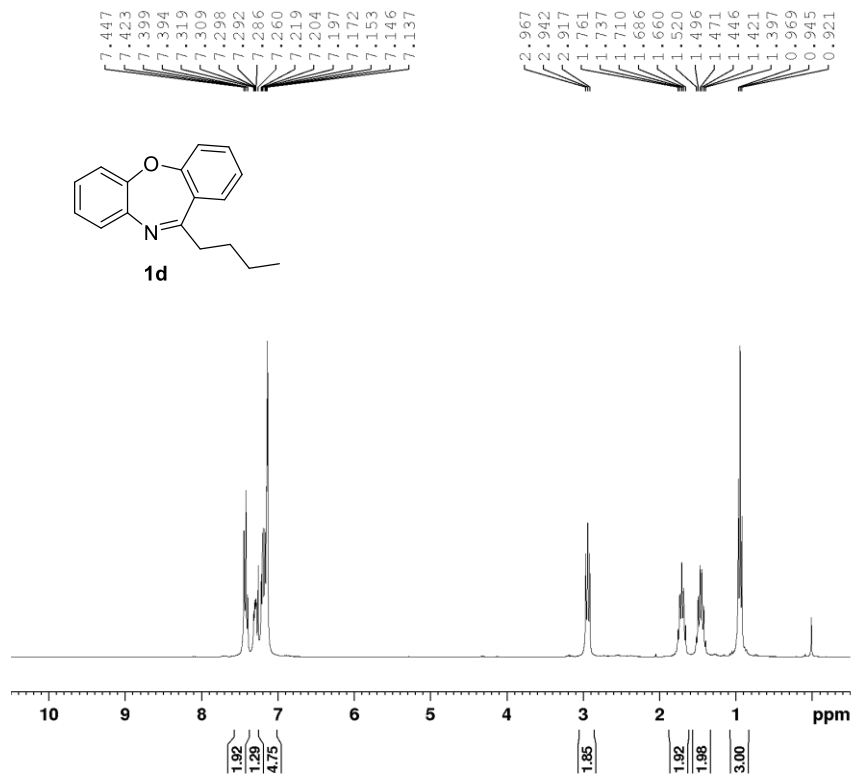

Current Data Parameters  
 NAME 500M  
 EXPNO 7  
 PROCNO 1

F2 - Acquisition Parameters  
 Date\_ 20220120  
 Time 0.34 h  
 INSTRUM spect  
 PROBHD 5 mm DUL 13C-1  
 PULPROG zg30  
 TD 65536  
 SOLVENT CDC13  
 NS 16  
 DS 2  
 SWH 6009.615 Hz  
 FIDRES 0.183399 Hz  
 AQ 5.4525952 sec  
 RG 126.88  
 DW 83.200 usec  
 DE 6.50 usec  
 TE 296.7 K  
 D1 1.0000000 sec  
 TD0 1  
 SFO1 300.1318534 MHz  
 NUC1 1H  
 P1 8.00 usec  
 PLW1 18.0000000 W

F2 - Processing parameters  
 SI 65536  
 SF 300.1300073 MHz  
 WDW EM  
 SSB 0  
 LB 0.30 Hz  
 GB 0  
 FC 1.00

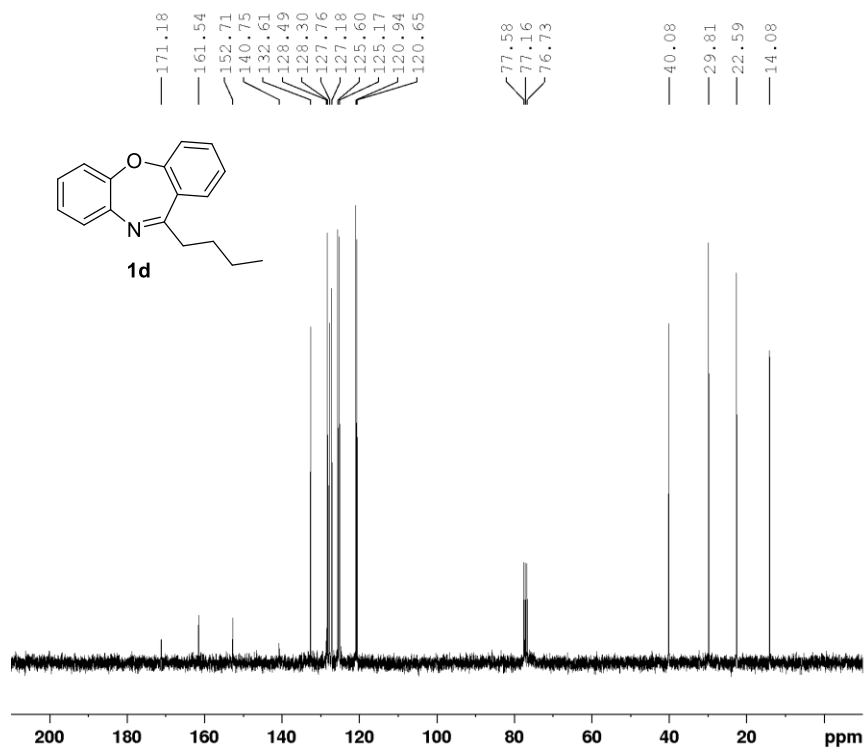

Current Data Parameters  
 NAME 500M  
 EXPNO 8  
 PROCNO 1

F2 - Acquisition Parameters  
 Date\_ 20220120  
 Time 0.51 h  
 INSTRUM spect  
 PROBHD 5 mm DUL 13C-1  
 PULPROG zgpg30  
 TD 65536  
 SOLVENT CDC13  
 NS 90  
 DS 4  
 SWH 18028.846 Hz  
 FIDRES 0.550197 Hz  
 AQ 1.8175317 sec  
 RG 209.09  
 DW 27.733 usec  
 DE 6.50 usec  
 TE 297.2 K  
 D1 2.0000000 sec  
 d11 0.0300000 sec  
 DELTA 1.89999999 sec  
 TD0 1  
 SFO1 75.4752949 MHz  
 NUC1 13C  
 P1 11.00 usec  
 PLW1 195.0000000 W  
 SFO2 300.1312005 MHz  
 NUC2 1H  
 CPDPRG [2] waltz16  
 PCD2 90.00 usec  
 PLN2 14.0000000 W  
 PLW12 0.1728400 W  
 PLW13 0.1400000 W

F2 - Processing parameters  
 SI 32758  
 SF 75.4677420 MHz  
 WDW EM  
 SSB 0  
 LB 1.00 Hz  
 GB 0  
 FC 1.40

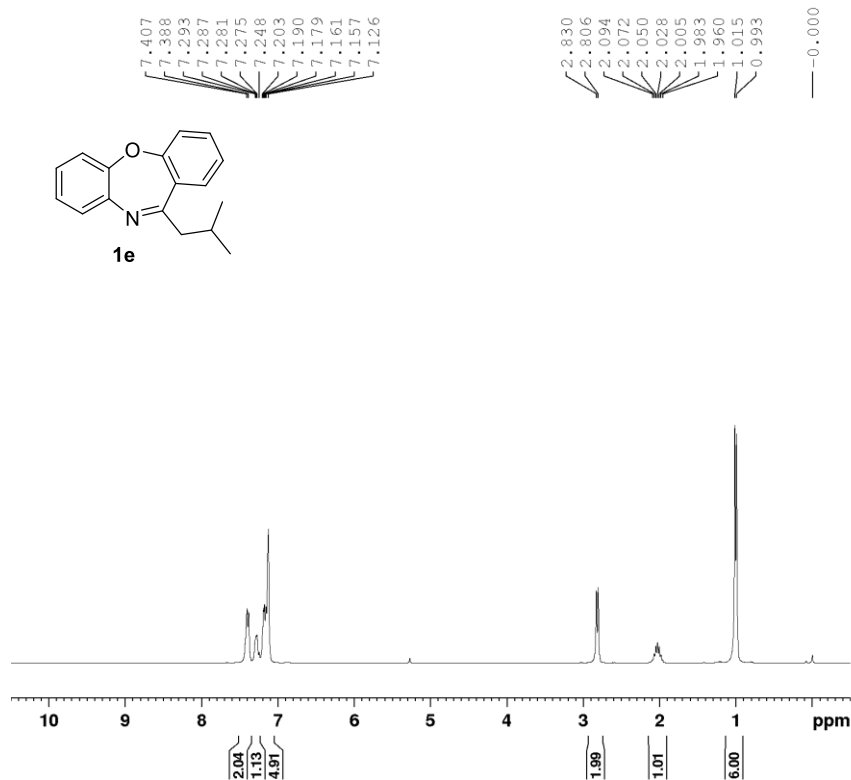

Current Data Parameters  
 NAME 500M  
 EXPNO 9  
 PROCNO 1

F2 - Acquisition Parameters  
 Date\_ 20220107  
 Time 0.30 h  
 INSTRUM spect  
 PROBHD 5 mm DUL 13C-1  
 PULPROG zg30  
 TD 65536  
 SOLVENT CDC13  
 NS 16  
 DS 2  
 SWH 6009.615 Hz  
 FIDRES 0.183399 Hz  
 AQ 5.4525952 sec  
 RG 142.81  
 DW 83.200 usec  
 DE 6.50 usec  
 TE 298.3 K  
 D1 1.00000000 sec  
 TD0 1  
 SFO1 300.1318534 MHz  
 NUC1 1H  
 P1 8.00 usec  
 PLW1 18.00000000 W

F2 - Processing parameters  
 SI 65536  
 SF 300.1300112 MHz  
 WDW EM  
 SSB 0  
 LB 0.30 Hz  
 GB 0  
 PC 1.00

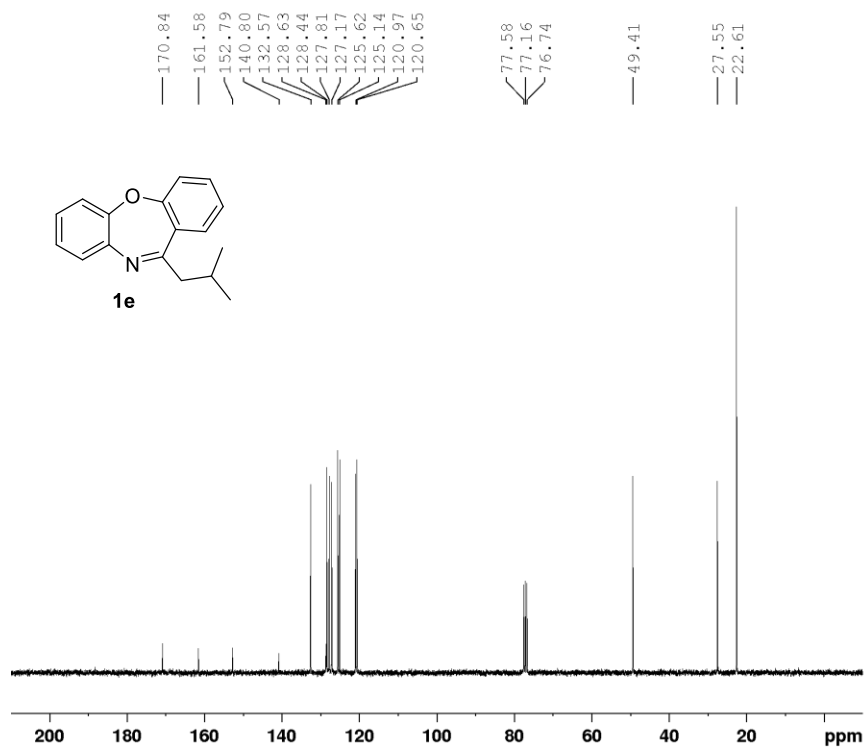

Current Data Parameters  
 NAME 500M  
 EXPNO 10  
 PROCNO 1

F2 - Acquisition Parameters  
 Date\_ 20220107  
 Time 0.54 h  
 INSTRUM spect  
 PROBHD 5 mm DUL 13C-1  
 PULPROG zgpg30  
 TD 65536  
 SOLVENT CDC13  
 NS 252  
 DS 4  
 SWH 18028.846 Hz  
 FIDRES 0.550197 Hz  
 AQ 1.8175317 sec  
 RG 209.09  
 DW 27.733 usec  
 DE 6.50 usec  
 TE 298.3 K  
 D1 2.00000000 sec  
 d11 0.03000000 sec  
 DELTA 1.89999998 sec  
 TD0 1  
 SFO1 75.4752949 MHz  
 NUC1 13C  
 P1 11.00 usec  
 PLW1 195.00000000 W  
 SFO2 300.1312005 MHz  
 NUC2 1H  
 CPDPRG2 waltz16  
 PCPD2 90.00 usec  
 PLW2 14.00000000 W  
 PLW12 0.17284000 W  
 PLW13 0.14000000 W

F2 - Processing parameters  
 SI 32768  
 SF 75.4677409 MHz  
 WDW EM  
 SSB 0  
 LB 1.00 Hz  
 GB 0  
 PC 1.40

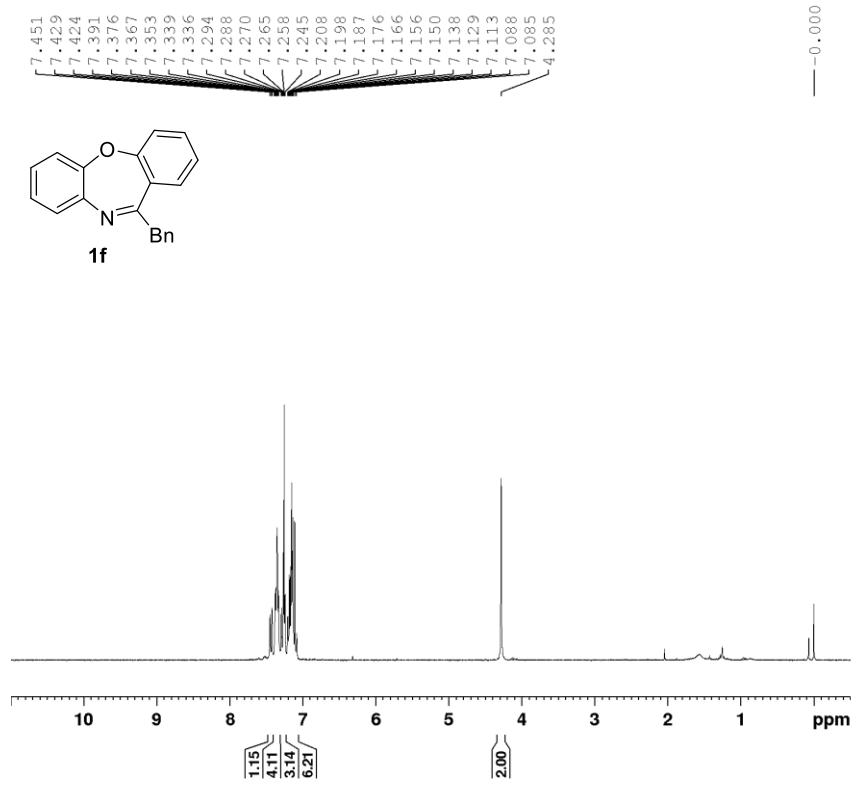

Current Data Parameters  
 NAME 500M  
 EXPNO 11  
 PROCNO 1

F2 - Acquisition Parameters  
 Date\_ 20211214  
 Time 15.25 h  
 INSTRUM spect  
 PROBHD 5 mm DUL 13C-1  
 PULPROG zg30  
 TD 65536  
 SOLVENT CDCl3  
 NS 16  
 DS 2  
 SWH 6009.615 Hz  
 FIDRES 0.183399 Hz  
 AQ 5.4525952 sec  
 RG 209.09  
 DW 83.200 usec  
 DE 6.50 usec  
 TE 298.2 K  
 D1 1.00000000 sec  
 TD0 1  
 SFO1 300.1318534 MHz  
 NUC1 1H  
 P1 8.00 usec  
 PLW1 18.00000000 W

F2 - Processing parameters  
 SI 65536  
 SF 300.1300080 MHz  
 WDW EM  
 SSB 0  
 LB 0.30 Hz  
 GB 0  
 PC 1.00

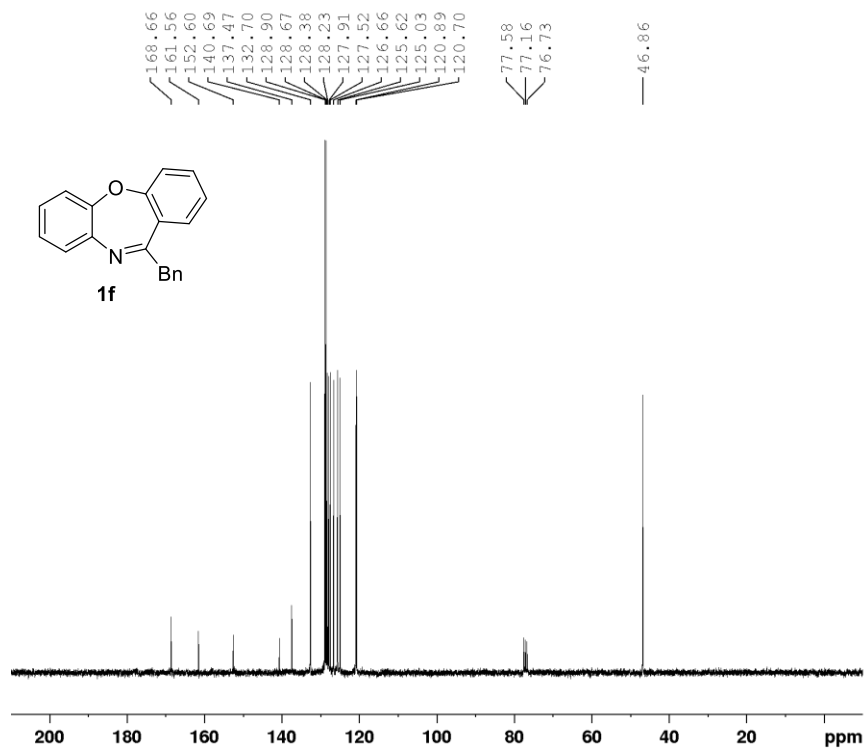

Current Data Parameters  
 NAME 500M  
 EXPNO 12  
 PROCNO 1

F2 - Acquisition Parameters  
 Date\_ 20211229  
 Time 13.41 h  
 INSTRUM spect  
 PROBHD 5 mm DUL 13C-1  
 PULPROG zgpg30  
 TD 65536  
 SOLVENT CDCl3  
 NS 40  
 DS 4  
 SWH 18028.846 Hz  
 FIDRES 0.550197 Hz  
 AQ 1.8175317 sec  
 RG 209.09  
 DW 27.733 usec  
 DE 6.50 usec  
 TE 298.2 K  
 D1 2.00000000 sec  
 d11 0.03000000 sec  
 DELTA 1.89999998 sec  
 TD0 1  
 SFO1 75.4752949 MHz  
 NUC1 13C  
 P1 11.00 usec  
 PLW1 195.00000000 W  
 SFO2 300.1312005 MHz  
 NUC2 1H  
 CPDPRG [2] waltz16  
 FCB2 90.00 usec  
 PLM2 14.00000000 W  
 PLW12 0.17284000 W  
 PLW13 0.14000000 W

F2 - Processing parameters  
 SI 32768  
 SF 75.4677583 MHz  
 WDW EM  
 SSB 0  
 LB 1.00 Hz  
 GB 0  
 PC 1.40

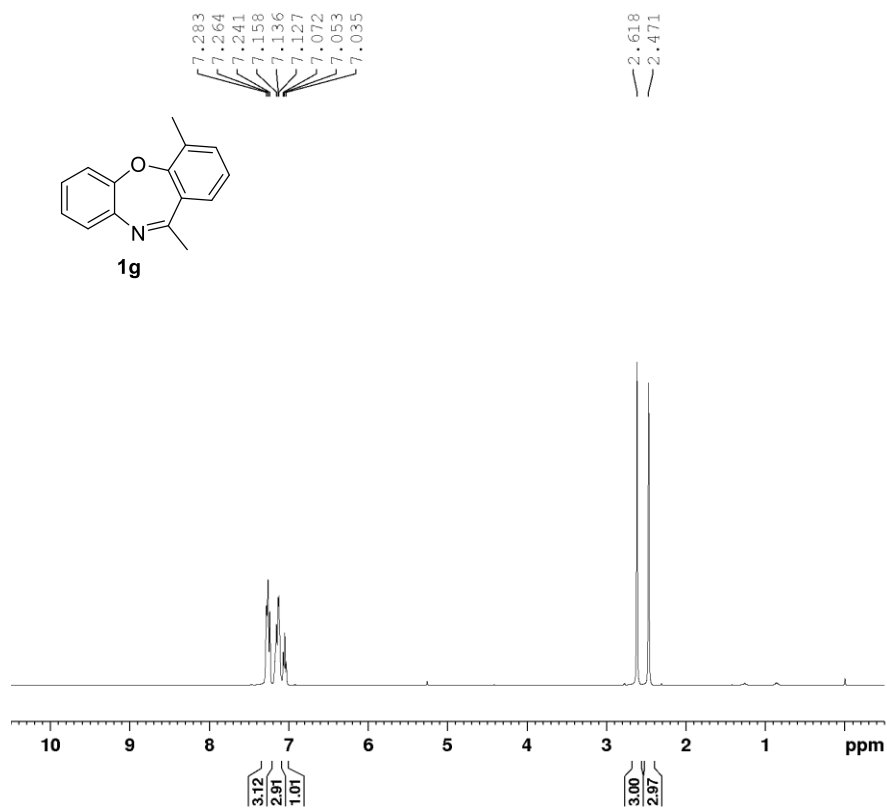

Current Data Parameters  
 NAME 500M  
 EXPNO 13  
 PROCNO 1

F2 - Acquisition Parameters  
 Date\_ 20230202  
 Time 10.37 h  
 INSTRUM spect  
 PROBHD 5 mm PABBO BB/  
 PULPROG zg30  
 TD 32768  
 SOLVENT CDCl3  
 NS 16  
 DS 0  
 SWH 8012.820 Hz  
 FIDRES 0.489064 Hz  
 AQ 2.0447233 sec  
 RG 65.71  
 DW 62.400 usec  
 DE 6.50 usec  
 TE 298.0 K  
 D1 2.00000000 sec  
 TD0 4  
 SFO1 400.2424716 MHz  
 NUC1 1H  
 P1 14.30 usec  
 PLW1 12.00000000 W

F2 - Processing parameters  
 SI 65536  
 SF 400.2400178 MHz  
 WDW EM  
 SSB 0  
 LB 0.30 Hz  
 GB 0  
 PC 1.00

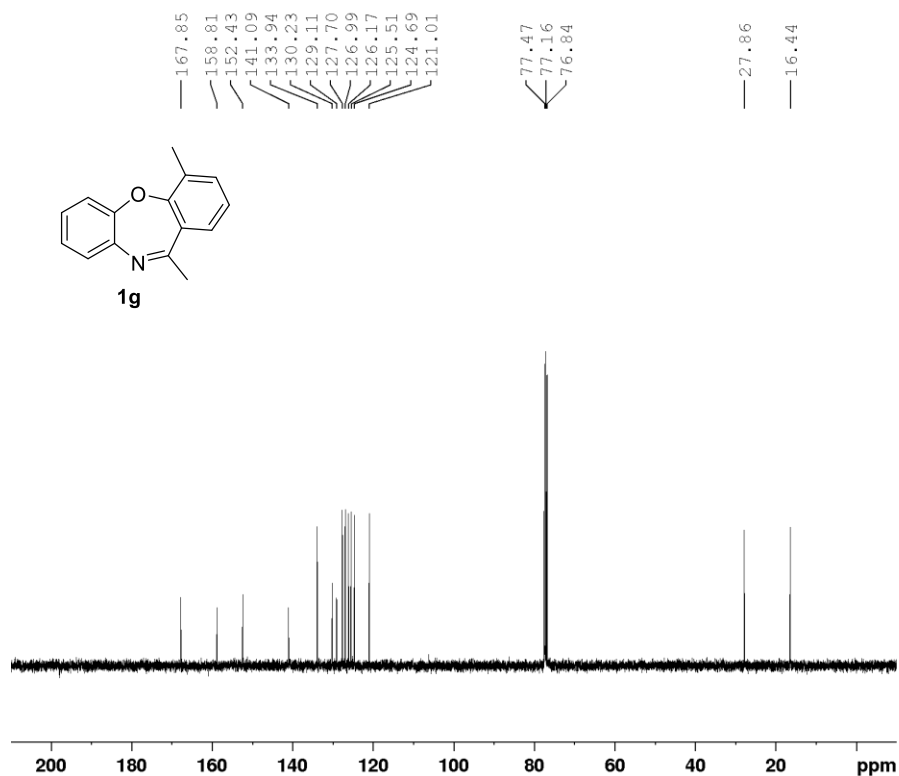

Current Data Parameters  
 NAME 500M  
 EXPNO 14  
 PROCNO 1

F2 - Acquisition Parameters  
 Date\_ 20230202  
 Time 10.38 h  
 INSTRUM spect  
 PROBHD 5 mm PABBO BB/  
 PULPROG zgpg30  
 TD 65536  
 SOLVENT CDCl3  
 NS 55  
 DS 4  
 SWH 24038.461 Hz  
 FIDRES 0.733596 Hz  
 AQ 1.3631488 sec  
 RG 206.33  
 DW 20.800 usec  
 DE 6.50 usec  
 TE 298.1 K  
 D1 2.00000000 sec  
 d11 0.03000000 sec  
 DELTA 1.89999998 sec  
 TD0 1  
 SFO1 100.6504916 MHz  
 NUC1 13C  
 P1 10.00 usec  
 PLW1 54.00000000 W  
 SFO2 400.2416010 MHz  
 NUC2 1H  
 CPDPRG[2] waltz16  
 PCPD2 90.00 usec  
 PLW2 12.00000000 W  
 PLW12 0.30294999 W  
 PLW13 0.24539000 W

F2 - Processing parameters  
 SI 32768  
 SF 100.6404220 MHz  
 WDW EM  
 SSB 0  
 LB 1.00 Hz  
 GB 0  
 PC 1.40

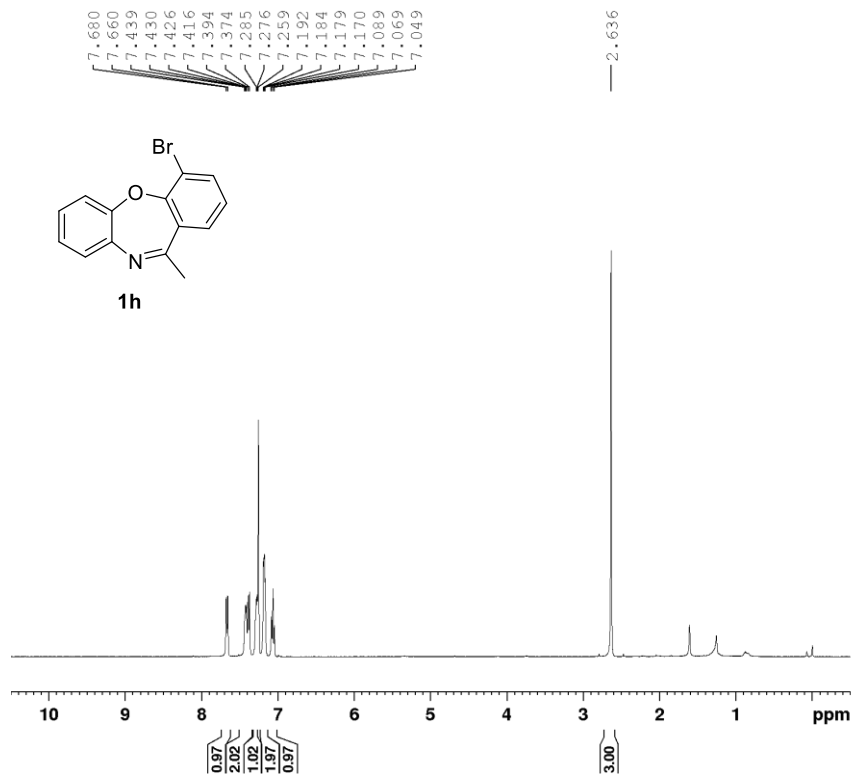

Current Data Parameters  
 NAME 500M  
 EXPNO 244  
 PROCNO 1

F2 - Acquisition Parameters  
 Date\_ 20221115  
 Time 16.42 h  
 INSTRUM spect  
 PROBHD 5 mm PABBO BB/  
 PULPROG zg30  
 TD 32768  
 SOLVENT CDC13  
 NS 16  
 DS 0  
 SWH 8012.820 Hz  
 FIDRES 0.489064 Hz  
 AQ 2.0447233 sec  
 RG 206.33  
 DW 62.400 usec  
 DE 6.50 usec  
 TE 298.0 K  
 D1 2.0000000 sec  
 TD0 1  
 SFO1 400.2424716 MHz  
 NUC1 1H  
 P1 14.30 usec  
 PLW1 12.00000000 W

F2 - Processing parameters  
 SI 65536  
 SF 400.2400103 MHz  
 WDW EM  
 SSB 0  
 LB 0.30 Hz  
 GB 0  
 FC 1.00

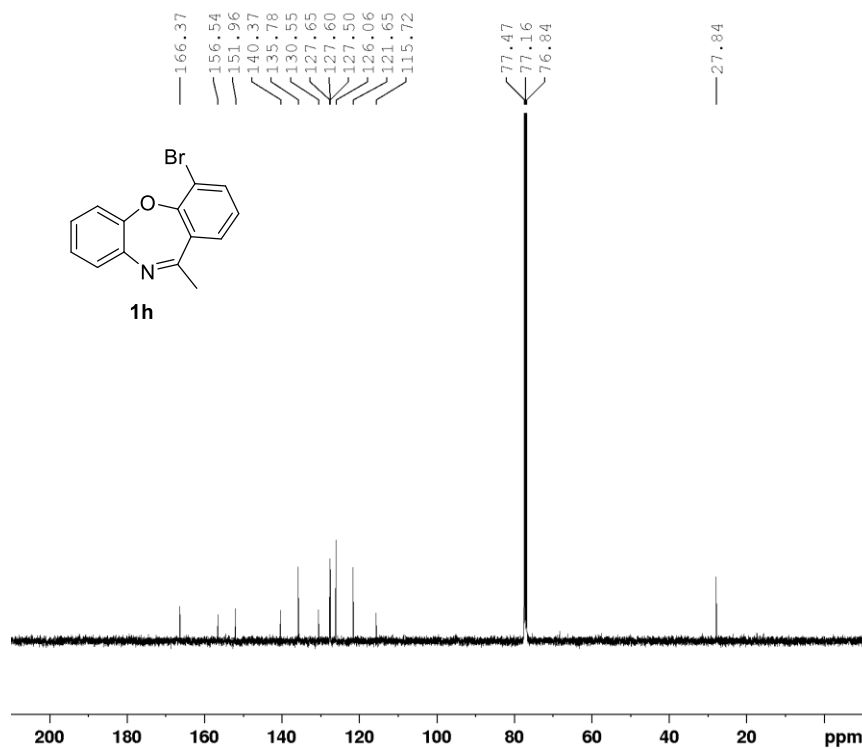

Current Data Parameters  
 NAME 500M  
 EXPNO 265  
 PROCNO 1

F2 - Acquisition Parameters  
 Date\_ 20221115  
 Time 23.13 h  
 INSTRUM spect  
 PROBHD 5 mm PABBO BB/  
 PULPROG zgpg30  
 TD 65536  
 SOLVENT CDC13  
 NS 1024  
 DS 4  
 SWH 24038.461 Hz  
 FIDRES 0.733596 Hz  
 AQ 1.3631488 sec  
 RG 206.33  
 DW 20.800 usec  
 DE 6.50 usec  
 TE 298.0 K  
 D1 2.0000000 sec  
 d11 0.0300000 sec  
 DELTA 1.89999998 sec  
 TD0 1  
 SFO1 100.6504916 MHz  
 NUC1 13C  
 P1 10.00 usec  
 PLW1 54.00000000 W  
 SFO2 400.2416010 MHz  
 NUC2 1H  
 CPDPRG [2] waltz16  
 PCED2 90.00 usec  
 PLN2 12.00000000 W  
 PLW12 0.30294999 W  
 PLW13 0.24539000 W

F2 - Processing parameters  
 SI 32768  
 SF 100.6404150 MHz  
 WDW EM  
 SSB 0  
 LB 1.00 Hz  
 GB 0  
 FC 1.40

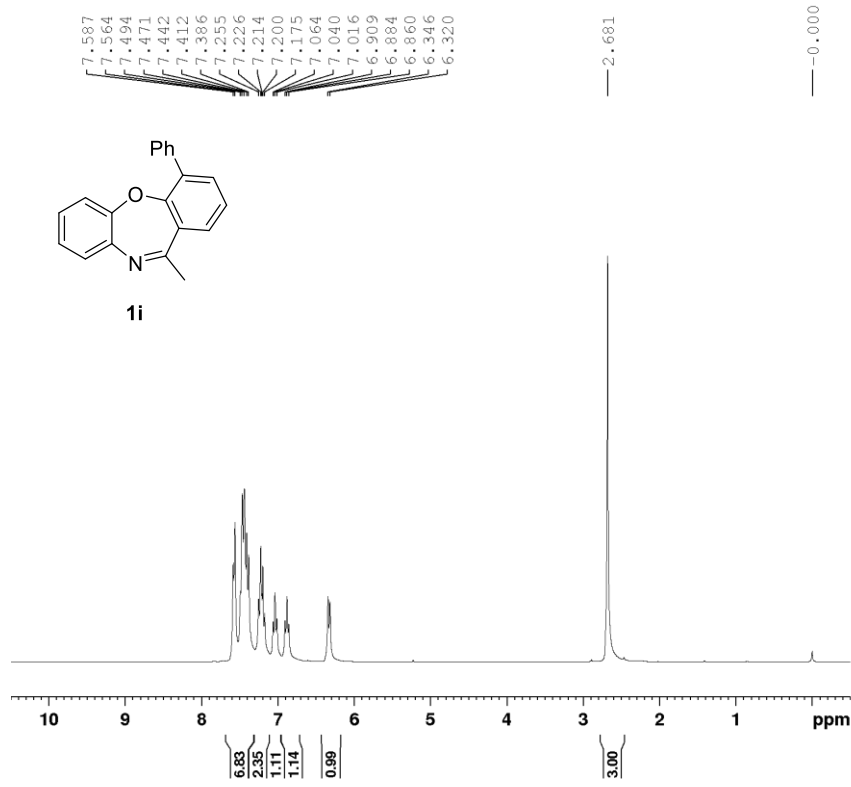

Current Data Parameters  
 NAME 500M  
 EXPNO 19  
 PROCNO 1

F2 - Acquisition Parameters  
 Date\_ 20221009  
 Time 23.29 h  
 INSTRUM spect  
 PROBHD 5 mm DUL 13C-1  
 PULPROG zg30  
 TD 65536  
 SOLVENT CDCl3  
 NS 16  
 DS 2  
 SWH 6009.615 Hz  
 FIDRES 0.183399 Hz  
 AQ 5.4525952 sec  
 RG 74.53  
 DW 83.200 usec  
 DE 6.50 usec  
 TE 298.2 K  
 D1 1.00000000 sec  
 SFO1 300.1318534 MHz  
 NUC1 1H  
 P1 8.00 usec  
 PLW1 18.00000000 W

F2 - Processing parameters  
 SI 65536  
 SF 300.1300211 MHz  
 WDW EM  
 SSB 0  
 LB 0.30 Hz  
 GB 0  
 PC 1.00

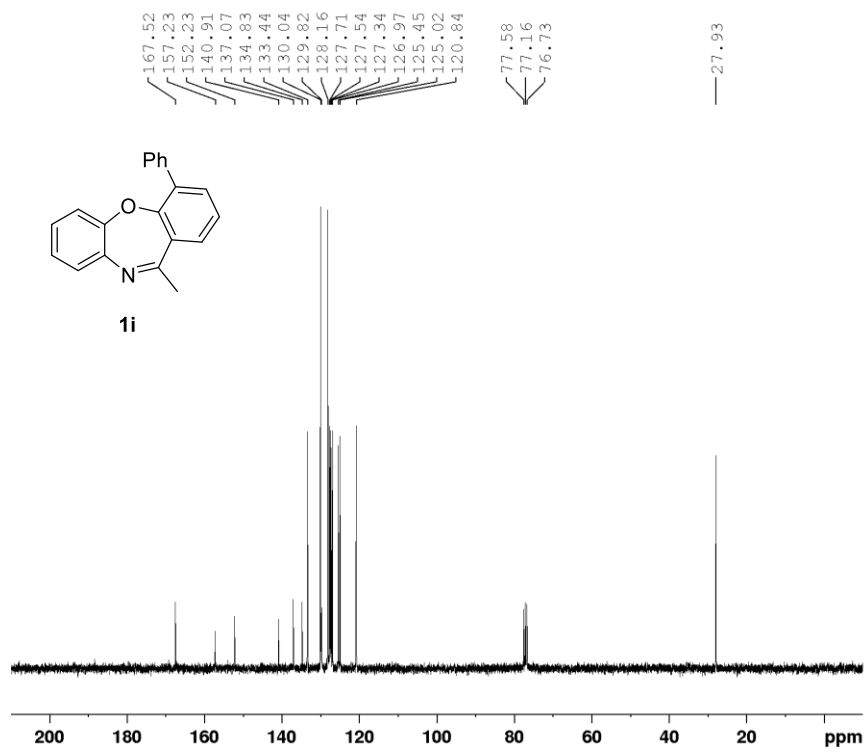

Current Data Parameters  
 NAME 500M  
 EXPNO 20  
 PROCNO 1

F2 - Acquisition Parameters  
 Date\_ 20221009  
 Time 23.48 h  
 INSTRUM spect  
 PROBHD 5 mm DUL 13C-1  
 PULPROG zgpg30  
 TD 65536  
 SOLVENT CDCl3  
 NS 66  
 DS 4  
 SWH 18028.846 Hz  
 FIDRES 0.550197 Hz  
 AQ 1.8175317 sec  
 RG 209.09  
 DW 27.733 usec  
 DE 6.50 usec  
 TE 298.3 K  
 D1 2.00000000 sec  
 d11 0.03000000 sec  
 DELTA 1.89999998 sec  
 TD 1  
 SFO1 75.4752949 MHz  
 NUC1 13C  
 P1 11.00 usec  
 PLW1 195.00000000 W  
 SFO2 300.1312005 MHz  
 NUC2 1H  
 CPDPRG [2] waltz16  
 PCDD2 90.00 usec  
 PLN2 14.00000000 W  
 PLW12 0.17284000 W  
 PLW13 0.14000000 W

F2 - Processing parameters  
 SI 32758  
 SF 75.4677475 MHz  
 WDW EM  
 SSB 0  
 LB 1.00 Hz  
 GB 0  
 PC 1.40

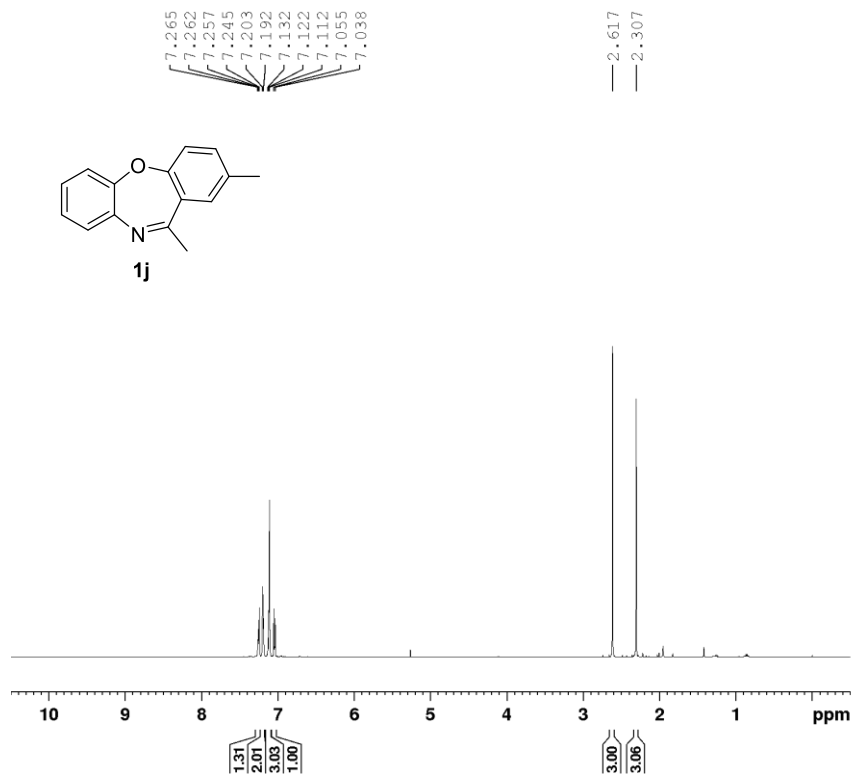

Current Data Parameters  
 NAME 500M  
 EXPNO 21  
 PROCNO 1

F2 - Acquisition Parameters  
 Date\_ 20221114  
 Time 19.49 h  
 INSTRUM spect  
 PROBHD 5 mm PADUL 13C  
 PULPROG zg30  
 TD 65536  
 SOLVENT CDC13  
 NS 16  
 DS 2  
 SWH 10000.000 Hz  
 FIDRES 0.305176 Hz  
 AQ 3.2767999 sec  
 RG 87.79  
 DW 50.000 usec  
 DE 6.50 usec  
 TE 0 K  
 D1 1.0000000 sec  
 TD0 1  
 SFO1 500.1330885 MHz  
 NUC1 1H  
 P1 11.30 usec  
 PLW1 20.0000000 W

F2 - Processing parameters  
 SI 65536  
 SF 500.1300202 MHz  
 WDW EM  
 SSB 0  
 LB 0.30 Hz  
 GB 0  
 FC 1.00

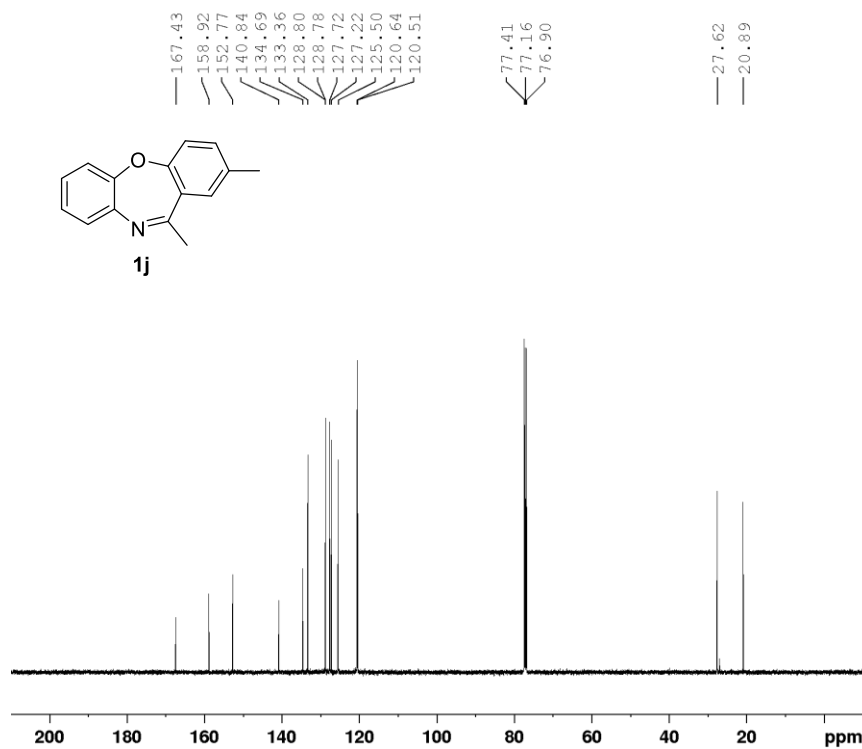

Current Data Parameters  
 NAME 500M  
 EXPNO 22  
 PROCNO 1

F2 - Acquisition Parameters  
 Date\_ 20221114  
 Time 19.53 h  
 INSTRUM spect  
 PROBHD 5 mm PADUL 13C  
 PULPROG zgpg30  
 TD 65536  
 SOLVENT CDC13  
 NS 190  
 DS 4  
 SWH 29761.904 Hz  
 FIDRES 0.908261 Hz  
 AQ 1.1010048 sec  
 RG 192.89  
 DW 16.800 usec  
 DE 6.50 usec  
 TE 0 K  
 D1 2.0000000 sec  
 d11 0.0300000 sec  
 DELTA 1.89999998 sec  
 TD0 1  
 SFO1 125.7703637 MHz  
 NUC1 13C  
 P1 10.00 usec  
 PLW1 80.0000000 W  
 SFO2 500.1320005 MHz  
 NUC2 1H  
 CPDPRG [2] waltz16  
 PCED2 80.00 usec  
 PLW2 20.0000000 W  
 PLW12 0.39903000 W  
 PLW13 0.25538000 W

F2 - Processing parameters  
 SI 32758  
 SF 125.7577761 MHz  
 WDW EM  
 SSB 0  
 LB 1.00 Hz  
 GB 0  
 FC 1.40

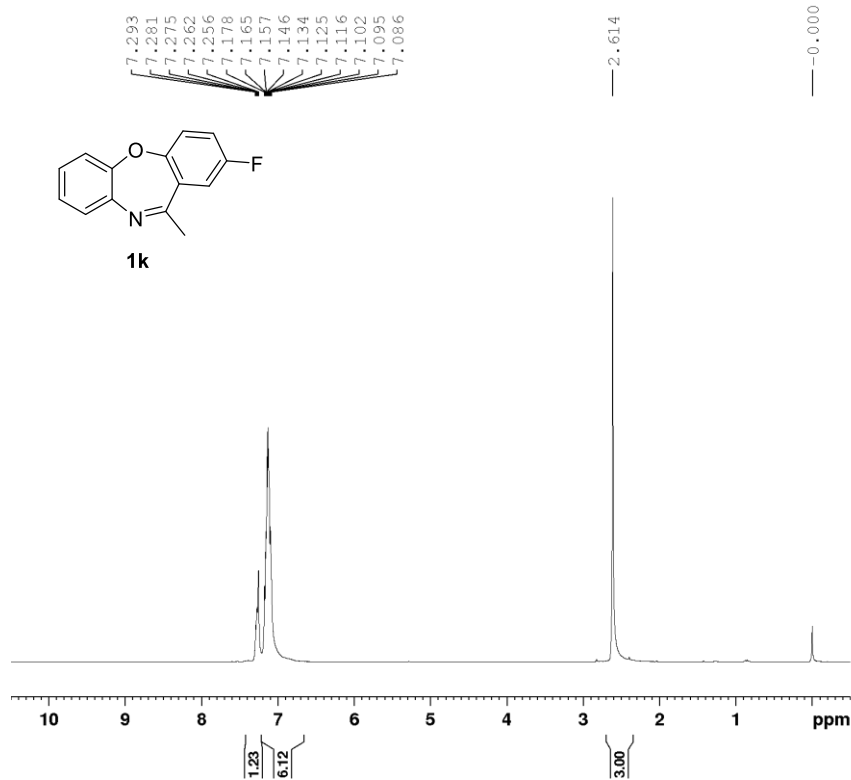

Current Data Parameters  
 NAME 500M  
 EXPNO 21  
 PROCNO 1

F2 - Acquisition Parameters  
 Date\_ 20221010  
 Time 1.05 h  
 INSTRUM spect  
 PROBHD 5 mm DUL 13C-1  
 PULPROG zg30  
 TD 65536  
 SOLVENT CDCl3  
 NS 16  
 DS 2  
 SWH 6009.615 Hz  
 FIDRES 0.183399 Hz  
 AQ 5.4525952 sec  
 RG 186.23  
 DW 83.200 usec  
 DE 6.50 usec  
 TE 298.3 K  
 D1 1.00000000 sec  
 TDO 1  
 SFO1 300.1318534 MHz  
 NUC1 1H  
 P1 8.00 usec  
 PLW1 18.00000000 W

F2 - Processing parameters  
 SI 65536  
 SF 300.1300086 MHz  
 WDW EM  
 SSB 0  
 LB 0.30 Hz  
 GB 0  
 PC 1.00

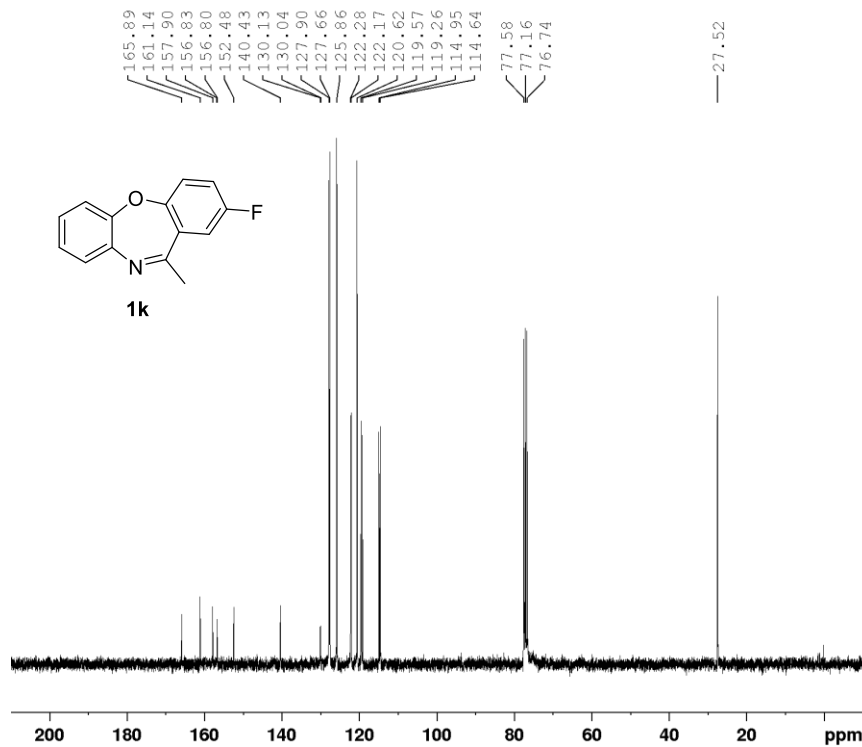

Current Data Parameters  
 NAME 500M  
 EXPNO 22  
 PROCNO 1

F2 - Acquisition Parameters  
 Date\_ 20221010  
 Time 0.56 h  
 INSTRUM spect  
 PROBHD 5 mm DUL 13C-1  
 PULPROG zgpg30  
 TD 65536  
 SOLVENT CDCl3  
 NS 923  
 DS 4  
 SWH 18028.846 Hz  
 FIDRES 0.550197 Hz  
 AQ 1.8175317 sec  
 RG 209.09  
 DW 27.733 usec  
 DE 6.50 usec  
 TE 298.2 K  
 D1 2.00000000 sec  
 d11 0.03000000 sec  
 DELTA 1.89999998 sec  
 TDO 1  
 SFO1 75.4752949 MHz  
 NUC1 13C  
 P1 11.00 usec  
 PLW1 195.00000000 W  
 SFO2 300.1312005 MHz  
 NUC2 1H  
 CPDPRG [2] waltz16  
 PCDD2 90.00 usec  
 PLN2 14.00000000 W  
 PLW12 0.17284000 W  
 PLW13 0.14000000 W

F2 - Processing parameters  
 SI 32768  
 SF 75.4677398 MHz  
 WDW EM  
 SSB 0  
 LB 1.00 Hz  
 GB 0  
 PC 1.40



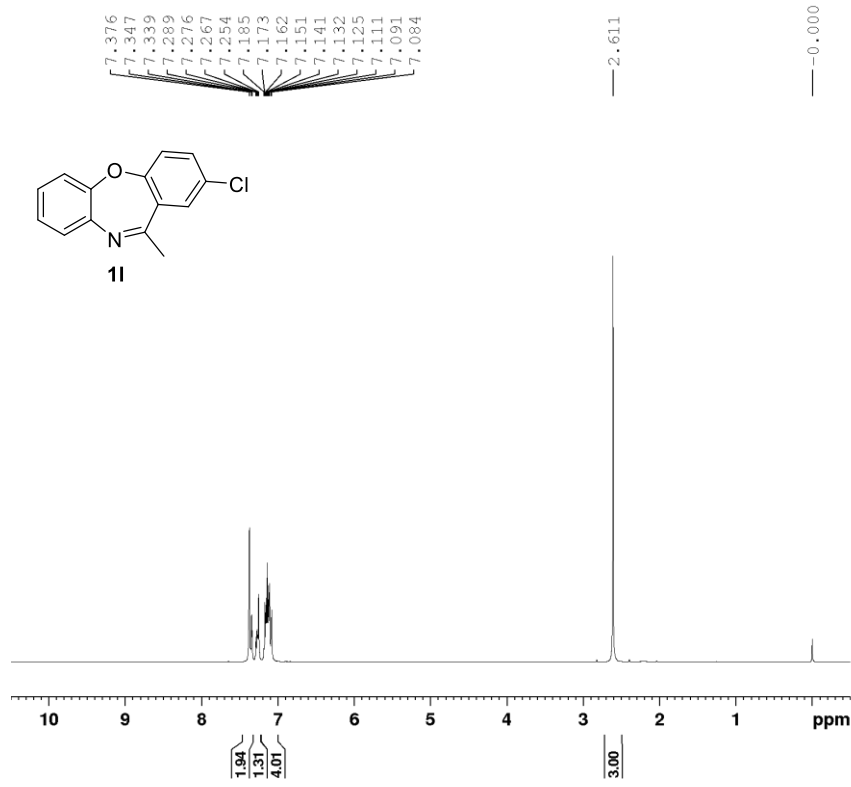

Current Data Parameters  
 NAME 500M  
 EXPNO 23  
 PROCNO 1

F2 - Acquisition Parameters  
 Date\_ 20220908  
 Time 15.50 h  
 INSTRUM spect  
 PROBHD 5 mm DUL 13C-1  
 PULPROG zg30  
 TD 65536  
 SOLVENT CDCl3  
 NS 16  
 DS 2  
 SWH 6009.615 Hz  
 FIDRES 0.183399 Hz  
 AQ 5.4525952 sec  
 RG 186.23  
 DW 83.200 usec  
 DE 6.50 usec  
 TE 299.9 K  
 D1 1.00000000 sec  
 TD0 1  
 SFO1 300.1318534 MHz  
 NUC1 1H  
 P1 8.00 usec  
 PLW1 18.00000000 W

F2 - Processing parameters  
 SI 65536  
 SF 300.1300091 MHz  
 WDW EM  
 SSB 0  
 LB 0.30 Hz  
 GB 0  
 PC 1.00

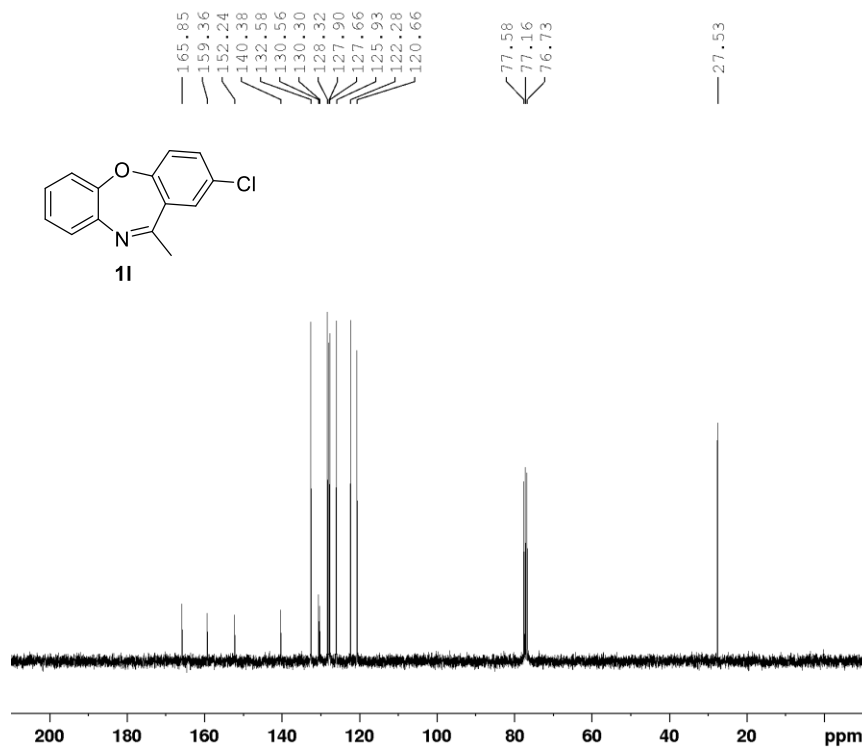

Current Data Parameters  
 NAME 500M  
 EXPNO 24  
 PROCNO 1

F2 - Acquisition Parameters  
 Date\_ 20220909  
 Time 13.44 h  
 INSTRUM spect  
 PROBHD 5 mm DUL 13C-1  
 PULPROG zgpg30  
 TD 65536  
 SOLVENT CDCl3  
 NS 162  
 DS 4  
 SWH 18028.846 Hz  
 FIDRES 0.550197 Hz  
 AQ 1.8175317 sec  
 RG 209.09  
 DW 27.733 usec  
 DE 6.50 usec  
 TE 300.6 K  
 D1 2.00000000 sec  
 d11 0.03000000 sec  
 DELTA 1.89999998 sec  
 TD0 1  
 SFO1 75.4752949 MHz  
 NUC1 13C  
 P1 11.00 usec  
 PLW1 195.00000000 W  
 SFO2 300.1312005 MHz  
 NUC2 1H  
 CPDPRG [2] waltz16  
 PCED2 90.00 usec  
 PLM2 14.00000000 W  
 PLM12 0.17284000 W  
 PLM13 0.14000000 W

F2 - Processing parameters  
 SI 32768  
 SF 75.4677484 MHz  
 WDW EM  
 SSB 0  
 LB 1.00 Hz  
 GB 0  
 PC 1.40

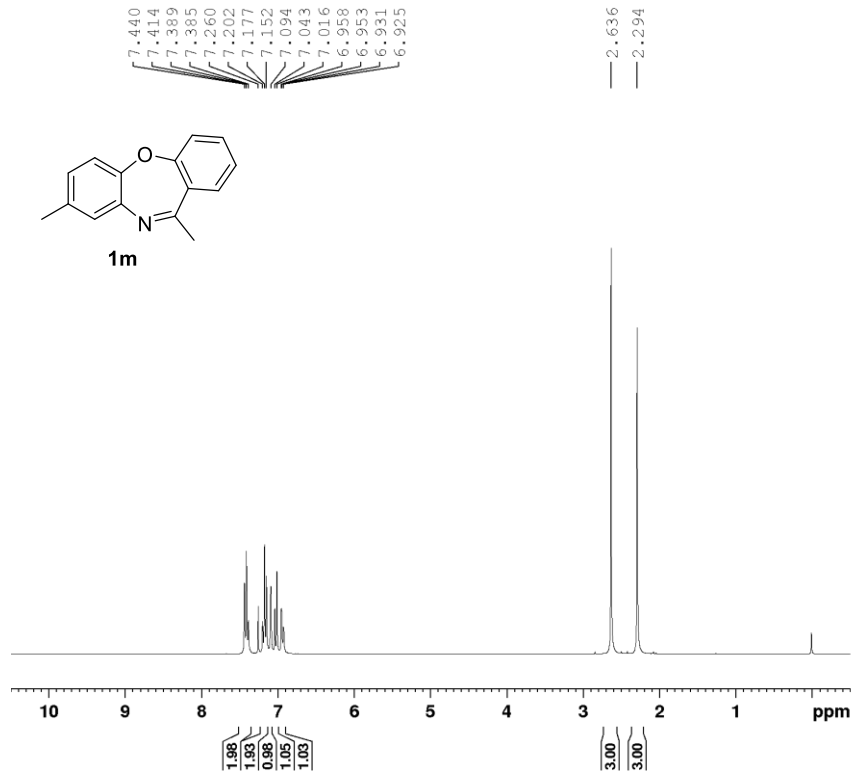

Current Data Parameters  
 NAME 500M  
 EXPNO 25  
 PROCNO 1

F2 - Acquisition Parameters  
 Date\_ 20220908  
 Time 15.25 h  
 INSTRUM spect  
 PROBHD 5 mm DUL 13C-1  
 PULPROG zg30  
 TD 65536  
 SOLVENT CDC13  
 NS 16  
 DS 2  
 SWH 6009.615 Hz  
 FIDRES 0.183399 Hz  
 AQ 5.4525952 sec  
 RG 142.91  
 DW 83.200 usec  
 DE 6.50 usec  
 TE 299.9 K  
 D1 1.0000000 sec  
 TD0 1  
 SFO1 300.1318534 MHz  
 NUC1 1H  
 P1 8.00 usec  
 PLW1 18.0000000 W

F2 - Processing parameters  
 SI 65536  
 SF 300.1300072 MHz  
 WDW EM  
 SSB 0  
 LB 0.30 Hz  
 GB 0  
 PC 1.00

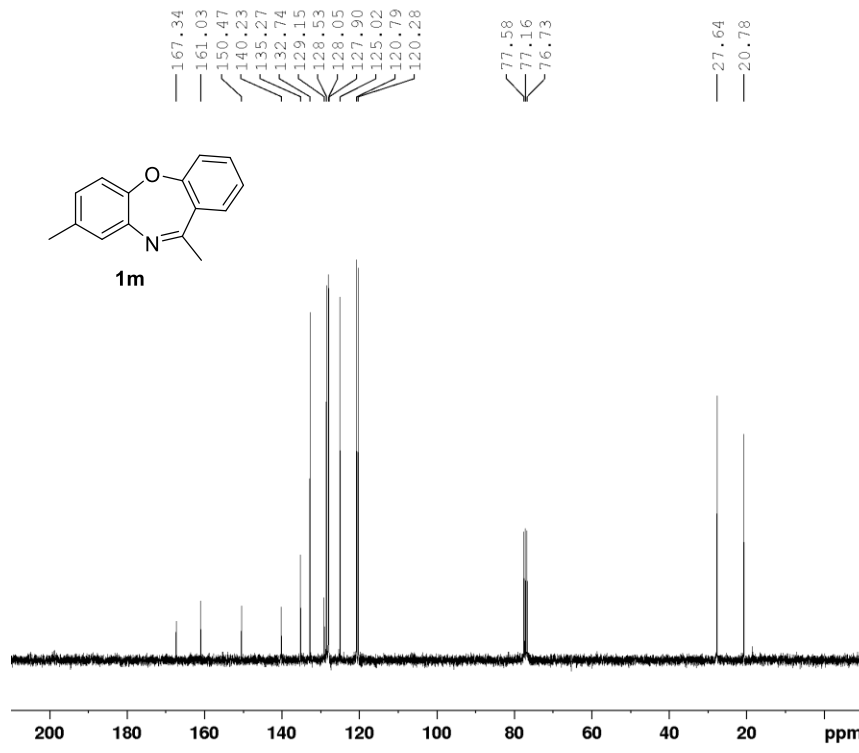

Current Data Parameters  
 NAME 500M  
 EXPNO 26  
 PROCNO 1

F2 - Acquisition Parameters  
 Date\_ 20220909  
 Time 13.28 h  
 INSTRUM spect  
 PROBHD 5 mm DUL 13C-1  
 PULPROG zgpg30  
 TD 65536  
 SOLVENT CDC13  
 NS 156  
 DS 4  
 SWH 18028.846 Hz  
 FIDRES 0.550197 Hz  
 AQ 1.8175317 sec  
 RG 209.09  
 DW 27.733 usec  
 DE 6.50 usec  
 TE 300.1 K  
 D1 2.0000000 sec  
 d11 0.0300000 sec  
 DELTA 1.8999999 sec  
 TD0 1  
 SFO1 75.4752949 MHz  
 NUC1 13C  
 P1 11.00 usec  
 PLW1 195.0000000 W  
 SFO2 300.1312005 MHz  
 NUC2 1H  
 CPDPRG2 waltz16  
 PCPD2 90.00 usec  
 PLW2 14.0000000 W  
 PLW12 0.17284000 W  
 PLW13 0.14000000 W

F2 - Processing parameters  
 SI 32768  
 SF 75.4677430 MHz  
 WDW EM  
 SSB 0  
 LB 1.00 Hz  
 GB 0  
 PC 1.40

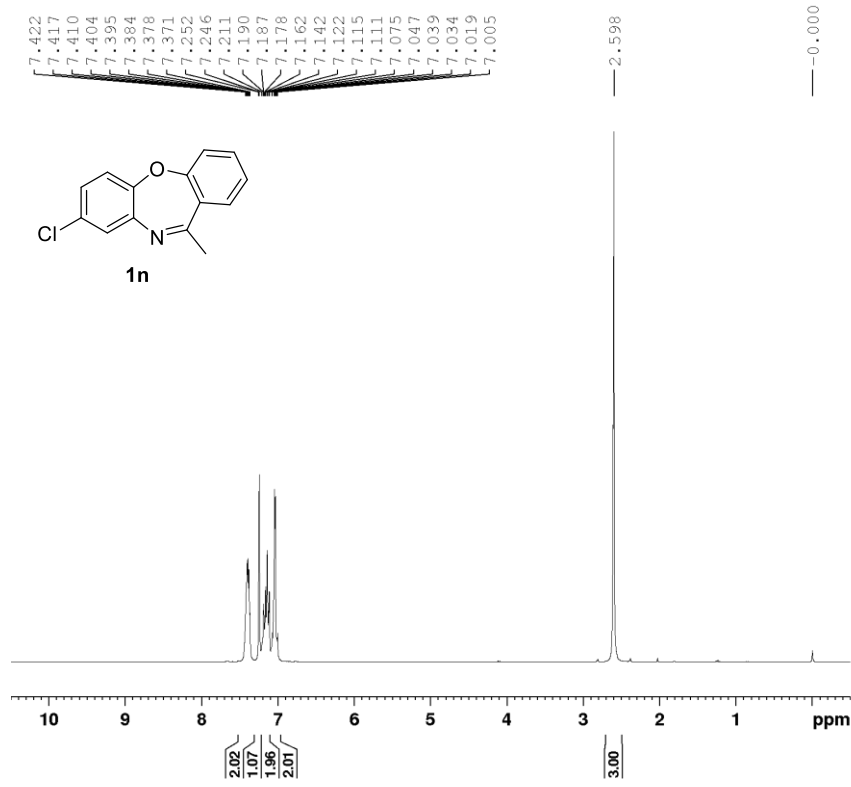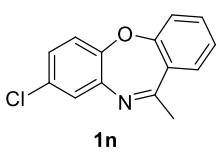

Current Data Parameters  
 NAME 500M  
 EXPNO 27  
 PROCNO 1

F2 - Acquisition Parameters  
 Date\_ 20220916  
 Time 1.26 h  
 INSTRUM spect  
 PROBHD 5 mm DUL 13C-1  
 PULPROG zg30  
 TD 65536  
 SOLVENT CDCl3  
 NS 16  
 DS 2  
 SWH 6009.615 Hz  
 FIDRES 0.183399 Hz  
 AQ 5.4525952 sec  
 RG 93.25  
 DW 83.200 usec  
 DE 6.50 usec  
 TE 298.3 K  
 D1 1.00000000 sec  
 TDO 1  
 SFO1 300.1318534 MHz  
 NUC1 1H  
 P1 8.00 usec  
 PLW1 18.00000000 W

F2 - Processing parameters  
 SI 65536  
 SF 300.1300113 MHz  
 WDW EM  
 SSB 0  
 LB 0.30 Hz  
 GB 0  
 PC 1.00

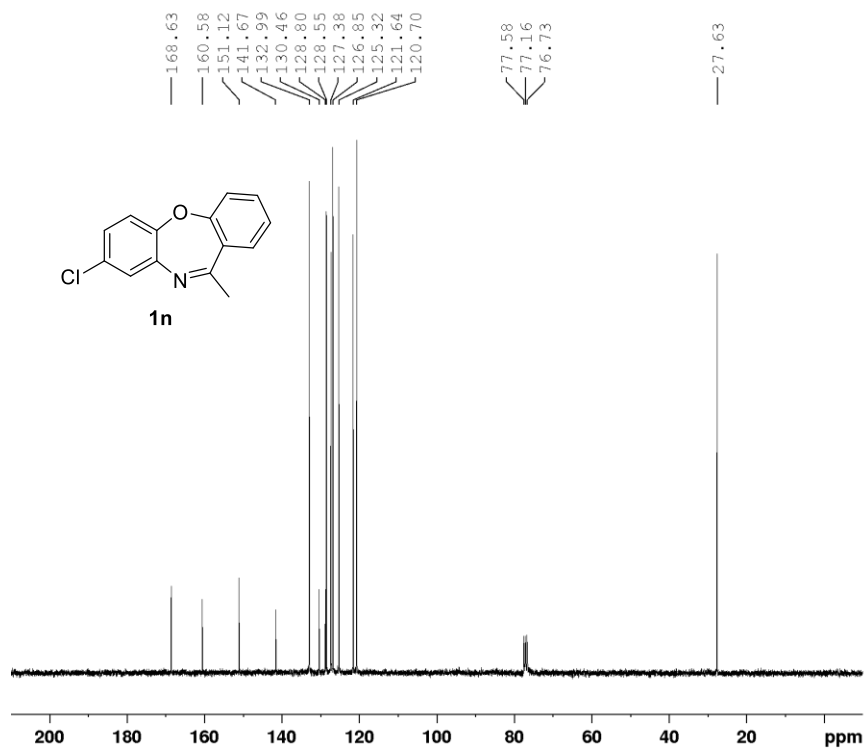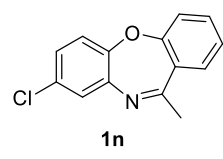

Current Data Parameters  
 NAME 500M  
 EXPNO 28  
 PROCNO 1

F2 - Acquisition Parameters  
 Date\_ 20220916  
 Time 1.37 h  
 INSTRUM spect  
 PROBHD 5 mm DUL 13C-1  
 PULPROG zgpg30  
 TD 65536  
 SOLVENT CDCl3  
 NS 181  
 DS 4  
 SWH 18028.846 Hz  
 FIDRES 0.550197 Hz  
 AQ 1.8175317 sec  
 RG 209.09  
 DW 27.733 usec  
 DE 6.50 usec  
 TE 298.5 K  
 D1 2.00000000 sec  
 d11 0.03000000 sec  
 DELTA 1.89999998 sec  
 TDO 1  
 SFO1 75.4752949 MHz  
 NUC1 13C  
 P1 11.00 usec  
 PLW1 195.00000000 W  
 SFO2 300.1312005 MHz  
 NUC2 1H  
 CPDPRG [2] waltz16  
 PCED2 90.00 usec  
 PLM2 14.00000000 W  
 PLW12 0.17284000 W  
 PLW13 0.14000000 W

F2 - Processing parameters  
 SI 32758  
 SF 75.4677509 MHz  
 WDW EM  
 SSB 0  
 LB 1.00 Hz  
 GB 0  
 PC 1.40

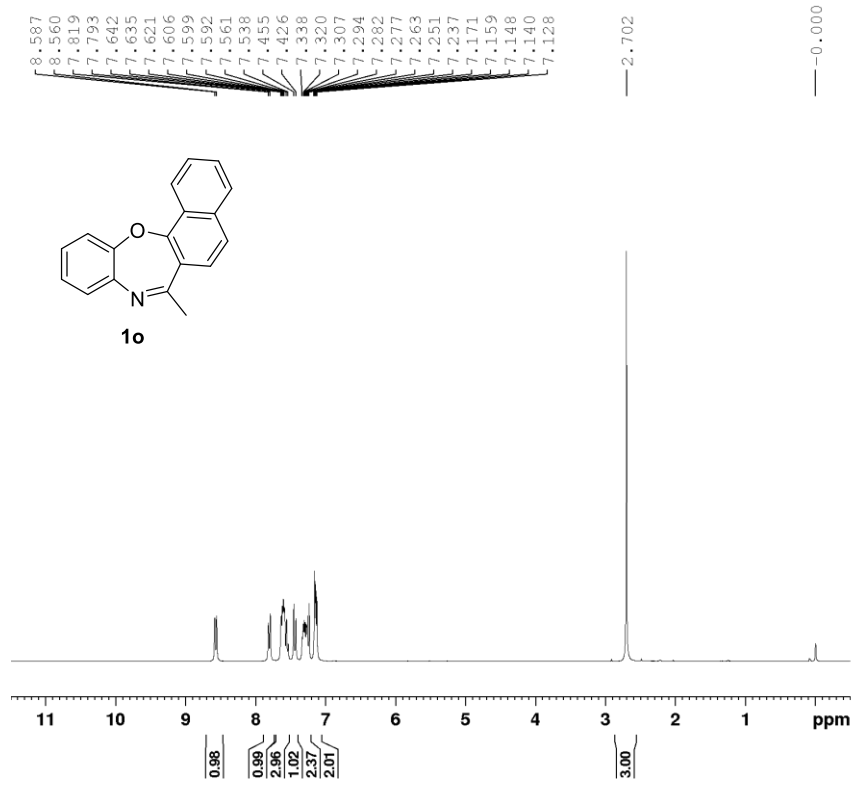

Current Data Parameters  
 NAME 500M  
 EXPNO 29  
 PROCNO 1

F2 - Acquisition Parameters  
 Date\_ 20220908  
 Time 15.45 h  
 INSTRUM spect  
 PROBHD 5 mm DUL 13C-1  
 PULPROG zg30  
 TD 65536  
 SOLVENT CDCl3  
 NS 16  
 DS 2  
 SWH 6009.615 Hz  
 FIDRES 0.183399 Hz  
 AQ 5.4525952 sec  
 RG 166.41  
 DW 83.200 usec  
 DE 6.50 usec  
 TE 299.9 K  
 D1 1.00000000 sec  
 TDO 1  
 SFO1 300.1318534 MHz  
 NUC1 1H  
 P1 8.00 usec  
 PLW1 18.00000000 W

F2 - Processing parameters  
 SI 65536  
 SF 300.1300141 MHz  
 WDW EM  
 SSB 0  
 LB 0.30 Hz  
 GB 0  
 PC 1.00

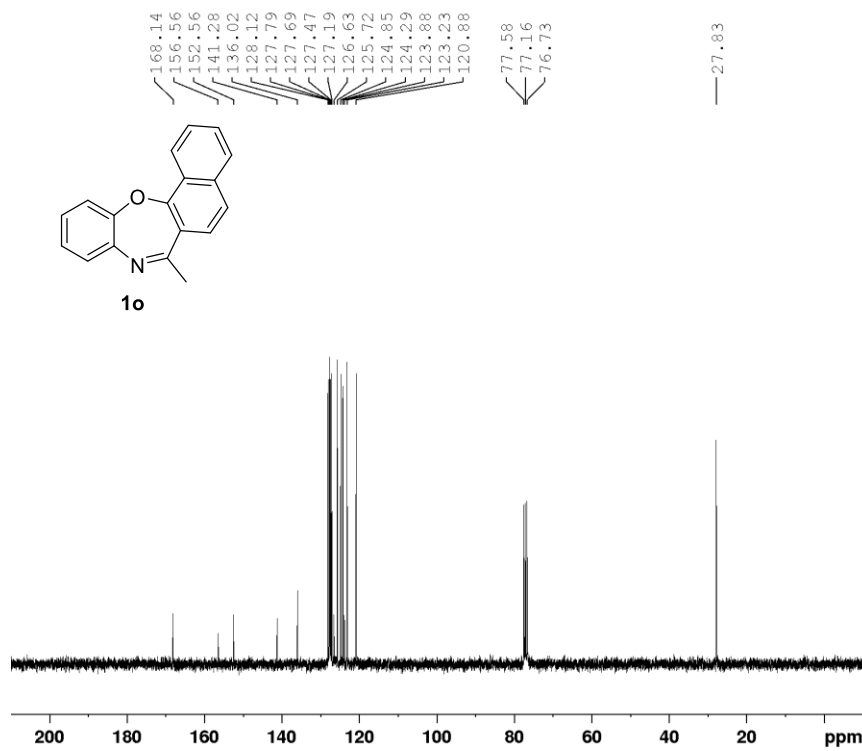

Current Data Parameters  
 NAME 500M  
 EXPNO 30  
 PROCNO 1

F2 - Acquisition Parameters  
 Date\_ 20220909  
 Time 13.53 h  
 INSTRUM spect  
 PROBHD 5 mm DUL 13C-1  
 PULPROG zgpg30  
 TD 65536  
 SOLVENT CDCl3  
 NS 183  
 DS 4  
 SWH 18028.846 Hz  
 FIDRES 0.550197 Hz  
 AQ 1.8175317 sec  
 RG 209.09  
 DW 27.733 usec  
 DE 6.50 usec  
 TE 300.4 K  
 D1 2.00000000 sec  
 d11 0.03000000 sec  
 DELTA 1.89999998 sec  
 TDO 1  
 SFO1 75.4752949 MHz  
 NUC1 13C  
 P1 11.00 usec  
 PLW1 195.00000000 W  
 SFO2 300.1312005 MHz  
 NUC2 1H  
 CPDPRG [2] waltz16  
 PCDD2 90.00 usec  
 PLN2 14.00000000 W  
 PLW2 0.17284000 W  
 PLW13 0.14000000 W

F2 - Processing parameters  
 SI 32768  
 SF 75.4677413 MHz  
 WDW EM  
 SSB 0  
 LB 1.00 Hz  
 GB 0  
 PC 1.40

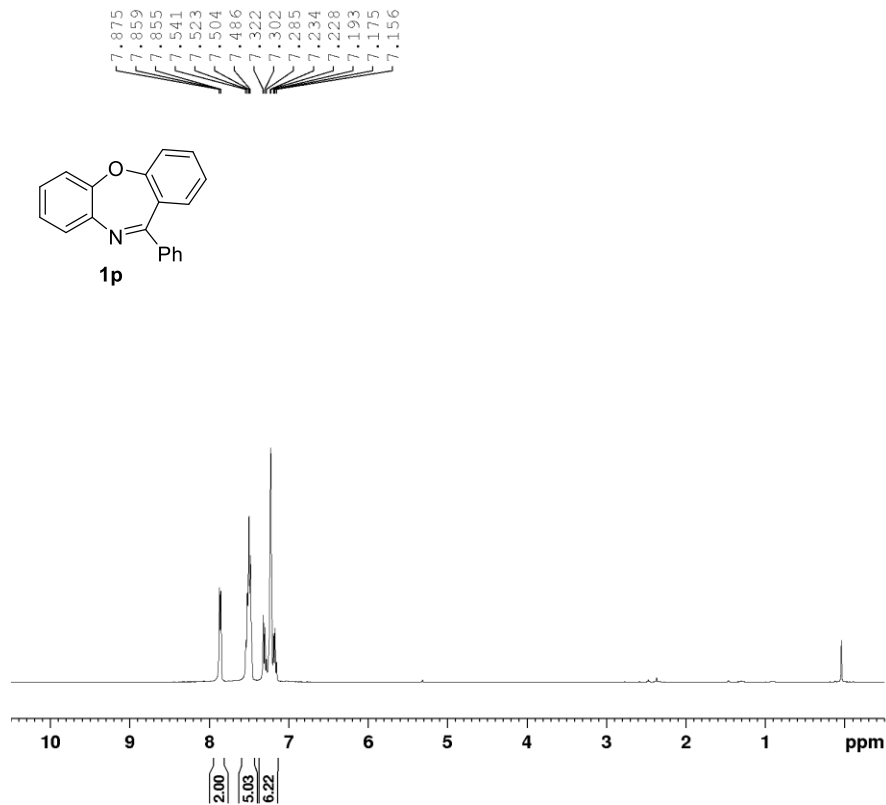

Current Data Parameters  
NAME 500M  
EXPNO 65  
PROCNO 1

F2 - Acquisition Parameters  
Date\_ 20230301  
Time 20.45 h  
INSTRUM spect  
PROBHD 5 mm PABBO BB/  
PULPROG zg30  
TD 32768  
SOLVENT CDC13  
NS 16  
DS 0  
SWH 8012.820 Hz  
FIDRES 0.489064 Hz  
AQ 2.0447233 sec  
RG 206.33  
DW 62.400 usec  
DE 6.50 usec  
TE 298.4 K  
D1 2.0000000 sec  
TD0 1  
SFO1 400.2424716 MHz  
NUC1 1H  
P1 14.30 usec  
PLW1 12.0000000 W

F2 - Processing parameters  
SI 65536  
SF 400.2400000 MHz  
WDW EM  
SSB 0  
LB 0.30 Hz  
GB 0  
PC 1.00

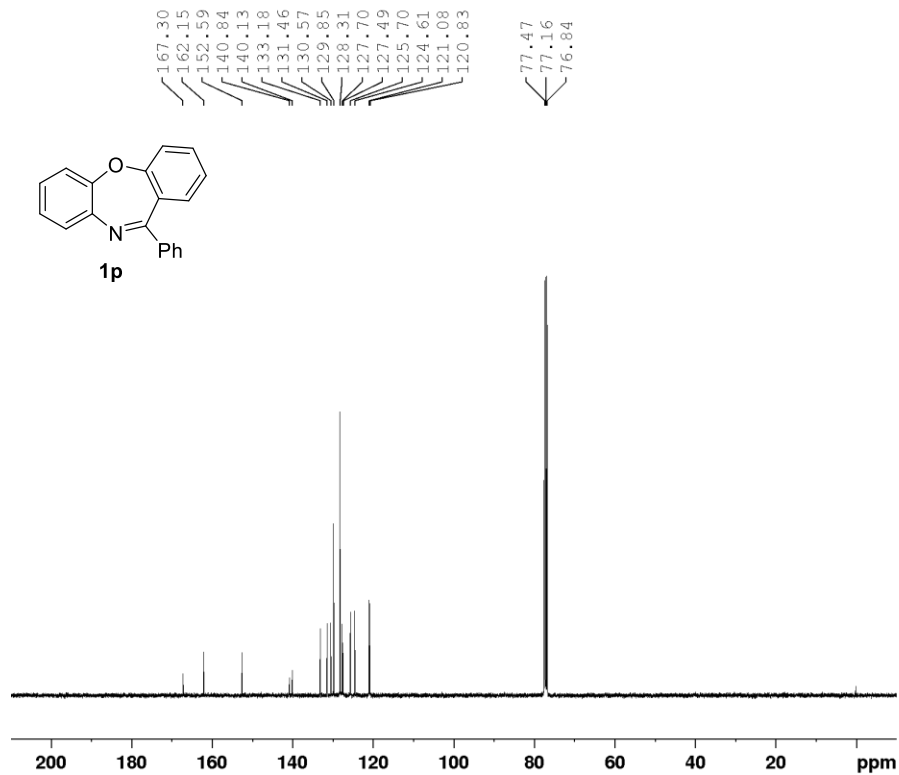

Current Data Parameters  
NAME 500M  
EXPNO 66  
PROCNO 1

F2 - Acquisition Parameters  
Date\_ 20230301  
Time 21.44 h  
INSTRUM spect  
PROBHD 5 mm PABBO BB/  
PULPROG zgpg30  
TD 65536  
SOLVENT CDC13  
NS 1024  
DS 4  
SWH 24038.461 Hz  
FIDRES 0.733596 Hz  
AQ 1.3631488 sec  
RG 206.33  
DW 20.800 usec  
DE 6.50 usec  
TE 299.2 K  
D1 2.0000000 sec  
d11 0.0300000 sec  
DELTA 1.89999998 sec  
TD0 1  
SFO1 100.6504916 MHz  
NUC1 13C  
P1 10.00 usec  
PLW1 54.0000000 W  
SFO2 400.2416010 MHz  
NUC2 1H  
CPDPRG[2] waltz16  
PCPD2 90.00 usec  
PLW2 12.0000000 W  
PLW12 0.30294999 W  
PLW13 0.24539000 W

F2 - Processing parameters  
SI 32768  
SF 100.6404180 MHz  
WDW EM  
SSB 0  
LB 1.00 Hz  
GB 0  
PC 1.40

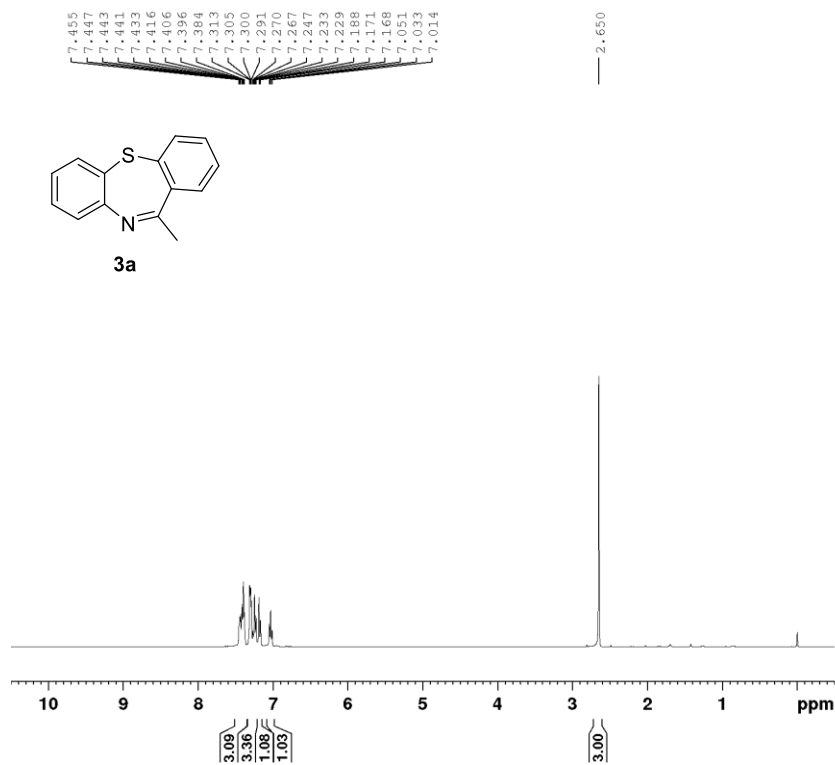

Current Data Parameters  
 NAME 2022-11-05-YZQ-S-Me-Sub  
 EXPNO 1  
 PROCNO 1

F2 - Acquisition Parameters  
 Date\_ 20221105  
 Time 20.36 h  
 INSTRUM spect  
 PROBHD 5 mm PABBO BB/  
 PULPROG zg30  
 TD 32768  
 SOLVENT CDCl3  
 NS 16  
 DS 0  
 SWH 8012.820 Hz  
 FIDRES 0.489064 Hz  
 AQ 2.0447233 sec  
 RG 102.73  
 DW 62.400 usec  
 DE 6.50 usec  
 TE 299.0 K  
 D1 2.00000000 sec  
 TD0 1  
 SFO1 400.2424716 MHz  
 NUC1 1H  
 P1 14.30 usec  
 PLW1 12.00000000 W

F2 - Processing parameters  
 SI 65536  
 SF 400.2400151 MHz  
 WDW EM  
 SSB 0  
 LB 0.30 Hz  
 GB 0  
 PC 1.00

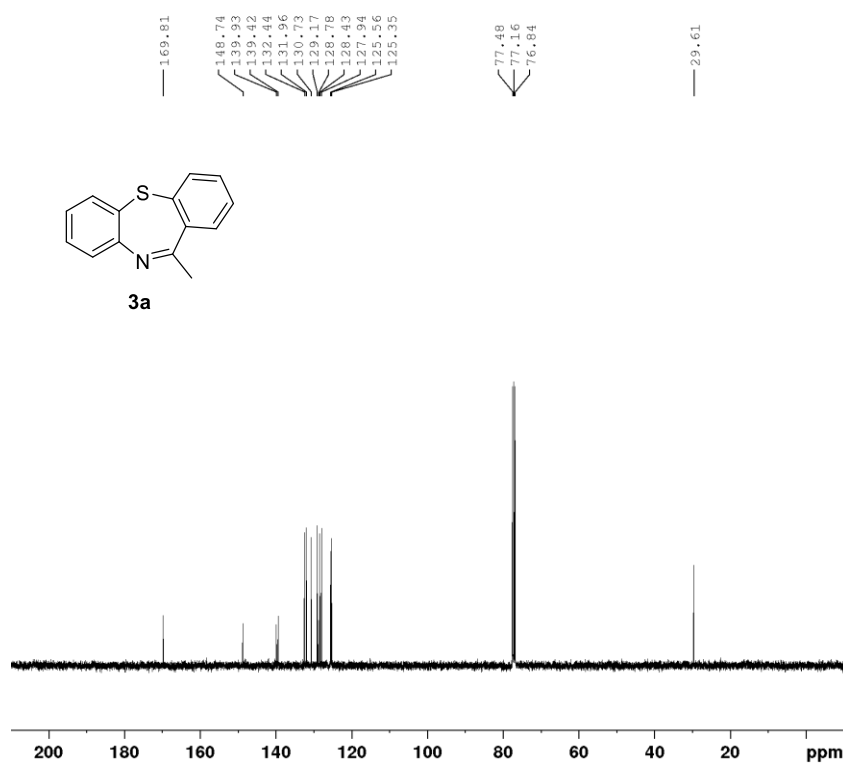

Current Data Parameters  
 NAME 2022-11-05-YZQ-S-Me-Sub  
 EXPNO 2  
 PROCNO 1

F2 - Acquisition Parameters  
 Date\_ 20221105  
 Time 20.40 h  
 INSTRUM spect  
 PROBHD 5 mm PABBO BB/  
 PULPROG zgpg30  
 TD 65536  
 SOLVENT CDCl3  
 NS 64  
 DS 4  
 SWH 24038.461 Hz  
 FIDRES 0.733596 Hz  
 AQ 1.3631488 sec  
 RG 206.33  
 DW 20.800 usec  
 DE 6.50 usec  
 TE 299.6 K  
 D1 2.00000000 sec  
 d11 0.03000000 sec  
 DELTA 1.89999998 sec  
 TD0 1  
 SFO1 100.6504916 MHz  
 NUC1 13C  
 P1 10.00 usec  
 PLW1 54.00000000 W  
 SFO2 400.2416010 MHz  
 NUC2 1H  
 CPDPRG[2] waltz16  
 PCPD2 90.00 usec  
 PLW2 12.00000000 W  
 PLW12 0.30294999 W  
 PLW13 0.24539000 W

F2 - Processing parameters  
 SI 32768  
 SF 100.6404188 MHz  
 WDW EM  
 SSB 0  
 LB 1.00 Hz  
 GB 0  
 PC 1.40

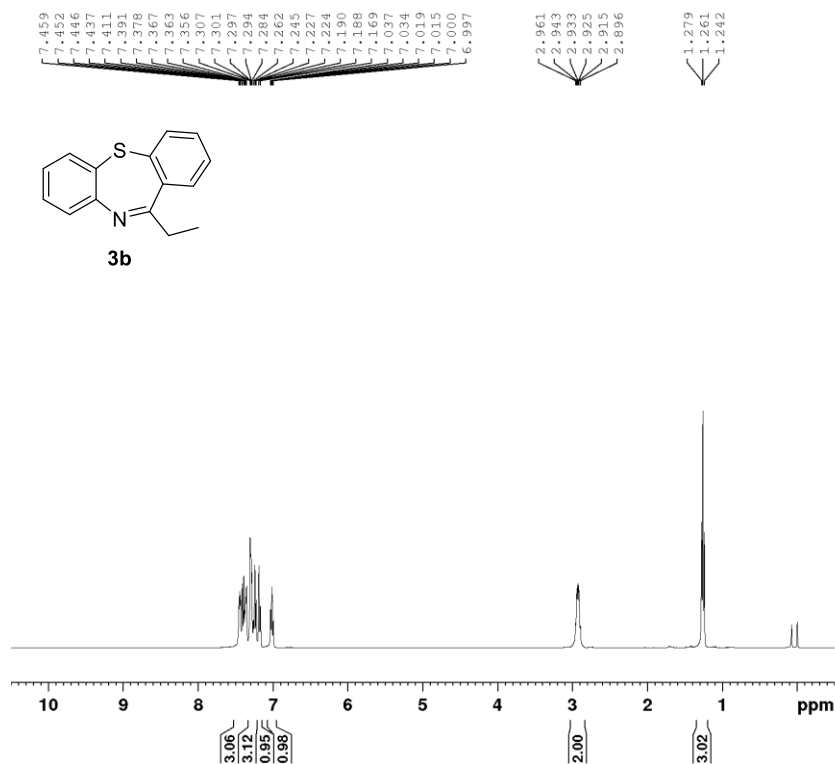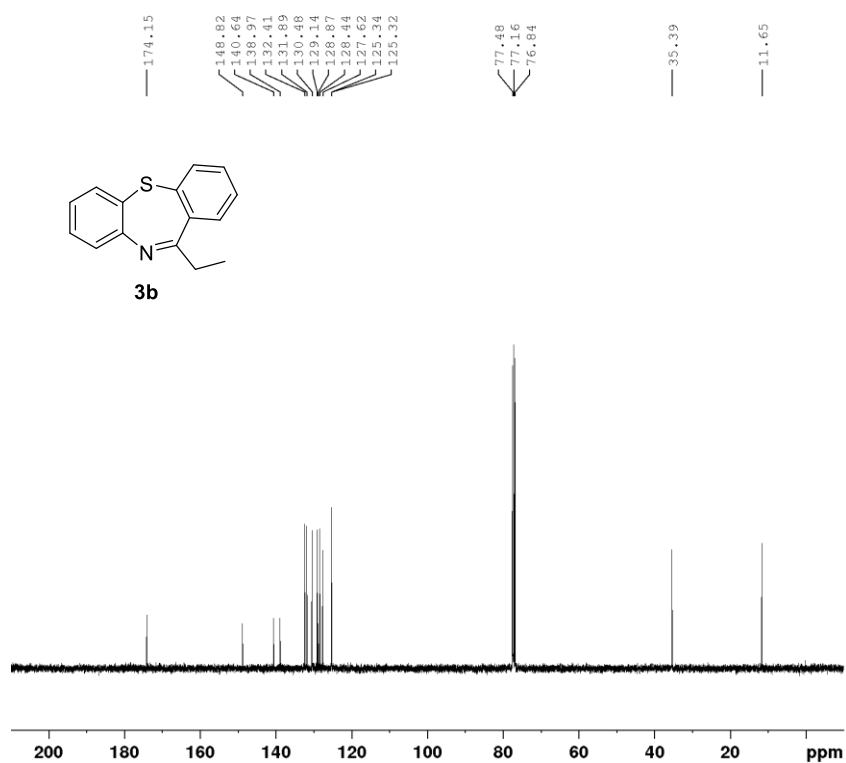

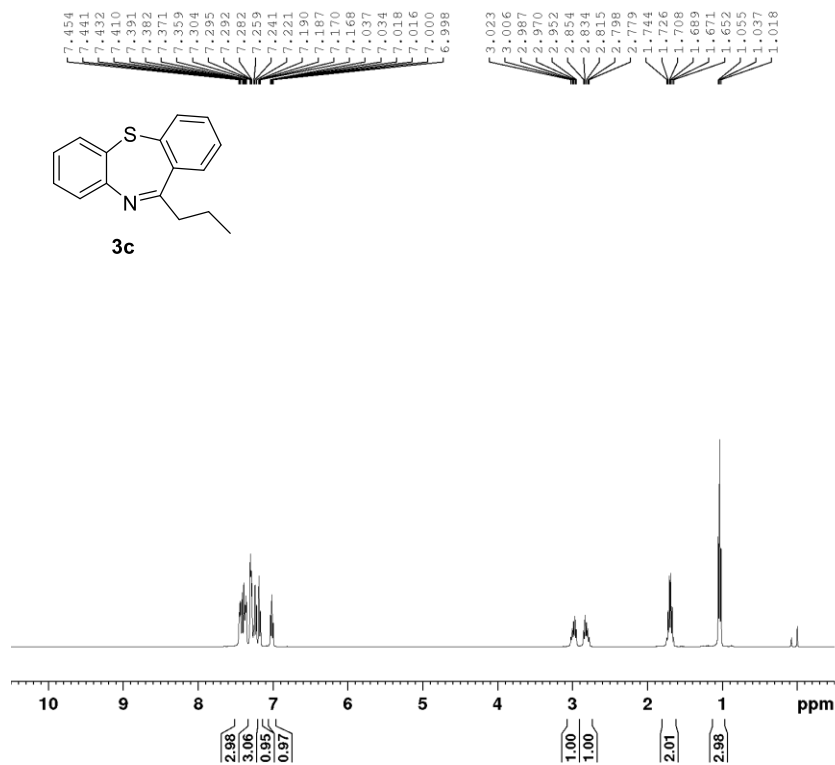

Current Data Parameters  
 NAME 2022-11-05-YZQ-S-n-Pr-Sub  
 EXPNO 1  
 PROCNO 1

F2 - Acquisition Parameters  
 Date\_ 20221105  
 Time 20.54 h  
 INSTRUM spect  
 PROBHD 5 mm PABBO BB/  
 PULPROG zg30  
 TD 32768  
 SOLVENT CDCl3  
 NS 16  
 DS 0  
 SWH 8012.820 Hz  
 FIDRES 0.489064 Hz  
 AQ 2.0447233 sec  
 RG 80.72  
 DW 62.400 usec  
 DE 6.50 usec  
 TE 299.1 K  
 D1 2.00000000 sec  
 TD0 1  
 SFO1 400.2424716 MHz  
 NUC1 1H  
 P1 14.30 usec  
 PLW1 12.00000000 W

F2 - Processing parameters  
 SI 65536  
 SF 400.2400159 MHz  
 WDN EM  
 SSB 0  
 LB 0.10 Hz  
 GB 0  
 PC 1.00

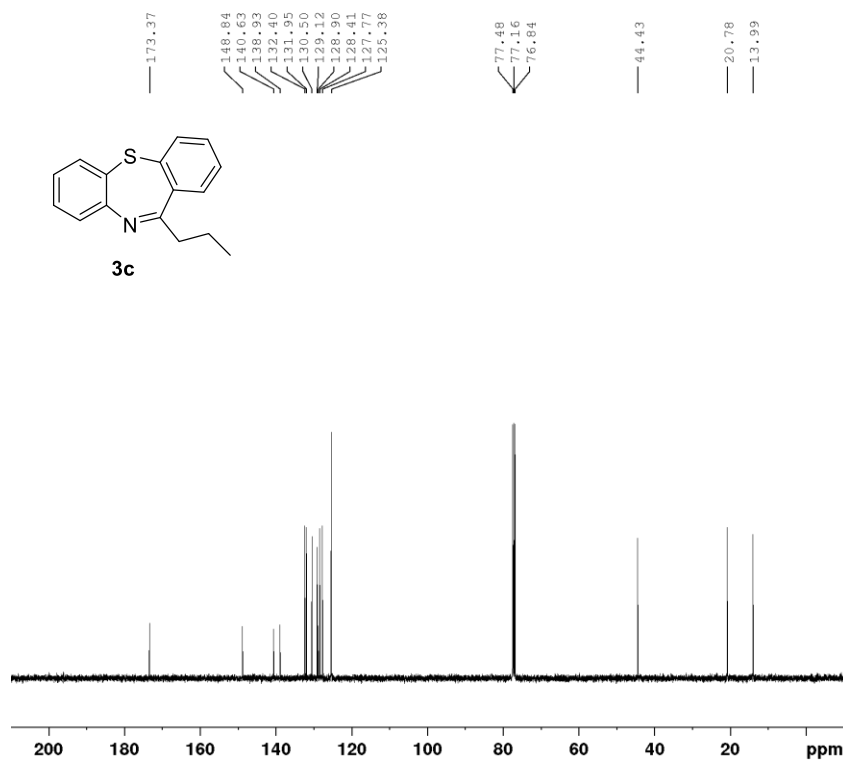

Current Data Parameters  
 NAME 2022-11-05-YZQ-S-n-Pr-Sub  
 EXPNO 2  
 PROCNO 1

F2 - Acquisition Parameters  
 Date\_ 20221105  
 Time 20.59 h  
 INSTRUM spect  
 PROBHD 5 mm PABBO BB/  
 PULPROG zgpg30  
 TD 65536  
 SOLVENT CDCl3  
 NS 100  
 DS 4  
 SWH 24038.461 Hz  
 FIDRES 0.733596 Hz  
 AQ 1.3631488 sec  
 RG 205.33  
 DW 20.800 usec  
 DE 6.50 usec  
 TE 299.7 K  
 D1 2.00000000 sec  
 d11 0.03000000 sec  
 DELTA 1.89999998 sec  
 TD0 1  
 SFO1 100.6504916 MHz  
 NUC1 13C  
 P1 10.00 usec  
 PLW1 54.00000000 W  
 SFO2 400.2416010 MHz  
 NUC2 1H  
 CPDPRG2 waltz16  
 PCPD2 90.00 usec  
 PLW2 12.00000000 W  
 PLW12 0.30294999 W  
 PLW13 0.24539000 W

F2 - Processing parameters  
 SI 32768  
 SF 100.6404185 MHz  
 WDN EM  
 SSB 0  
 LB 1.00 Hz  
 GB 0  
 PC 1.40



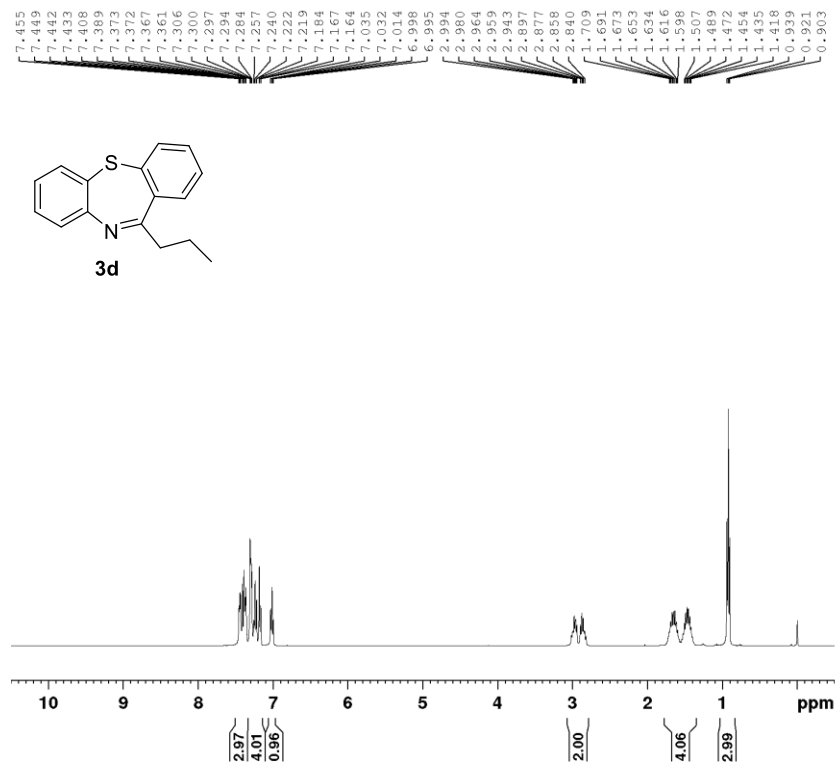

Current Data Parameters  
 NAME 2022-11-05-YZQ-S-n-Bu-Sub  
 EXPNO 1  
 PROCNO 1

F2 - Acquisition Parameters  
 Date\_ 20221105  
 Time 21.04 h  
 INSTRUM spect  
 PROBHD 5 mm PABBO BB/  
 PULPROG zg30  
 TD 32768  
 SOLVENT CDC13  
 NS 16  
 DS 0  
 SWH 8012.820 Hz  
 FIDRES 0.489064 Hz  
 AQ 2.0447233 sec  
 RG 80.72  
 DW 62.400 usec  
 DE 6.50 usec  
 TE 299.1 K  
 D1 2.00000000 sec  
 TDO 1  
 SFO1 400.2424716 MHz  
 NUC1 1H  
 P1 14.30 usec  
 PLW1 12.00000000 W

F2 - Processing parameters  
 SI 65536  
 SF 400.2400157 MHz  
 WDW EM  
 SSB 0  
 LB 0.30 Hz  
 GB 0  
 PC 1.00

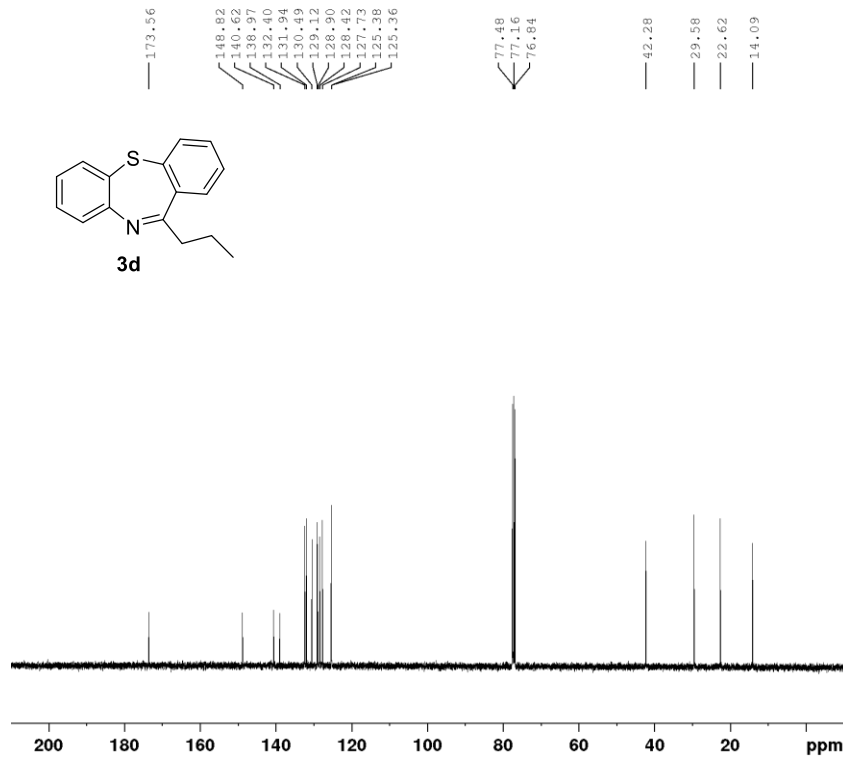

Current Data Parameters  
 NAME 2022-11-05-YZQ-S-n-Bu-Sub  
 EXPNO 2  
 PROCNO 1

F2 - Acquisition Parameters  
 Date\_ 20221105  
 Time 21.05 h  
 INSTRUM spect  
 PROBHD 5 mm PABBO BB/  
 PULPROG zgpg30  
 TD 65536  
 SOLVENT CDC13  
 NS 100  
 DS 4  
 SWH 24038.461 Hz  
 FIDRES 0.733596 Hz  
 AQ 1.3631488 sec  
 RG 206.33  
 DW 20.800 usec  
 DE 6.50 usec  
 TE 299.5 K  
 D1 2.00000000 sec  
 d11 0.03000000 sec  
 DELTA 1.89999998 sec  
 TDO 1  
 SFO1 100.6504916 MHz  
 NUC1 13C  
 P1 10.00 usec  
 PLM1 54.00000000 W  
 SFO2 400.2416010 MHz  
 NUC2 1H  
 CPDPRG2 waltz16  
 PCPD2 90.00 usec  
 PLN2 12.00000000 W  
 PLW12 0.30294999 W  
 PLW13 0.24539000 W

F2 - Processing parameters  
 SI 32768  
 SF 100.6404180 MHz  
 WDW EM  
 SSB 0  
 LB 1.00 Hz  
 GB 0  
 PC 1.40

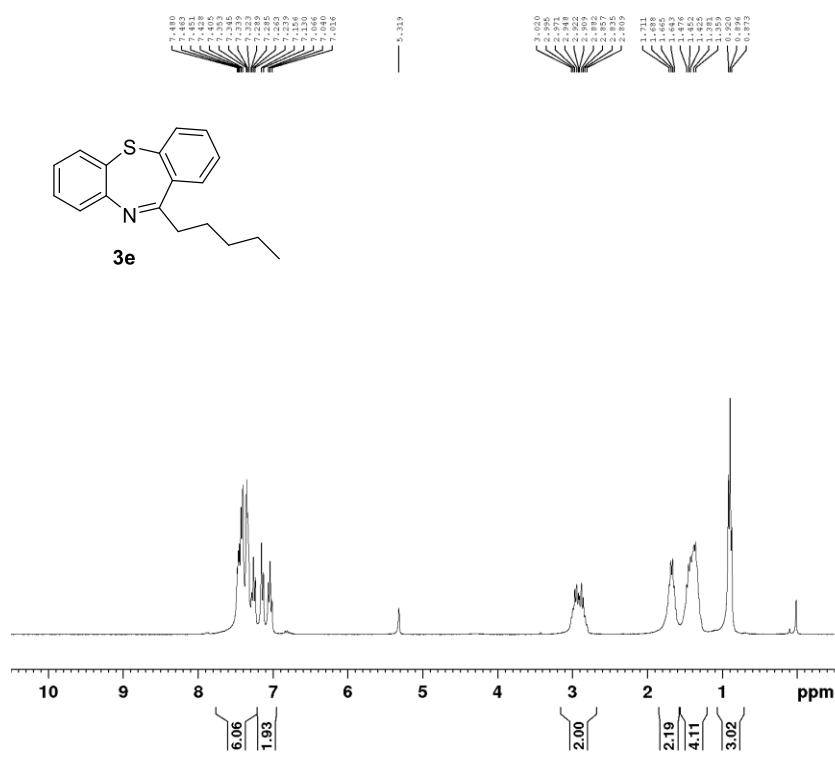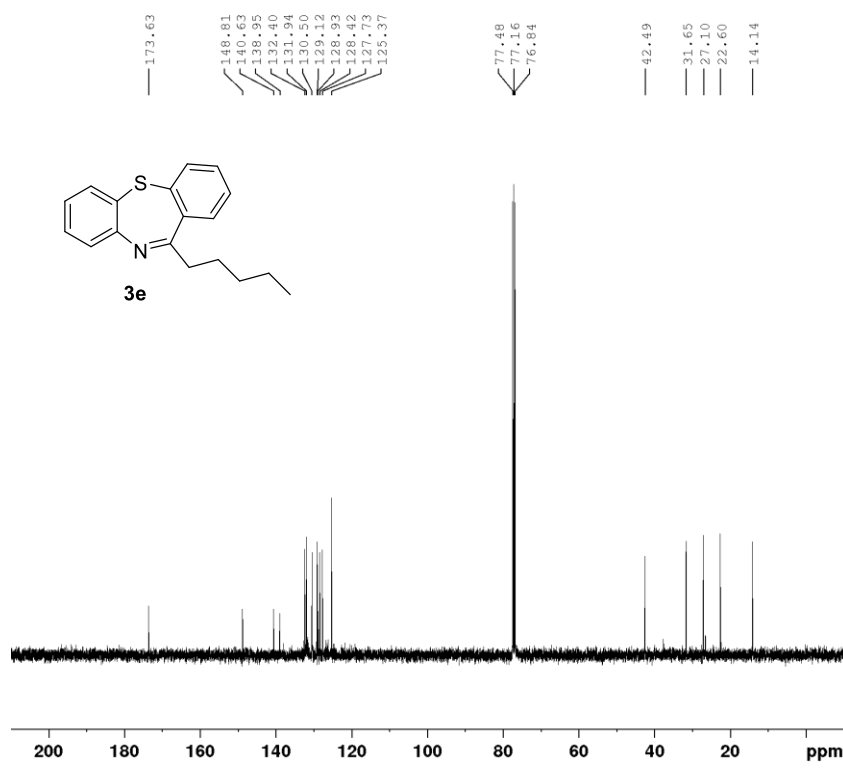

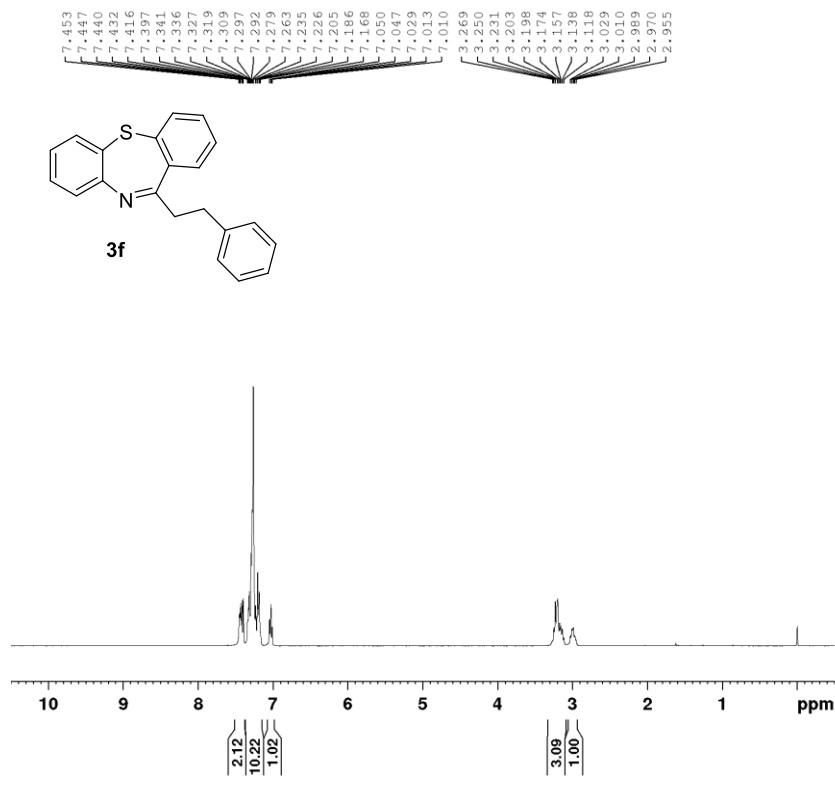

Current Data Parameters  
 NAME 2022-11-05-YZQ-S-CH2CH2Ph-Sub  
 EXPNO 1  
 PROCNO 1

F2 - Acquisition Parameters  
 Date\_ 20221105  
 Time 21.30 h  
 INSTRUM spect  
 PROBHD 5 mm PABBO BB/  
 PULPROG zg30  
 TD 32768  
 SOLVENT CDCl3  
 NS 16  
 DS 0  
 SWH 8012.820 Hz  
 FIDRES 0.489064 Hz  
 AQ 2.0447233 sec  
 RG 92.09  
 DW 62.400 usec  
 DE 6.50 usec  
 TE 299.1 K  
 D1 2.00000000 sec  
 TDO 1  
 SFO1 400.2424716 MHz  
 NUC1 1H  
 F1 14.30 usec  
 PLW1 12.00000000 W

F2 - Processing parameters  
 SI 65536  
 SF 400.2400231 MHz  
 WDW EM  
 SSB 0  
 LB 0.30 Hz  
 GB 0  
 PC 1.00

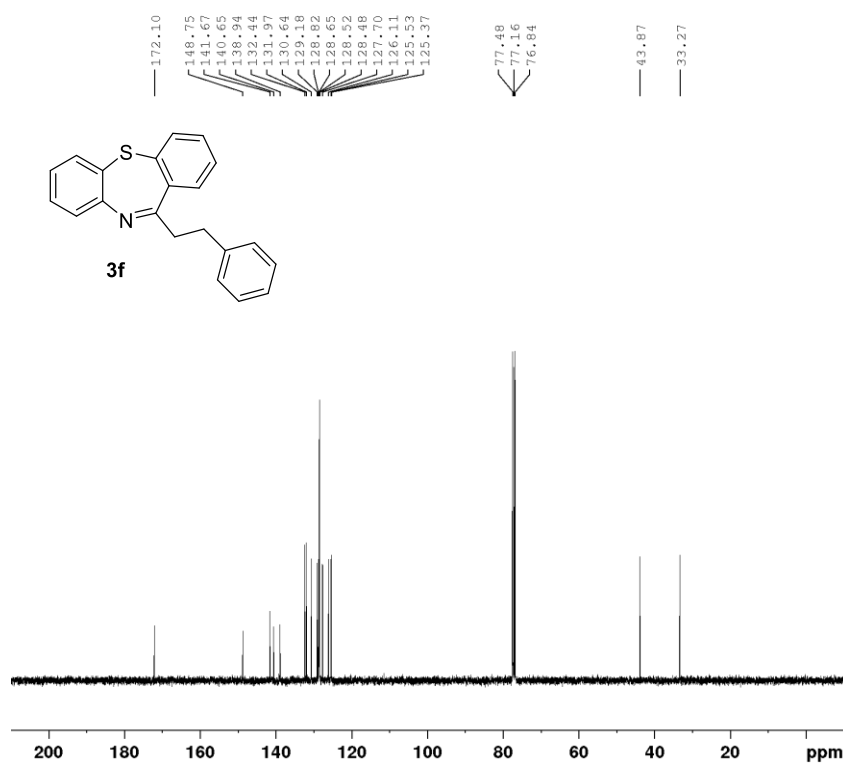

Current Data Parameters  
 NAME 2022-11-05-YZQ-S-CH2CH2Ph-Sub  
 EXPNO 2  
 PROCNO 1

F2 - Acquisition Parameters  
 Date\_ 20221105  
 Time 21.34 h  
 INSTRUM spect  
 PROBHD 5 mm PABBO BB/  
 PULPROG zgpg30  
 TD 65536  
 SOLVENT CDCl3  
 NS 100  
 DS 4  
 SWH 24038.461 Hz  
 FIDRES 0.733596 Hz  
 AQ 1.3631488 sec  
 RG 206.33  
 DW 20.800 usec  
 DE 6.50 usec  
 TE 299.7 K  
 D1 2.00000000 sec  
 d11 0.03000000 sec  
 DELTA 1.89999998 sec  
 TDO 1  
 SFO1 100.6504916 MHz  
 NUC1 13C  
 F1 10.00 usec  
 PLW1 54.00000000 W  
 SFO2 400.2416010 MHz  
 NUC2 1H  
 CPDPRG2 waltz16  
 PCPD2 90.00 usec  
 PLW2 12.00000000 W  
 PLW12 0.30294999 W  
 PLW13 0.24539000 W

F2 - Processing parameters  
 SI 32768  
 SF 100.6404198 MHz  
 WDW EM  
 SSB 0  
 LB 1.00 Hz  
 GB 0  
 PC 1.40

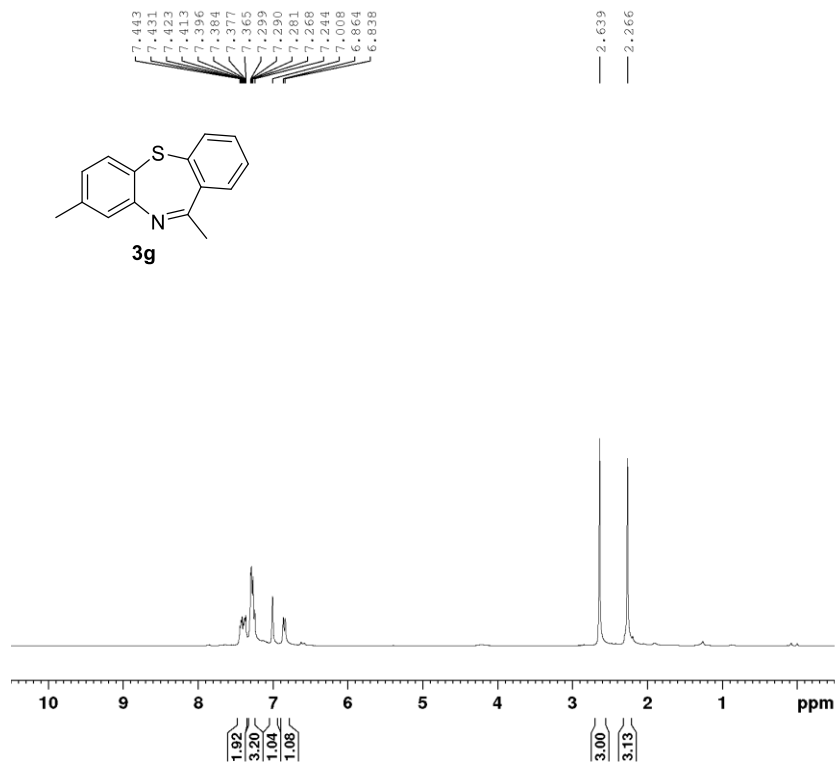

```

Current Data Parameters
NAME      2022-10-27-YZQ-S-P-Me-left-Sul
EXPNO    1
PROCNO   1

F2 - Acquisition Parameters
Date_    20211029
Time     11.33 h
INSTRUM  spect
PROBHD   5 mm DUL 13C-1
PULPROG  zg30
TD        65536
SOLVENT  CDCl3
NS        16
DS        2
SWH       6009.615 Hz
FIDRES    0.183399 Hz
AQ        5.4525952 sec
RG         142.81
DM        83.200 usec
DE         6.50 usec
TE        298.2 K
D1        1.00000000 sec
TDO       1
SFO1     300.1318534 MHz
NUC1      1H
F1        8.00 usec
PLW1     18.00000000 W

F2 - Processing parameters
SI        65536
SF        300.1300120 MHz
WDW       EM
SSB       0
LB        0.30 Hz
GB        0
PC        1.00
  
```

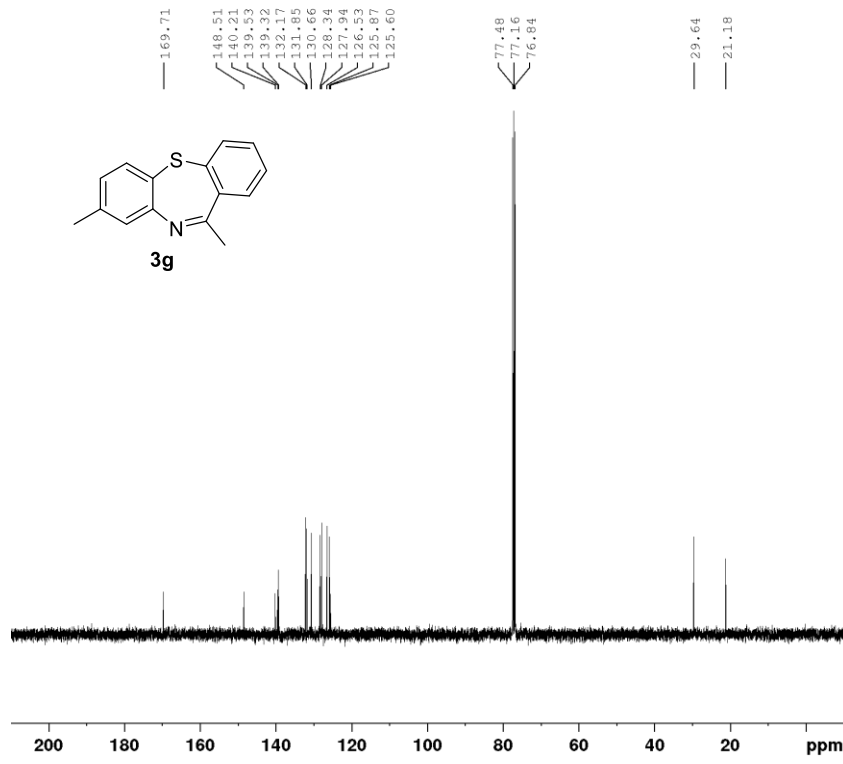

```

Current Data Parameters
NAME      2022-10-27-YZQ-S-P-Me-left-Sub
EXPNO    2
PROCNO   1

F2 - Acquisition Parameters
Date_    20221027
Time     16.51 h
INSTRUM  spect
PROBHD   5 mm PABBO BB/
PULPROG  zgpg30
TD        65536
SOLVENT  CDCl3
NS        128
DS        4
SWH       24038.461 Hz
FIDRES    0.733596 Hz
AQ        1.3631488 sec
RG         206.33
DM        20.800 usec
DE         6.50 usec
TE        299.0 K
D1        2.00000000 sec
d11       0.03000000 sec
DELTA     1.89999998 sec
TDO       1
SFO1     100.6504916 MHz
NUC1      13C
F1        10.00 usec
PLW1     54.00000000 W
SFO2     400.2416010 MHz
NUC2      1H
CPDPRG2  waltz16
PCPD2     90.00 usec
PLW2     12.00000000 W
PLW12    0.30294999 W
PLW13    0.24539000 W

F2 - Processing parameters
SI        32768
SF        100.6404171 MHz
WDW       EM
SSB       0
LB        1.00 Hz
GB        0
PC        1.40
  
```

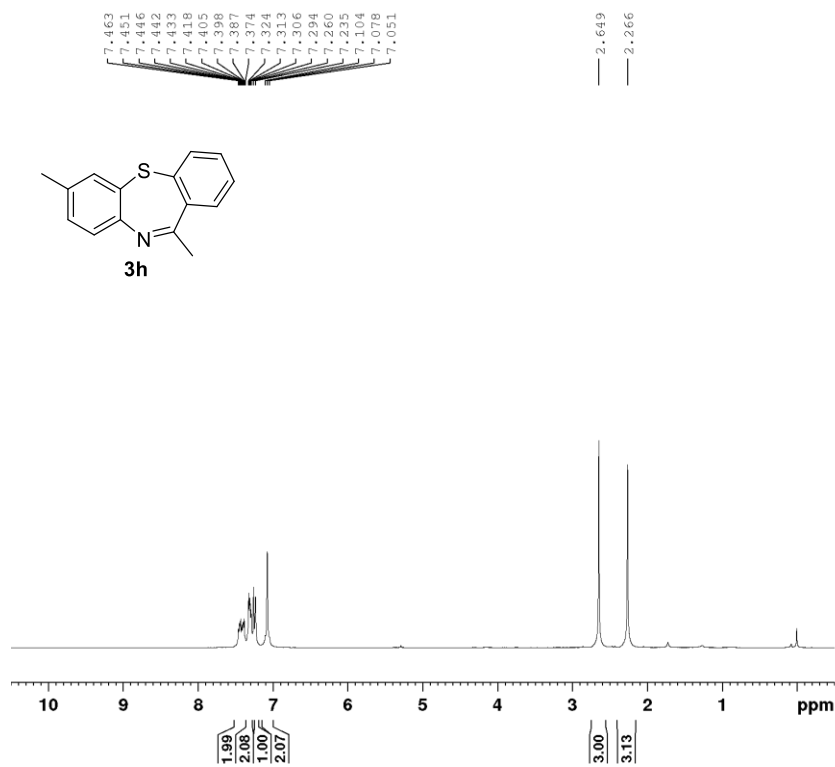

Current Data Parameters  
 NAME 2022-10-28-Y2Q-S-Left-M-CH3-Sub  
 EXPNO 1  
 PROCNO 1

F2 - Acquisition Parameters  
 Date\_ 20221028  
 Time 13.40 h  
 INSTRUM spect  
 PROBHD 5 mm DUL 130-1  
 PULPROG zg30  
 TD 65536  
 SOLVENT CDCl3  
 NS 16  
 DS 2  
 SWH 6009.615 Hz  
 FIDRES 0.183399 Hz  
 AQ 5.4525952 sec  
 RG 209.69  
 DW 83.200 usec  
 DE 6.50 usec  
 TE 298.3 K  
 D1 1.00000000 sec  
 TD0 1  
 SFO1 300.1318534 MHz  
 NUC1 1H  
 P1 8.00 usec  
 PLW1 18.00000000 W

F2 - Processing parameters  
 SI 65536  
 SF 300.1300071 MHz  
 WDW EM  
 SSB 0  
 LB 0.30 Hz  
 GB 0  
 PC 1.00

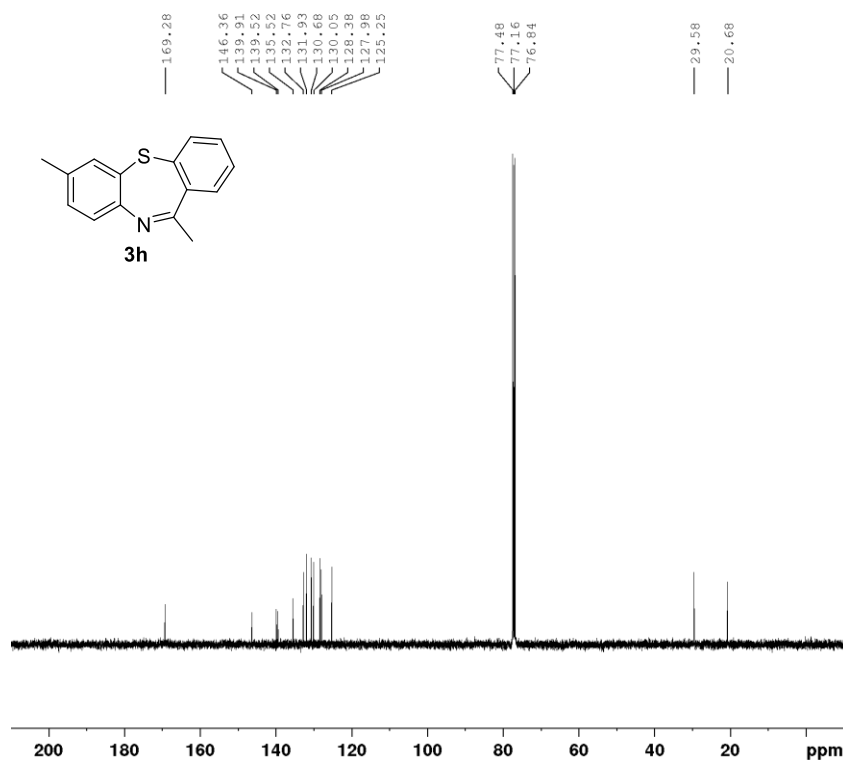

Current Data Parameters  
 NAME 2022-10-28-Y2Q-S-Left-M-CH3-Sub  
 EXPNO 2  
 PROCNO 1

F2 - Acquisition Parameters  
 Date\_ 20221028  
 Time 15.57 h  
 INSTRUM spect  
 PROBHD 5 mm PABBO BB/  
 PULPROG zgpg30  
 TD 65536  
 SOLVENT CDCl3  
 NS 200  
 DS 4  
 SWH 24038.461 Hz  
 FIDRES 0.733596 Hz  
 AQ 1.3631488 sec  
 RG 206.33  
 DW 20.800 usec  
 DE 6.50 usec  
 TE 299.9 K  
 D1 2.00000000 sec  
 d11 0.03000000 sec  
 DELTA 1.89999998 sec  
 TD0 1  
 SFO1 100.6504916 MHz  
 NUC1 13C  
 P1 10.00 usec  
 PLW1 54.00000000 W  
 SFO2 400.2416010 MHz  
 NUC2 1H  
 CPDPRG2 waltz16  
 PCPD2 90.00 usec  
 PLW2 12.00000000 W  
 PLW12 0.30294999 W  
 PLW13 0.24589000 W

F2 - Processing parameters  
 SI 32768  
 SF 100.6404160 MHz  
 WDW EM  
 SSB 0  
 LB 1.00 Hz  
 GB 0  
 PC 1.40

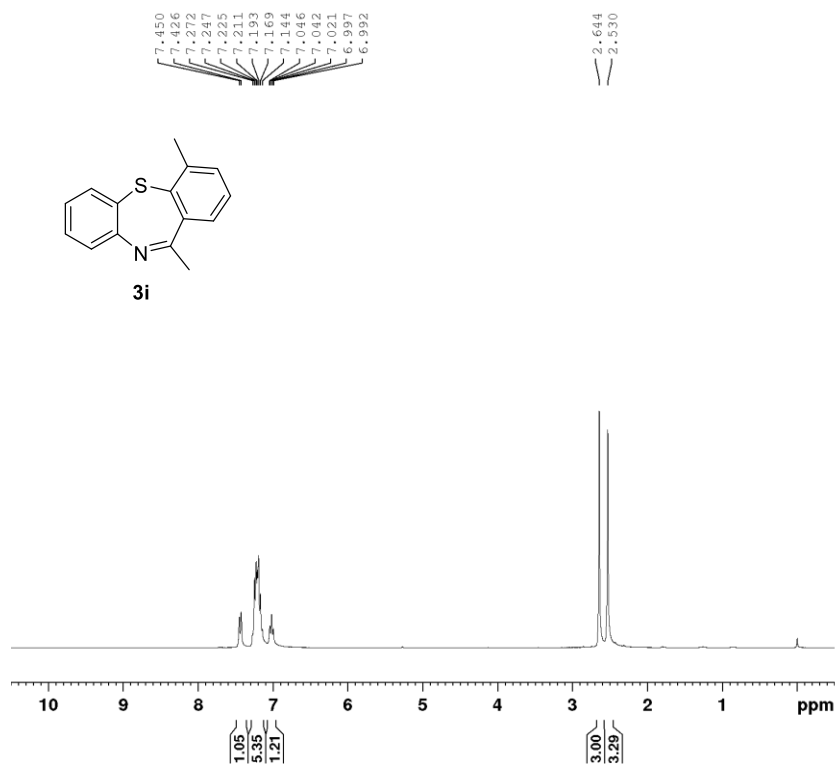

Current Data Parameters  
NAME 2022-10-27-Y2Q-8-0-Me-(right)-Sub  
EXPNO 1  
PROCNO 1

F2 - Acquisition Parameters  
Date\_ 20221027  
Time 14.01 h  
INSTRUM spect  
PROBHD 5 mm DUL 130-1  
PULPROG zg30  
TD 65536  
SOLVENT CDCl3  
NS 8  
DS 2  
SWH 6009.615 Hz  
FIDRES 0.188399 Hz  
AQ 5.452582 sec  
RG 186.23  
DM 83.200 usec  
DE 6.50 usec  
TE 298.2 K  
D1 1.0000000 sec  
TDO 1  
SFO1 300.1318534 MHz  
NUC1 1H  
P1 8.00 usec  
PLW1 18.0000000 W

F2 - Processing parameters  
SI 65536  
SF 300.1300113 MHz  
WDW EM  
SSB 0  
LB 0.30 Hz  
GB 0  
PC 1.00

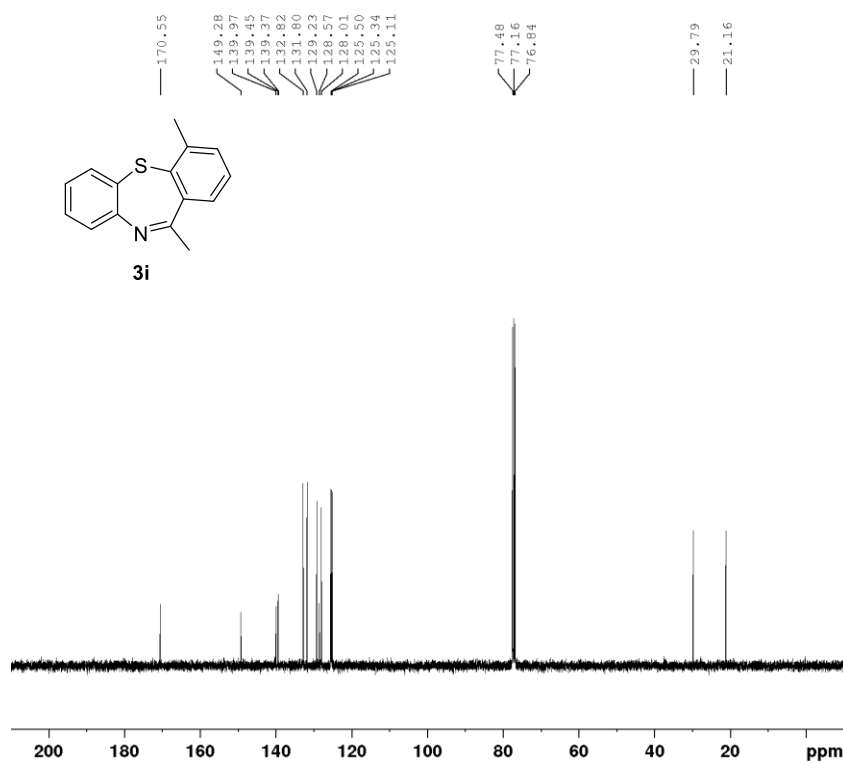

Current Data Parameters  
NAME 2022-10-27-Y2Q-8-0-Me-(right)-Sub  
EXPNO 2  
PROCNO 1

F2 - Acquisition Parameters  
Date\_ 20221027  
Time 16.38 h  
INSTRUM spect  
PROBHD 5 mm PABBO BB/  
PULPROG zgpg30  
TD 65536  
SOLVENT CDCl3  
NS 64  
DS 4  
SWH 24038.461 Hz  
FIDRES 0.733596 Hz  
AQ 1.3631468 sec  
RG 206.33  
DM 20.800 usec  
DE 4.50 usec  
TE 298.2 K  
D1 2.0000000 sec  
d11 0.0300000 sec  
DELTA 1.89999998 sec  
TDO 1  
SFO1 100.6504916 MHz  
NUC1 13C  
P1 11.00 usec  
PLW1 54.0000000 W  
SFO2 400.2416010 MHz  
NUC2 1H  
CPDPRG2 waltz16  
PCPD2 90.00 usec  
PLM2 12.0000000 W  
PLM12 0.30294999 W  
PLM13 0.24539000 W

F2 - Processing parameters  
SI 24768  
SF 100.6404185 MHz  
WDW BH  
SSB 0  
LB 1.00 Hz  
GB 0  
PC 1.40

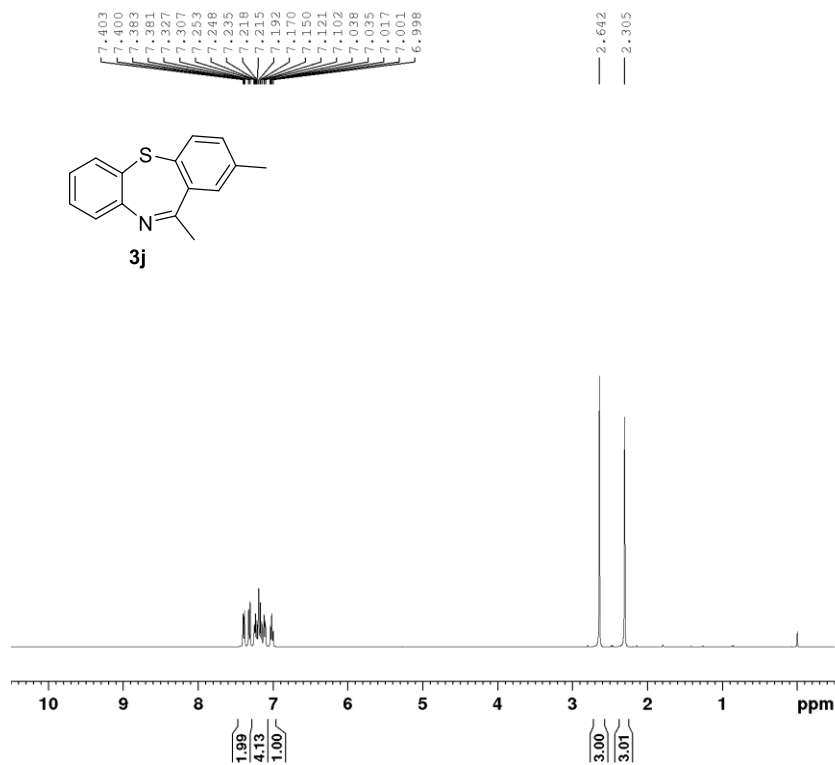

```

Current Data Parameters
NAME      2022-11-05-Y00-S-P-Me-right-Sub
EXPNO    1
PROCNO   1

F2 - Acquisition Parameters
Date_    20221105
Time     21.40 h
INSTRUM  spect
PROBHD   5 mm PABBO BB/
PULPROG  zg30
TD       32768
SOLVENT  CDCl3
NS       16
DS       0
SWH      8012.820 Hz
FIDRES   0.489064 Hz
AQ       2.0447233 sec
RG       32.09
DW       62.400 usec
DE       6.50 usec
TE       299.1 K
D1       2.0000000 sec
TD0      1
SFO1     400.2424716 MHz
NUC1     1H
F1       141.30 usec
PLW1     12.0000000 W

F2 - Processing parameters
SI       65536
SF       400.2400148 MHz
WDW      EM
SSB      0
LB       0.30 Hz
GB       0
PC       1.00
  
```

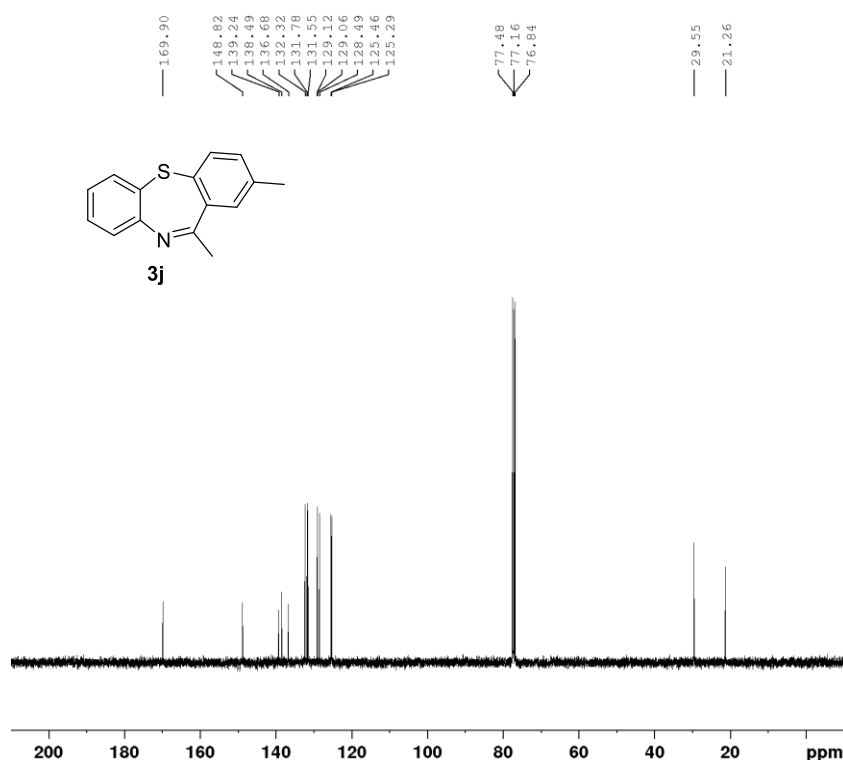

```

Current Data Parameters
NAME      2022-11-05-Y00-S-P-Me-right-Sub
EXPNO    2
PROCNO   1

F2 - Acquisition Parameters
Date_    20221105
Time     21.41 h
INSTRUM  spect
PROBHD   5 mm PABBO BB/
PULPROG  zgpg30
TD       65536
SOLVENT  CDCl3
NS       64
DS       4
SWH      24038.461 Hz
FIDRES   0.733596 Hz
AQ       1.3631488 sec
RG       206.33
DW       20.800 usec
DE       6.50 usec
TE       299.4 K
D1       2.0000000 sec
d11      0.0300000 sec
DELTA    1.89999998 sec
TD0      1
SFO1     100.6504916 MHz
NUC1     13C
F1       10.00 usec
PLM1     54.0000000 W
SFO2     400.2416010 MHz
NUC2     1H
CFPRG12  waltz16
FCPD2    90.00 usec
PLW2     12.0000000 W
PLM2     0.3629499 W
PLW3     0.2453900 W

F2 - Processing parameters
SI       32768
SF       100.6404184 MHz
WDW      EM
SSB      0
LB       1.00 Hz
GB       0
PC       1.40
  
```

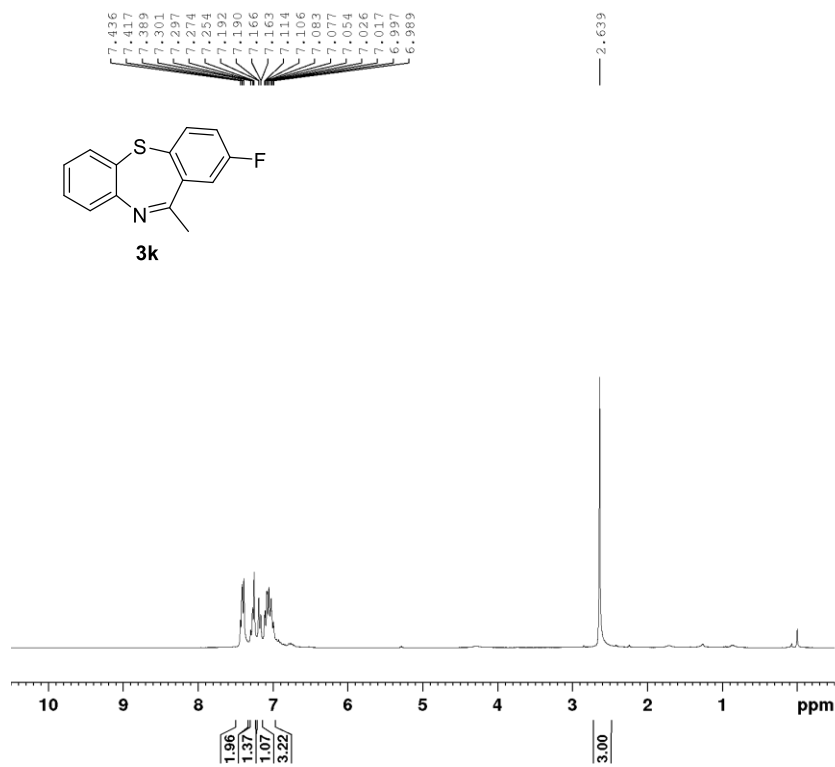

Current Data Parameters  
NAME 2022-10-28-YZQ-S-Right-P-F-Sul  
EXPNO 2  
PROCNO 1

F2 - Acquisition Parameters  
Date\_ 20221028  
Time\_ 13.48 h  
INSTRUM spect  
PROBHD 5 mm DUL 13C-1  
PULPROG zg30  
TD 65536  
SOLVENT CDCl3  
NS 16  
DS 2  
SWH 6009.615 Hz  
FIDRES 0.183399 Hz  
AQ 5.4525952 sec  
RG 209.09  
DM 83.200 usec  
DE 6.50 usec  
TE 298.3 K  
D1 1.00000000 sec  
TDO 1  
SFO1 300.1318534 MHz  
NUC1 1H  
F1 8.00 usec  
PLW1 18.00000000 W

F2 - Processing parameters  
SI 65536  
SF 300.1300090 MHz  
WDW EM  
SSB 0  
LB 0.30 Hz  
GB 0  
PC 1.00

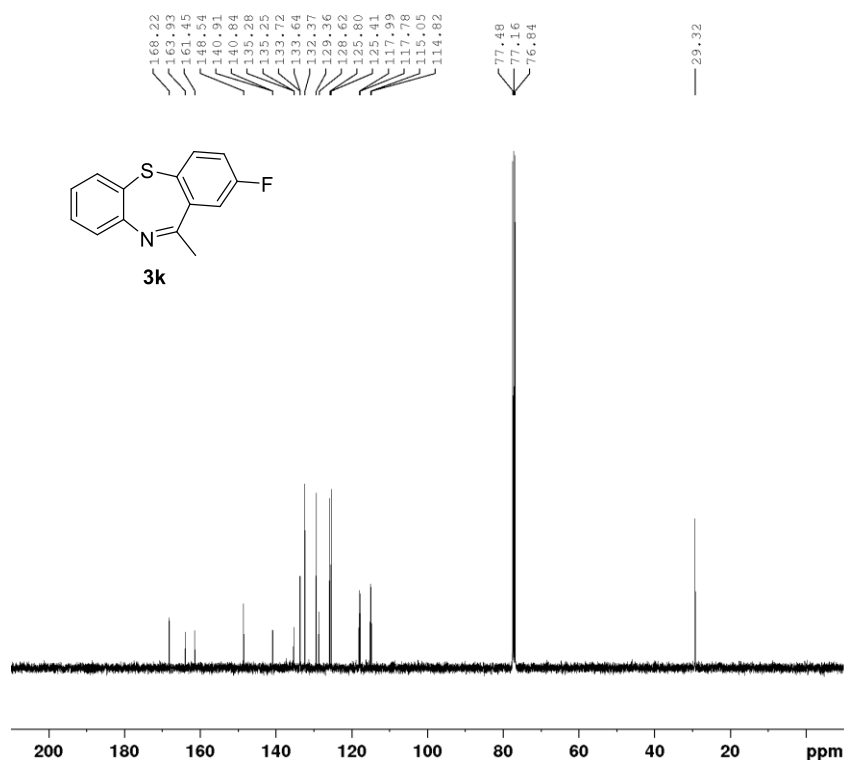

Current Data Parameters  
NAME 2022-10-28-YZQ-S-Right-P-F-Sub  
EXPNO 1  
PROCNO 1

F2 - Acquisition Parameters  
Date\_ 20221028  
Time\_ 14.57 h  
INSTRUM spect  
PROBHD 5 mm PABBO BB/  
PULPROG zgpg30  
TD 65536  
SOLVENT CDCl3  
NS 200  
DS 4  
SWH 24038.461 Hz  
FIDRES 0.733596 Hz  
AQ 1.3631488 sec  
RG 206.33  
DM 20.800 usec  
DE 6.50 usec  
TE 299.8 K  
D1 2.00000000 sec  
d11 0.03000000 sec  
DELTA 1.89999998 sec  
TDO  
SFO1 100.6504914 MHz  
NUC1 13C  
F1 10.00 usec  
PLM1 54.00000000 W  
SFO2 400.2416010 MHz  
NUC2 1H  
CPDPRG2 waltz16  
PCPD2 90.00 usec  
PLW2 12.00000000 W  
PLW12 0.30294999 W  
PLM13 0.24539000 W

F2 - Processing parameters  
SI 32768  
SF 100.6404178 MHz  
WDW EM  
SSB 0  
LB 1.00 Hz  
GB 0  
PC 1.40



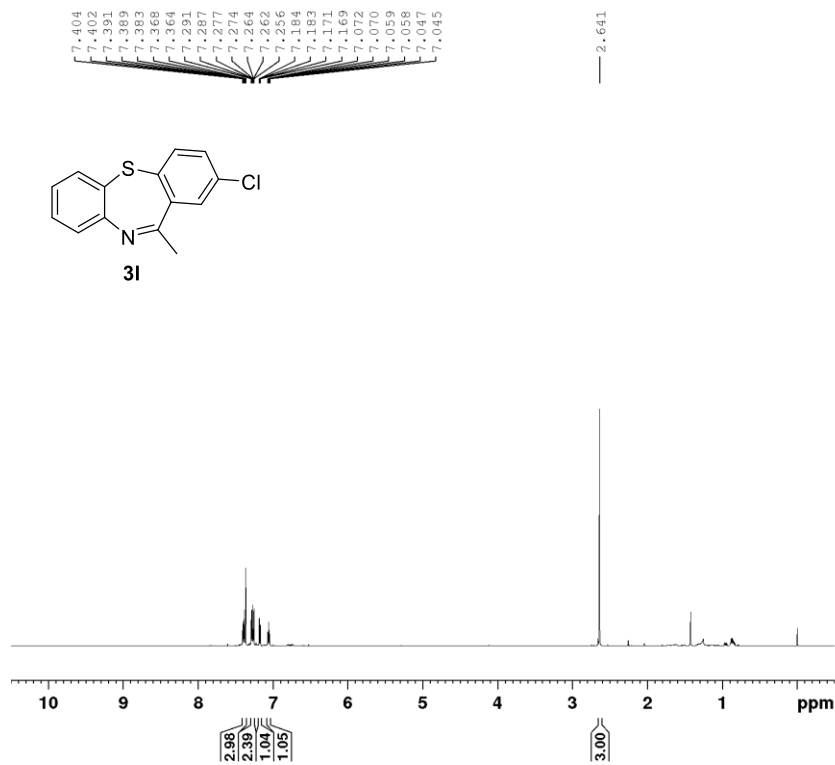

Current Data Parameters  
 NAME 2022-10-27-Y2Q-S-P-Cl-right-Sub  
 EXPNO 1  
 PROCNO 1

F2 - Acquisition Parameters  
 Date\_ 20221024  
 Time 22.59  
 INSTRUM spect  
 PROBHD 5 mm PABBO BB/  
 PULPROG zg30  
 TD 65536  
 SOLVENT cdcl3  
 NS 8  
 DS 0  
 SWH 9615.395 Hz  
 FIDRES 0.146719 Hz  
 AQ 3.4078720 sec  
 RG 69.87  
 DW 52.000 usec  
 DE 6.50 usec  
 TE 298.0 K  
 D1 1.00000000 sec  
 TDO 1

----- CHANNEL f1 -----  
 SFO1 600.1739011 MHz  
 NUC1 1H  
 P1 9.36 usec  
 PLW1 28.00000000 W

F2 - Processing parameters  
 SI 65536  
 SF 600.1700170 MHz  
 WDW EM  
 SSB 0  
 LB 0.30 Hz  
 GB 0  
 PC 1.00

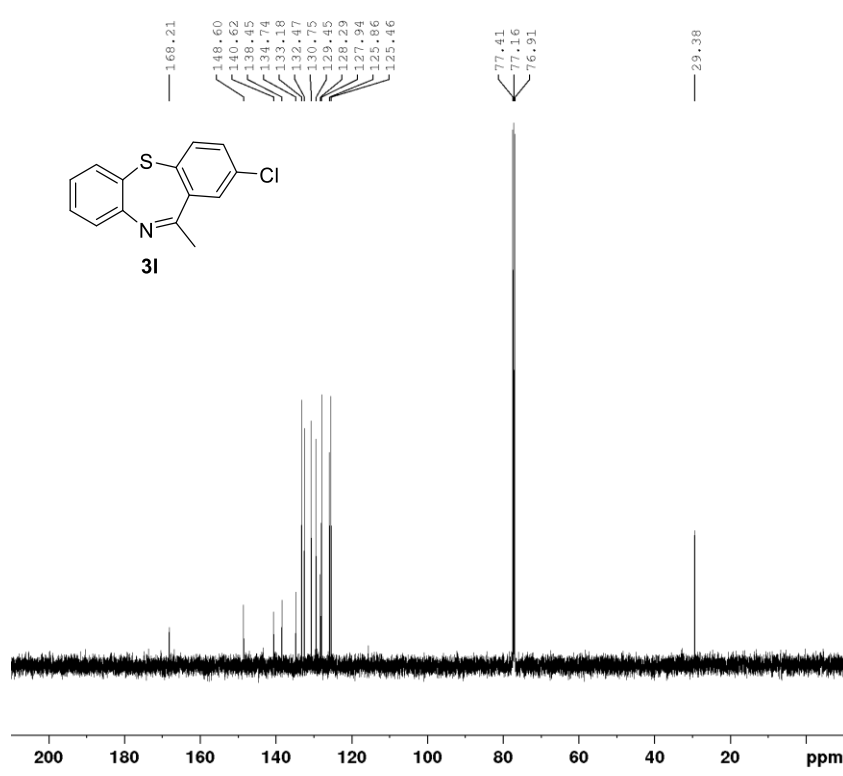

Current Data Parameters  
 NAME 2022-10-27-Y2Q-S-P-Cl-right-Sub  
 EXPNO 2  
 PROCNO 1

F2 - Acquisition Parameters  
 Date\_ 20221027  
 Time 12.54 h  
 INSTRUM spect  
 PROBHD 5 mm PADUL 13C  
 PULPROG zgpg30  
 TD 65536  
 SOLVENT cdcl3  
 NS 128  
 DS 4  
 SWH 29761.904 Hz  
 FIDRES 0.908261 Hz  
 AQ 1.1010048 sec  
 RG 192.39  
 DW 16.800 usec  
 DE 6.50 usec  
 TE 0 K  
 D1 2.00000000 sec  
 d11 0.03000000 sec  
 DELTA 1.89999998 sec  
 TDO 1  
 SFO1 125.7703637 MHz  
 NUC1 13C  
 P1 10.00 usec  
 PLW1 80.00000000 W  
 SFO2 500.1320005 MHz  
 NUC2 1H  
 CPDPRG2 waltz16  
 P1P2 80.00 usec  
 PLW2 20.00000000 W  
 PLW12 0.39903000 W  
 PLW13 0.25538000 W

F2 - Processing parameters  
 SI 32768  
 SF 125.7577688 MHz  
 WDW EM  
 SSB 0  
 LB 1.00 Hz  
 GB 0  
 PC 1.40

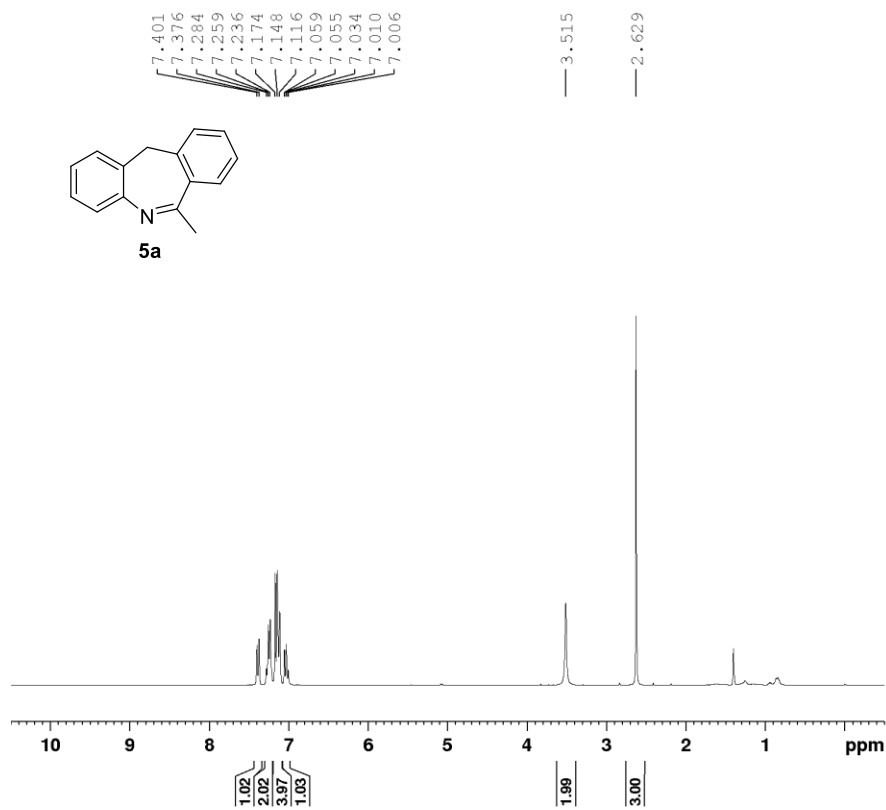

Current Data Parameters  
NAME 500M  
EXPNO 106  
PROCNO 1

F2 - Acquisition Parameters  
Date\_ 20210725  
Time 17.57 h  
INSTRUM spect  
PROBHD 5 mm DUL 13C-1  
PULPROG zg30  
TD 65536  
SOLVENT CDCl3  
NS 16  
DS 2  
SWH 6009.615 Hz  
FIDRES 0.183399 Hz  
AQ 5.4525952 sec  
RG 32.14  
DW 83.200 usec  
DE 6.50 usec  
TE 301.7 K  
D1 1.00000000 sec  
TD0 1  
SFO1 300.1318534 MHz  
NUC1 1H  
P1 8.00 usec  
PLW1 18.00000000 W

F2 - Processing parameters  
SI 65536  
SF 300.1300402 MHz  
WDW EM  
SSB 0  
LB 0.30 Hz  
GB 0  
PC 1.00

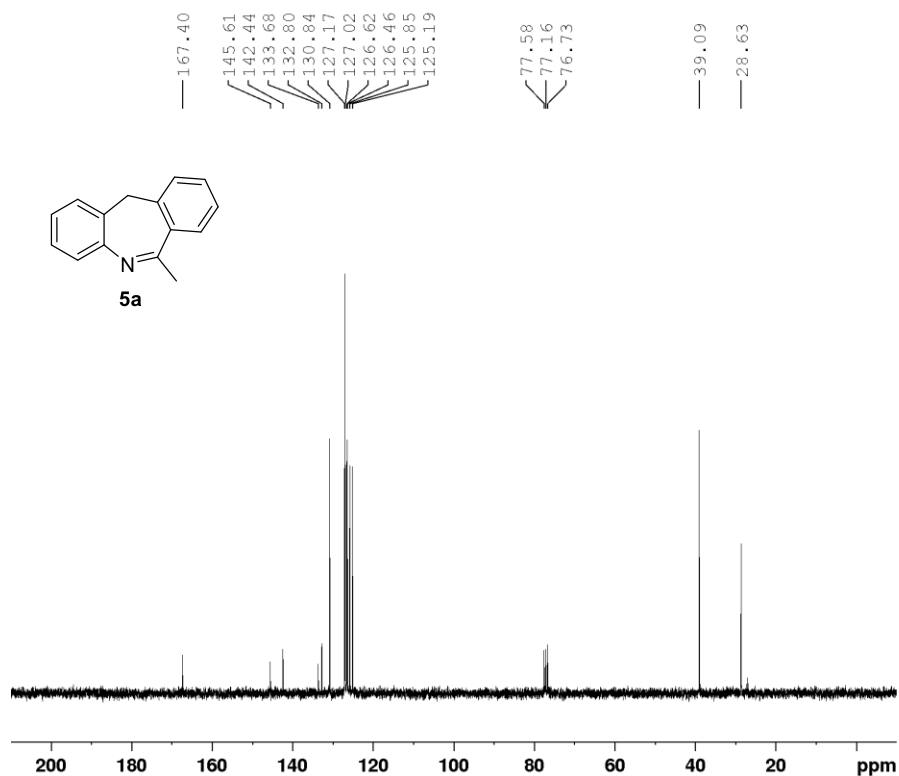

Current Data Parameters  
NAME 500M  
EXPNO 107  
PROCNO 1

F2 - Acquisition Parameters  
Date\_ 20210725  
Time 8.56 h  
INSTRUM spect  
PROBHD 5 mm DUL 13C-1  
PULPROG zgpg30  
TD 65536  
SOLVENT CDCl3  
NS 22  
DS 4  
SWH 18028.846 Hz  
FIDRES 0.550197 Hz  
AQ 1.8175317 sec  
RG 209.09  
DW 27.733 usec  
DE 6.50 usec  
TE 301.6 K  
D1 2.00000000 sec  
d11 0.03000000 sec  
DELTA 1.89999998 sec  
TD0 1  
SFO1 75.4752949 MHz  
NUC1 13C  
P1 11.00 usec  
PLW1 195.0000000 W  
SFO2 300.1312005 MHz  
NUC2 1H  
CPDPRG2 waltz16  
PCPD2 90.00 usec  
PLW2 14.00000000 W  
PLW12 0.17284000 W  
PLW13 0.14000000 W

F2 - Processing parameters  
SI 32768  
SF 75.4677459 MHz  
WDW EM  
SSB 0  
LB 1.00 Hz  
GB 0  
PC 1.40

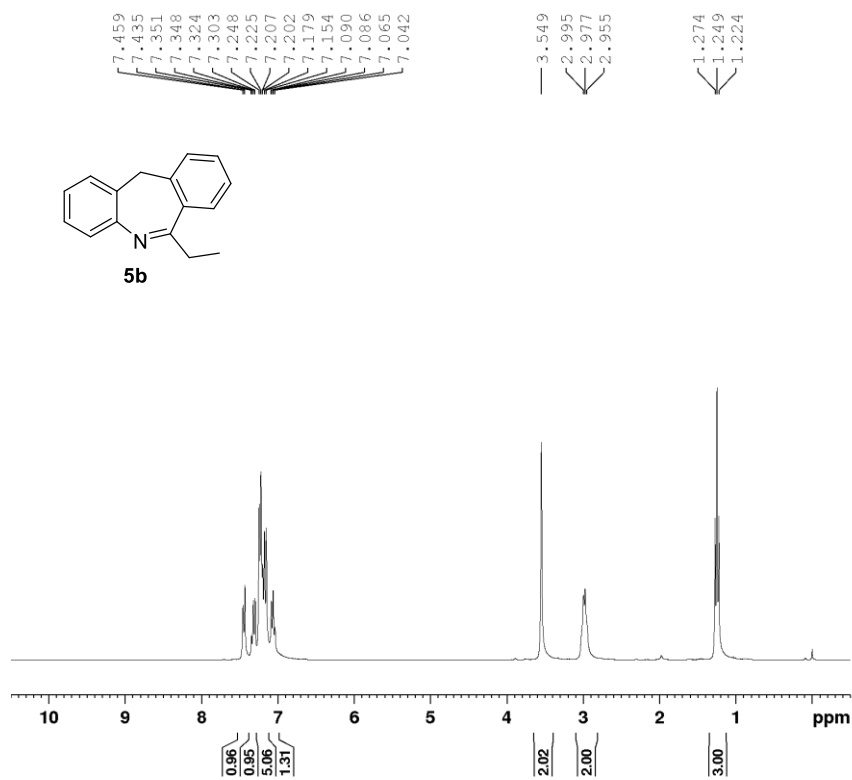

Current Data Parameters  
 NAME 500M  
 EXPNO 108  
 PROCNO 1

F2 - Acquisition Parameters  
 Date\_ 20221028  
 Time 13.57 h  
 INSTRUM spect  
 PROBHD 5 mm DUL 13C-1  
 PULPROG zg30  
 TD 65536  
 SOLVENT CDCl3  
 NS 16  
 DS 2  
 SWH 6009.615 Hz  
 FIDRES 0.183399 Hz  
 AQ 5.4525952 sec  
 RG 117.72  
 DW 83.200 usec  
 DE 6.50 usec  
 TE 298.3 K  
 D1 1.00000000 sec  
 TDO 1  
 SFO1 300.1318534 MHz  
 NUC1 1H  
 P1 8.00 usec  
 PLW1 18.00000000 W

F2 - Processing parameters  
 SI 65536  
 SF 300.1300195 MHz  
 WDW EM  
 SSB 0  
 LB 0.30 Hz  
 GB 0  
 PC 1.00

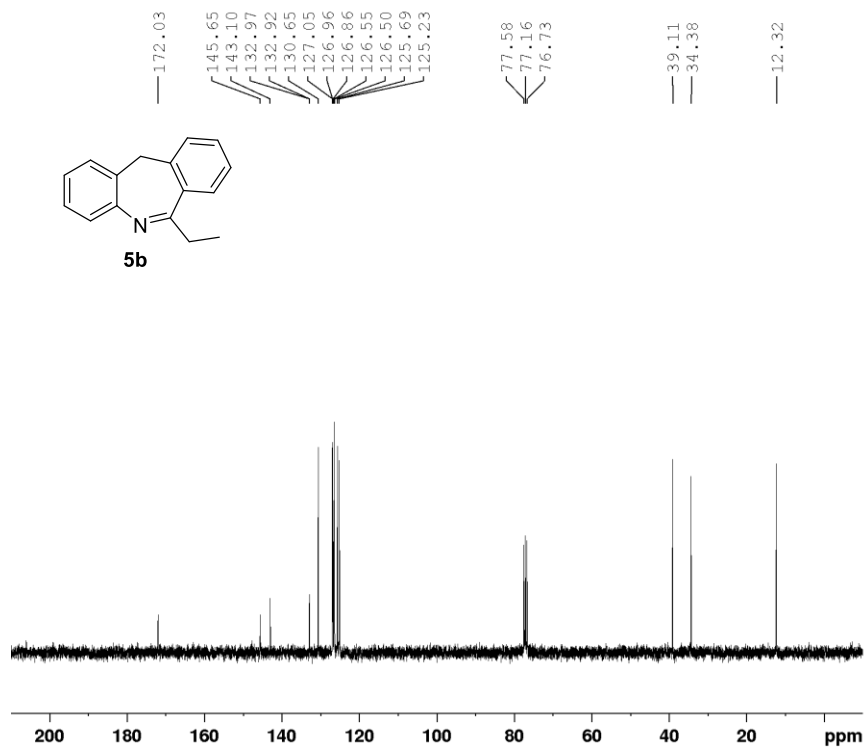

Current Data Parameters  
 NAME 500M  
 EXPNO 109  
 PROCNO 1

F2 - Acquisition Parameters  
 Date\_ 20221025  
 Time 8.42 h  
 INSTRUM spect  
 PROBHD 5 mm DUL 13C-1  
 PULPROG zgpg30  
 TD 65536  
 SOLVENT CDCl3  
 NS 82  
 DS 4  
 SWH 18028.846 Hz  
 FIDRES 0.550197 Hz  
 AQ 1.8175317 sec  
 RG 209.09  
 DW 27.733 usec  
 DE 6.50 usec  
 TE 298.3 K  
 D1 2.00000000 sec  
 c11 0.03000000 sec  
 DELTA 1.89999998 sec  
 TDO 1  
 SFO1 75.4752949 MHz  
 NUC1 13C  
 P1 11.00 usec  
 PLW1 195.0000000 W  
 SFO2 300.1312005 MHz  
 NUC2 1H  
 CPDPRG2 waltz16  
 PCD2 90.00 usec  
 PLW2 14.00000000 W  
 PLW12 0.17284000 W  
 PLW13 0.14000000 W

F2 - Processing parameters  
 SI 32768  
 SF 75.4677429 MHz  
 WDW EM  
 SSB 0  
 LB 1.00 Hz  
 GB 0  
 PC 1.40

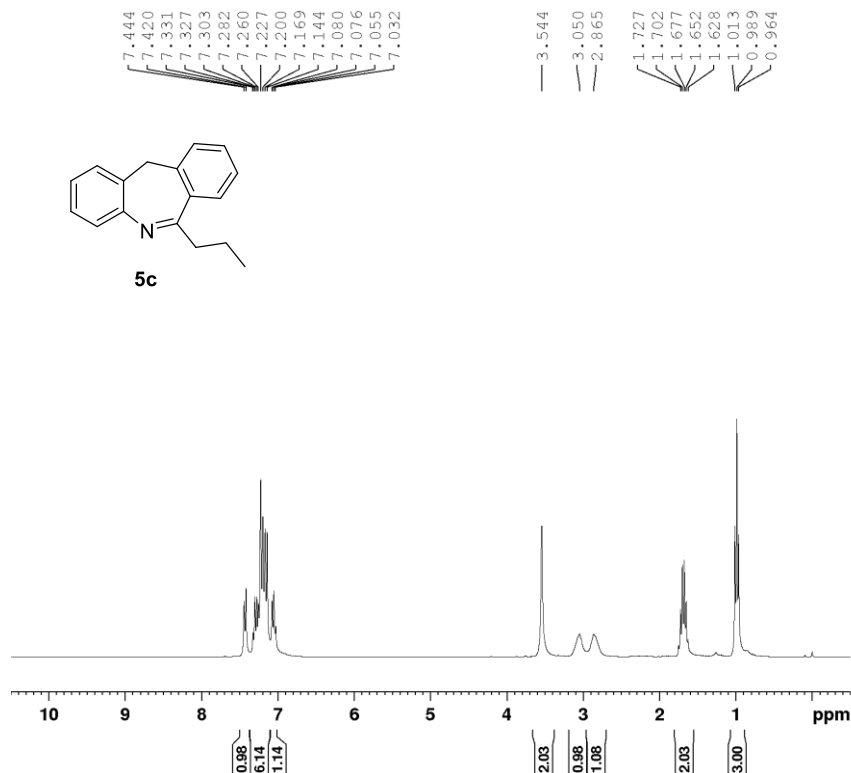

Current Data Parameters  
 NAME 500M  
 EXPNO 110  
 PROCNO 1

F2 - Acquisition Parameters  
 Date\_ 20221028  
 Time 14.01 h  
 INSTRUM spect  
 PROBHD 5 mm DUL 13C-1  
 PULPROG zg30  
 TD 65536  
 SOLVENT CDC13  
 NS 16  
 DS 2  
 SWH 6009.615 Hz  
 FIDRES 0.183399 Hz  
 AQ 5.4525952 sec  
 RG 66.2  
 DW 83.200 usec  
 DE 6.50 usec  
 TE 298.3 K  
 D1 1.0000000 sec  
 TD0 1  
 SFO1 300.1318534 MHz  
 NUC1 1H  
 P1 8.00 usec  
 PLW1 18.00000000 W

F2 - Processing parameters  
 SI 65536  
 SF 300.1300271 MHz  
 WDW EM  
 SSB 0  
 LB 0.30 Hz  
 GB 0  
 FC 1.00

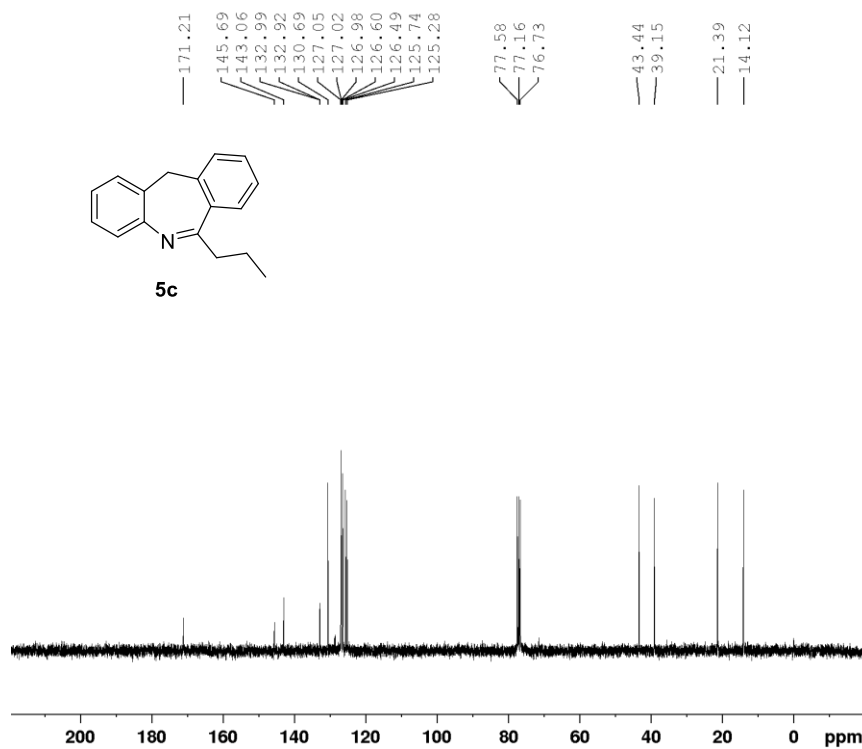

Current Data Parameters  
 NAME 500M  
 EXPNO 111  
 PROCNO 1

F2 - Acquisition Parameters  
 Date\_ 20221025  
 Time 8.52 h  
 INSTRUM spect  
 PROBHD 5 mm DUL 13C-1  
 PULPROG zgpg30  
 TD 65536  
 SOLVENT CDC13  
 NS 152  
 DS 4  
 SWH 18028.846 Hz  
 FIDRES 0.550197 Hz  
 AQ 1.8175317 sec  
 RG 209.09  
 DW 27.733 usec  
 DE 6.50 usec  
 TE 298.3 K  
 D1 2.0000000 sec  
 d11 0.0300000 sec  
 DELTA 1.89999998 sec  
 TD0 1  
 SFO1 75.4752949 MHz  
 NUC1 13C  
 P1 11.00 usec  
 PLW1 195.0000000 W  
 SFO2 300.1312005 MHz  
 NUC2 1H  
 CPDPRG [2] waltz16  
 PCED2 90.00 usec  
 PLN2 14.0000000 W  
 PLW2 0.17284000 W  
 PLW12 0.17284000 W  
 PLW13 0.14000000 W

F2 - Processing parameters  
 SI 32768  
 SF 75.4677412 MHz  
 WDW EM  
 SSB 0  
 LB 1.00 Hz  
 GB 0  
 FC 1.40

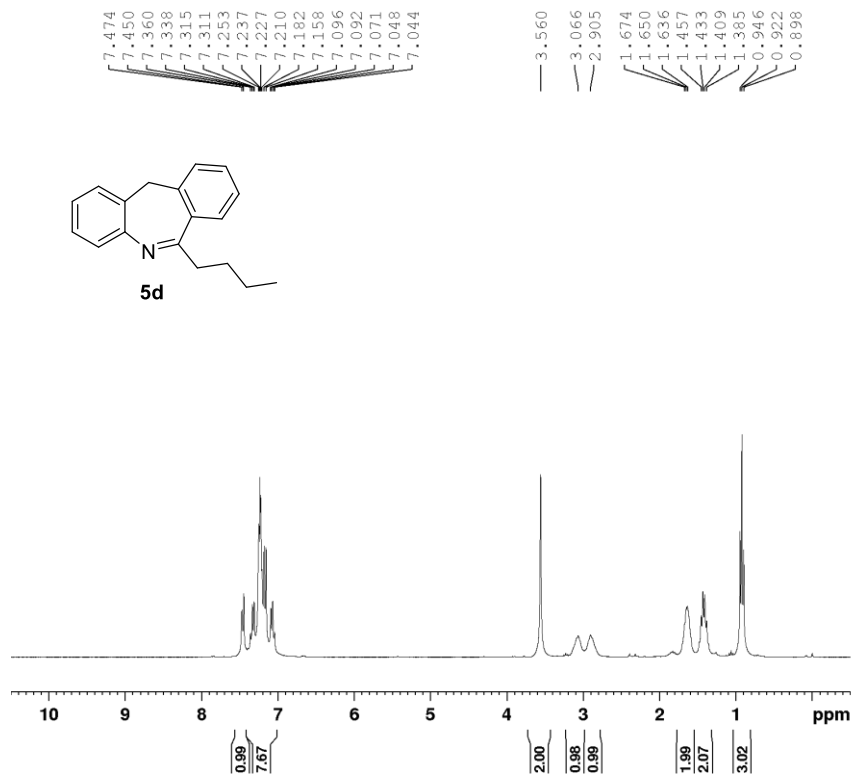

Current Data Parameters  
NAME 500M  
EXPNO 112  
PROCNO 1

F2 - Acquisition Parameters  
Date\_ 20221115  
Time 11.15 h  
INSTRUM spect  
PROBHD 5 mm DUL 13C-1  
PULPROG zg30  
TD 65536  
SOLVENT CDC13  
NS 16  
DS 2  
SWH 6009.615 Hz  
FIDRES 0.183399 Hz  
AQ 5.4525952 sec  
RG 126.88  
DW 83.200 usec  
DE 6.50 usec  
TE 0 K  
D1 1.00000000 sec  
TD0 1  
SFO1 300.1318534 MHz  
NUC1 1H  
P1 8.00 usec  
PLW1 18.00000000 W

F2 - Processing parameters  
SI 65536  
SF 300.1300140 MHz  
WDW EM  
SSB 0  
LB 0.30 Hz  
GB 0  
PC 1.00

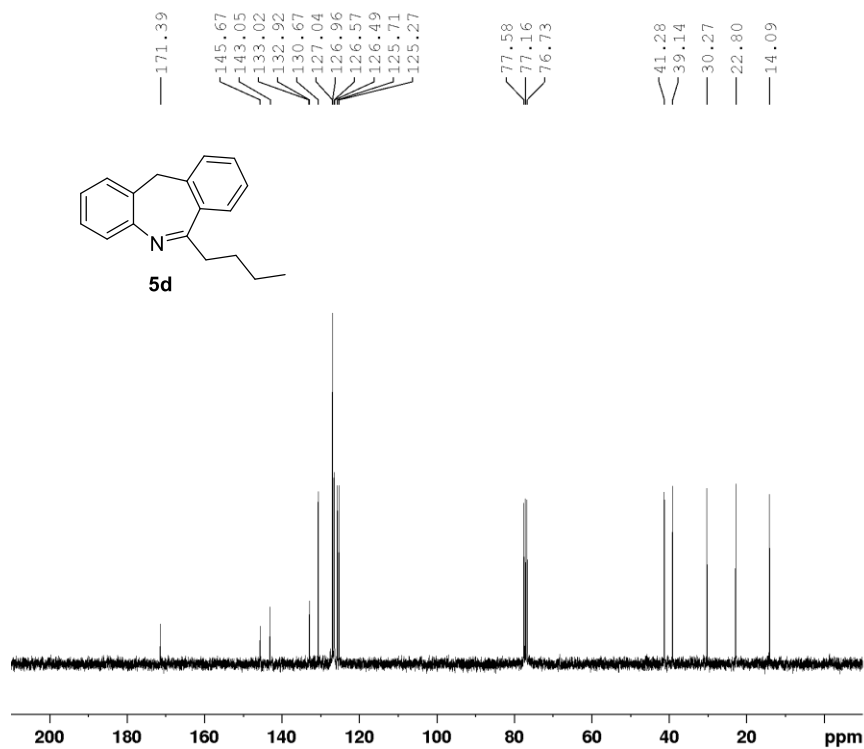

Current Data Parameters  
NAME 500M  
EXPNO 113  
PROCNO 1

F2 - Acquisition Parameters  
Date\_ 20221115  
Time 11.19 h  
INSTRUM spect  
PROBHD 5 mm DUL 13C-1  
PULPROG zgpg30  
TD 65536  
SOLVENT CDC13  
NS 124  
DS 4  
SWH 18028.846 Hz  
FIDRES 0.550197 Hz  
AQ 1.8175317 sec  
RG 209.09  
DW 27.733 usec  
DE 6.50 usec  
TE 0 K  
D1 2.00000000 sec  
d11 0.03000000 sec  
DELTA 1.89999998 sec  
TD0 1  
SFO1 75.4752949 MHz  
NUC1 13C  
P1 11.00 usec  
PLW1 195.00000000 W  
SFO2 300.1312005 MHz  
NUC2 1H  
CPDPRG [2] waltz16  
PCPD2 90.00 usec  
PLN2 14.00000000 W  
PLW12 0.17284000 W  
PLW13 0.14000000 W

F2 - Processing parameters  
SI 32758  
SF 75.4677419 MHz  
WDW EM  
SSB 0  
LB 1.00 Hz  
GB 0  
PC 1.40

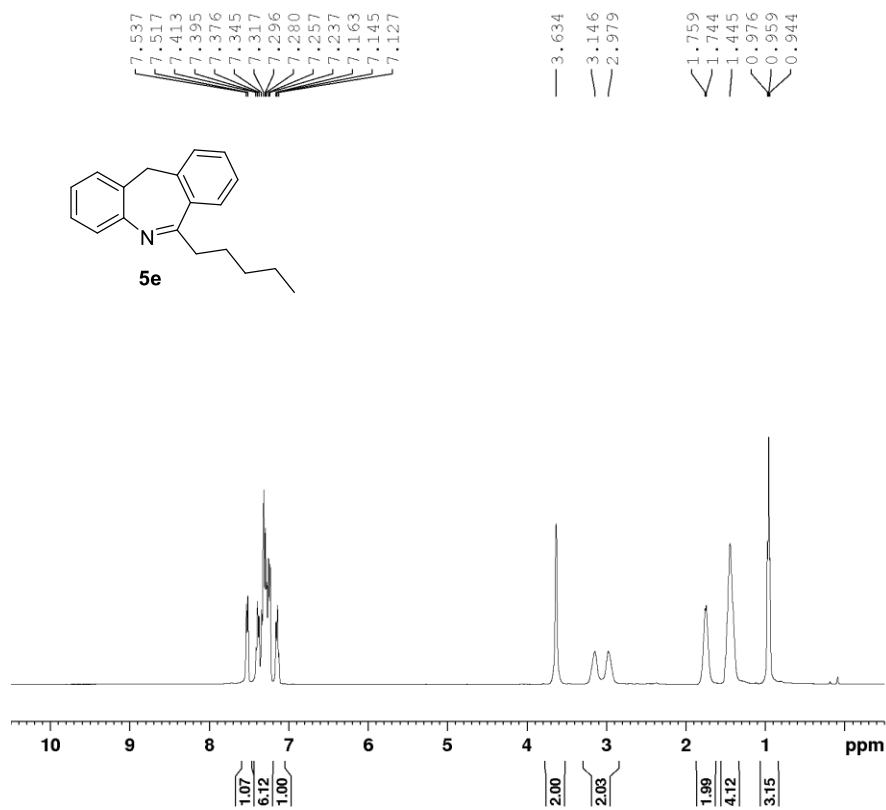

Current Data Parameters  
NAME 500M  
EXPNO 141  
PROCNO 1

F2 - Acquisition Parameters  
Date\_ 20230207  
Time 13.40 h  
INSTRUM spect  
PROBHD 5 mm PABBO BB/  
PULPROG zg30  
TD 32768  
SOLVENT CDCl3  
NS 16  
DS 0  
SWH 8012.820 Hz  
FIDRES 0.489064 Hz  
AQ 2.0447233 sec  
RG 31.63  
DW 62.400 usec  
DE 6.50 usec  
TE 298.0 K  
D1 2.00000000 sec  
TD0 1  
SFO1 400.2424716 MHz  
NUC1 1H  
P1 14.30 usec  
PLW1 12.00000000 W

F2 - Processing parameters  
SI 65536  
SF 400.2400000 MHz  
WDW EM  
SSB 0  
LB 0.30 Hz  
GB 0  
PC 1.00

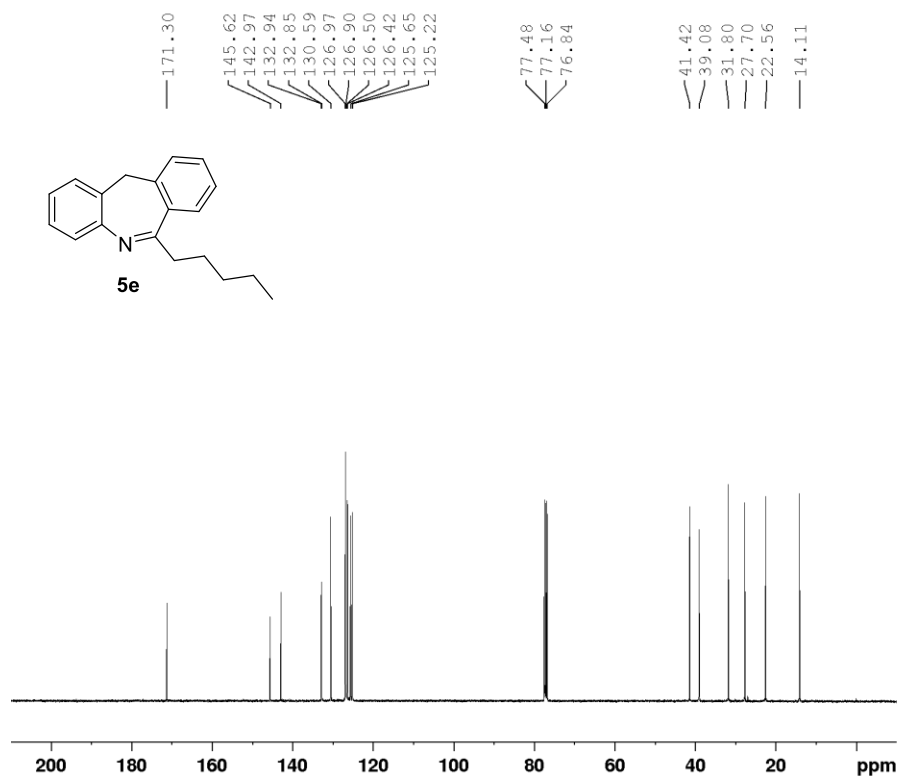

Current Data Parameters  
NAME 500M  
EXPNO 142  
PROCNO 1

F2 - Acquisition Parameters  
Date\_ 20230207  
Time 14.39 h  
INSTRUM spect  
PROBHD 5 mm PABBO BB/  
PULPROG zgpg30  
TD 65536  
SOLVENT CDCl3  
NS 1024  
DS 4  
SWH 24038.461 Hz  
FIDRES 0.733596 Hz  
AQ 1.3631488 sec  
RG 206.33  
DW 20.800 usec  
DE 6.50 usec  
TE 298.0 K  
D1 2.00000000 sec  
d11 0.03000000 sec  
DELTA 1.89999998 sec  
TD0 1  
SFO1 100.6504916 MHz  
NUC1 13C  
P1 10.00 usec  
PLW1 54.00000000 W  
SFO2 400.2416010 MHz  
NUC2 1H  
CPDPRG2 waltz16  
PCPD2 90.00 usec  
PLW2 12.00000000 W  
PLW12 0.30294999 W  
PLW13 0.24539000 W

F2 - Processing parameters  
SI 32768  
SF 100.6404301 MHz  
WDW EM  
SSB 0  
LB 1.00 Hz  
GB 0  
PC 1.40

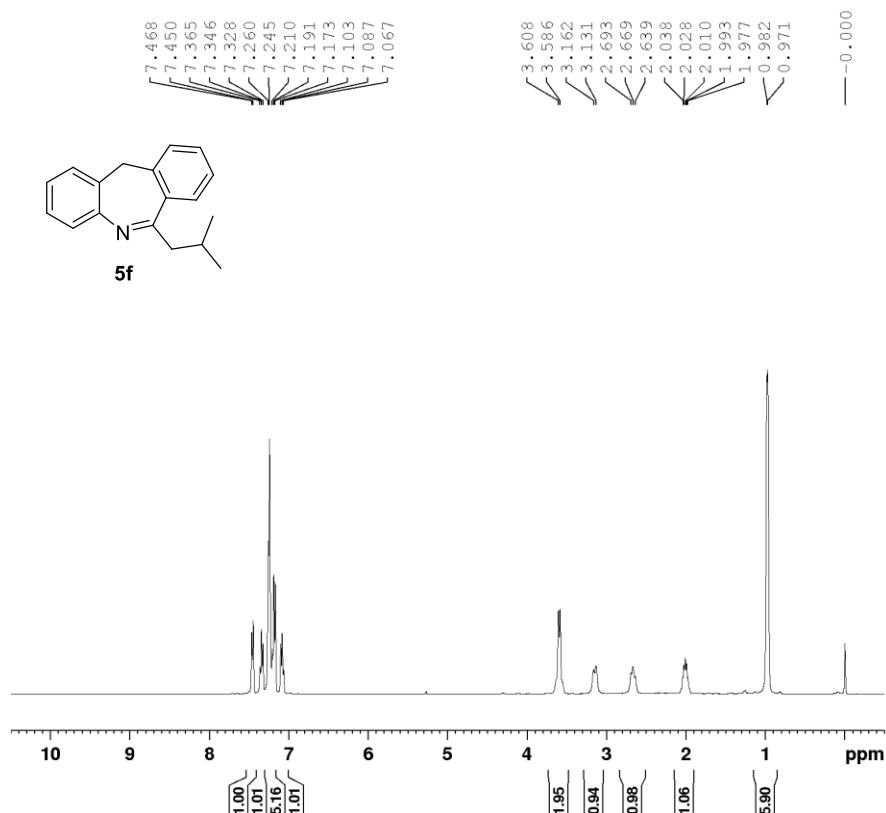

Current Data Parameters  
 NAME 500M  
 EXPNO 145  
 PROCNO 1

F2 - Acquisition Parameters  
 Date\_ 20230217  
 Time 18.48 h  
 INSTRUM spect  
 PROBHD 5 mm PABBO BB/  
 PULPROG zg30  
 TD 32768  
 SOLVENT CDCl3  
 NS 16  
 DS 0  
 SWH 8012.820 Hz  
 FIDRES 0.489064 Hz  
 AQ 2.0447233 sec  
 RG 92.09  
 DW 62.400 usec  
 DE 6.50 usec  
 TE 296.1 K  
 D1 2.00000000 sec  
 TD0 1  
 SFO1 400.2424716 MHz  
 NUC1 1H  
 P1 14.30 usec  
 PLW1 12.00000000 W

F2 - Processing parameters  
 SI 65536  
 SF 400.2400162 MHz  
 WDW EM  
 SSB 0  
 LB 0.30 Hz  
 GB 0  
 PC 1.00

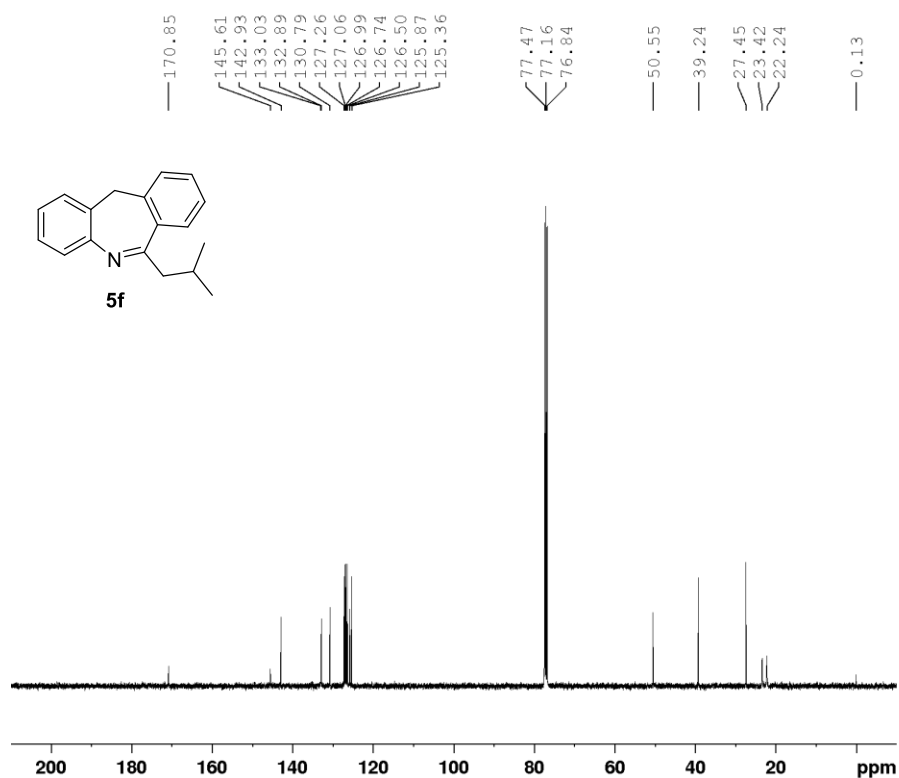

Current Data Parameters  
 NAME 500M  
 EXPNO 146  
 PROCNO 1

F2 - Acquisition Parameters  
 Date\_ 20230217  
 Time 19.47 h  
 INSTRUM spect  
 PROBHD 5 mm PABBO BB/  
 PULPROG zgpg30  
 TD 65536  
 SOLVENT CDCl3  
 NS 1024  
 DS 4  
 SWH 24038.461 Hz  
 FIDRES 0.733596 Hz  
 AQ 1.3631488 sec  
 RG 206.33  
 DW 20.800 usec  
 DE 6.50 usec  
 TE 297.6 K  
 D1 2.00000000 sec  
 d11 0.03000000 sec  
 DELTA 1.89999998 sec  
 TD0 1  
 SFO1 100.6504916 MHz  
 NUC1 13C  
 P1 10.00 usec  
 PLW1 54.00000000 W  
 SFO2 400.2416010 MHz  
 NUC2 1H  
 CPDPRG2 waltz16  
 PCPD2 90.00 usec  
 PLW2 12.00000000 W  
 PLW12 0.30294999 W  
 PLW13 0.24539000 W

F2 - Processing parameters  
 SI 32768  
 SF 100.6404176 MHz  
 WDW EM  
 SSB 0  
 LB 1.00 Hz  
 GB 0  
 PC 1.40

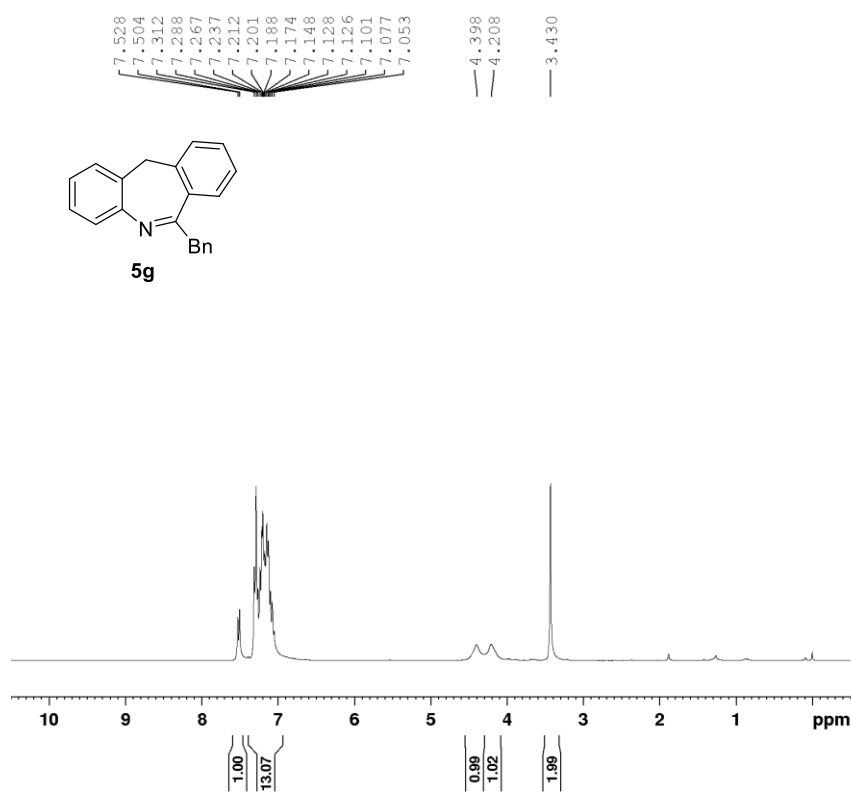

Current Data Parameters  
 NAME 500M  
 EXPNO 114  
 PROCNO 1

F2 - Acquisition Parameters  
 Date\_ 20221028  
 Time 14.04 h  
 INSTRUM spect  
 PROBHD 5 mm DUL 13C-1  
 PULPROG zg30  
 TD 65536  
 SOLVENT CDC13  
 NS 16  
 DS 2  
 SWH 6009.615 Hz  
 FIDRES 0.183399 Hz  
 AQ 5.4525952 sec  
 RG 117.72  
 DW 83.200 usec  
 DE 6.50 usec  
 TE 298.2 K  
 D1 1.00000000 sec  
 TDO 1  
 SFO1 300.1318534 MHz  
 NUC1 1H  
 P1 8.00 usec  
 PLW1 18.00000000 W

F2 - Processing parameters  
 SI 65536  
 SF 300.1300250 MHz  
 WDW EM  
 SSB 0  
 LB 0.30 Hz  
 GB 0  
 FC 1.00

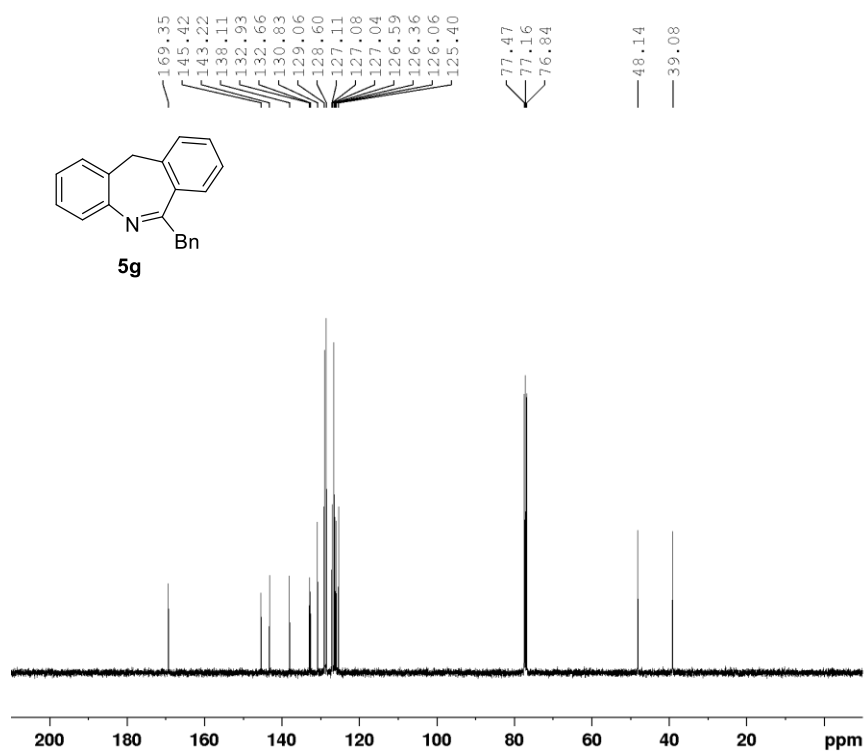

Current Data Parameters  
 NAME 500M  
 EXPNO 117  
 PROCNO 1

F2 - Acquisition Parameters  
 Date\_ 20221028  
 Time 15.25 h  
 INSTRUM spect  
 PROBHD 5 mm PABSO BB/  
 PULPROG zgpg30  
 TD 65536  
 SOLVENT CDC13  
 NS 200  
 DS 4  
 SWH 24038.461 Hz  
 FIDRES 0.733596 Hz  
 AQ 1.3631488 sec  
 RG 206.33  
 DW 20.800 usec  
 DE 6.50 usec  
 TE 299.9 K  
 D1 2.00000000 sec  
 d11 0.03000000 sec  
 DELTA 1.89999998 sec  
 TDO 1  
 SFO1 100.6504916 MHz  
 NUC1 13C  
 P1 10.00 usec  
 PLW1 54.00000000 W  
 SFO2 400.2416010 MHz  
 NUC2 1H  
 CPDPRG2 waltz16  
 PCDD2 90.00 usec  
 PLM2 12.00000000 W  
 PLW2 0.30294999 W  
 PLW13 0.24539000 W

F2 - Processing parameters  
 SI 32768  
 SF 100.6404234 MHz  
 WDW EM  
 SSB 0  
 LB 1.00 Hz  
 GB 0  
 FC 1.40



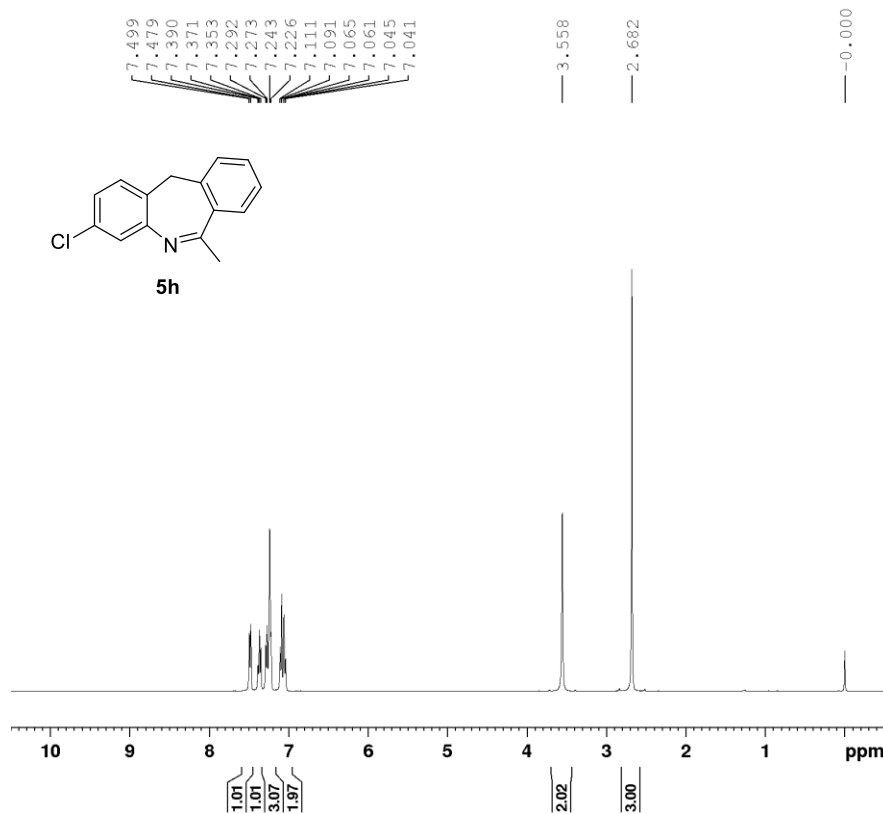

Current Data Parameters  
 NAME 500M  
 EXPNO 157  
 PROCNO 1

F2 - Acquisition Parameters  
 Date\_ 20230222  
 Time 3.36 h  
 INSTRUM spect  
 PROBHD 5 mm PABBO BB/  
 PULPROG zg30  
 TD 32768  
 SOLVENT CDC13  
 NS 16  
 DS 0  
 SWH 8012.820 Hz  
 FIDRES 0.489064 Hz  
 AQ 2.0447233 sec  
 RG 206.33  
 DW 62.400 usec  
 DE 6.50 usec  
 TE 298.0 K  
 D1 2.00000000 sec  
 TD0 1  
 SF01 400.2424716 MHz  
 NUC1 1H  
 P1 14.30 usec  
 PLW1 12.00000000 W

F2 - Processing parameters  
 SI 65536  
 SF 400.2400136 MHz  
 WDW EM  
 SSB 0  
 LB 0.30 Hz  
 GB 0  
 PC 1.00

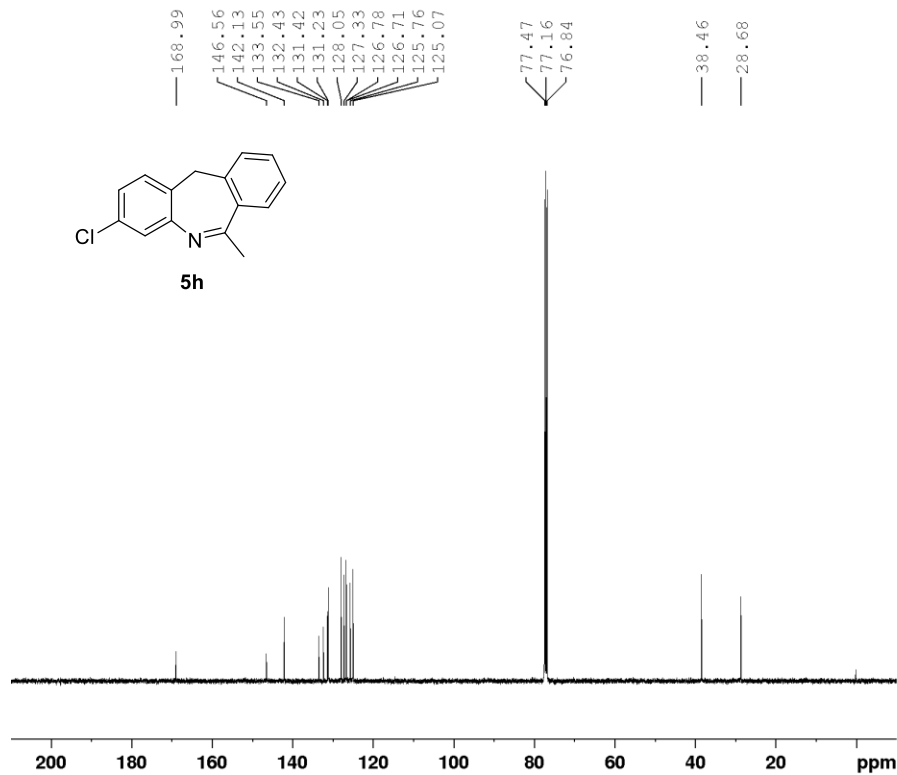

Current Data Parameters  
 NAME 500M  
 EXPNO 158  
 PROCNO 1

F2 - Acquisition Parameters  
 Date\_ 20230222  
 Time 4.35 h  
 INSTRUM spect  
 PROBHD 5 mm PABBO BB/  
 PULPROG zgpg30  
 TD 65536  
 SOLVENT CDC13  
 NS 1024  
 DS 4  
 SWH 24038.461 Hz  
 FIDRES 0.733596 Hz  
 AQ 1.3631488 sec  
 RG 206.33  
 DW 20.800 usec  
 DE 6.50 usec  
 TE 298.5 K  
 D1 2.00000000 sec  
 d11 0.03000000 sec  
 DELTA 1.89999998 sec  
 TD0 1  
 SF01 100.6504916 MHz  
 NUC1 13C  
 P1 10.00 usec  
 PLW1 54.00000000 W  
 SF02 400.2416010 MHz  
 NUC2 1H  
 CPDPRG[2] waltz16  
 ECPD2 90.00 usec  
 PLW2 12.00000000 W  
 PLW12 0.30294999 W  
 PLW13 0.24539000 W

F2 - Processing parameters  
 SI 32768  
 SF 100.6404176 MHz  
 WDW EM  
 SSB 0  
 LB 1.00 Hz  
 GB 0  
 PC 1.40

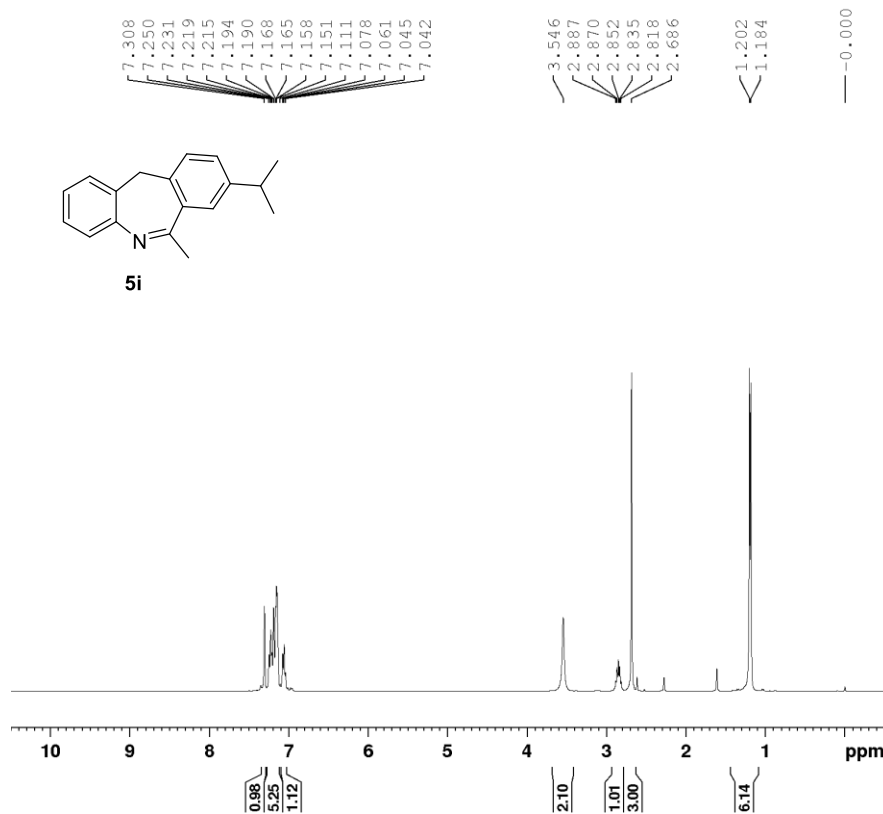

Current Data Parameters  
NAME 500M  
EXPNO 153  
PROCNO 1

F2 - Acquisition Parameters  
Date\_ 20230216  
Time 1.55 h  
INSTRUM spect  
PROBHD 5 mm PABBO BB/  
PULPROG zg30  
TD 32768  
SOLVENT CDC13  
NS 16  
DS 0  
SWH 8012.820 Hz  
FIDRES 0.489064 Hz  
AQ 2.0447233 sec  
RG 34.76  
DW 62.400 usec  
DE 6.50 usec  
TE 298.6 K  
D1 2.00000000 sec  
TD0 1  
SF01 400.2424716 MHz  
NUC1 1H  
P1 14.30 usec  
PLW1 12.00000000 W

F2 - Processing parameters  
SI 65536  
SF 400.2400383 MHz  
WDW EM  
SSB 0  
LB 0.30 Hz  
GB 0  
PC 1.00

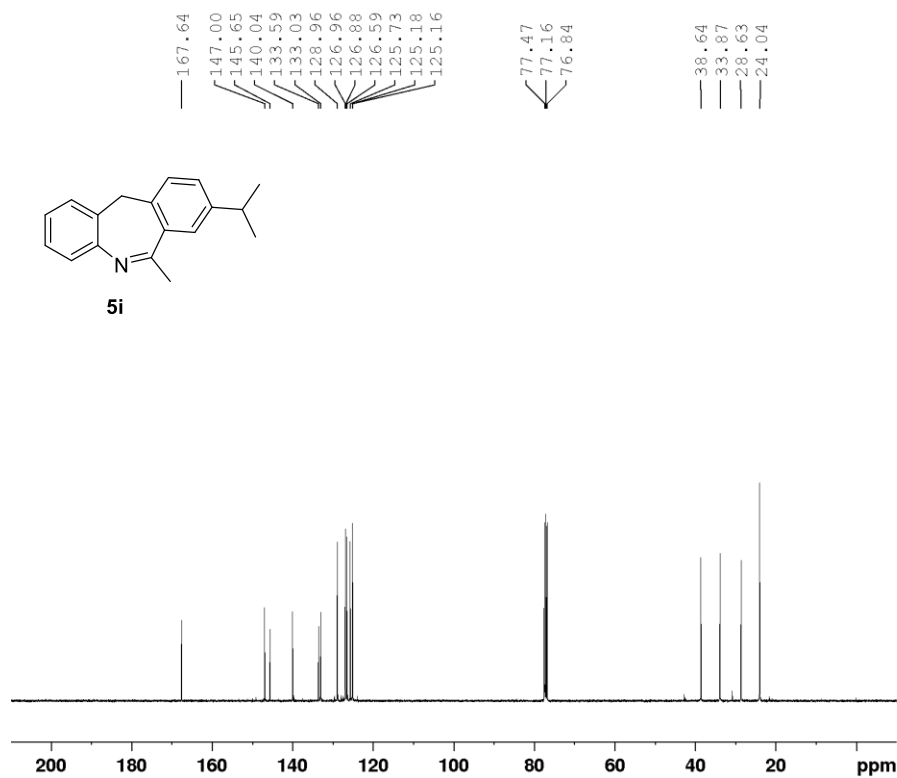

Current Data Parameters  
NAME 500M  
EXPNO 154  
PROCNO 1

F2 - Acquisition Parameters  
Date\_ 20230216  
Time 2.54 h  
INSTRUM spect  
PROBHD 5 mm PABBO BB/  
PULPROG zgpg30  
TD 65536  
SOLVENT CDC13  
NS 1024  
DS 4  
SWH 24038.461 Hz  
FIDRES 0.733596 Hz  
AQ 1.3631488 sec  
RG 206.33  
DW 20.800 usec  
DE 6.50 usec  
TE 299.5 K  
D1 2.00000000 sec  
d11 0.03000000 sec  
DELTA 1.89999998 sec  
TD0 1  
SF01 100.6504916 MHz  
NUC1 13C  
P1 10.00 usec  
PLW1 54.00000000 W  
SF02 400.2416010 MHz  
NUC2 1H  
CPDPRG[2] waltz16  
PCPD2 90.00 usec  
PLW2 12.00000000 W  
PLW12 0.30294999 W  
PLW13 0.24539000 W

F2 - Processing parameters  
SI 32768  
SF 100.6404308 MHz  
WDW EM  
SSB 0  
LB 1.00 Hz  
GB 0  
PC 1.40

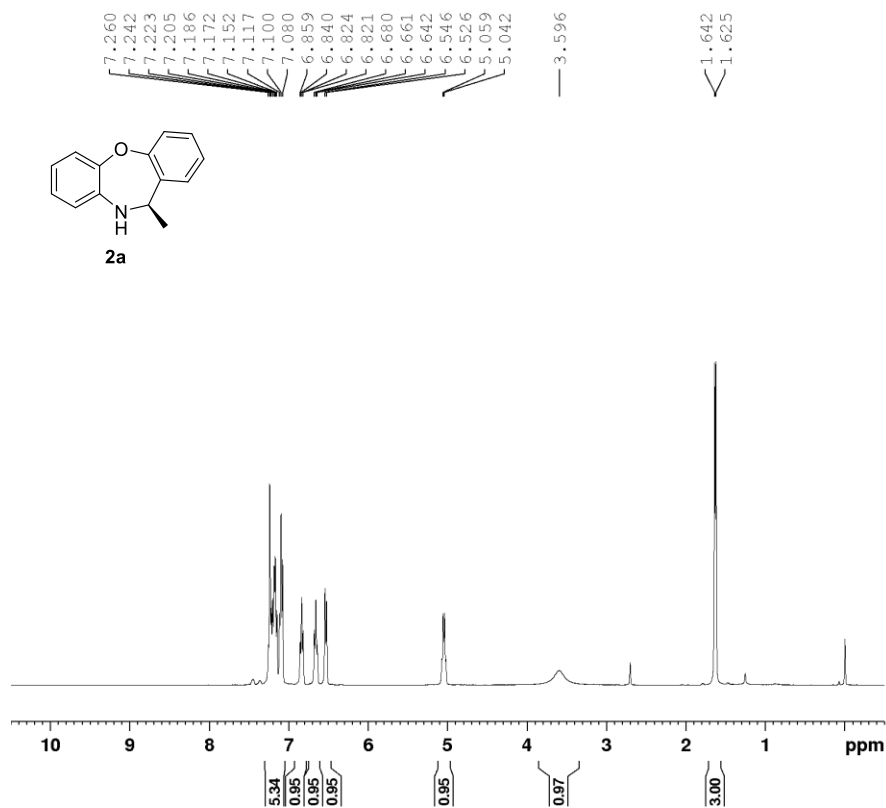

Current Data Parameters  
 NAME 500M  
 EXPNO 31  
 PROCNO 1

F2 - Acquisition Parameters  
 Date\_ 20230202  
 Time 10.14 h  
 INSTRUM spect  
 PROBHD 5 mm PABBO BB/  
 PULPROG zgpg30  
 TD 32768  
 SOLVENT CDCl3  
 NS 16  
 DS 0  
 SWH 8012.820 Hz  
 FIDRES 0.489064 Hz  
 AQ 2.0447233 sec  
 RG 102.73  
 DW 62.400 usec  
 DE 6.50 usec  
 TE 298.0 K  
 D1 2.00000000 sec  
 TD0 1  
 SFO1 400.2424716 MHz  
 NUC1 1H  
 P1 14.30 usec  
 PLW1 12.00000000 W

F2 - Processing parameters  
 SI 65536  
 SF 400.2400174 MHz  
 WDW EM  
 SSB 0  
 LB 0.30 Hz  
 GB 0  
 PC 1.00

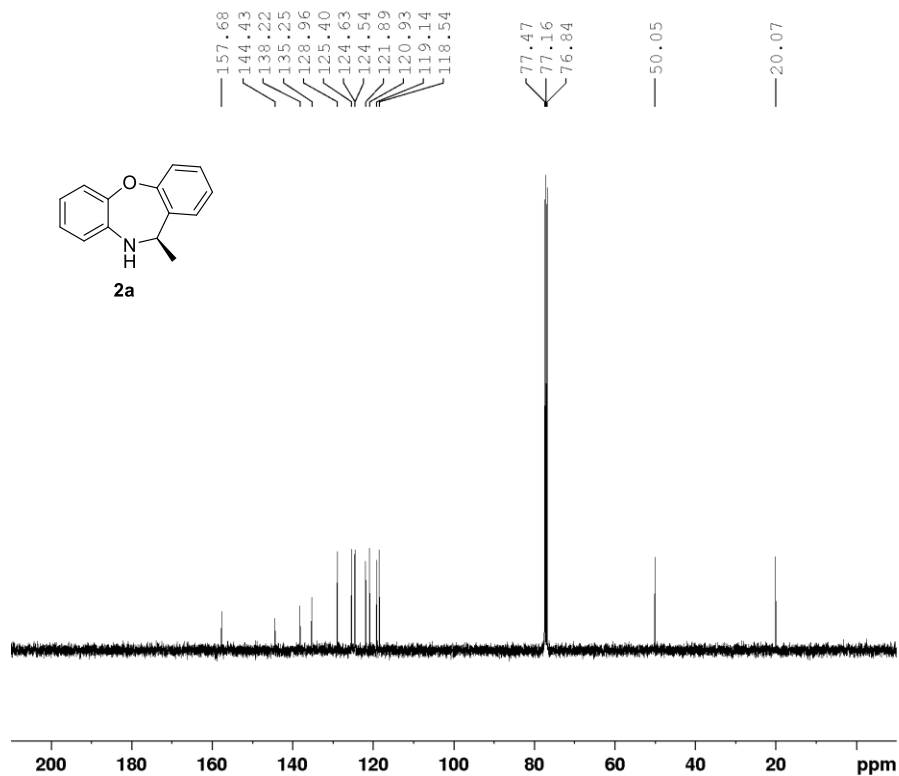

Current Data Parameters  
 NAME 500M  
 EXPNO 32  
 PROCNO 1

F2 - Acquisition Parameters  
 Date\_ 20230202  
 Time 10.15 h  
 INSTRUM spect  
 PROBHD 5 mm PABBO BB/  
 PULPROG zgpg30  
 TD 65536  
 SOLVENT CDCl3  
 NS 155  
 DS 4  
 SWH 24038.461 Hz  
 FIDRES 0.733596 Hz  
 AQ 1.3631488 sec  
 RG 206.33  
 DW 20.800 usec  
 DE 6.50 usec  
 TE 298.0 K  
 D1 2.00000000 sec  
 d11 0.03000000 sec  
 DELTA 1.899999998 sec  
 TD0 1  
 SFO1 100.6504916 MHz  
 NUC1 13C  
 P1 10.00 usec  
 PLW1 54.00000000 W  
 SFO2 400.2416010 MHz  
 NUC2 1H  
 CPDPRG2 waltz16  
 ECPD2 90.00 usec  
 PLW2 12.00000000 W  
 PLW12 0.30294999 W  
 PLW13 0.24539000 W

F2 - Processing parameters  
 SI 32768  
 SF 100.6404168 MHz  
 WDW EM  
 SSB 0  
 LB 1.00 Hz  
 GB 0  
 PC 1.40

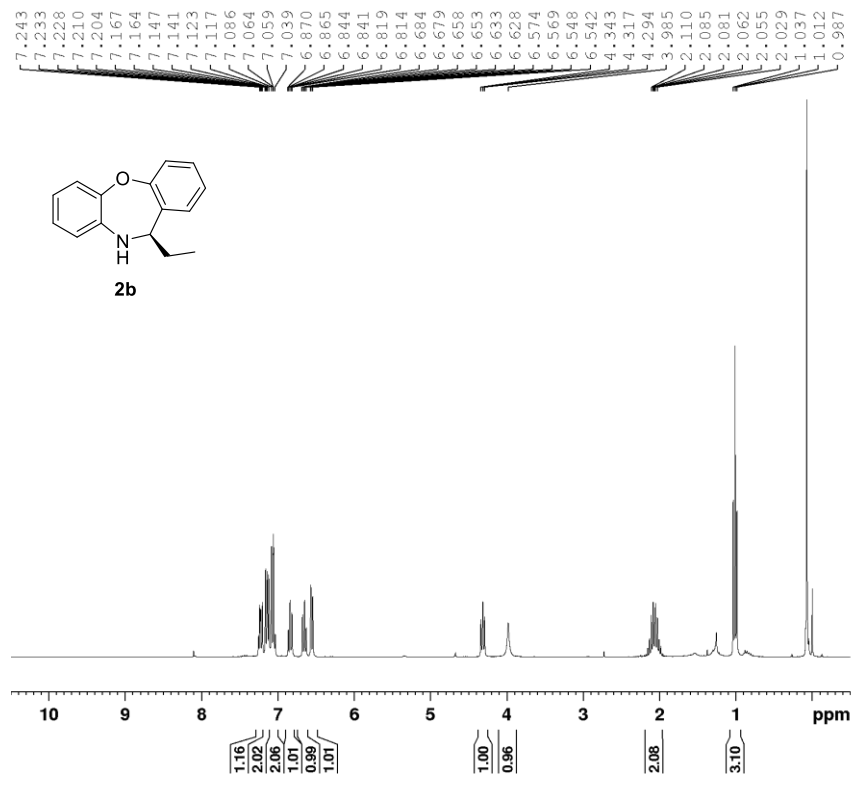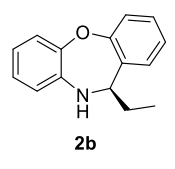

Current Data Parameters  
 NAME 500M  
 EXPNO 33  
 PROCNO 1

F2 - Acquisition Parameters  
 Date\_ 20211118  
 Time 0.50 h  
 INSTRUM spect  
 PROBHD 5 mm DUL 13C-1  
 PULPROG zg30  
 TD 65536  
 SOLVENT CDC13  
 NS 16  
 DS 2  
 SWH 6009.615 Hz  
 FIDRES 0.183399 Hz  
 AQ 5.4525952 sec  
 RG 209.09  
 DW 83.200 usec  
 DE 6.50 usec  
 TE 298.7 K  
 D1 1.00000000 sec  
 TD0 1  
 SFO1 300.1318534 MHz  
 NUC1 1H  
 P1 8.00 usec  
 PLW1 18.00000000 W

F2 - Processing parameters  
 SI 65536  
 SF 300.1300125 MHz  
 WDW EM  
 SSB 0  
 LB 0.30 Hz  
 GB 0  
 FC 1.00

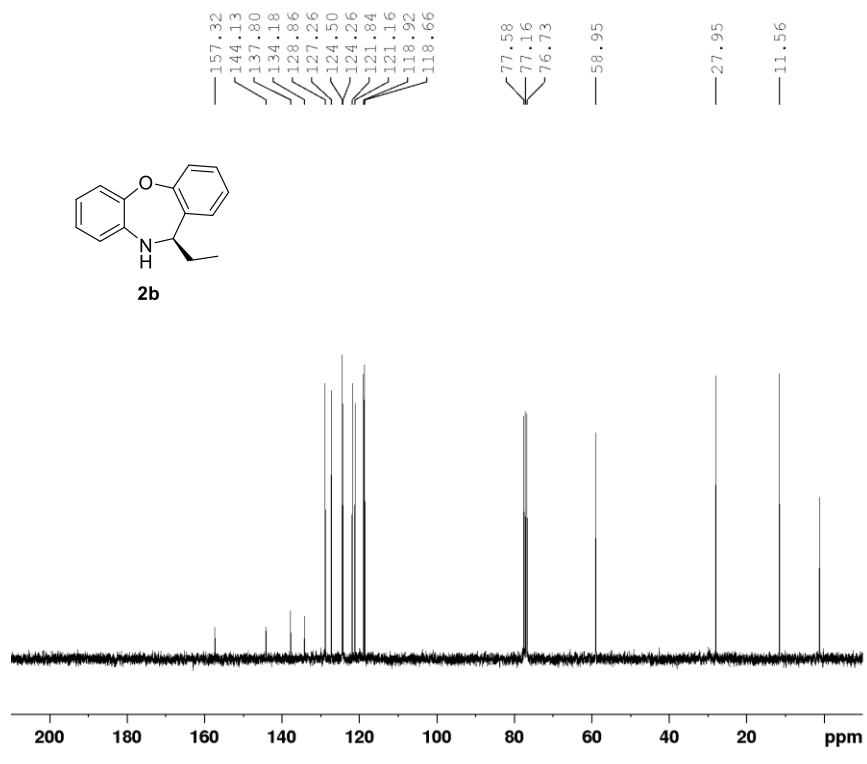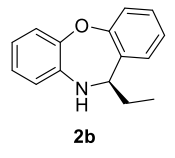

Current Data Parameters  
 NAME 500M  
 EXPNO 34  
 PROCNO 1

F2 - Acquisition Parameters  
 Date\_ 20211118  
 Time 1.13 h  
 INSTRUM spect  
 PROBHD 5 mm DUL 13C-1  
 PULPROG zgpg30  
 TD 65536  
 SOLVENT CDC13  
 NS 256  
 DS 4  
 SWH 18028.846 Hz  
 FIDRES 0.550197 Hz  
 AQ 1.8175317 sec  
 RG 209.09  
 DW 27.733 usec  
 DE 6.50 usec  
 TE 299.3 K  
 D1 2.00000000 sec  
 d11 0.03000000 sec  
 DELTA 1.89999998 sec  
 TD0 1  
 SFO1 75.4752949 MHz  
 NUC1 13C  
 P1 11.00 usec  
 PLW1 195.00000000 W  
 SFO2 300.1312005 MHz  
 NUC2 1H  
 CPDPRG [2] waltz16  
 PCDD2 90.00 usec  
 PLM2 14.00000000 W  
 PLW12 0.17284000 W  
 PLW13 0.14000000 W

F2 - Processing parameters  
 SI 32768  
 SF 75.4677396 MHz  
 WDW EM  
 SSB 0  
 LB 1.00 Hz  
 GB 0  
 FC 1.40

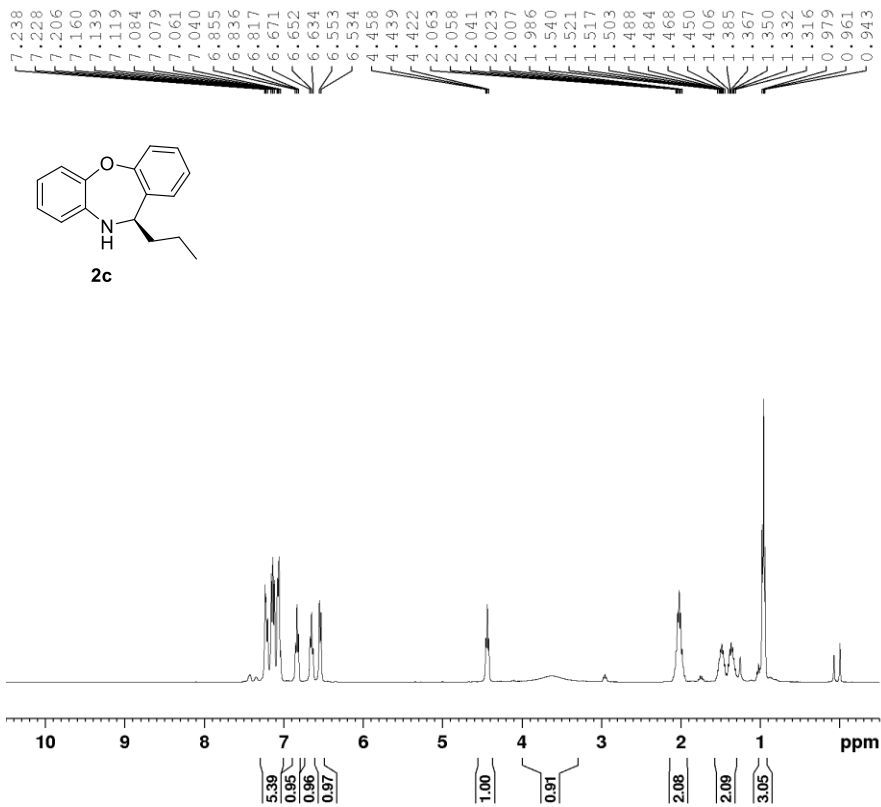

Current Data Parameters  
 NAME 500M  
 EXPNO 35  
 PROCNO 1

F2 - Acquisition Parameters  
 Date\_ 20230202  
 Time 10.27 h  
 INSTRUM spect  
 PROBHD 5 mm PABBO BB/  
 FULPROG zg30  
 TD 32768  
 SOLVENT CDCl3  
 NS 16  
 DS 0  
 SWH 8012.820 Hz  
 FIDRES 0.489064 Hz  
 AQ 2.0447233 sec  
 RG 80.72  
 DW 62.400 usec  
 DE 6.50 usec  
 TE 298.0 K  
 D1 2.00000000 sec  
 TD0 1  
 SFO1 400.2424716 MHz  
 NUC1 1H  
 P1 14.30 usec  
 PLW1 12.00000000 W

F2 - Processing parameters  
 SI 65536  
 SF 400.2400191 MHz  
 WDW EM  
 SSB 0  
 LB 0.30 Hz  
 GB 0  
 PC 1.00

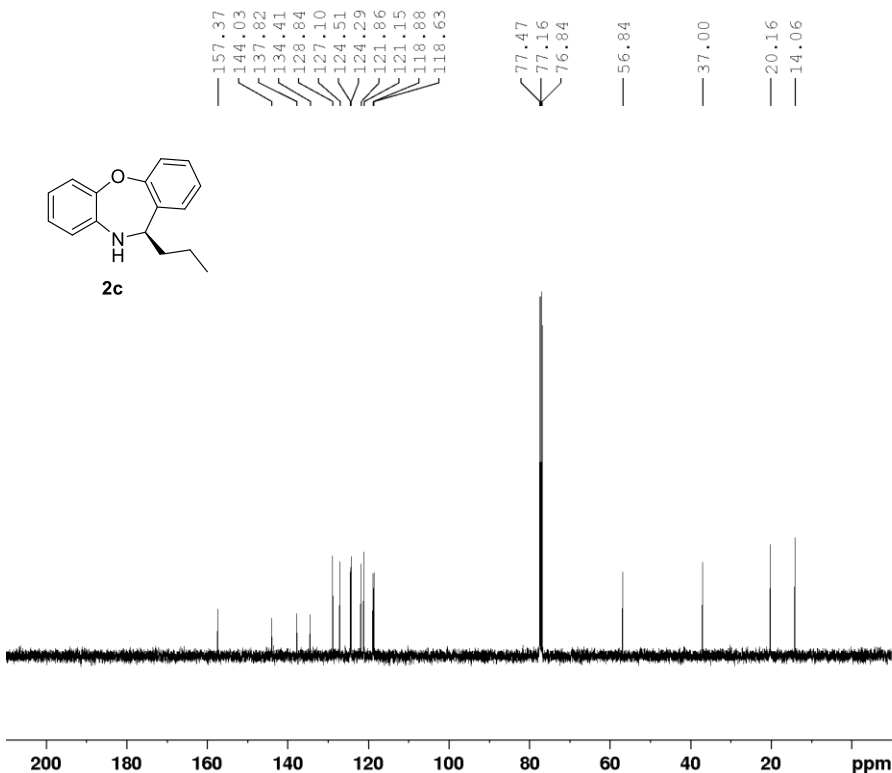

Current Data Parameters  
 NAME 500M  
 EXPNO 36  
 PROCNO 1

F2 - Acquisition Parameters  
 Date\_ 20230202  
 Time 10.30 h  
 INSTRUM spect  
 PROBHD 5 mm PABBO BB/  
 FULPROG zgpg30  
 TD 65536  
 SOLVENT CDCl3  
 NS 105  
 DS 4  
 SWH 24038.461 Hz  
 FIDRES 0.733596 Hz  
 AQ 1.3631488 sec  
 RG 206.33  
 DW 20.800 usec  
 DE 6.50 usec  
 TE 298.0 K  
 D1 2.00000000 sec  
 d11 0.03000000 sec  
 DELTA 1.89999998 sec  
 TD0 1  
 SFO1 100.6504916 MHz  
 NUC1 13C  
 P1 10.00 usec  
 PLW1 54.00000000 W  
 SFO2 400.2416010 MHz  
 NUC2 1H  
 CPDPRG2 waltz16  
 PCPD2 30.00 usec  
 PLW2 12.00000000 W  
 PLW12 0.30294999 W  
 PLW13 0.24539000 W

F2 - Processing parameters  
 SI 32768  
 SF 100.6404172 MHz  
 WDW EM  
 SSB 0  
 LB 1.00 Hz  
 GB 0  
 PC 1.40

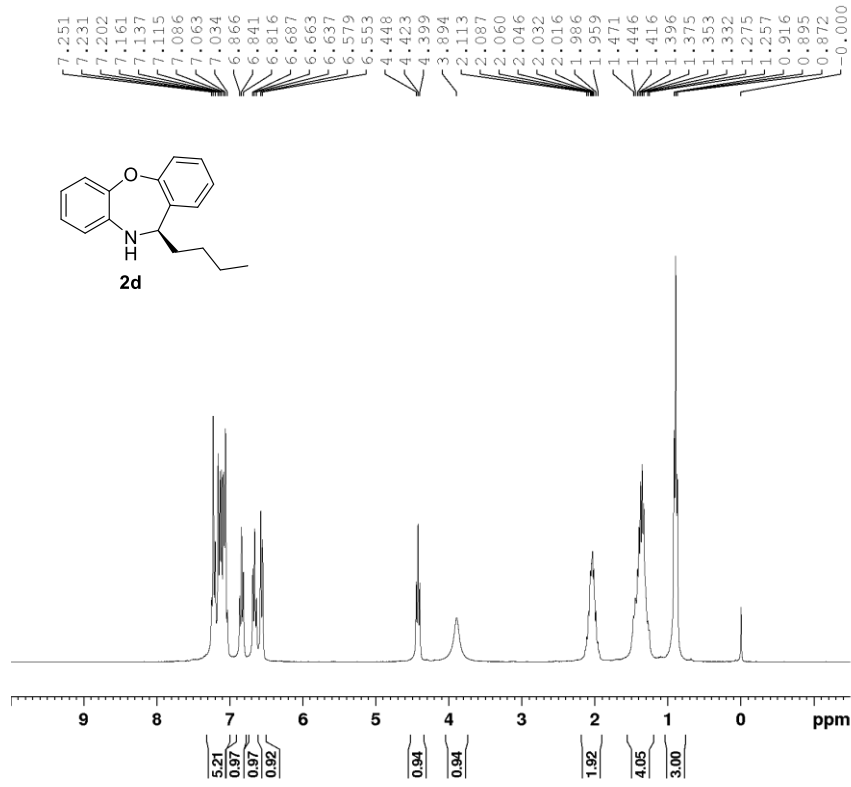

Current Data Parameters  
 NAME 500M  
 EXPNO 37  
 PROCNO 1

F2 - Acquisition Parameters  
 Date\_ 20220123  
 Time 1.44 h  
 INSTRUM spect  
 PROBHD 5 mm DUL 13C-1  
 PULPROG zg30  
 TD 65536  
 SOLVENT CDCl3  
 NS 16  
 DS 2  
 SWH 6009.615 Hz  
 FIDRES 0.183399 Hz  
 AQ 5.4525952 sec  
 RG 142.81  
 DW 83.200 usec  
 DE 6.50 usec  
 TE 296.4 K  
 D1 1.00000000 sec  
 TDO 1  
 SFO1 300.1318534 MHz  
 NUC1 1H  
 P1 8.00 usec  
 PLW1 18.00000000 W

F2 - Processing parameters  
 SI 65536  
 SF 300.1300162 MHz  
 WDW EM  
 SSB 0  
 LB 0.30 Hz  
 GB 0  
 PC 1.00

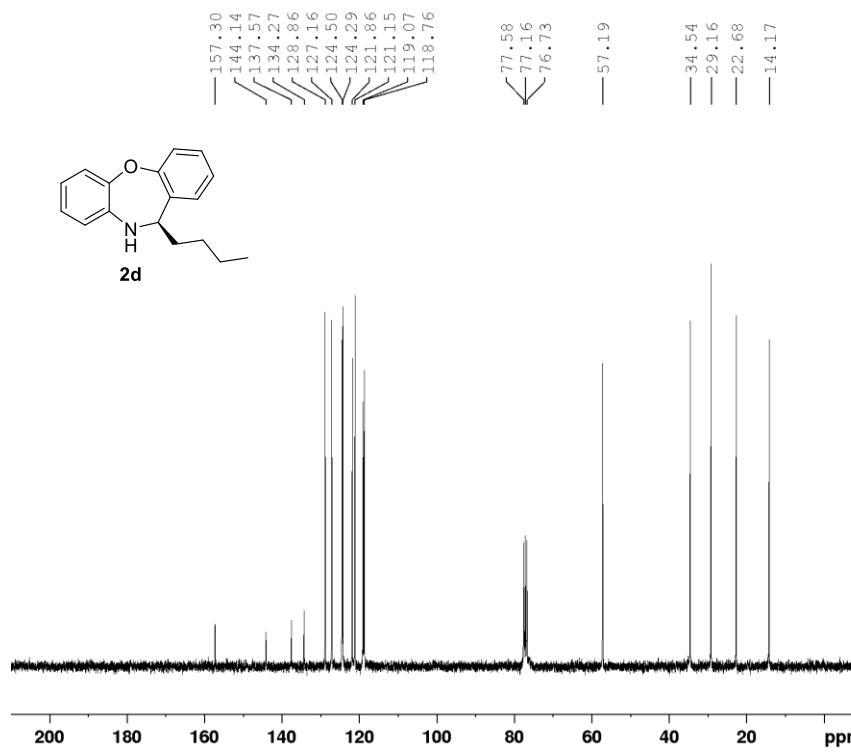

Current Data Parameters  
 NAME 500M  
 EXPNO 38  
 PROCNO 1

F2 - Acquisition Parameters  
 Date\_ 20220123  
 Time 1.53 h  
 INSTRUM spect  
 PROBHD 5 mm DUL 13C-1  
 PULPROG zgpg30  
 TD 65536  
 SOLVENT CDCl3  
 NS 435  
 DS 4  
 SWH 18028.846 Hz  
 FIDRES 0.550197 Hz  
 AQ 1.8175317 sec  
 RG 209.09  
 DW 27.733 usec  
 DE 6.50 usec  
 TE 296.7 K  
 D1 2.00000000 sec  
 d11 0.03000000 sec  
 DELTA 1.89999998 sec  
 TDO 1  
 SFO1 75.4752949 MHz  
 NUC1 13C  
 P1 11.00 usec  
 PLW1 195.00000000 W  
 SFO2 300.1312005 MHz  
 NUC2 1H  
 CPDPRG [2] waltz16  
 FCB2 90.00 usec  
 PLM2 14.00000000 W  
 PLW2 0.17284000 W  
 PLW3 0.14000000 W

F2 - Processing parameters  
 SI 32768  
 SF 75.4677415 MHz  
 WDW EM  
 SSB 0  
 LB 1.00 Hz  
 GB 0  
 PC 1.40

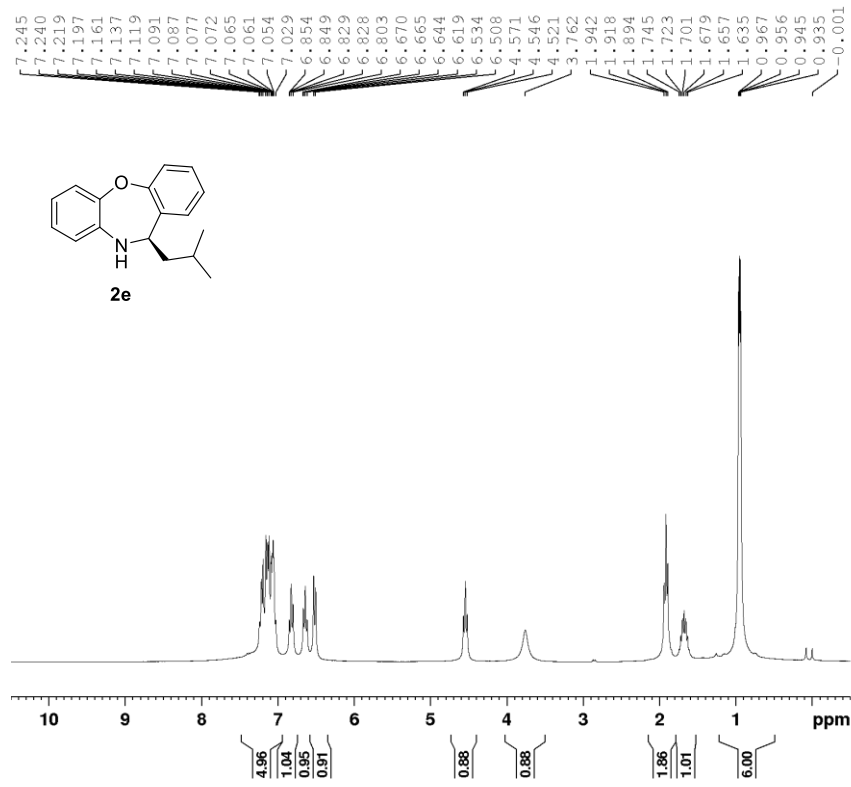

Current Data Parameters  
 NAME 500M  
 EXPNO 246  
 PROCNO 1

F2 - Acquisition Parameters  
 Date\_ 20220114  
 Time 22.31 h  
 INSTRUM spect  
 PROBHD 5 mm DUL 13C-1  
 PULPROG zg30  
 TD 65536  
 SOLVENT CDCl3  
 NS 16  
 DS 2  
 SWH 6009.615 Hz  
 FIDRES 0.183399 Hz  
 AQ 5.4525952 sec  
 RG 82.09  
 DW 83.200 usec  
 DE 6.50 usec  
 TE 296.7 K  
 D1 1.00000000 sec  
 TDD 1  
 SFO1 300.1318534 MHz  
 NUC1 1H  
 P1 8.00 usec  
 PLW1 18.00000000 W

F2 - Processing parameters  
 SI 65536  
 SF 300.1300260 MHz  
 WDW EM  
 SSB 0  
 LB 0.30 Hz  
 GB 0  
 PC 1.00

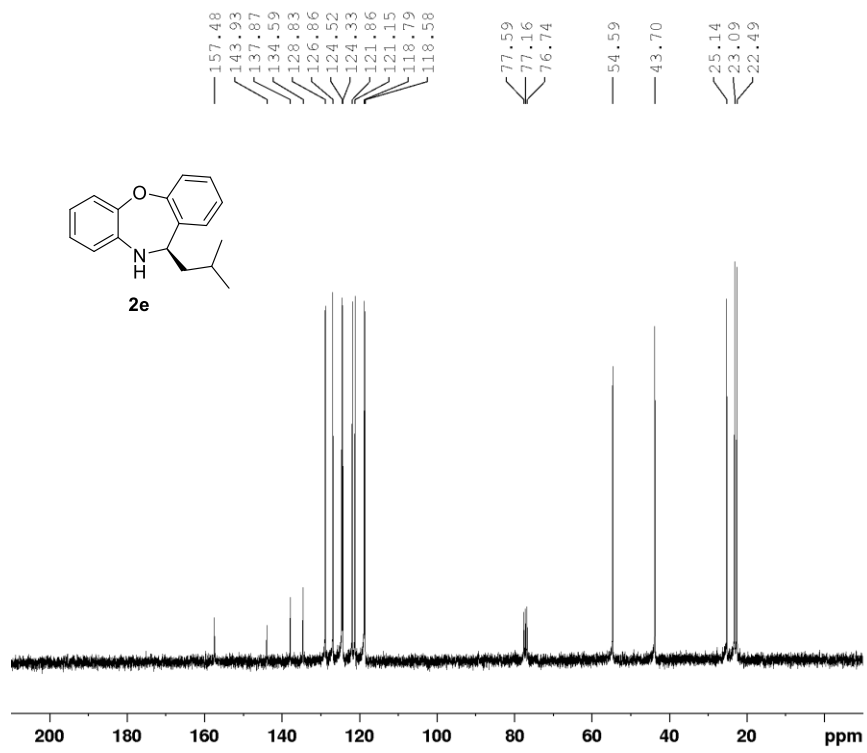

Current Data Parameters  
 NAME 500M  
 EXPNO 248  
 PROCNO 1

F2 - Acquisition Parameters  
 Date\_ 20220114  
 Time 23.40 h  
 INSTRUM spect  
 PROBHD 5 mm DUL 13C-1  
 PULPROG zgpg30  
 TD 65536  
 SOLVENT CDCl3  
 NS 114  
 DS 4  
 SWH 18028.846 Hz  
 FIDRES 0.550197 Hz  
 AQ 1.8175317 sec  
 RG 209.09  
 DW 27.733 usec  
 DE 6.50 usec  
 TE 297.1 K  
 D1 2.00000000 sec  
 d11 0.03000000 sec  
 DELTA 1.899999998 sec  
 TDD 1  
 SFO1 75.4752949 MHz  
 NUC1 13C  
 P1 11.00 usec  
 PLW1 195.00000000 W  
 SFO2 300.1312005 MHz  
 NUC2 1H  
 CPDPRG [2] waltz16  
 PCED2 90.00 usec  
 PLM2 14.00000000 W  
 PLW12 0.17284000 W  
 PLW13 0.14000000 W

F2 - Processing parameters  
 SI 32768  
 SF 75.4677483 MHz  
 WDW EM  
 SSB 0  
 LB 1.00 Hz  
 GB 0  
 PC 1.40

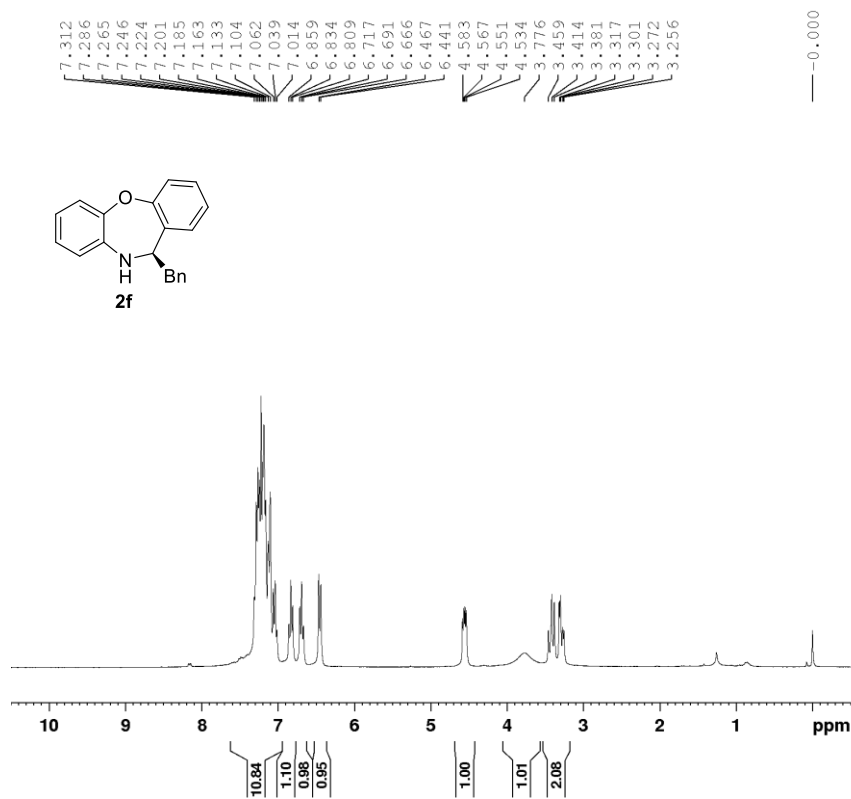

Current Data Parameters  
 NAME 500M  
 EXPNO 41  
 PROCNO 1

F2 - Acquisition Parameters  
 Date\_ 20220114  
 Time 18.31 h  
 INSTRUM spect  
 PROBHD 5 mm DUL 13C-1  
 PULPROG zg30  
 TD 65536  
 SOLVENT CDC13  
 NS 16  
 DS 2  
 SWH 6009.615 Hz  
 FIDRES 0.183399 Hz  
 AQ 5.4525952 sec  
 RG 166.41  
 DW 83.200 usec  
 DE 6.50 usec  
 TE 296.5 K  
 D1 1.00000000 sec  
 TD0 1  
 SFO1 300.1318534 MHz  
 NUC1 1H  
 P1 8.00 usec  
 PLW1 18.00000000 W

F2 - Processing parameters  
 SI 65536  
 SF 300.1300188 MHz  
 WDW EM  
 SSB 0  
 LB 0.30 Hz  
 GB 0  
 FC 1.00

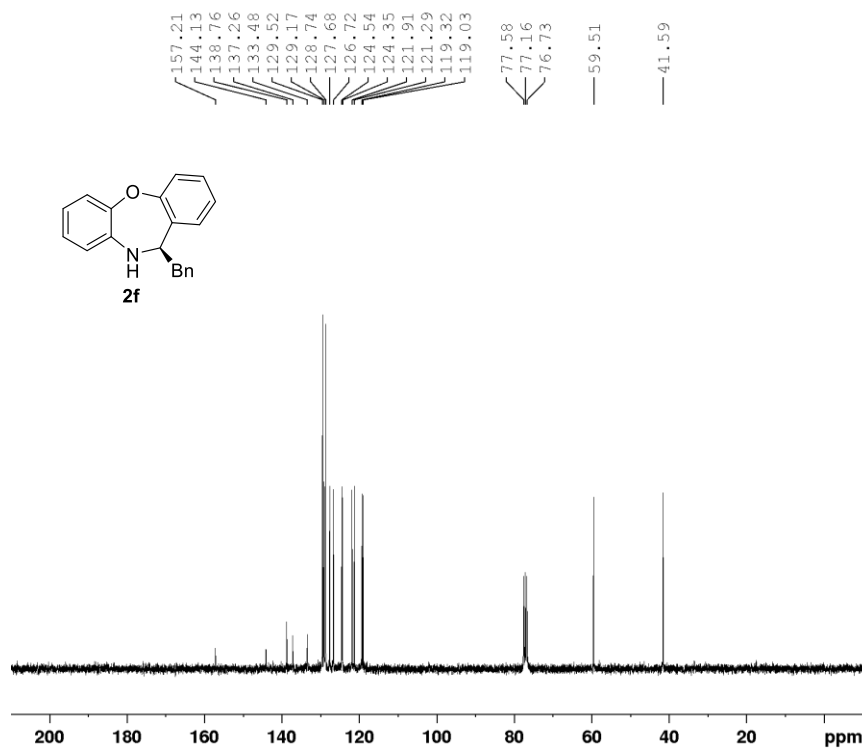

Current Data Parameters  
 NAME 500M  
 EXPNO 42  
 PROCNO 1

F2 - Acquisition Parameters  
 Date\_ 20220114  
 Time 18.46 h  
 INSTRUM spect  
 PROBHD 5 mm DUL 13C-1  
 PULPROG zgpg30  
 TD 65536  
 SOLVENT CDC13  
 NS 200  
 DS 4  
 SWH 18028.846 Hz  
 FIDRES 0.550197 Hz  
 AQ 1.8175317 sec  
 RG 209.09  
 DW 27.733 usec  
 DE 6.50 usec  
 TE 296.5 K  
 D1 2.00000000 sec  
 d11 0.03000000 sec  
 DELTA 1.89999998 sec  
 TD0 1  
 SFO1 75.4752949 MHz  
 NUC1 13C  
 P1 11.00 usec  
 PLW1 195.00000000 W  
 SFO2 300.1312005 MHz  
 NUC2 1H  
 CPDPRG2 waltz16  
 PCDD2 90.00 usec  
 PLN2 14.00000000 W  
 PLW2 0.17284000 W  
 PLW3 0.14000000 W

F2 - Processing parameters  
 SI 32768  
 SF 75.4677424 MHz  
 WDW EM  
 SSB 0  
 LB 1.00 Hz  
 GB 0  
 FC 1.40



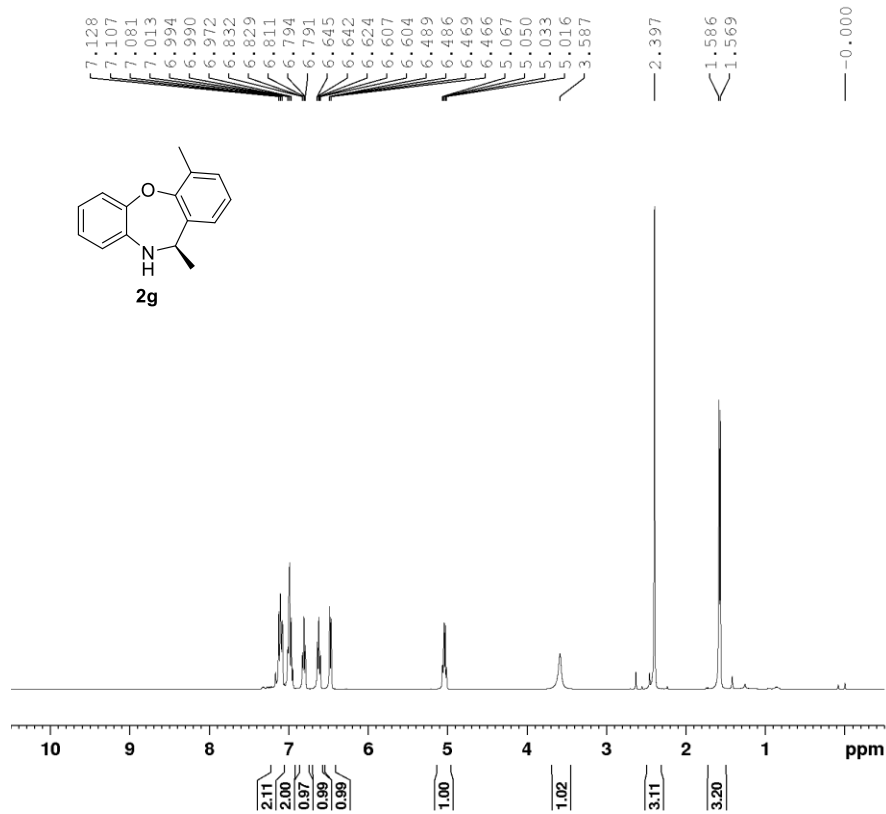

Current Data Parameters  
 NAME 500M  
 EXPNO 43  
 PROCNO 1

F2 - Acquisition Parameters  
 Date\_ 20230205  
 Time 16.43 h  
 INSTRUM spect  
 PROBHD 5 mm PABBO BB/  
 PULPROG zg30  
 TD 32768  
 SOLVENT CDCl3  
 NS 16  
 DS 0  
 SWH 8012.820 Hz  
 FIDRES 0.489064 Hz  
 AQ 2.0447233 sec  
 RG 43.5  
 DW 62.400 usec  
 DE 6.50 usec  
 TE 298.4 K  
 D1 2.00000000 sec  
 TDO 1  
 SFO1 400.2424716 MHz  
 NUC1 1H  
 P1 14.30 usec  
 PLW1 12.00000000 W

F2 - Processing parameters  
 SI 65536  
 SF 400.2400457 MHz  
 WDW EM  
 SSB 0  
 LB 0.30 Hz  
 GB 0  
 PC 1.00

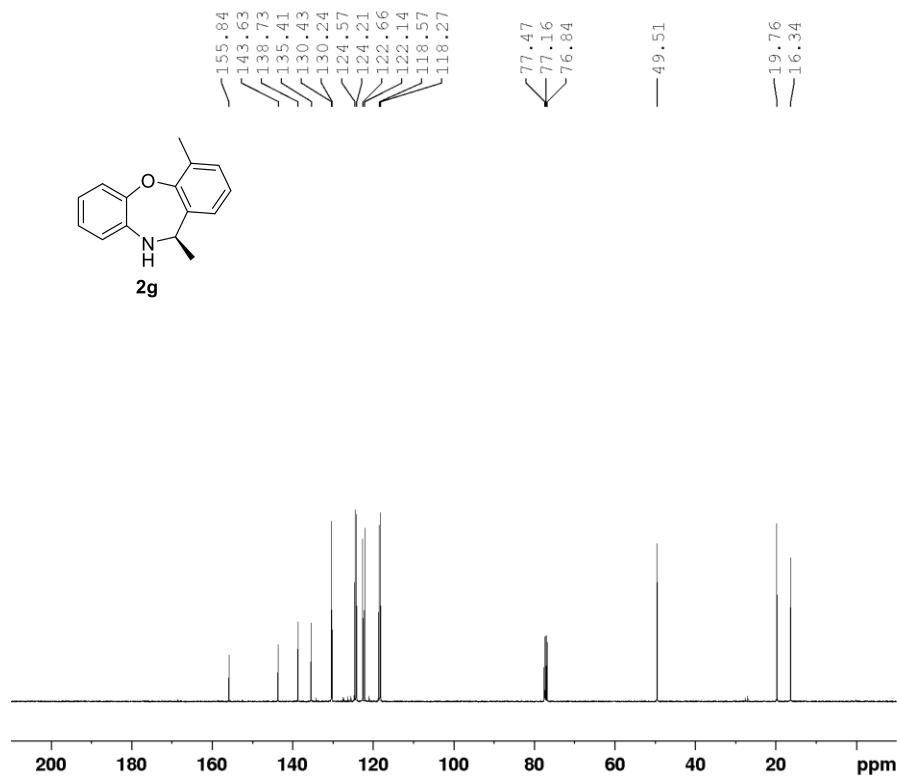

Current Data Parameters  
 NAME 500M  
 EXPNO 44  
 PROCNO 1

F2 - Acquisition Parameters  
 Date\_ 20230205  
 Time 17.42 h  
 INSTRUM spect  
 PROBHD 5 mm PABBO BB/  
 PULPROG zgpg30  
 TD 65536  
 SOLVENT CDCl3  
 NS 1024  
 DS 4  
 SWH 24038.461 Hz  
 FIDRES 0.733596 Hz  
 AQ 1.3631488 sec  
 RG 206.33  
 DW 20.800 usec  
 DE 6.50 usec  
 TE 298.7 K  
 D1 2.00000000 sec  
 d11 0.03000000 sec  
 DELTA 1.89999998 sec  
 TDO 1  
 SFO1 100.6504916 MHz  
 NUC1 13C  
 P1 10.00 usec  
 PLW1 54.00000000 W  
 SFO2 400.2416010 MHz  
 NUC2 1H  
 CPDPRG2 waltz16  
 ECPD2 90.00 usec  
 PLW2 12.00000000 W  
 PLW12 0.30294999 W  
 PLW13 0.24539000 W

F2 - Processing parameters  
 SI 32768  
 SF 100.6404275 MHz  
 WDW EM  
 SSB 0  
 LB 1.00 Hz  
 GB 0  
 PC 1.40

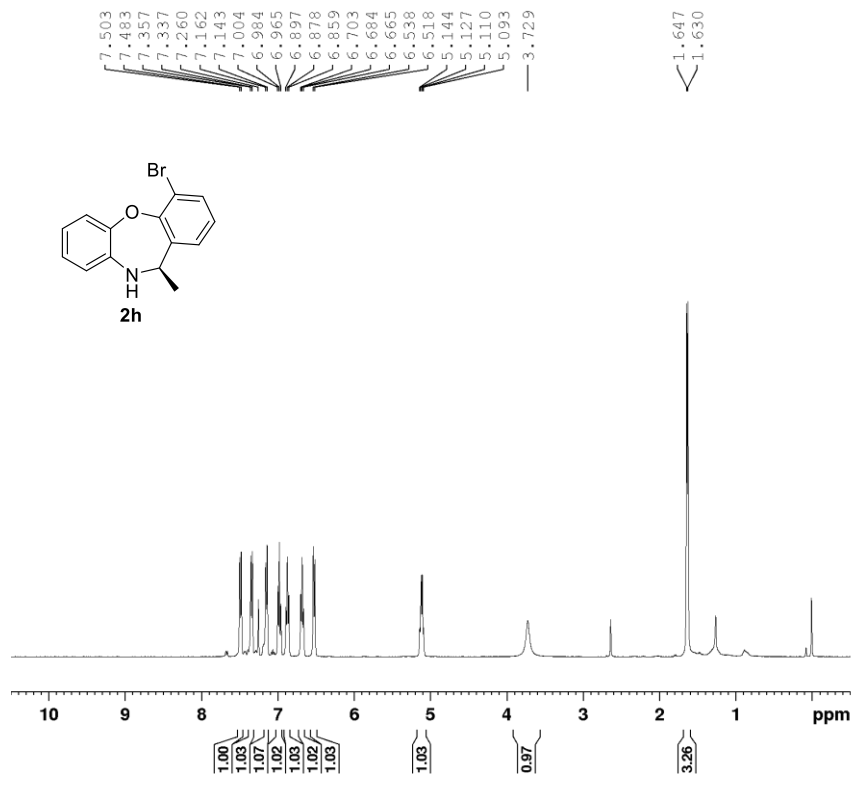

Current Data Parameters  
 NAME 500M  
 EXPNO 45  
 PROCNO 1

F2 - Acquisition Parameters  
 Date\_ 20221115  
 Time 20.58 h  
 INSTRUM spect  
 PROBHD 5 mm PABBO BB/  
 PULPROG zg30  
 TD 32768  
 SOLVENT CDC13  
 NS 16  
 DS 0  
 SWH 8012.820 Hz  
 FIDRES 0.489064 Hz  
 AQ 2.0447233 sec  
 RG 206.33  
 DW 62.400 usec  
 DE 6.50 usec  
 TE 298.0 K  
 D1 2.0000000 sec  
 TD0 1  
 SFO1 400.2424716 MHz  
 NUC1 1H  
 P1 14.30 usec  
 PLW1 12.00000000 W

F2 - Processing parameters  
 SI 65536  
 SF 400.2400102 MHz  
 WDW EM  
 SSB 0  
 LB 0.30 Hz  
 GB 0  
 FC 1.00

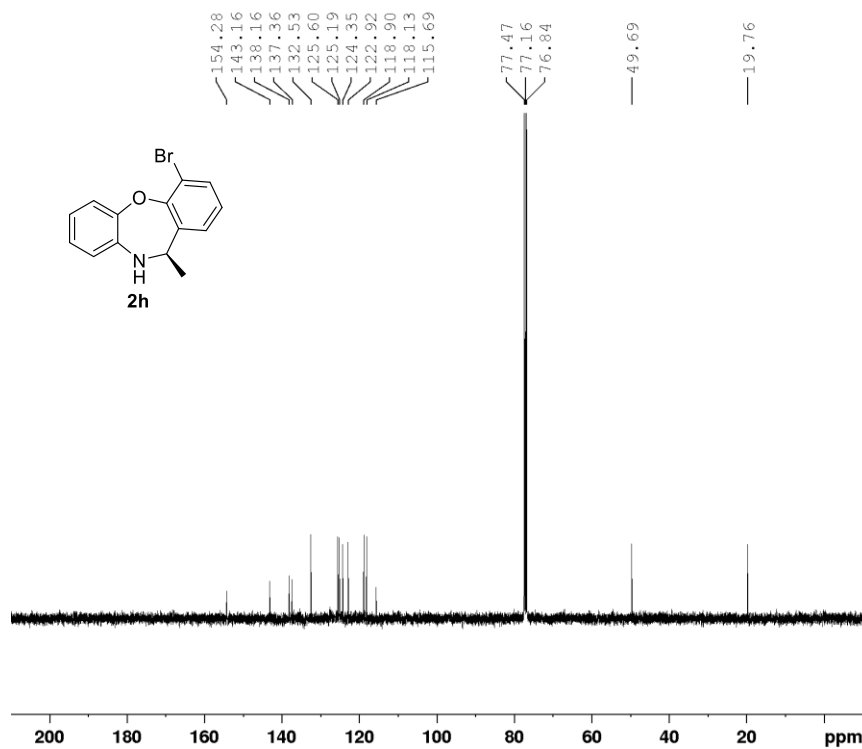

Current Data Parameters  
 NAME 500M  
 EXPNO 262  
 PROCNO 1

F2 - Acquisition Parameters  
 Date\_ 20221115  
 Time 21.00 h  
 INSTRUM spect  
 PROBHD 5 mm PABBO BB/  
 PULPROG zgpg30  
 TD 65536  
 SOLVENT CDC13  
 NS 165  
 DS 4  
 SWH 24038.461 Hz  
 FIDRES 0.733596 Hz  
 AQ 1.3631488 sec  
 RG 206.33  
 DW 20.800 usec  
 DE 6.50 usec  
 TE 298.0 K  
 D1 2.0000000 sec  
 d11 0.0300000 sec  
 DELTA 1.89999998 sec  
 TD0 1  
 SFO1 100.6504916 MHz  
 NUC1 13C  
 P1 10.00 usec  
 PLW1 54.00000000 W  
 SFO2 400.2416010 MHz  
 NUC2 1H  
 CPDPRG [2] waltz16  
 PCED2 90.00 usec  
 PLN2 12.00000000 W  
 PLW12 0.30294999 W  
 PLW13 0.24539000 W

F2 - Processing parameters  
 SI 32768  
 SF 100.6401196 MHz  
 WDW EM  
 SSB 0  
 LB 1.00 Hz  
 GB 0  
 FC 1.40

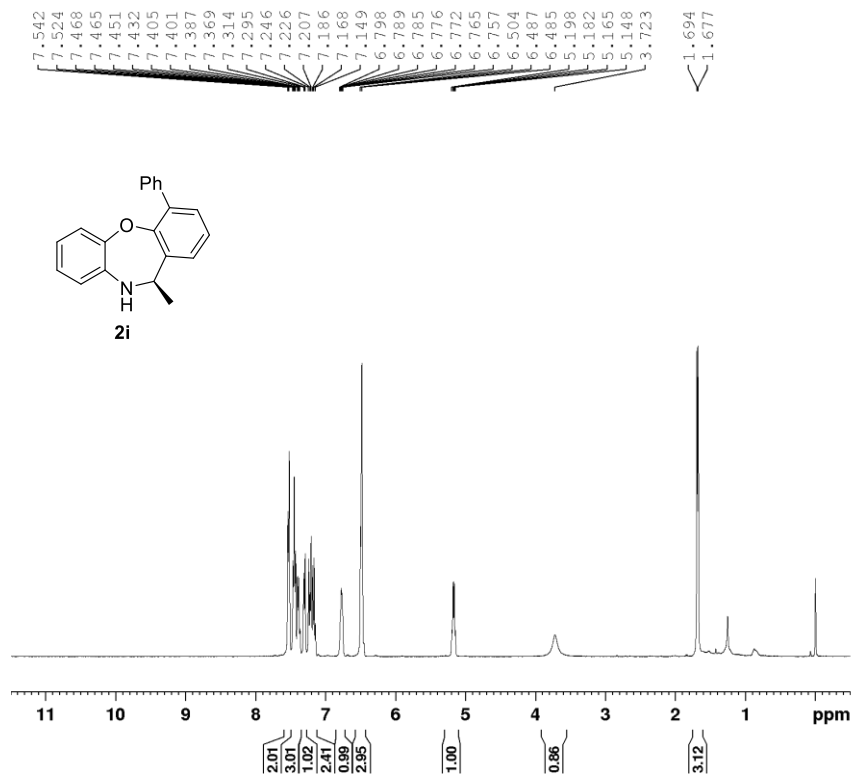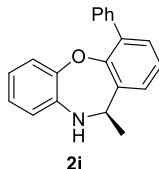

Current Data Parameters  
 NAME 500M  
 EXPNO 47  
 PROCNO 1

F2 - Acquisition Parameters  
 Date\_ 20221115  
 Time 21.11 h  
 INSTRUM spect  
 PROBHD 5 mm PABBO BB/  
 PULPROG zg30  
 TD 32768  
 SOLVENT CDC13  
 NS 16  
 DS 0  
 SWH 8012.820 Hz  
 FIDRES 0.489064 Hz  
 AQ 2.0447233 sec  
 RG 206.33  
 DW 62.400 usec  
 DE 6.50 usec  
 TE 298.0 K  
 D1 2.0000000 sec  
 TD0 1  
 SFO1 400.2424716 MHz  
 NUC1 1H  
 P1 14.30 usec  
 PLW1 12.00000000 W

F2 - Processing parameters  
 SI 65536  
 SF 400.2400155 MHz  
 WDW EM  
 SSB 0  
 LB 0.30 Hz  
 GB 0  
 FC 1.00

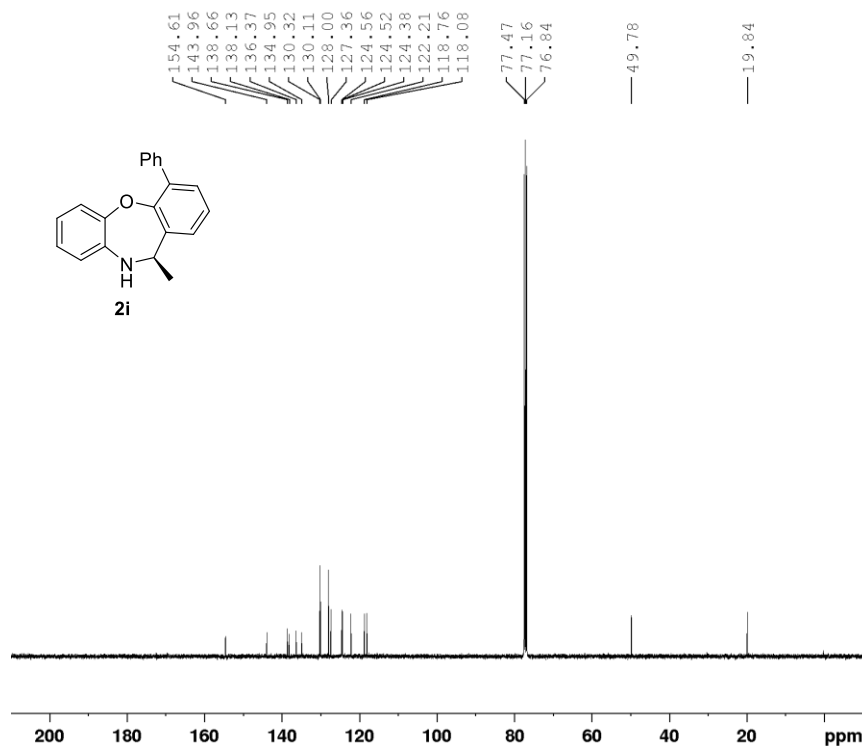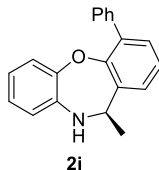

Current Data Parameters  
 NAME 500M  
 EXPNO 264  
 PROCNO 1

F2 - Acquisition Parameters  
 Date\_ 20221115  
 Time 21.13 h  
 INSTRUM spect  
 PROBHD 5 mm PABBO BB/  
 PULPROG zgpg30  
 TD 65536  
 SOLVENT CDC13  
 NS 1024  
 DS 4  
 SWH 24038.461 Hz  
 FIDRES 0.733596 Hz  
 AQ 1.3631488 sec  
 RG 206.33  
 DW 20.800 usec  
 DE 6.50 usec  
 TE 298.0 K  
 D1 2.0000000 sec  
 d11 0.0300000 sec  
 DELTA 1.89999998 sec  
 TD0 1  
 SFO1 100.6504916 MHz  
 NUC1 13C  
 P1 10.00 usec  
 PLW1 54.00000000 W  
 SFO2 400.2416010 MHz  
 NUC2 1H  
 CPDPRG [2] waltz16  
 PCPD2 90.00 usec  
 PLM2 12.00000000 W  
 PLW12 0.30294999 W  
 PLW13 0.24539000 W

F2 - Processing parameters  
 SI 32768  
 SF 100.6401611 MHz  
 WDW EM  
 SSB 0  
 LB 1.00 Hz  
 GB 0  
 FC 1.40

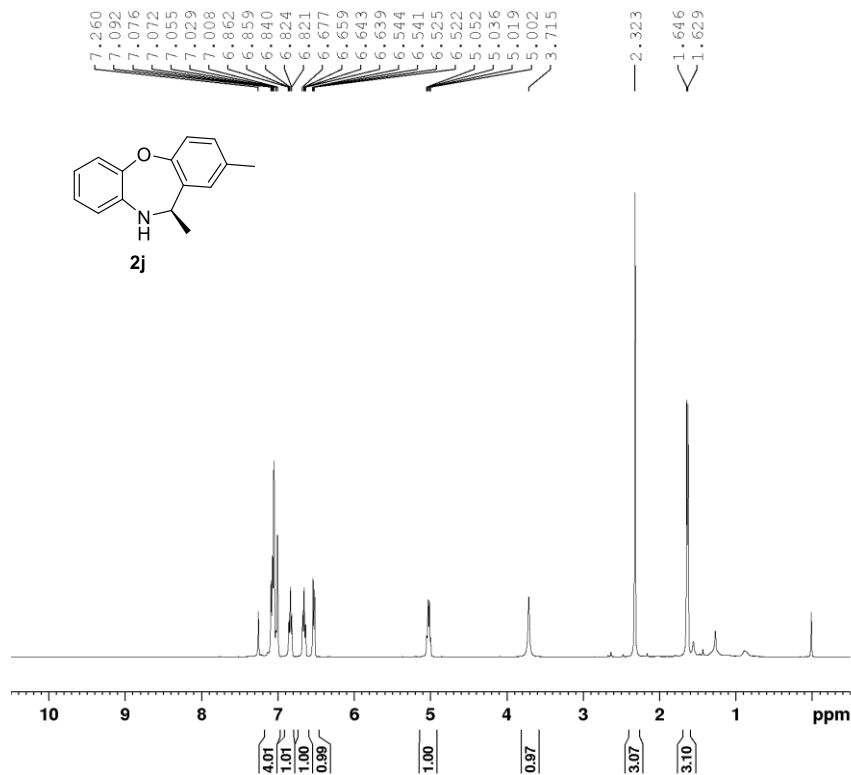

Current Data Parameters  
 NAME 500M  
 EXPNO 249  
 PROCNO 1

F2 - Acquisition Parameters  
 Date\_ 20221115  
 Time 19.00 h  
 INSTRUM spect  
 PROBHD 5 mm PABBO BB/  
 PULPROG zg30  
 TD 32768  
 SOLVENT CDC13  
 NS 16  
 DS 0  
 SWH 8012.820 Hz  
 FIDRES 0.489064 Hz  
 AQ 2.0447233 sec  
 RG 206.33  
 DW 62.400 usec  
 DE 6.50 usec  
 TE 298.0 K  
 D1 2.0000000 sec  
 TD0 1  
 SFO1 400.2424716 MHz  
 NUC1 1H  
 P1 14.30 usec  
 PLW1 12.00000000 W

F2 - Processing parameters  
 SI 65536  
 SF 400.2400101 MHz  
 WDW EM  
 SSB 0  
 LB 0.30 Hz  
 GB 0  
 FC 1.00

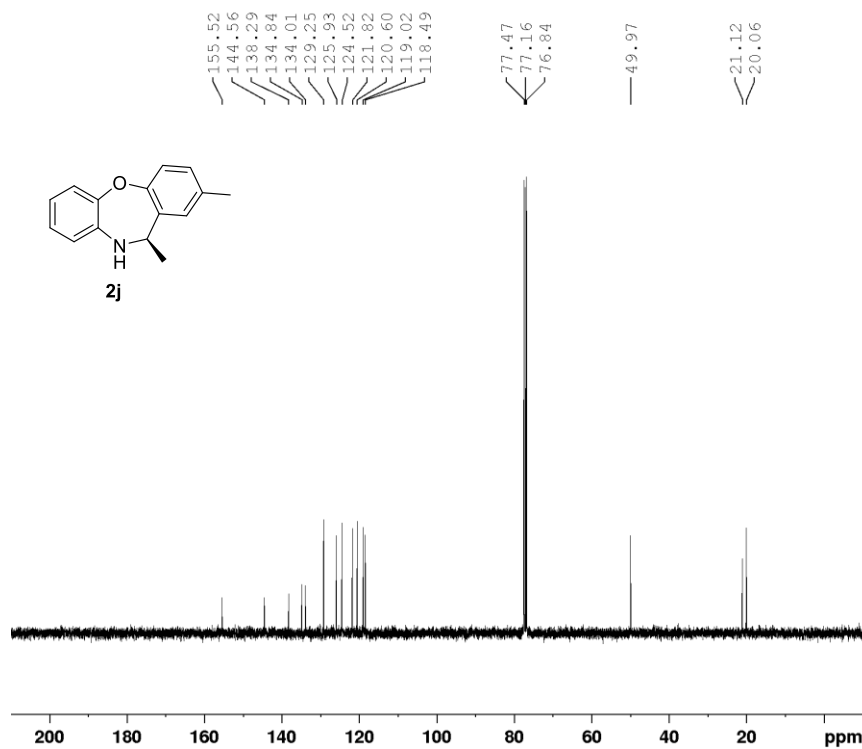

Current Data Parameters  
 NAME 500M  
 EXPNO 250  
 PROCNO 1

F2 - Acquisition Parameters  
 Date\_ 20221115  
 Time 19.03 h  
 INSTRUM spect  
 PROBHD 5 mm PABBO BB/  
 PULPROG zgpg30  
 TD 65536  
 SOLVENT CDC13  
 NS 102  
 DS 4  
 SWH 24038.461 Hz  
 FIDRES 0.733596 Hz  
 AQ 1.3631488 sec  
 RG 206.33  
 DW 20.800 usec  
 DE 6.50 usec  
 TE 298.0 K  
 D1 2.0000000 sec  
 d11 0.0300000 sec  
 DELTA 1.89999998 sec  
 TD0 1  
 SFO1 100.6504916 MHz  
 NUC1 13C  
 P1 10.00 usec  
 PLW1 54.00000000 W  
 SFO2 400.2416010 MHz  
 NUC2 1H  
 CPDPRG2 waltz16  
 PCDD2 90.00 usec  
 PLN2 12.00000000 W  
 PLW2 0.30294999 W  
 PLW3 0.24539000 W

F2 - Processing parameters  
 SI 32768  
 SF 100.6404280 MHz  
 WDW EM  
 SSB 0  
 LB 1.00 Hz  
 GB 0  
 FC 1.40

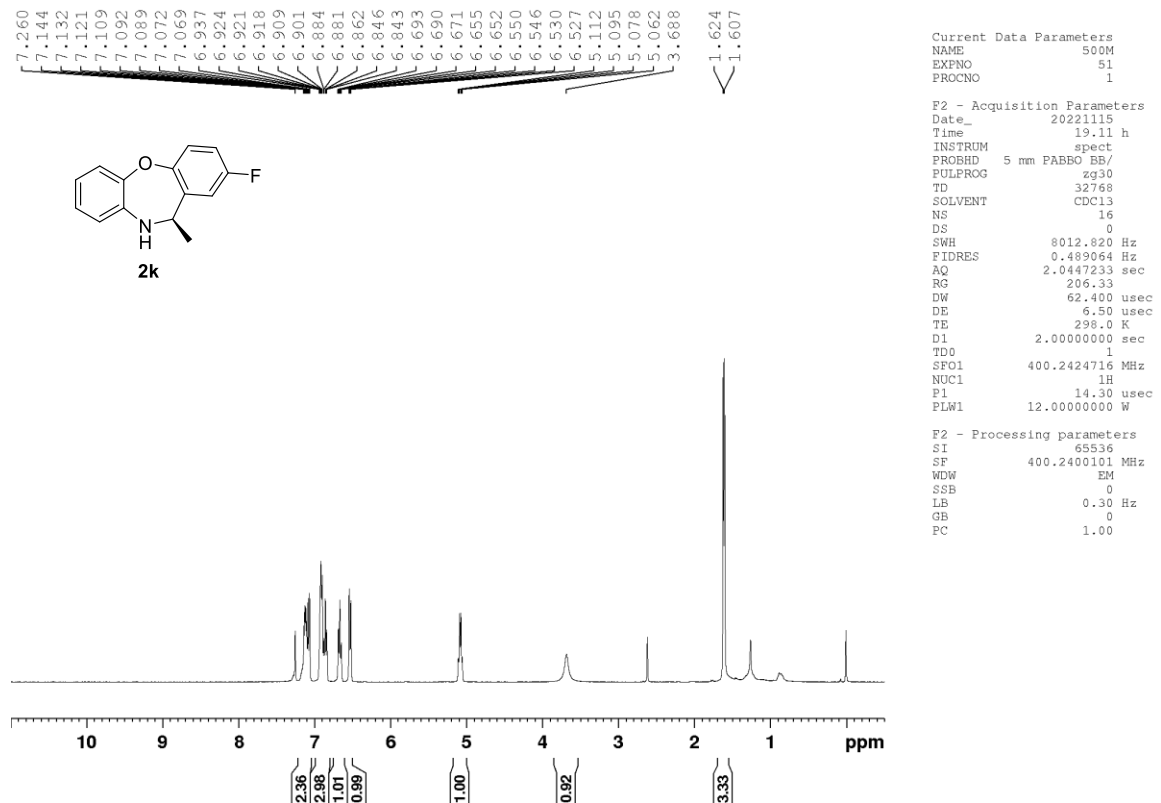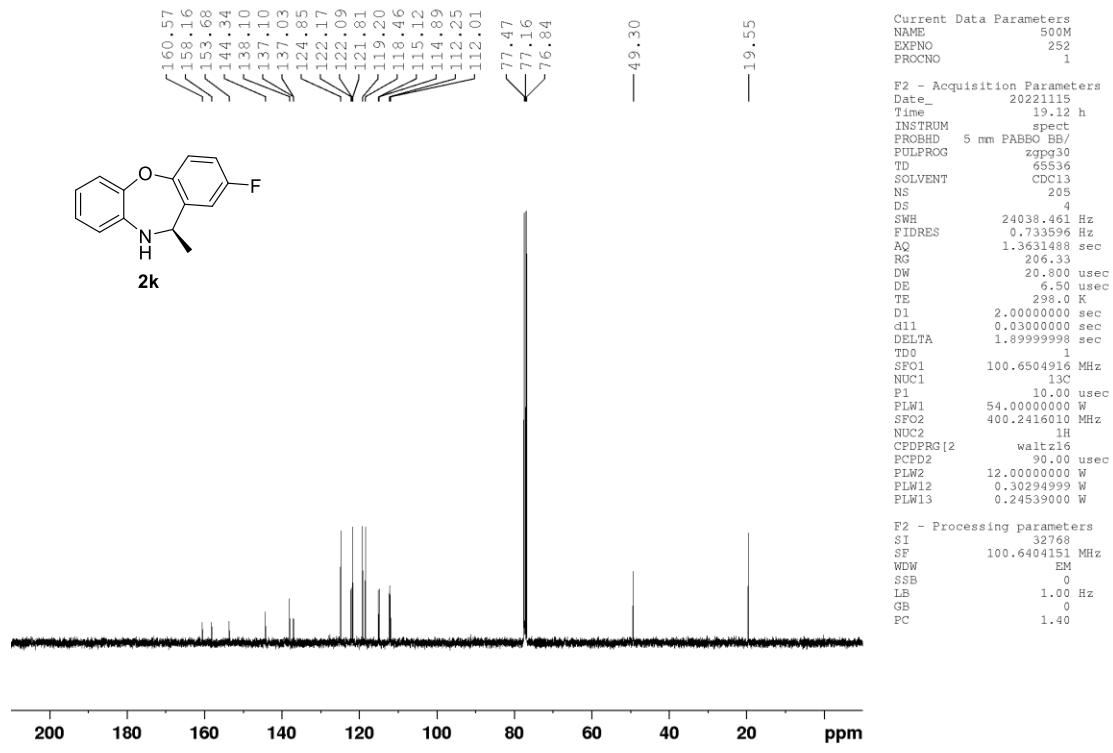

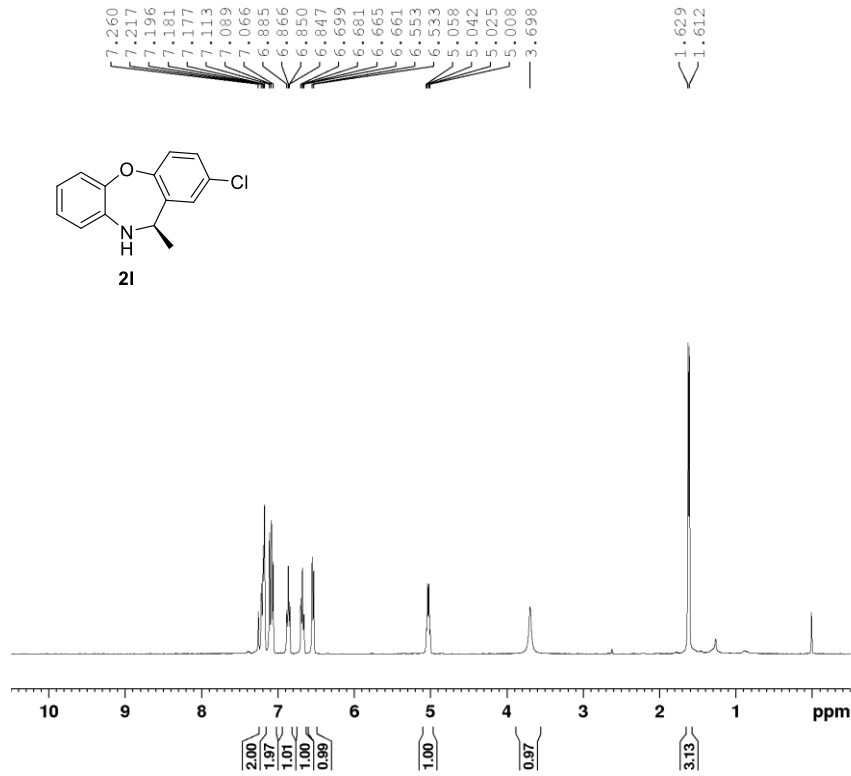

Current Data Parameters  
 NAME 500M  
 EXPNO 253  
 PROCNO 1

F2 - Acquisition Parameters  
 Date\_ 20221115  
 Time 19:32 h  
 INSTRUM spect  
 PROBHD 5 mm PABBO BB/  
 PULPROG zg30  
 TD 32768  
 SOLVENT CDC13  
 NS 16  
 DS 0  
 SWH 8012.820 Hz  
 FIDRES 0.489064 Hz  
 AQ 2.0447233 sec  
 RG 205.33  
 DW 62.400 usec  
 DE 6.50 usec  
 TE 298.0 K  
 D1 2.00000000 sec  
 TD0 1  
 SFO1 400.2424716 MHz  
 NUC1 1H  
 P1 14.30 usec  
 PLW1 12.00000000 W

F2 - Processing parameters  
 SI 65536  
 SF 400.2400100 MHz  
 WDW EM  
 SSB 0  
 LB 0.30 Hz  
 GB 0  
 PC 1.00

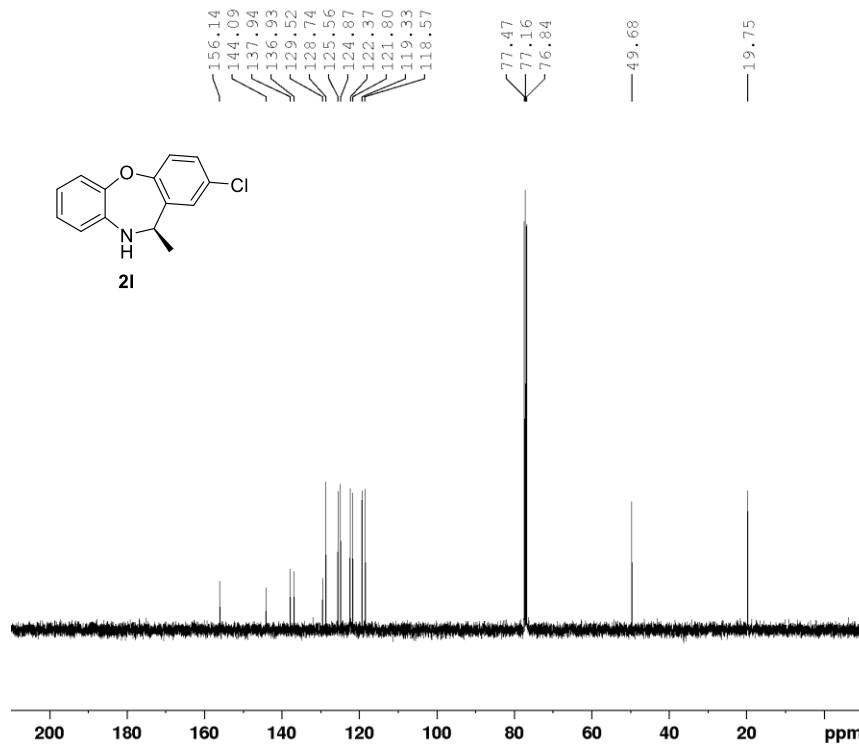

Current Data Parameters  
 NAME 500M  
 EXPNO 254  
 PROCNO 1

F2 - Acquisition Parameters  
 Date\_ 20221115  
 Time 19:27 h  
 INSTRUM spect  
 PROBHD 5 mm PABBO BB/  
 PULPROG zgpg30  
 TD 65536  
 SOLVENT CDC13  
 NS 86  
 DS 4  
 SWH 24038.461 Hz  
 FIDRES 0.733596 Hz  
 AQ 1.3631488 sec  
 RG 205.33  
 DW 20.800 usec  
 DE 6.50 usec  
 TE 298.0 K  
 D1 2.00000000 sec  
 d11 0.03000000 sec  
 DELTA 1.89999998 sec  
 TD0 1  
 SFO1 100.6504916 MHz  
 NUC1 13C  
 P1 10.00 usec  
 PLW1 54.00000000 W  
 SFO2 400.2416010 MHz  
 NUC2 1H  
 CPDPRG2 waltz16  
 PCPD2 90.00 usec  
 PLW2 12.00000000 W  
 PLW12 0.30294999 W  
 PLW13 0.24539000 W

F2 - Processing parameters  
 SI 32768  
 SF 100.6404161 MHz  
 WDW EM  
 SSB 0  
 LB 1.00 Hz  
 GB 0  
 PC 1.40

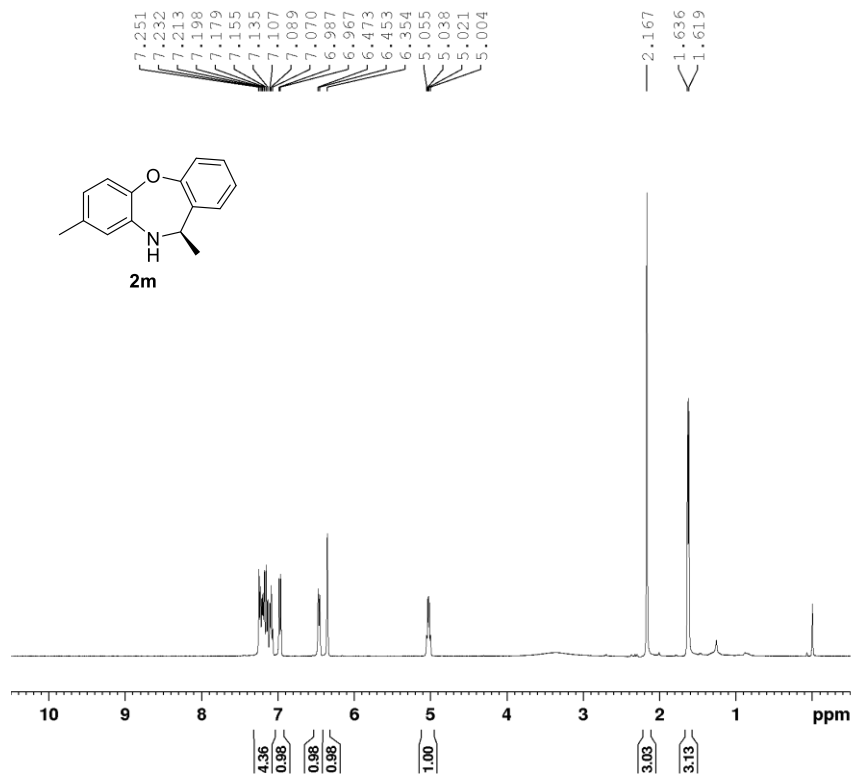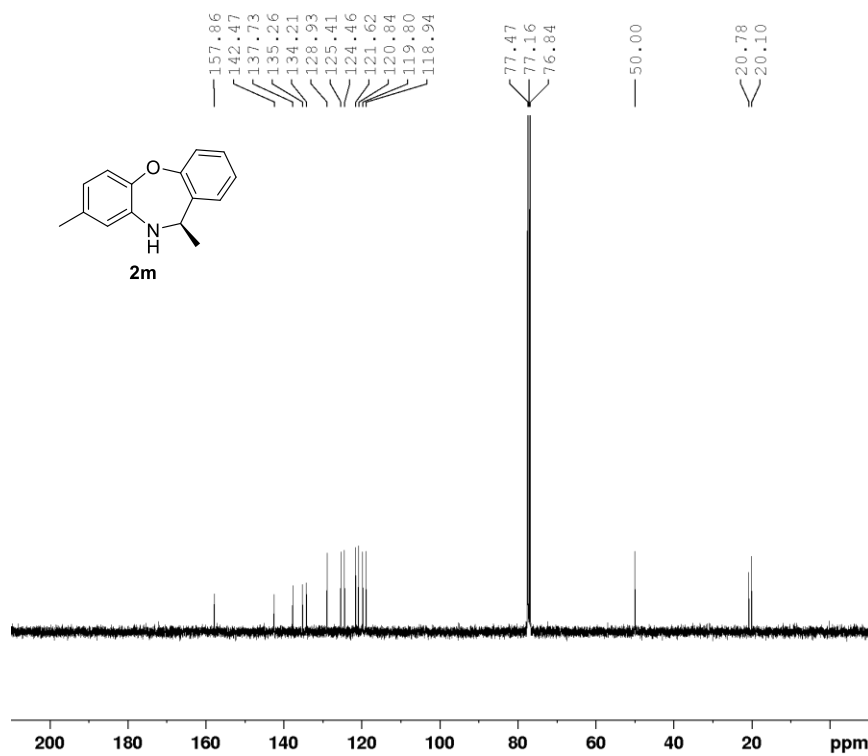

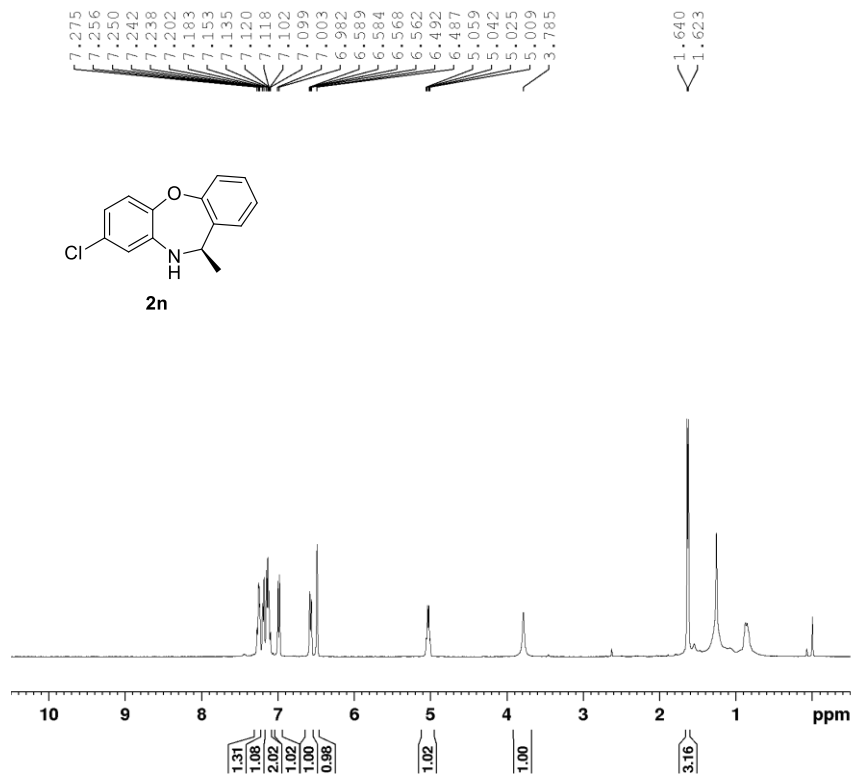

Current Data Parameters  
 NAME 500M  
 EXPNO 63  
 PROCNO 1

F2 - Acquisition Parameters  
 Date\_ 20221116  
 Time 12.17 h  
 INSTRUM spect  
 PROBHD 5 mm PABBO BB/  
 PULPROG zg30  
 TD 32768  
 SOLVENT CDC13  
 NS 16  
 DS 0  
 SWH 8012.820 Hz  
 FIDRES 0.489064 Hz  
 AQ 2.0447233 sec  
 RG 206.33  
 DW 62.400 usec  
 DE 6.50 usec  
 TE 298.0 K  
 D1 2.0000000 sec  
 TD0 1  
 SFO1 400.2424716 MHz  
 NUC1 1H  
 P1 14.30 usec  
 PLW1 12.00000000 W

F2 - Processing parameters  
 SI 65536  
 SF 400.2400142 MHz  
 WDW EM  
 SSB 0  
 LB 0.30 Hz  
 GB 0  
 FC 1.00

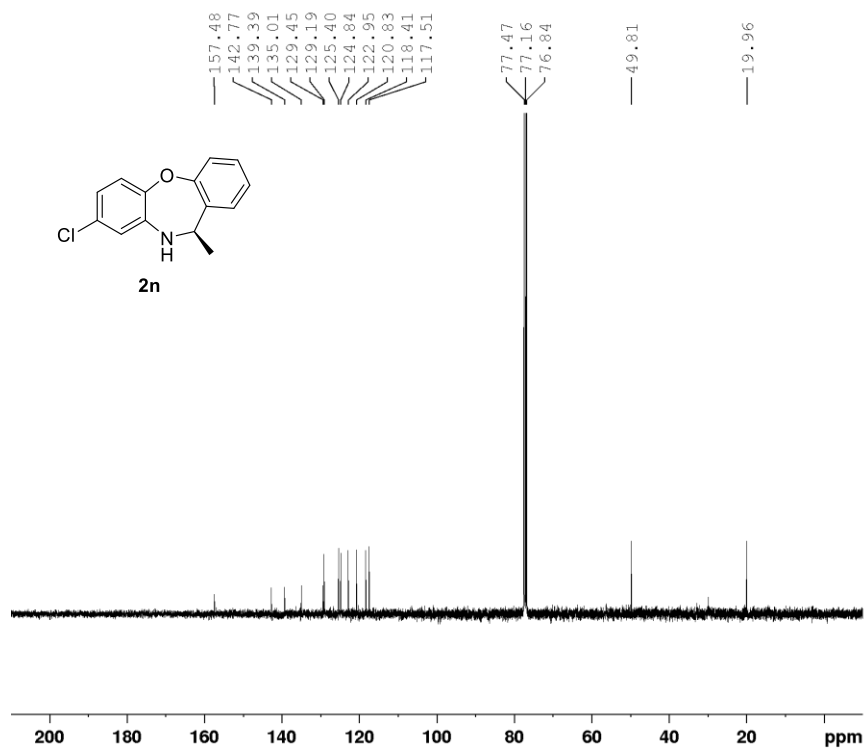

Current Data Parameters  
 NAME 500M  
 EXPNO 64  
 PROCNO 1

F2 - Acquisition Parameters  
 Date\_ 20221116  
 Time 12.21 h  
 INSTRUM spect  
 PROBHD 5 mm PABBO BB/  
 PULPROG zgpg30  
 TD 65536  
 SOLVENT CDC13  
 NS 169  
 DS 4  
 SWH 24038.461 Hz  
 FIDRES 0.733596 Hz  
 AQ 1.3631488 sec  
 RG 206.33  
 DW 20.800 usec  
 DE 6.50 usec  
 TE 298.0 K  
 D1 2.0000000 sec  
 d11 0.0300000 sec  
 DELTA 1.89999998 sec  
 TD0 1  
 SFO1 100.6504916 MHz  
 NUC1 13C  
 P1 10.00 usec  
 PLW1 54.00000000 W  
 SFO2 400.2416010 MHz  
 NUC2 1H  
 CPDPRG [2] waltz16  
 PCED2 90.00 usec  
 PLN2 12.00000000 W  
 PLW12 0.30294999 W  
 PLW13 0.24539000 W

F2 - Processing parameters  
 SI 32768  
 SF 100.6401461 MHz  
 WDW EM  
 SSB 0  
 LB 1.00 Hz  
 GB 0  
 FC 1.40



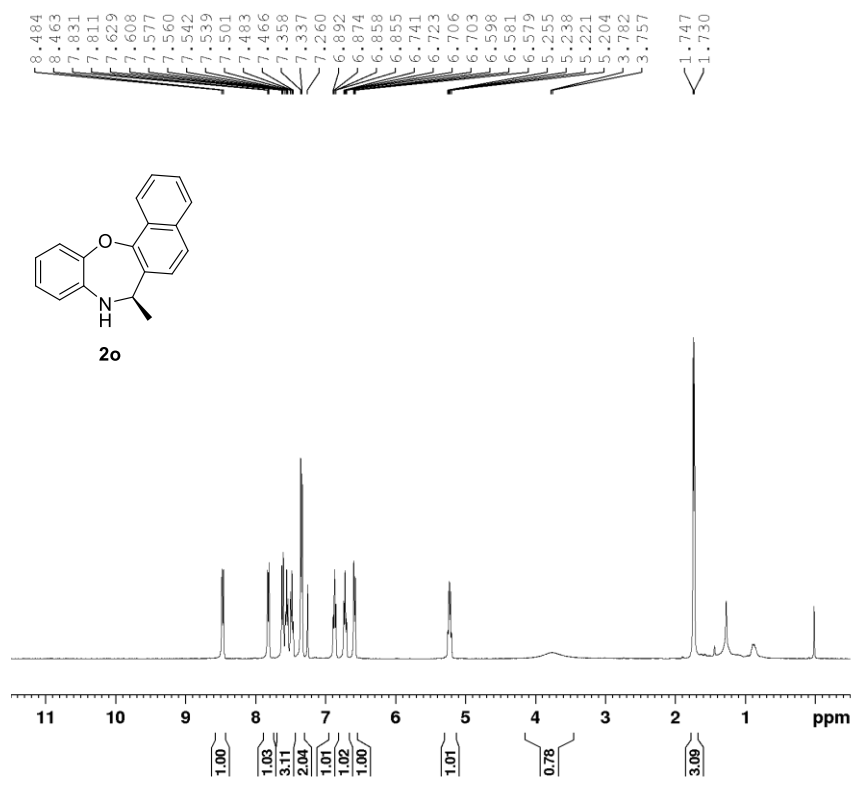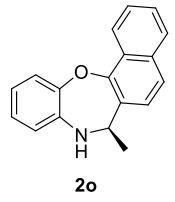

Current Data Parameters  
 NAME 500M  
 EXPNO 59  
 PROCNO 1

F2 - Acquisition Parameters  
 Date\_ 20221115  
 Time 20.43 h  
 INSTRUM spect  
 PROBHD 5 mm PABBO BB/  
 PULPROG zg30  
 TD 32768  
 SOLVENT CDCl3  
 NS 16  
 DS 0  
 SWH 8012.820 Hz  
 FIDRES 0.489064 Hz  
 AQ 2.0447233 sec  
 RG 206.33  
 DW 62.400 usec  
 DE 6.50 usec  
 TE 298.0 K  
 D1 2.0000000 sec  
 TDO 1  
 SFO1 400.2424716 MHz  
 NUC1 1H  
 P1 14.30 usec  
 PLW1 12.0000000 W

F2 - Processing parameters  
 SI 65536  
 SF 400.2400097 MHz  
 WDW EM  
 SSB 0  
 LB 0.30 Hz  
 GB 0  
 PC 1.00

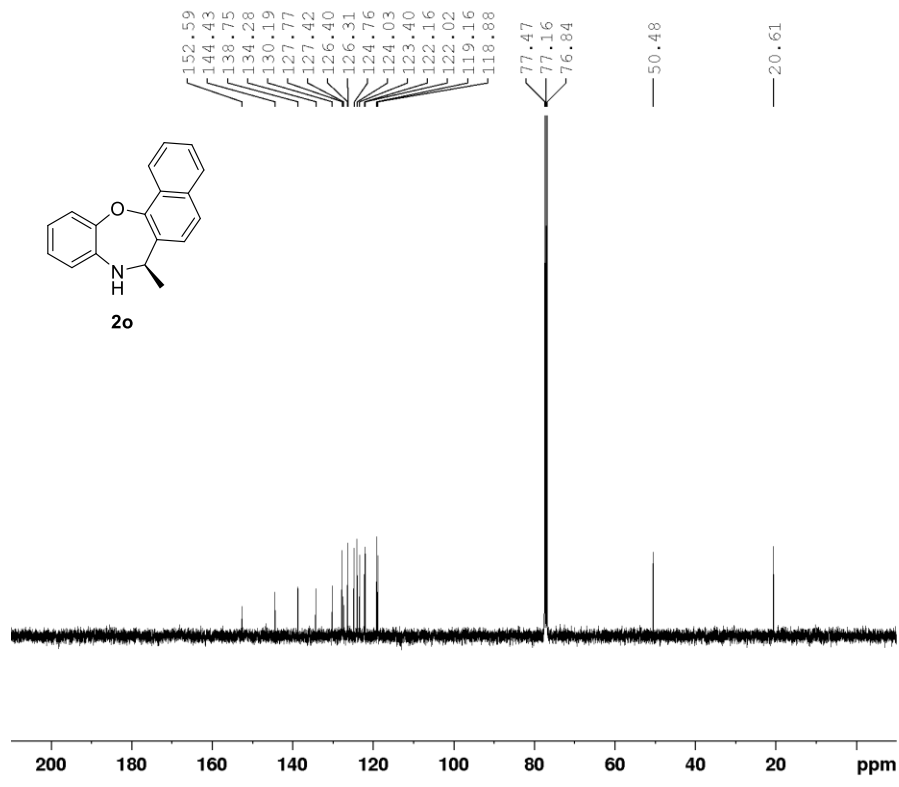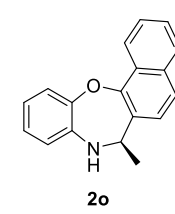

Current Data Parameters  
 NAME 500M  
 EXPNO 60  
 PROCNO 1

F2 - Acquisition Parameters  
 Date\_ 20221115  
 Time 20.44 h  
 INSTRUM spect  
 PROBHD 5 mm PABBO BB/  
 PULPROG zgpg30  
 TD 65536  
 SOLVENT CDCl3  
 NS 197  
 DS 4  
 SWH 24038.461 Hz  
 FIDRES 0.733596 Hz  
 AQ 1.3631488 sec  
 RG 206.33  
 DW 20.800 usec  
 DE 6.50 usec  
 TE 298.1 K  
 D1 2.0000000 sec  
 d11 0.0300000 sec  
 DELTA 1.89999998 sec  
 TDO 1  
 SFO1 100.6504916 MHz  
 NUC1 13C  
 P1 10.00 usec  
 PLW1 54.0000000 W  
 SFO2 400.2416010 MHz  
 NUC2 1H  
 CPDPRG2 waltz16  
 ECPD2 90.00 usec  
 PLW2 12.0000000 W  
 PLW12 0.30294999 W  
 PLW13 0.24539000 W

F2 - Processing parameters  
 SI 32768  
 SF 100.6404168 MHz  
 WDW EM  
 SSB 0  
 LB 1.00 Hz  
 GB 0  
 PC 1.40

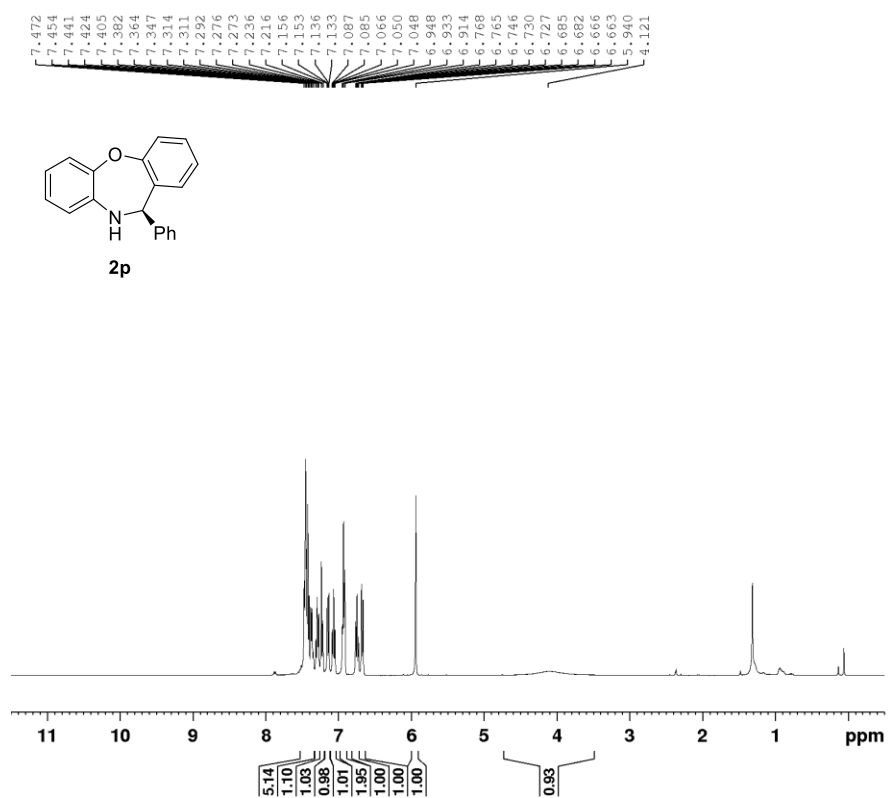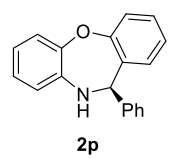

Current Data Parameters  
 NAME 500M  
 EXPNO 67  
 PROCNO 1

F2 - Acquisition Parameters  
 Date\_ 20230306  
 Time 5.27 h  
 INSTRUM spect  
 PROBHD 5 mm PABBO BB/  
 PULPROG zg30  
 TD 32768  
 SOLVENT CDC13  
 NS 16  
 DS 0  
 SWH 8012.820 Hz  
 FIDRES 0.489064 Hz  
 AQ 2.0447233 sec  
 RG 162.77  
 DW 62.400 usec  
 DE 6.50 usec  
 TE 300.9 K  
 D1 2.00000000 sec  
 TD0 1  
 SFO1 400.2424716 MHz  
 NUC1 1H  
 P1 14.30 usec  
 PLW1 12.00000000 W

F2 - Processing parameters  
 SI 65536  
 SF 400.2400000 MHz  
 WDW EM  
 SSB 0  
 LB 0.30 Hz  
 GB 0  
 PC 1.00

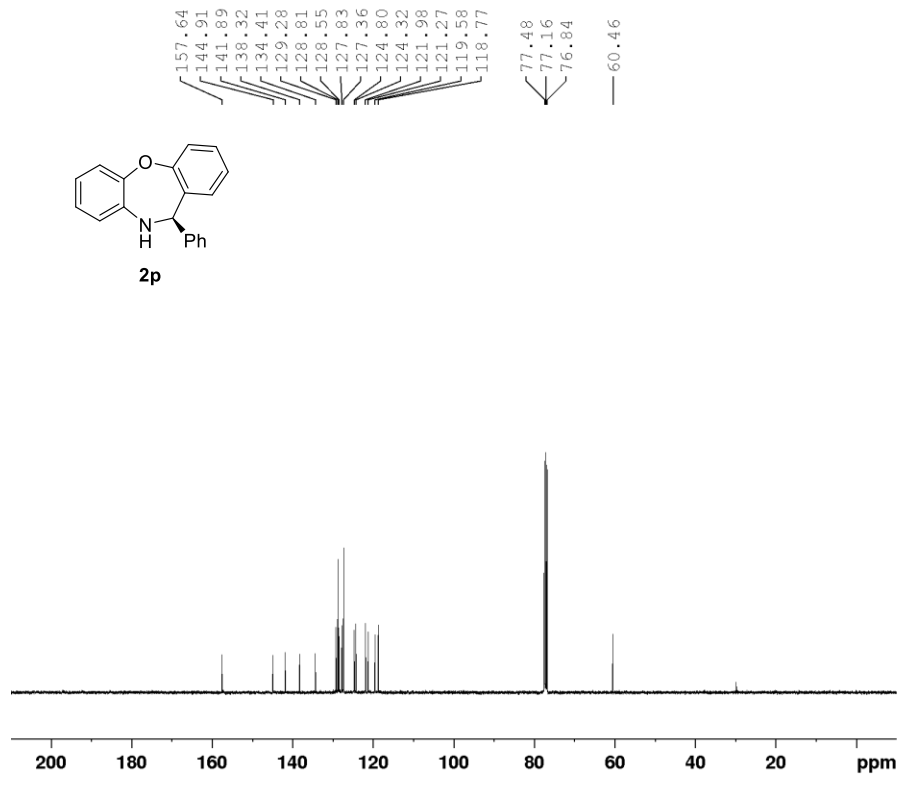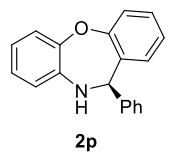

Current Data Parameters  
 NAME 500M  
 EXPNO 68  
 PROCNO 1

F2 - Acquisition Parameters  
 Date\_ 20230306  
 Time 6.26 h  
 INSTRUM spect  
 PROBHD 5 mm PABBO BB/  
 PULPROG zgpg30  
 TD 65536  
 SOLVENT CDC13  
 NS 1024  
 DS 4  
 SWH 24038.461 Hz  
 FIDRES 0.733596 Hz  
 AQ 1.3631488 sec  
 RG 206.33  
 DW 20.800 usec  
 DE 6.50 usec  
 TE 301.5 K  
 D1 2.00000000 sec  
 d11 0.03000000 sec  
 DELTA 1.89999998 sec  
 TD0 1  
 SFO1 100.6504916 MHz  
 NUC1 13C  
 P1 10.00 usec  
 PLW1 54.00000000 W  
 SFO2 400.2416010 MHz  
 NUC2 1H  
 CPDPRG2 waltz16  
 PCPD2 90.00 usec  
 PLW2 12.00000000 W  
 PLW12 0.30294999 W  
 PLW13 0.24539000 W

F2 - Processing parameters  
 SI 32768  
 SF 100.6404168 MHz  
 WDW EM  
 SSB 0  
 LB 1.00 Hz  
 GB 0  
 PC 1.40

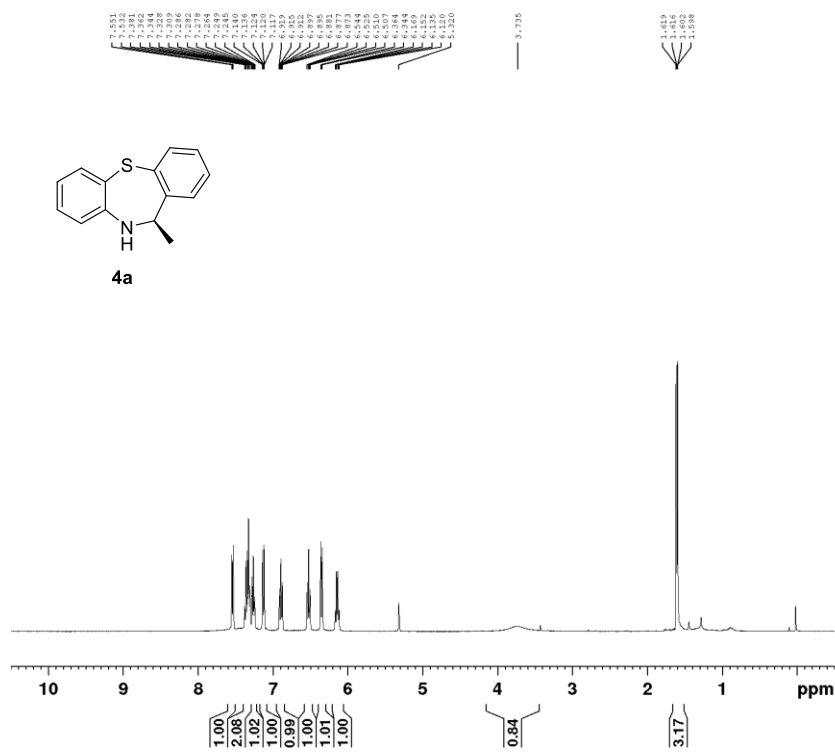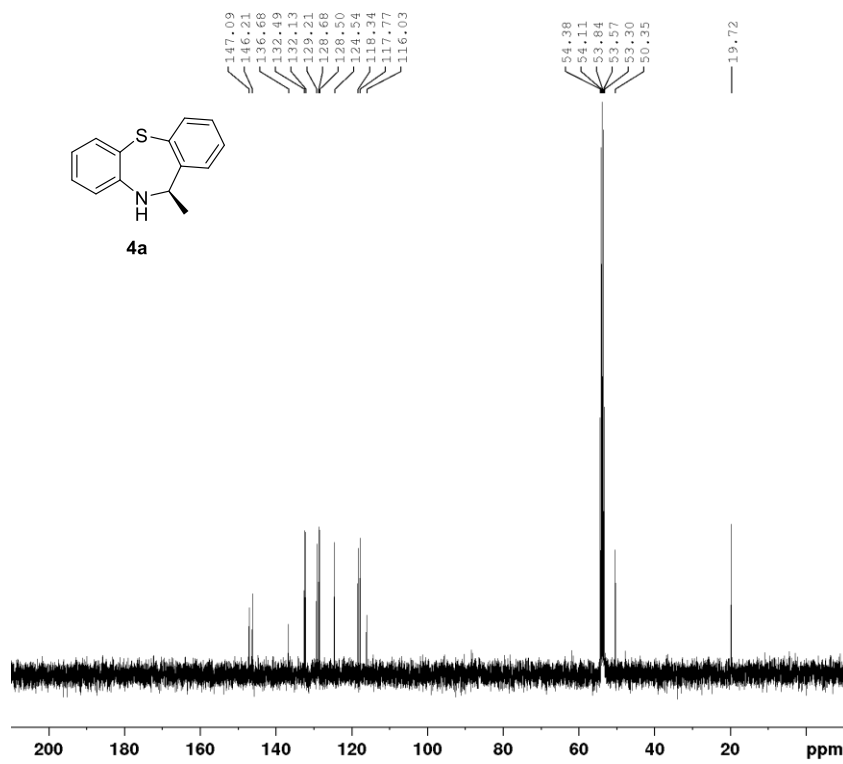

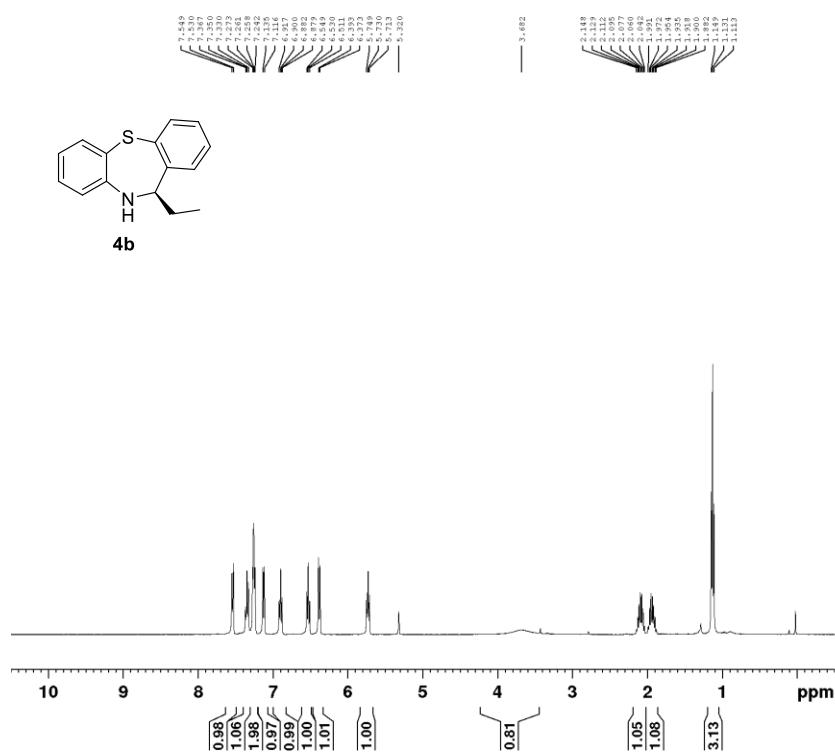

Current Data Parameters  
 NAME 2022-11-12-VZQ-S-Et-QH-Pro  
 EXPNO 1  
 PROCNO 1

F2 - Acquisition Parameters  
 Date\_ 20221112  
 Time 1.54 h  
 INSTRUM spect  
 PROBHD 5 mm PABBO BB/  
 PULPROG zg30  
 TD 32768  
 SOLVENT CD2Cl2  
 NS 4  
 DS 0  
 SWH 8012.820 Hz  
 FIDRES 0.489064 Hz  
 AQ 2.0447233 sec  
 RG 102.73  
 DW 62.400 usec  
 DE 6.50 usec  
 TE 299.8 K  
 D1 2.0000000 sec  
 TD0 1  
 SFO1 400.2424716 MHz  
 NUC1 1H  
 P1 14.30 usec  
 PLW1 12.0000000 W

F2 - Processing parameters  
 SI 65536  
 SF 400.2400154 MHz  
 WDW EM  
 SSB 0  
 LB 0.30 Hz  
 GB 0  
 PC 1.00

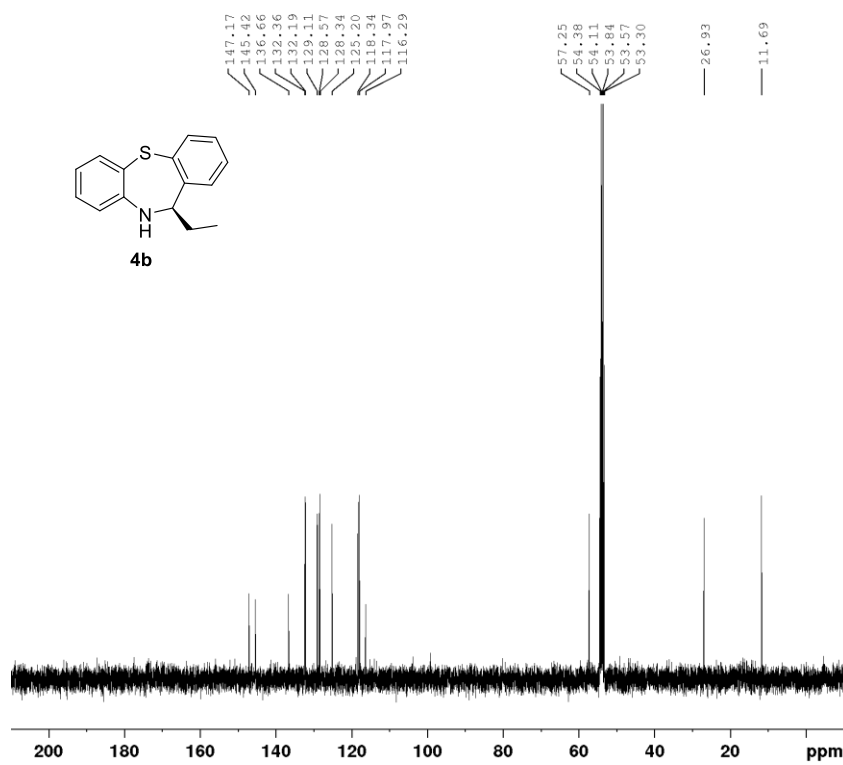

Current Data Parameters  
 NAME 2022-11-12-VZQ-S-Et-QH-Pro  
 EXPNO 2  
 PROCNO 1

F2 - Acquisition Parameters  
 Date\_ 20221112  
 Time 1.56 h  
 INSTRUM spect  
 PROBHD 5 mm PABBO BB/  
 PULPROG zgpg30  
 TD 65536  
 SOLVENT CD2Cl2  
 NS 64  
 DS 4  
 SWH 24038.461 Hz  
 FIDRES 0.733596 Hz  
 AQ 1.3631488 sec  
 RG 206.33  
 DW 20.800 usec  
 DE 6.50 usec  
 TE 300.3 K  
 D1 2.0000000 sec  
 d11 0.0300000 sec  
 DELTA 1.8999999 sec  
 TD0 1  
 SFO1 100.6504916 MHz  
 NUC1 13C  
 P1 10.00 usec  
 PLW1 54.0000000 W  
 SFO2 400.2416010 MHz  
 NUC2 1H  
 CDPFRG2 waltz16  
 ECFD2 90.00 usec  
 PLW2 12.0000000 W  
 PLW3 0.3029499 W  
 PLW13 0.2453900 W

F2 - Processing parameters  
 SI 32768  
 SF 100.6403867 MHz  
 WDW EM  
 SSB 0  
 LB 1.00 Hz  
 GB 0  
 FC 1.40

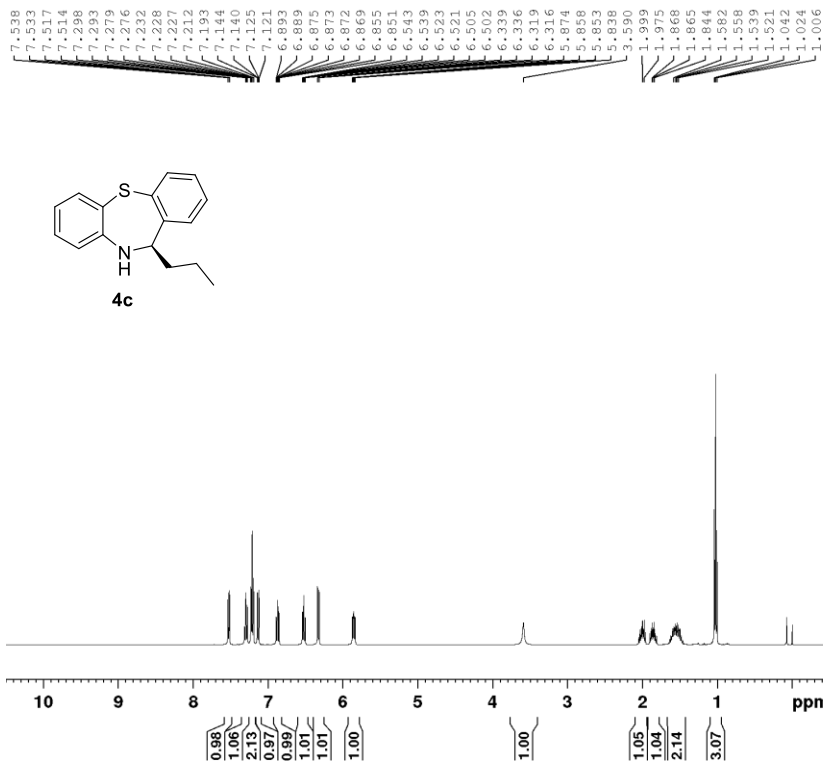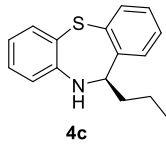

Current Data Parameters  
NAME 2022-11-01-YZ0-S-n-Prop-QH-Pro  
EXPNO 1  
PROCNO 1

F2 - Acquisition Parameters  
Date\_ 20221101  
Time 21.20 h  
INSTRUM spect  
PROBHD 5 mm PABBO BB/  
PULPROG zg30  
TD 32768  
SOLVENT CDCl3  
NS 8  
DS 0  
SWH 8012.820 Hz  
FIDRES 0.489064 Hz  
AQ 2.0447233 sec  
RG 73.9  
DW 62.400 usec  
DE 6.50 usec  
TE 298.0 K  
D1 2.0000000 sec  
TDO 1  
SFO1 400.2424716 MHz  
NUC1 1H  
P1 14.30 usec  
PLW1 12.0000000 W

F2 - Processing parameters  
SI 65536  
SF 400.2400231 MHz  
WDW EM  
SSB 0  
LB 0.30 Hz  
GB 0  
PC 1.00

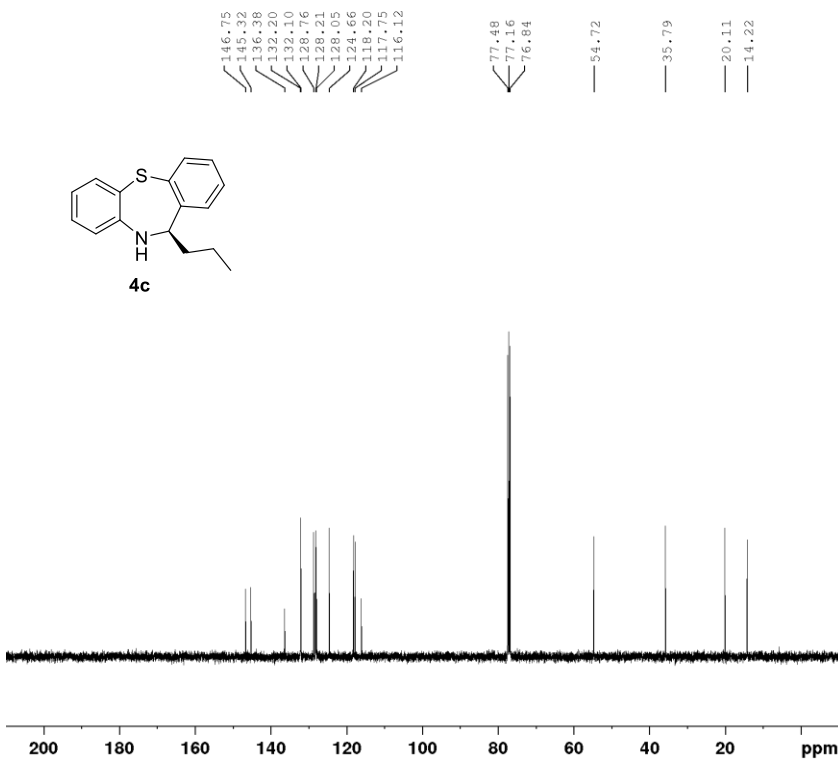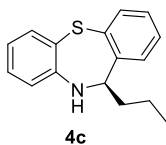

Current Data Parameters  
NAME 2022-11-01-YZ0-S-n-Prop-QH-Pro  
EXPNO 2  
PROCNO 1

F2 - Acquisition Parameters  
Date\_ 20221101  
Time 21.24 h  
INSTRUM spect  
PROBHD 5 mm PABBO BB/  
PULPROG zgpg30  
TD 65536  
SOLVENT CDCl3  
NS 80  
DS 4  
SWH 24038.461 Hz  
FIDRES 0.733596 Hz  
AQ 1.3631488 sec  
RG 206.33  
DW 20.800 usec  
DE 6.50 usec  
TE 298.0 K  
D1 2.0000000 sec  
d11 0.0300000 sec  
DELTA 1.8999999 sec  
TDO 1  
SFO1 100.6504916 MHz  
NUC1 13C  
P1 10.00 usec  
PLW1 54.0000000 W  
SFO2 400.2416010 MHz  
NUC2 1H  
CPDPRG2 waltz16  
PCPD2 90.00 usec  
PLM2 12.0000000 W  
PLW2 0.30294999 W  
PLM3 0.24539000 W

F2 - Processing parameters  
SI 32768  
SF 100.6404201 MHz  
WDW EM  
SSB 0  
LB 1.00 Hz  
GB 0  
PC 1.40

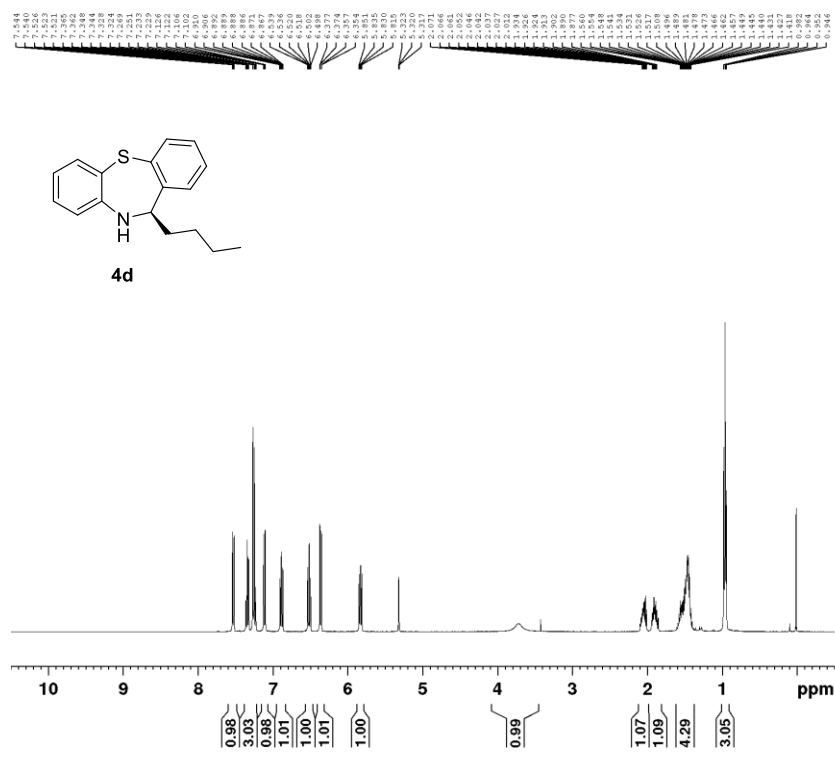



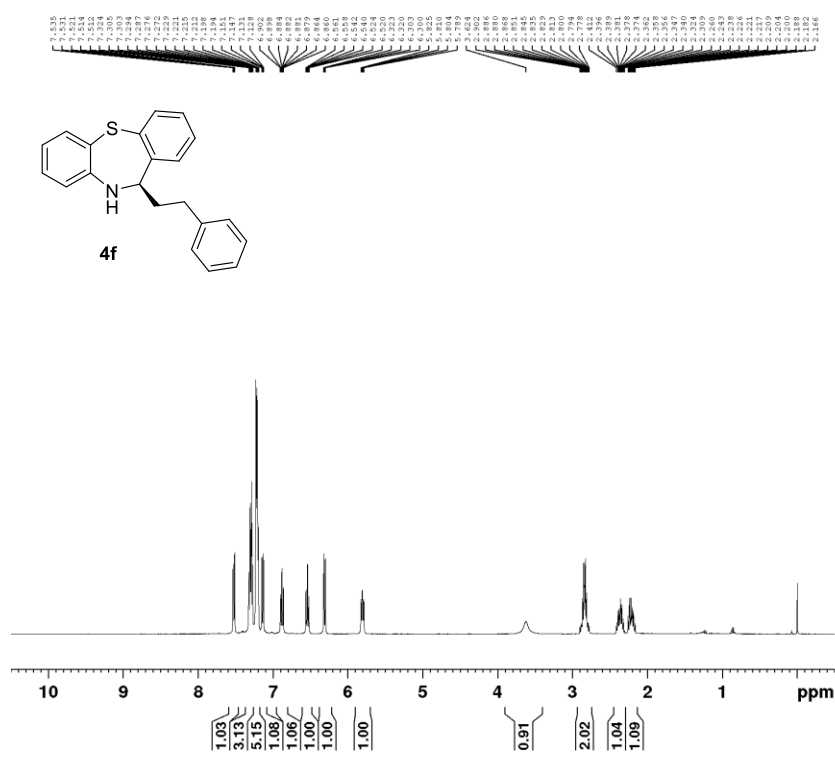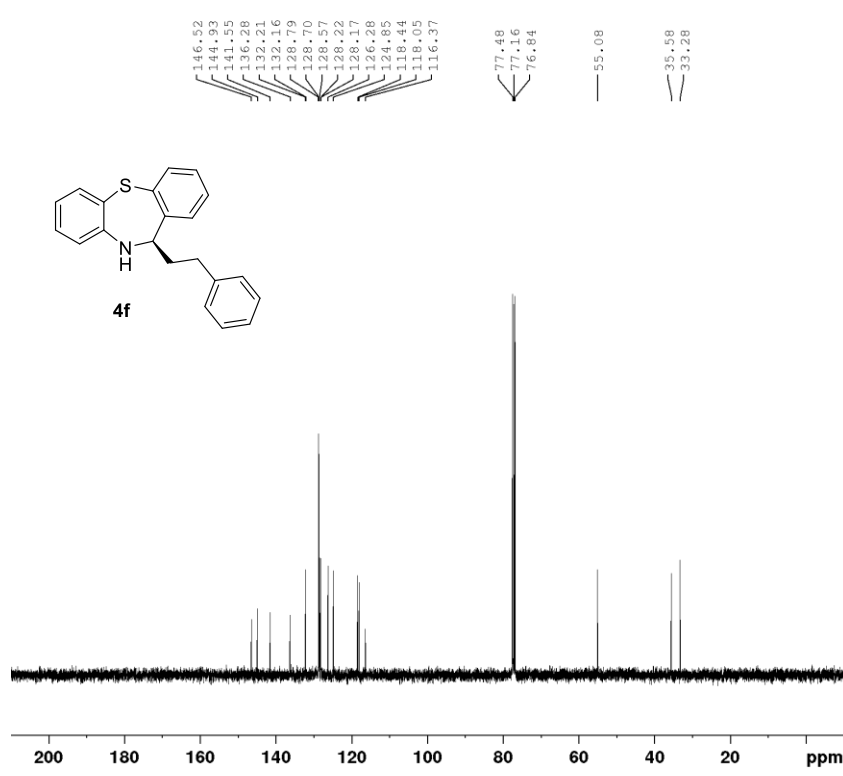



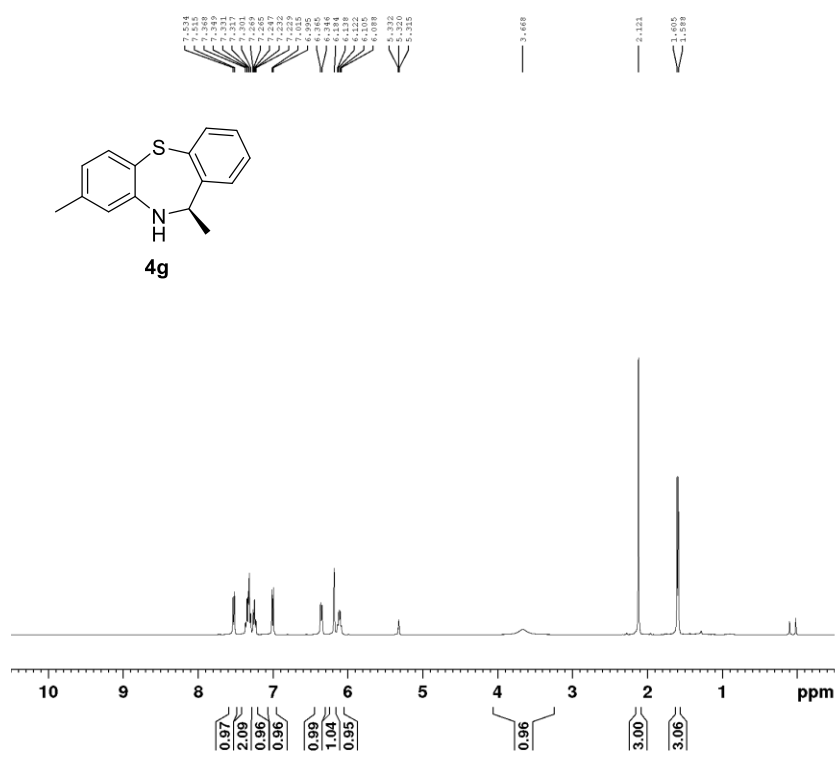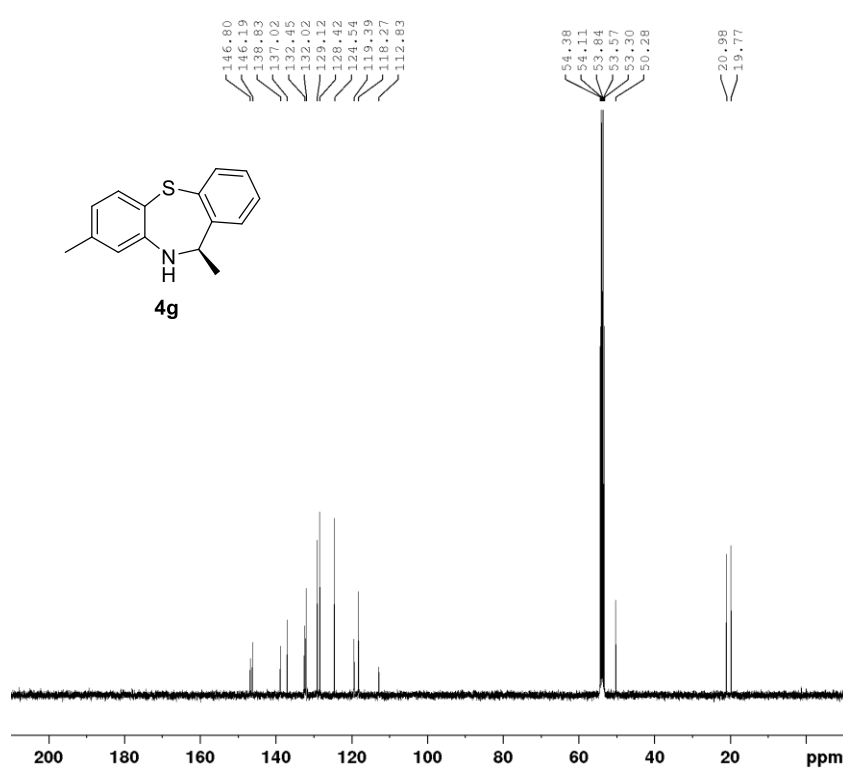

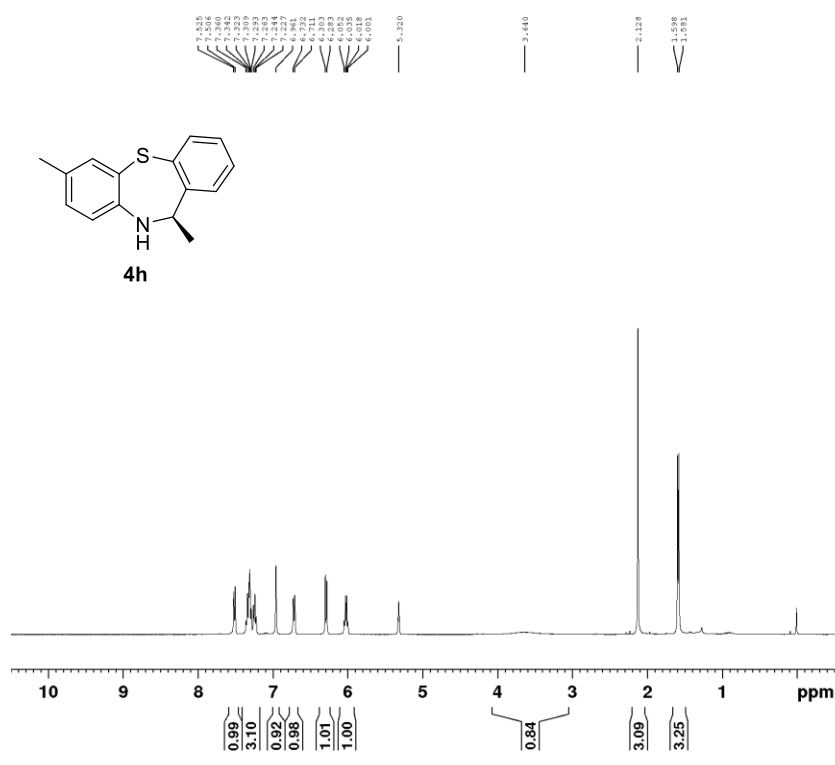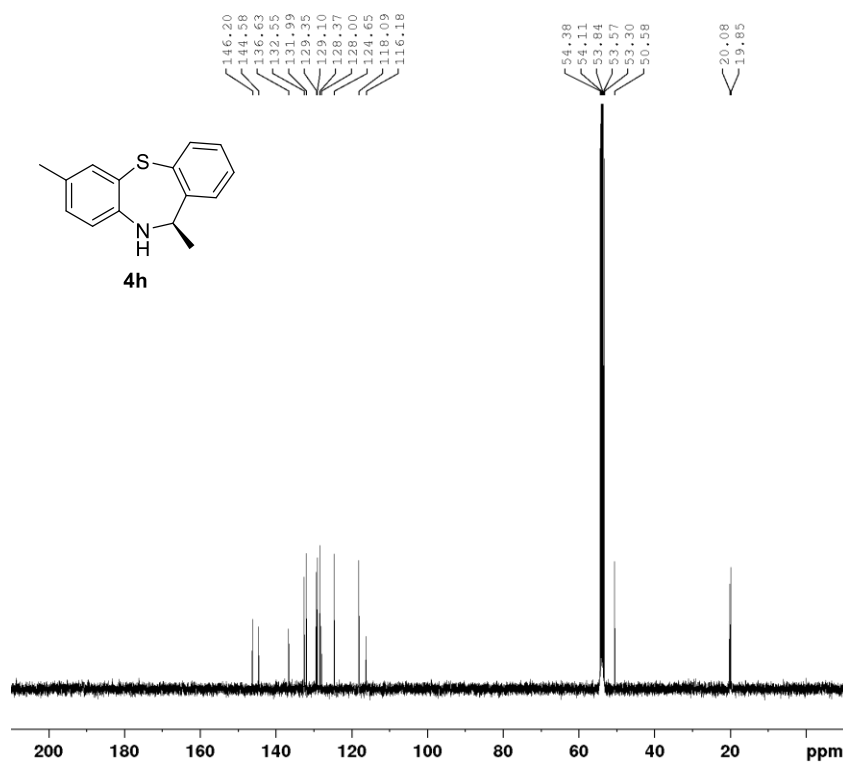

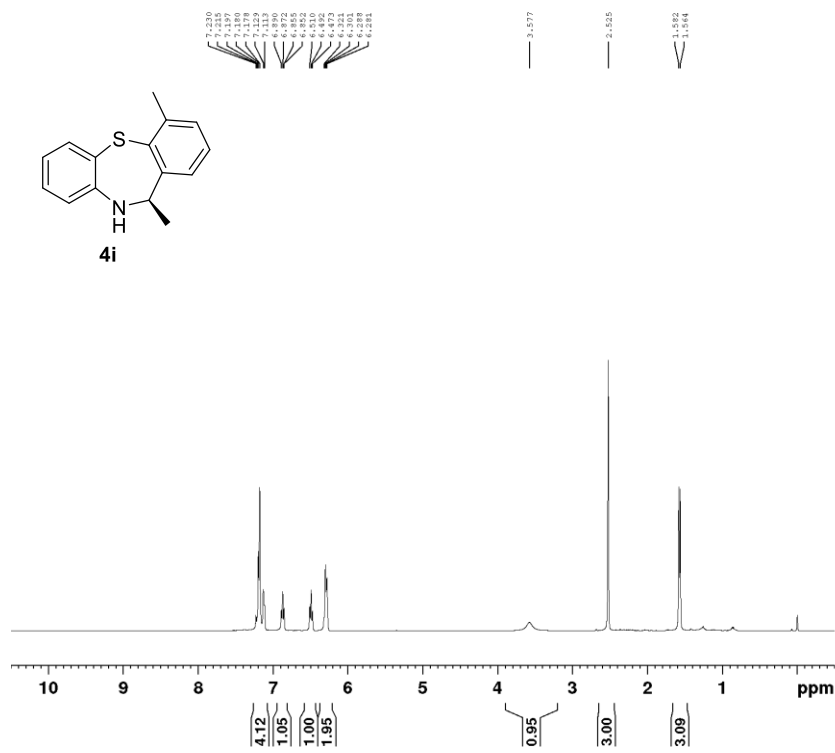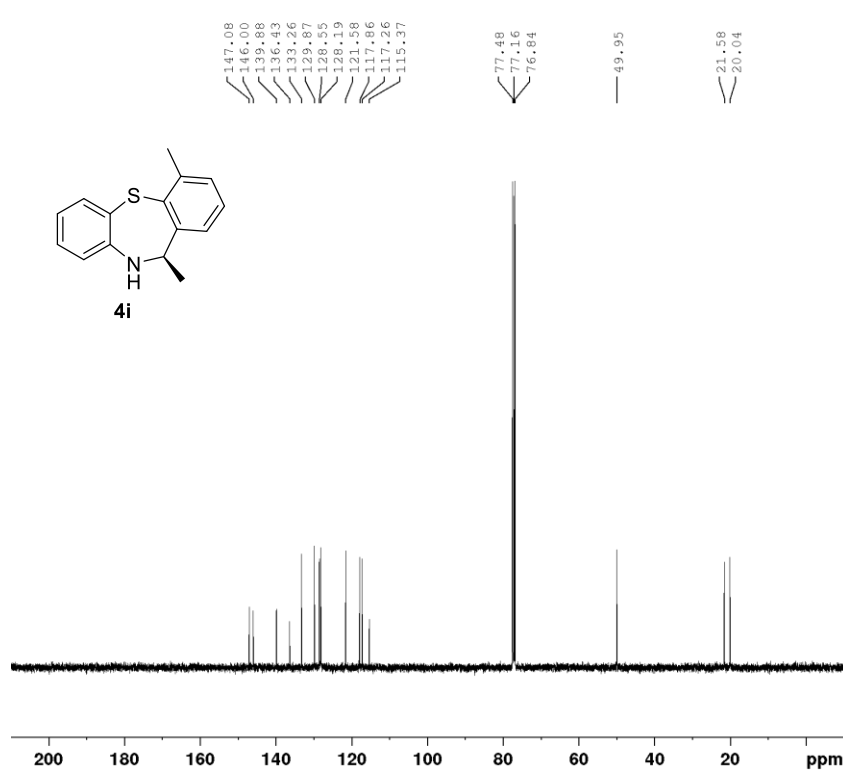

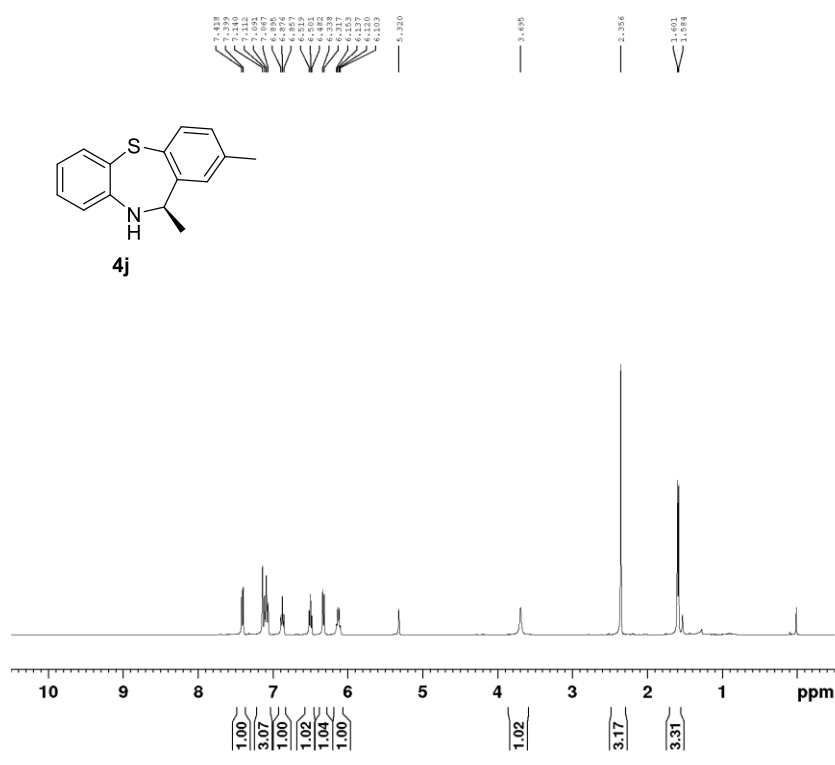

Current Data Parameters  
 NAME 2022-11-08-YZQ-S-P-Me-Right-QH-Pro  
 EXPNO 1  
 PROCNO 1

F2 - Acquisition Parameters  
 Date\_ 20221109  
 Time 1.51 h  
 INSTRUM spect  
 PROBHD 5 mm PABBO BB/  
 PULPROG zgpg30  
 TD 32768  
 SOLVENT CD2Cl2  
 NS 16  
 DS 0  
 SWH 8012.820 Hz  
 FIDRES 0.489064 Hz  
 AQ 2.0447233 sec  
 RG 206.33  
 DW 62.400 usec  
 DE 6.50 usec  
 TE 299.2 K  
 D1 2.00000000 sec  
 TDO 1  
 SFO1 400.2424716 MHz  
 NUC1 1H  
 P1 14.30 usec  
 PL1 12.0000000 W

F2 - Processing parameters  
 SI 65536  
 SF 400.2400155 MHz  
 MDW EM  
 SSB 0  
 LB 0.30 Hz  
 GB 0  
 PC 1.00

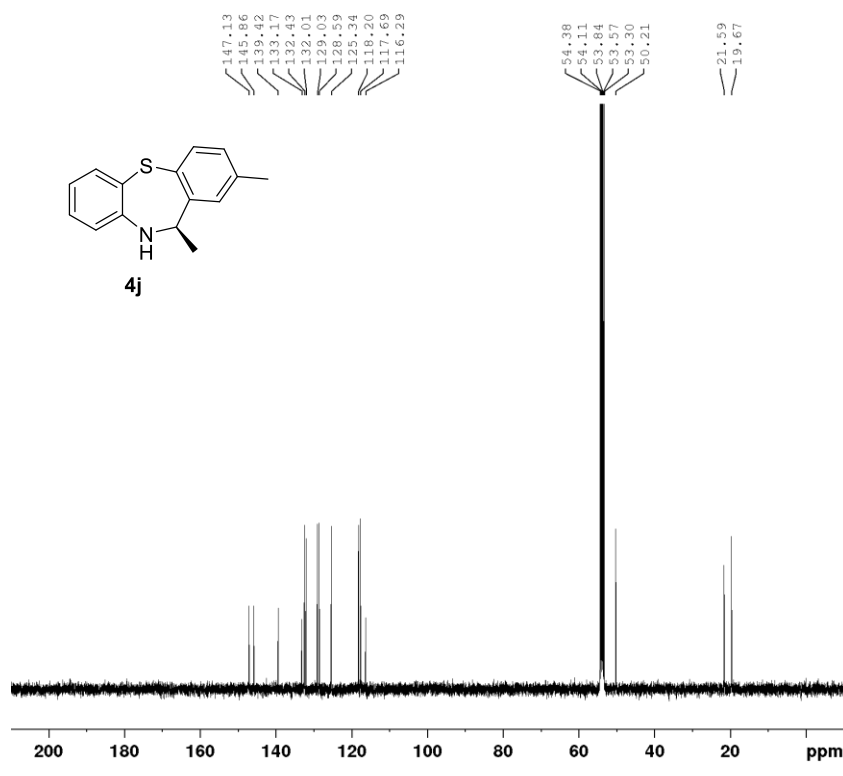

Current Data Parameters  
 NAME 2022-11-08-YZQ-S-P-Me-Right-QH-Pro  
 EXPNO 2  
 PROCNO 1

F2 - Acquisition Parameters  
 Date\_ 20221109  
 Time 2.50 h  
 INSTRUM spect  
 PROBHD 5 mm PABBO BB/  
 PULPROG zgpg30  
 TD 65536  
 SOLVENT CD2Cl2  
 NS 1024  
 DS 4  
 SWH 24038.461 Hz  
 FIDRES 0.733596 Hz  
 AQ 1.3631488 sec  
 RG 206.33  
 DW 20.800 usec  
 DE 6.50 usec  
 TE 299.2 K  
 D1 2.00000000 sec  
 d11 0.03000000 sec  
 DELTA 1.89999998 sec  
 TDO 1  
 SFO1 100.6504916 MHz  
 NUC1 13C  
 F1 10.00 usec  
 PL1 54.0000000 W  
 SFO2 400.2416010 MHz  
 NUC2 1H  
 SFO2 400.2416010 MHz  
 FCD2 90.00 usec  
 PLM2 12.00000000 W  
 PLM12 0.8922489 W  
 PLM13 0.24539000 W

F2 - Processing parameters  
 SI 65536  
 SF 100.6403860 MHz  
 MDW EM  
 SSB 0  
 LB 1.00 Hz  
 GB 0  
 PC 1.40



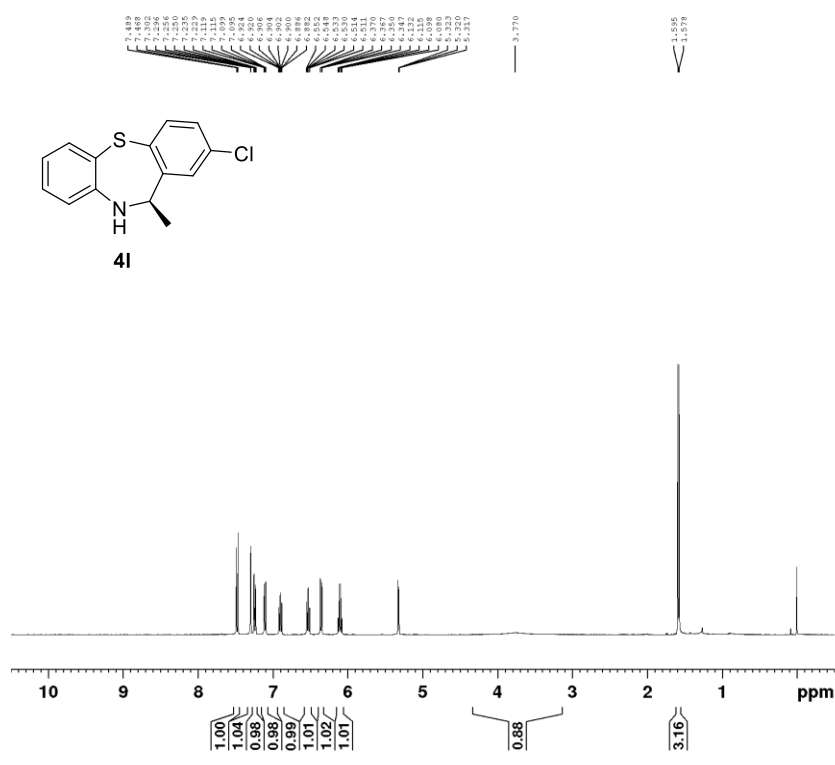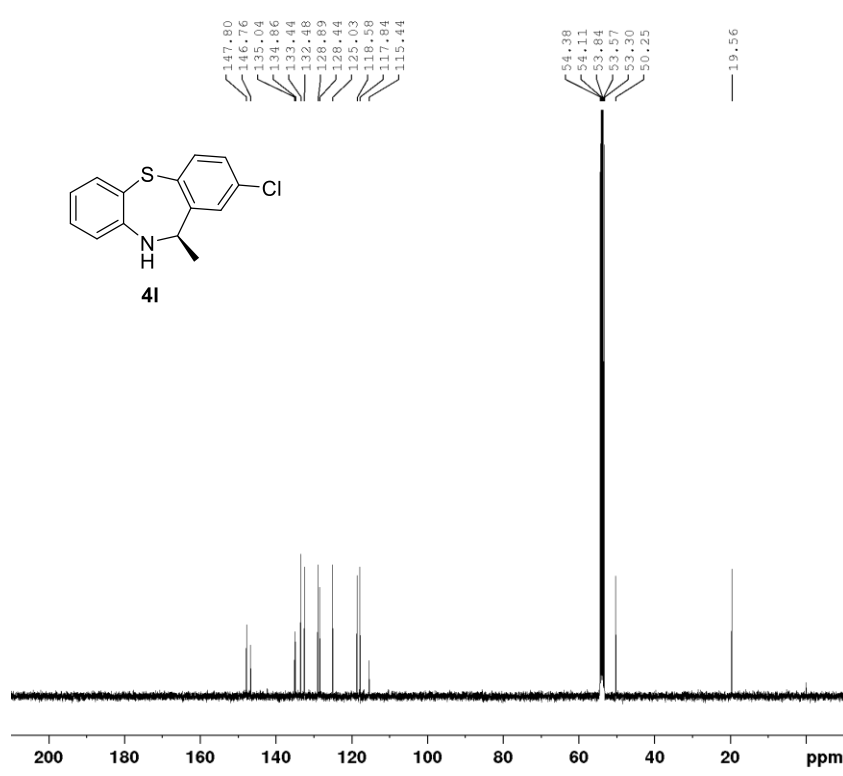

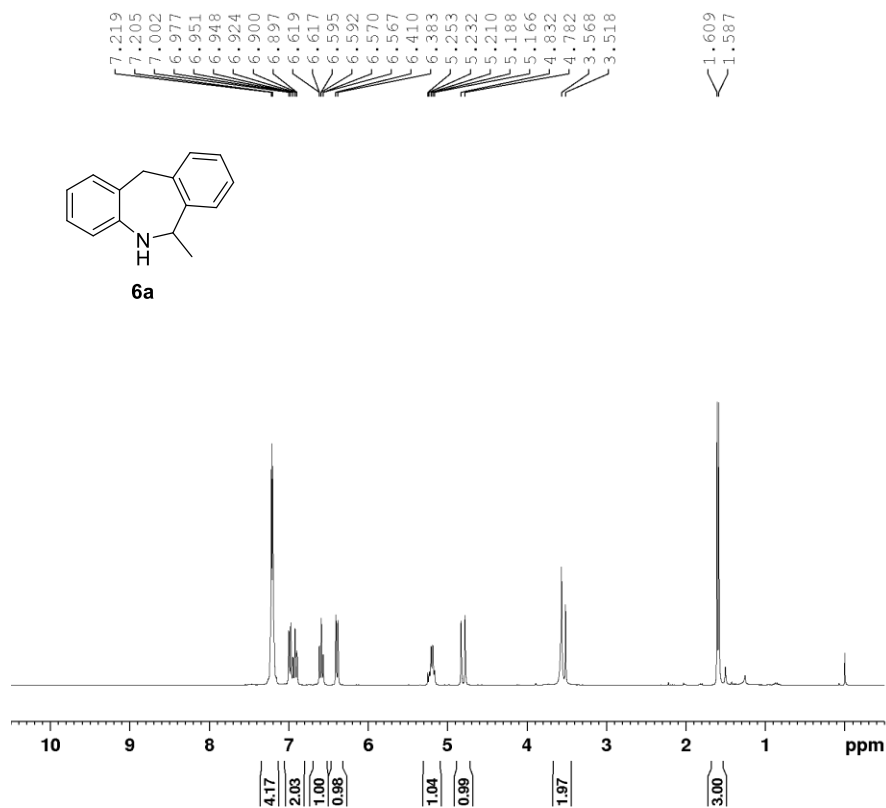

Current Data Parameters  
NAME 500M  
EXPNO 131  
PROCNO 1

F2 - Acquisition Parameters  
Date\_ 20210727  
Time 17.10 h  
INSTRUM spect  
PROBHD 5 mm DUL 13C-1  
PULPROG zg30  
TD 65536  
SOLVENT CDCl3  
NS 16  
DS 2  
SWH 6009.615 Hz  
FIDRES 0.183399 Hz  
AQ 5.4525952 sec  
RG 185.23  
DW 83.200 usec  
DE 6.50 usec  
TE 301.6 K  
D1 1.00000000 sec  
TD0 1  
SFO1 300.1318534 MHz  
NUC1 1H  
P1 8.00 usec  
PLW1 18.00000000 W

F2 - Processing parameters  
SI 65536  
SF 300.1300211 MHz  
WDW EM  
SSB 0  
LB 0.30 Hz  
GB 0  
PC 1.00

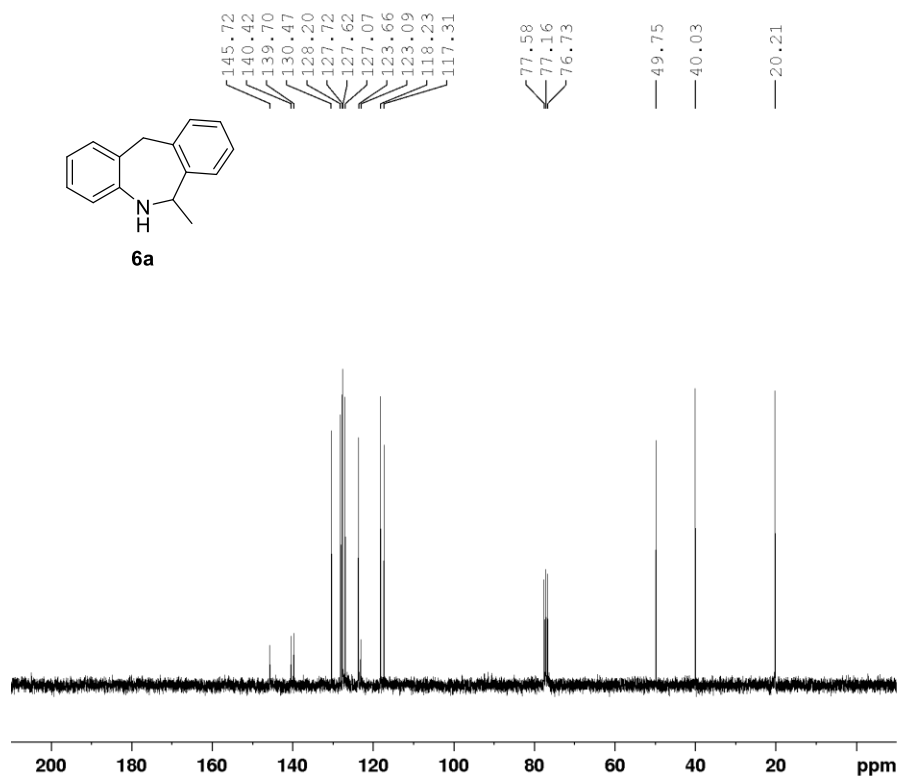

Current Data Parameters  
NAME 500M  
EXPNO 132  
PROCNO 1

F2 - Acquisition Parameters  
Date\_ 20210727  
Time 17.13 h  
INSTRUM spect  
PROBHD 5 mm DUL 13C-1  
PULPROG zgpg30  
TD 65536  
SOLVENT CDCl3  
NS 63  
DS 4  
SWH 18028.846 Hz  
FIDRES 0.550197 Hz  
AQ 1.8175317 sec  
RG 209.09  
DW 27.733 usec  
DE 6.50 usec  
TE 301.7 K  
D1 2.00000000 sec  
d11 0.03000000 sec  
DELTA 1.89999998 sec  
TD0 1  
SFO1 75.4752949 MHz  
NUC1 13C  
P1 11.00 usec  
PLW1 195.0000000 W  
SFO2 300.1312005 MHz  
NUC2 1H  
CPDPRG[2] waltz16  
PCPD2 90.00 usec  
PLW2 14.00000000 W  
PLW12 0.17284000 W  
PLW13 0.14000000 W

F2 - Processing parameters  
SI 32768  
SF 75.4677420 MHz  
WDW EM  
SSB 0  
LB 1.00 Hz  
GB 0  
PC 1.40

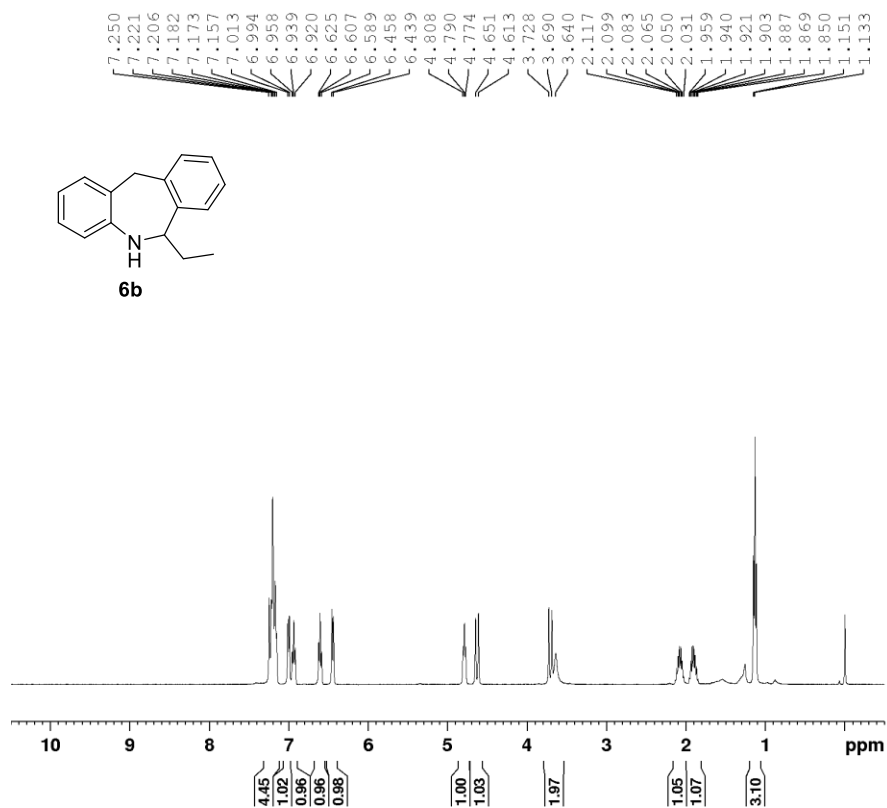

Current Data Parameters  
NAME 500M  
EXPNO 133  
PROCNO 1

F2 - Acquisition Parameters  
Date\_ 20221115  
Time 16.55 h  
INSTRUM spect  
PROBHD 5 mm PABBO BB/  
PULPROG zg30  
TD 32768  
SOLVENT CDCl3  
NS 16  
DS 0  
SWH 8012.820 Hz  
FIDRES 0.489064 Hz  
AQ 2.9447233 sec  
RG 206.33  
DW 62.400 usec  
DE 6.50 usec  
TE 298.0 K  
D1 2.00000000 sec  
D0 1  
SFO1 400.2424716 MHz  
NUC1 1H  
P1 14.30 usec  
PLW1 12.00000000 W

F2 - Processing parameters  
SI 65536  
SF 400.2400139 MHz  
WDW EM  
SSB 0  
LB 0.30 Hz  
GB 0  
PC 1.00

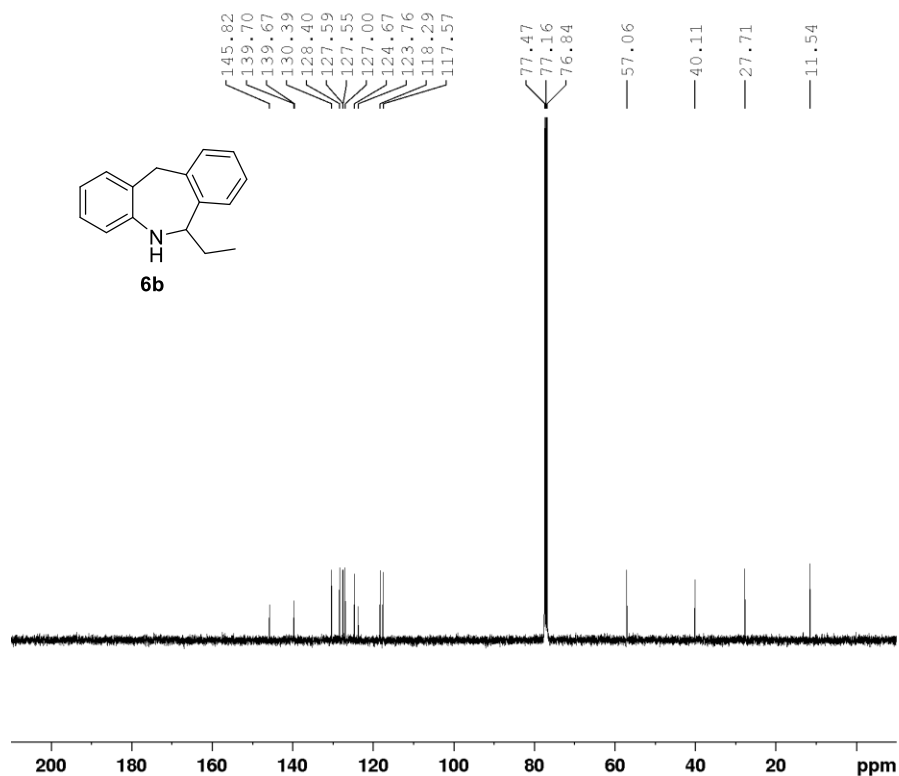

Current Data Parameters  
NAME 500M  
EXPNO 134  
PROCNO 1

F2 - Acquisition Parameters  
Date\_ 20221116  
Time 0.14 h  
INSTRUM spect  
PROBHD 5 mm PABBO BB/  
PULPROG zgpg30  
TD 65536  
SOLVENT CDCl3  
NS 1024  
DS 4  
SWH 24038.461 Hz  
FIDRES 0.733596 Hz  
AQ 1.3631488 sec  
RG 206.33  
DW 20.800 usec  
DE 6.50 usec  
TE 298.0 K  
D1 2.00000000 sec  
d11 0.03000000 sec  
DELTA 1.89999998 sec  
D0 1  
SFO1 100.6504916 MHz  
NUC1 13C  
P1 10.00 usec  
PLW1 54.00000000 W  
SFO2 400.2416010 MHz  
NUC2 1H  
CPDPRG2 waltz16  
PCPD2 90.00 usec  
PLW2 12.00000000 W  
PLW12 0.30294999 W  
PLW13 0.24539000 W

F2 - Processing parameters  
SI 32768  
SF 100.6404149 MHz  
WDW EM  
SSB 0  
LB 1.00 Hz  
GB 0  
PC 1.40



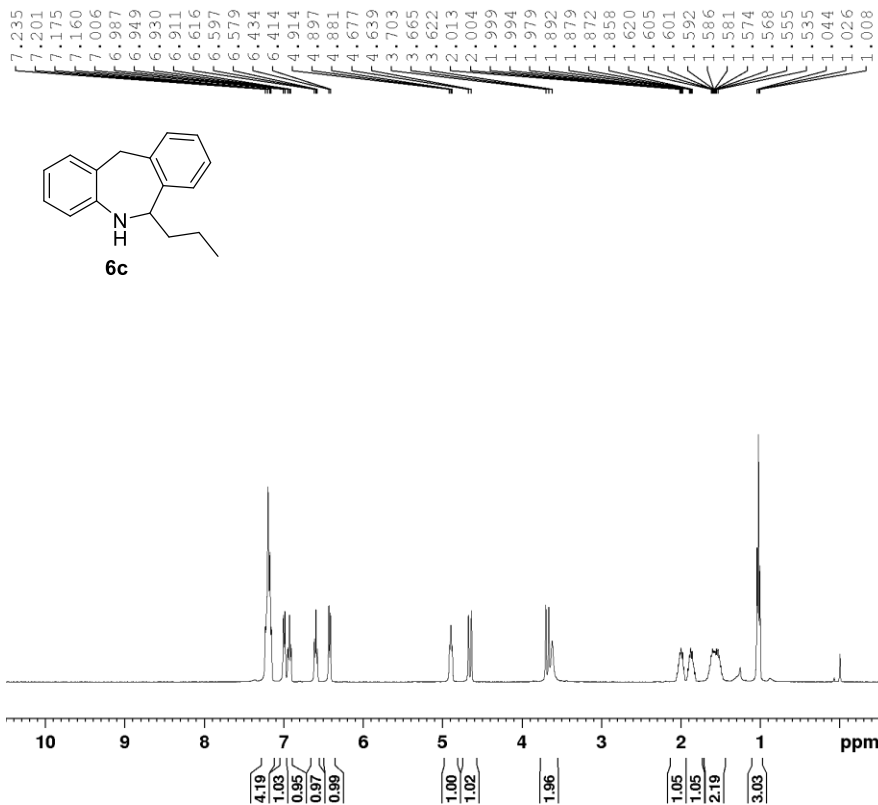

Current Data Parameters  
NAME 500M  
EXPNO 135  
PROCNO 1

F2 - Acquisition Parameters  
Date\_ 20221115  
Time 16.47 h  
INSTRUM spect  
PROBHD 5 mm PABBO BB/  
PULPROG zg30  
TD 32768  
SOLVENT CDCl3  
NS 9  
DS 0  
SWH 8012.820 Hz  
FIDRES 0.489064 Hz  
AQ 2.0447233 sec  
RG 102.73  
DW 62.400 usec  
DE 6.50 usec  
TE 298.0 K  
D1 2.00000000 sec  
TD0 1  
SFO1 400.2424716 MHz  
NUC1 1H  
P1 14.30 usec  
PLW1 12.00000000 W

F2 - Processing parameters  
SI 65536  
SF 400.2400201 MHz  
WDW EM  
SSB 0  
LB 0.30 Hz  
GB 0  
PC 1.00

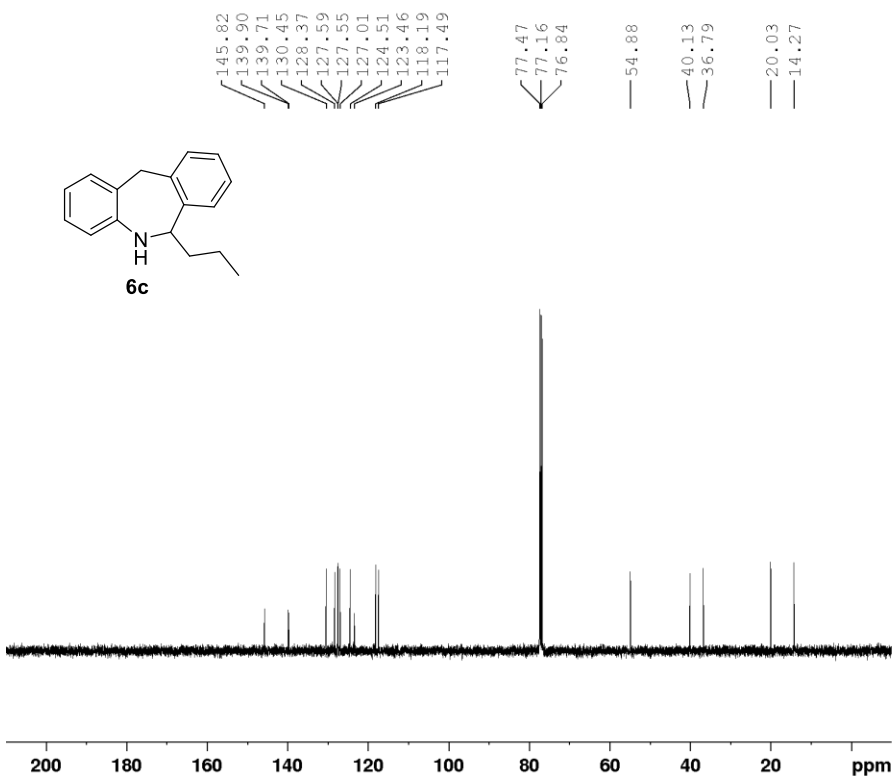

Current Data Parameters  
NAME 500M  
EXPNO 136  
PROCNO 1

F2 - Acquisition Parameters  
Date\_ 20221115  
Time 16.49 h  
INSTRUM spect  
PROBHD 5 mm PABBO BB/  
PULPROG zgpg30  
TD 65536  
SOLVENT CDCl3  
NS 65  
DS 4  
SWH 24038.461 Hz  
FIDRES 0.733596 Hz  
AQ 1.3631488 sec  
RG 206.33  
DW 20.800 usec  
DE 6.50 usec  
TE 298.1 K  
D1 2.00000000 sec  
d11 0.03000000 sec  
DELTA 1.89999998 sec  
TD0 1  
SFO1 100.6504916 MHz  
NUC1 13C  
P1 10.00 usec  
PLW1 54.00000000 W  
SFO2 400.2416010 MHz  
NUC2 1H  
CPDPRG[2] waltz16  
PCPD2 90.00 usec  
PLW2 12.00000000 W  
PLW12 0.30294999 W  
PLW13 0.24539000 W

F2 - Processing parameters  
SI 32768  
SF 100.6404172 MHz  
WDW EM  
SSB 0  
LB 1.00 Hz  
GB 0  
PC 1.40

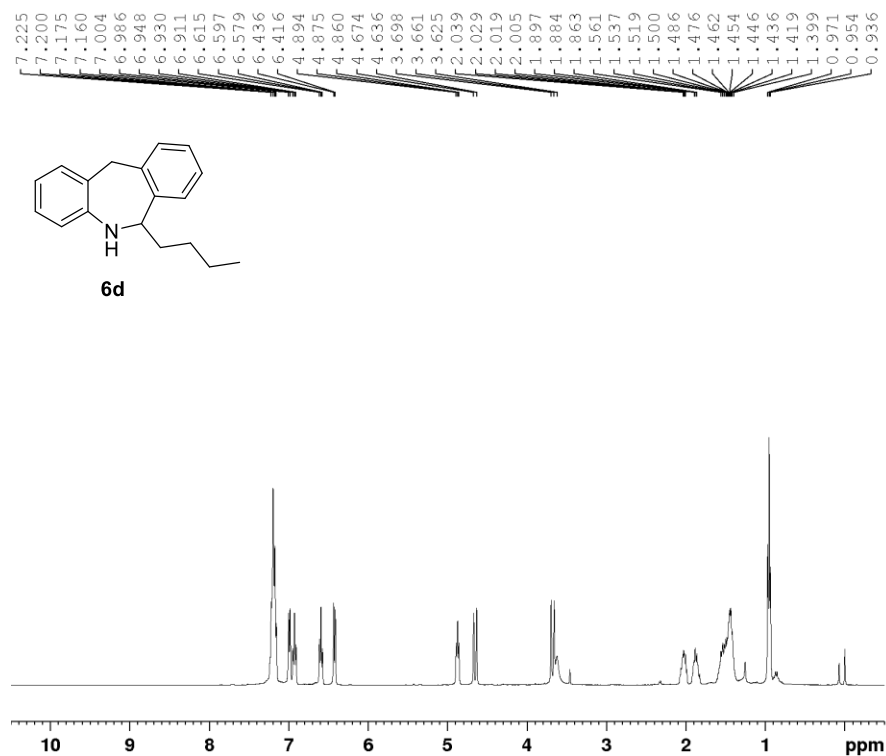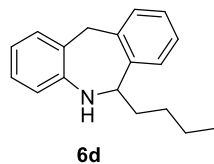

Current Data Parameters  
 NAME 500M  
 EXPNO 137  
 PROCNO 1

F2 - Acquisition Parameters  
 Date\_ 20221029  
 Time 20.18 h  
 INSTRUM spect  
 PROBHD 5 mm PABBO BB/  
 PULPROG zg30  
 TD 32768  
 SOLVENT CDCl3  
 NS 16  
 DS 0  
 SWH 8012.820 Hz  
 FIDRES 0.489064 Hz  
 AQ 2.0447233 sec  
 RG 80.72  
 DW 62.400 usec  
 DE 6.50 usec  
 TE 298.0 K  
 D1 2.00000000 sec  
 TDO 1  
 SFO1 400.2424716 MHz  
 NUC1 1H  
 P1 14.30 usec  
 PLW1 12.00000000 W

F2 - Processing parameters  
 SI 65536  
 SF 400.2400235 MHz  
 WDW EM  
 SSB 0  
 LB 0.30 Hz  
 GB 0  
 PC 1.00

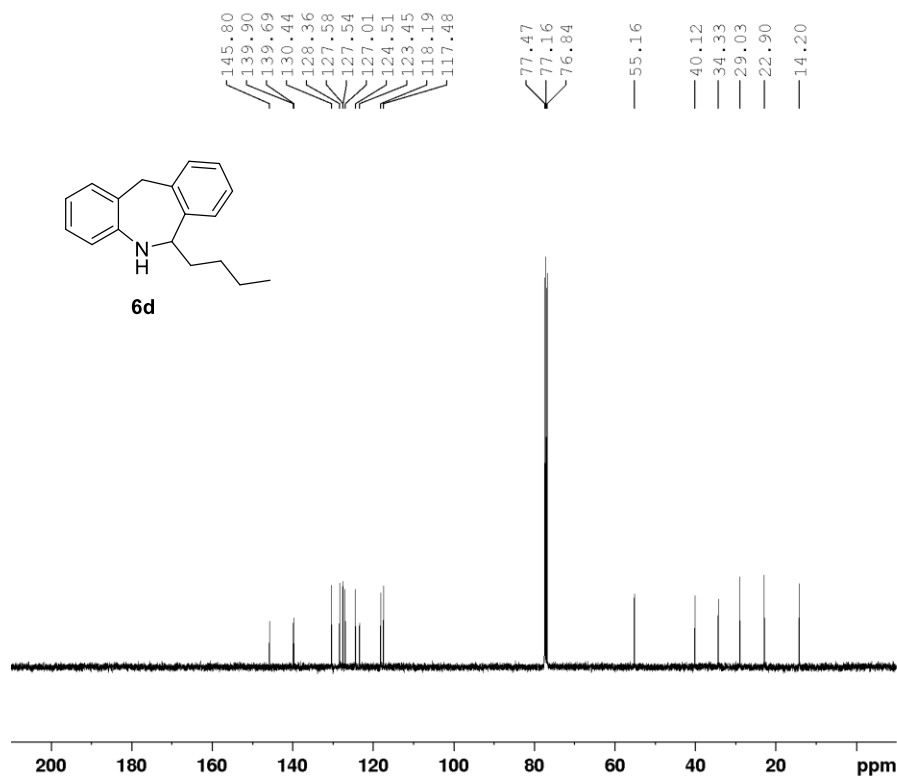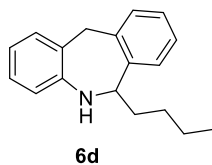

Current Data Parameters  
 NAME 500M  
 EXPNO 138  
 PROCNO 1

F2 - Acquisition Parameters  
 Date\_ 20221029  
 Time 20.30 h  
 INSTRUM spect  
 PROBHD 5 mm PABBO BB/  
 PULPROG zgpg30  
 TD 65536  
 SOLVENT CDCl3  
 NS 200  
 DS 4  
 SWH 24038.461 Hz  
 FIDRES 0.733596 Hz  
 AQ 1.3631488 sec  
 RG 206.33  
 DW 20.800 usec  
 DE 6.50 usec  
 TE 298.0 K  
 D1 2.00000000 sec  
 d11 0.03000000 sec  
 DELTA 1.89999998 sec  
 TDO 1  
 SFO1 100.6504916 MHz  
 NUC1 13C  
 P1 10.00 usec  
 PLW1 54.00000000 W  
 SFO2 400.2416010 MHz  
 NUC2 1H  
 CPDPRG2 waltz16  
 PCPD2 90.00 usec  
 PLW2 12.00000000 W  
 PLW12 0.30294999 W  
 PLW13 0.24539000 W

F2 - Processing parameters  
 SI 32768  
 SF 100.6404190 MHz  
 WDW EM  
 SSB 0  
 LB 1.00 Hz  
 GB 0  
 PC 1.40

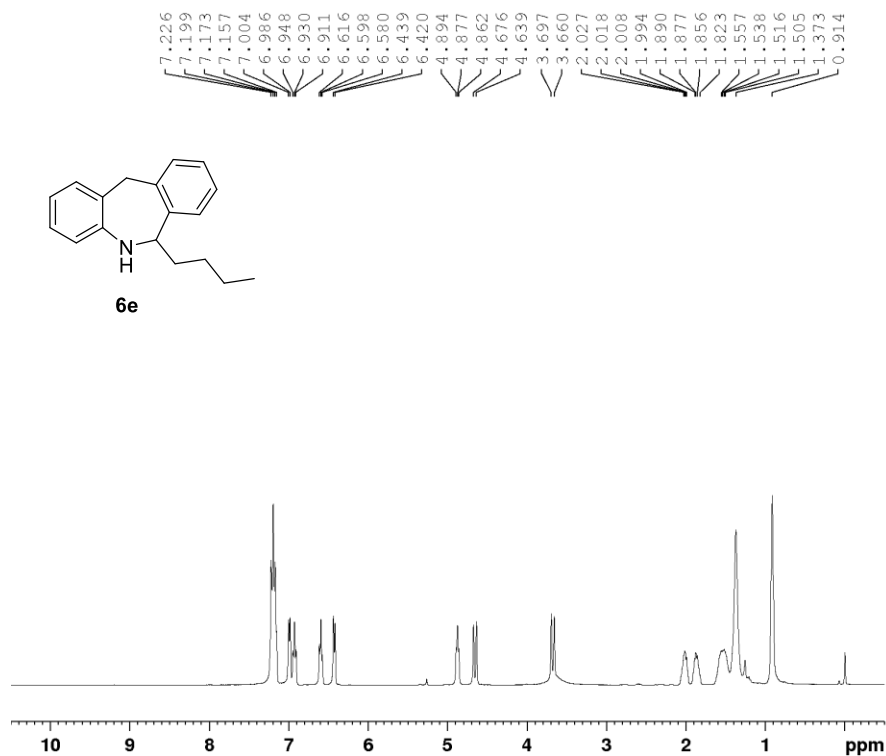

Current Data Parameters  
 NAME 500M  
 EXPNO 143  
 PROCNO 1

F2 - Acquisition Parameters  
 Date\_ 20230209  
 Time 1.38 h  
 INSTRUM spect  
 PROBHD 5 mm PABBO BB/  
 PULPROG zgpg30  
 TD 32768  
 SOLVENT CDCl3  
 NS 16  
 DS 0  
 SWH 8012.820 Hz  
 FIDRES 0.489064 Hz  
 AQ 2.0447233 sec  
 RG 73.9  
 DW 62.400 usec  
 DE 6.50 usec  
 TE 298.0 K  
 D1 2.00000000 sec  
 TD0 4  
 SFO1 400.2424716 MHz  
 NUC1 1H  
 P1 14.30 usec  
 PLW1 12.00000000 W

F2 - Processing parameters  
 SI 65536  
 SF 400.2400233 MHz  
 WDW EM  
 SSB 0  
 LB 0.30 Hz  
 GB 0  
 PC 1.00

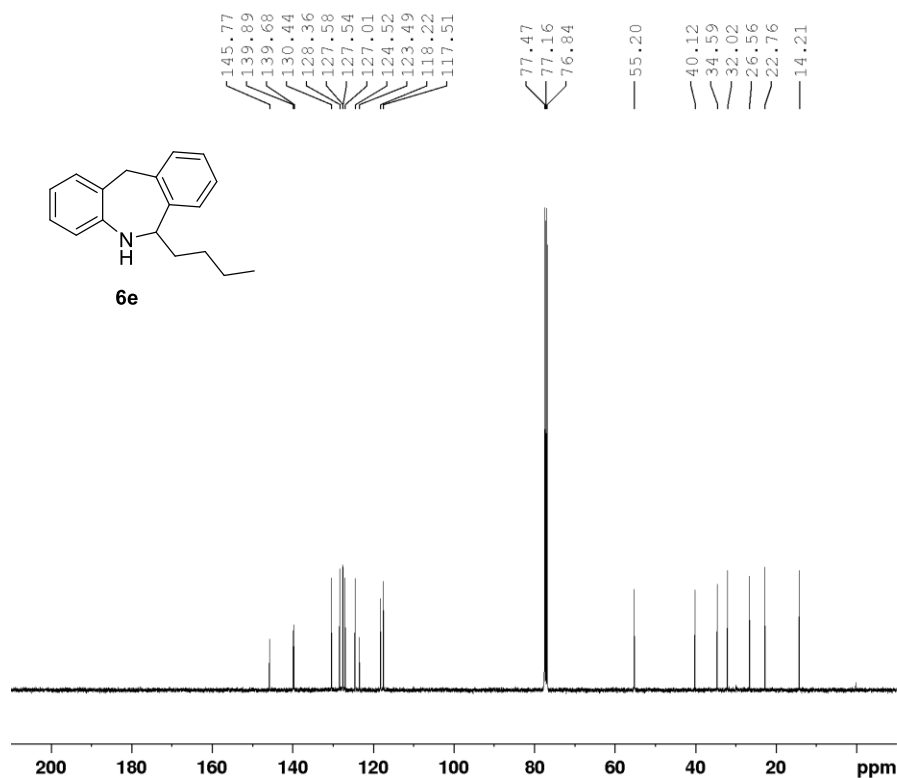

Current Data Parameters  
 NAME 500M  
 EXPNO 144  
 PROCNO 1

F2 - Acquisition Parameters  
 Date\_ 20230209  
 Time 2.37 h  
 INSTRUM spect  
 PROBHD 5 mm PABBO BB/  
 PULPROG zgpg30  
 TD 65536  
 SOLVENT CDCl3  
 NS 1024  
 DS 4  
 SWH 24038.461 Hz  
 FIDRES 0.733596 Hz  
 AQ 1.3631488 sec  
 RG 206.33  
 DW 20.800 usec  
 DE 6.50 usec  
 TE 298.0 K  
 D1 2.00000000 sec  
 d11 0.03000000 sec  
 DELTA 1.89999998 sec  
 TD0 1  
 SFO1 100.6504916 MHz  
 NUC1 13C  
 P1 10.00 usec  
 PLW1 54.00000000 W  
 SFO2 400.2416010 MHz  
 NUC2 1H  
 CPDPRG[2] waltz16  
 PCPD2 90.00 usec  
 PLW2 12.00000000 W  
 PLW12 0.30294999 W  
 PLW13 0.24539000 W

F2 - Processing parameters  
 SI 32768  
 SF 100.6404186 MHz  
 WDW EM  
 SSB 0  
 LB 1.00 Hz  
 GB 0  
 PC 1.40

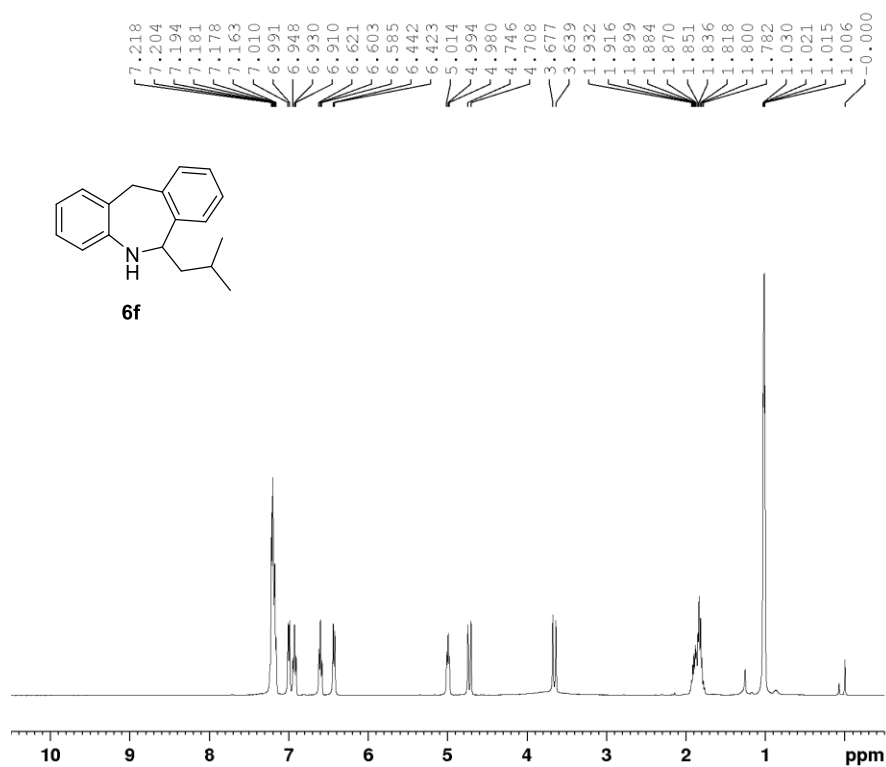

Current Data Parameters  
NAME 500M  
EXPNO 147  
PROCNO 1

F2 - Acquisition Parameters  
Date\_ 20230222  
Time 2.33 h  
INSTRUM spect  
PROBHD 5 mm PABBO BB/  
PULPROG zg30  
TD 32768  
SOLVENT CDC13  
NS 16  
DS 0  
SWH 8012.820 Hz  
FIDRES 0.489064 Hz  
AQ 2.0447233 sec  
RG 80.72  
DW 62.400 usec  
DE 6.50 usec  
TE 298.0 K  
D1 2.0000000 sec  
TD0 1  
SFO1 400.2424716 MHz  
NUC1 1H  
P1 14.30 usec  
PLW1 12.0000000 W

F2 - Processing parameters  
SI 65536  
SF 400.2400265 MHz  
WDW EM  
SSB 0  
LB 0.30 Hz  
GB 0  
PC 1.00

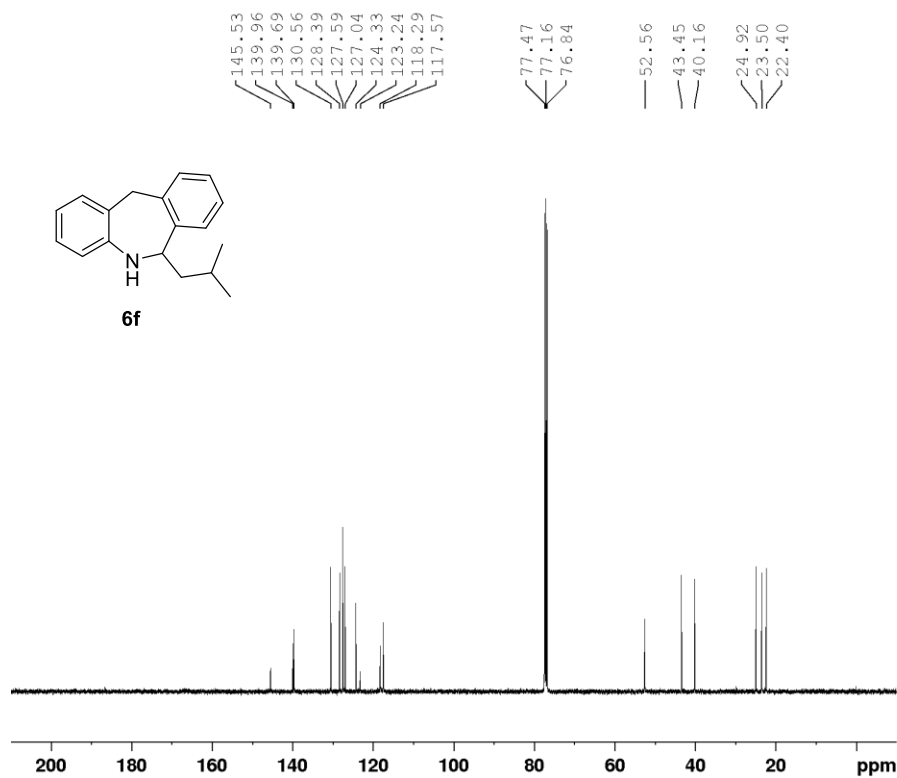

Current Data Parameters  
NAME 500M  
EXPNO 148  
PROCNO 1

F2 - Acquisition Parameters  
Date\_ 20230222  
Time 3.32 h  
INSTRUM spect  
PROBHD 5 mm PABBO BB/  
PULPROG zgpg30  
TD 65536  
SOLVENT CDC13  
NS 1024  
DS 4  
SWH 24038.461 Hz  
FIDRES 0.733596 Hz  
AQ 1.3631488 sec  
RG 206.33  
DW 20.800 usec  
DE 6.50 usec  
TE 298.4 K  
D1 2.0000000 sec  
d11 0.0300000 sec  
DELTA 1.89999998 sec  
TD0 1  
SFO1 100.6504916 MHz  
NUC1 13C  
P1 10.00 usec  
PLW1 54.0000000 W  
SFO2 400.2416010 MHz  
NUC2 1H  
CPDPRG2 waltz16  
PCPD2 90.00 usec  
PLW2 12.0000000 W  
PLW12 0.30294999 W  
PLW13 0.24539000 W

F2 - Processing parameters  
SI 32768  
SF 100.6404198 MHz  
WDW EM  
SSB 0  
LB 1.00 Hz  
GB 0  
PC 1.40

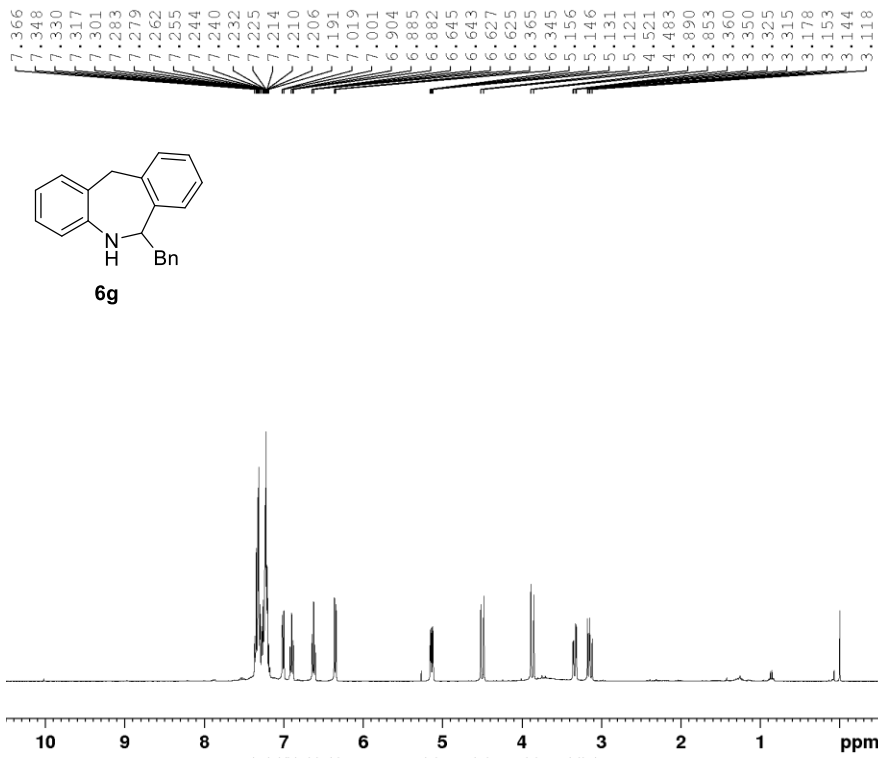

Current Data Parameters  
NAME 500M  
EXPNO 139  
PROCNO 1

F2 - Acquisition Parameters  
Date\_ 20221030  
Time 17.55 h  
INSTRUM spect  
PROBHD 5 mm PABBO BB/  
PULPROG zg30  
TD 32768  
SOLVENT CDC13  
NS 8  
DS 0  
SWH 8012.820 Hz  
FIDRES 0.489064 Hz  
AQ 2.0447233 sec  
RG 162.77  
DW 62.400 usec  
DE 6.50 usec  
TE 298.0 K  
D1 2.0000000 sec  
TD0 1  
SFO1 400.2424716 MHz  
NUC1 1H  
P1 14.30 usec  
PLW1 12.0000000 W

F2 - Processing parameters  
SI 65536  
SF 400.2400211 MHz  
WDW EM  
SSB 0  
LB 0.30 Hz  
GB 0  
PC 1.00

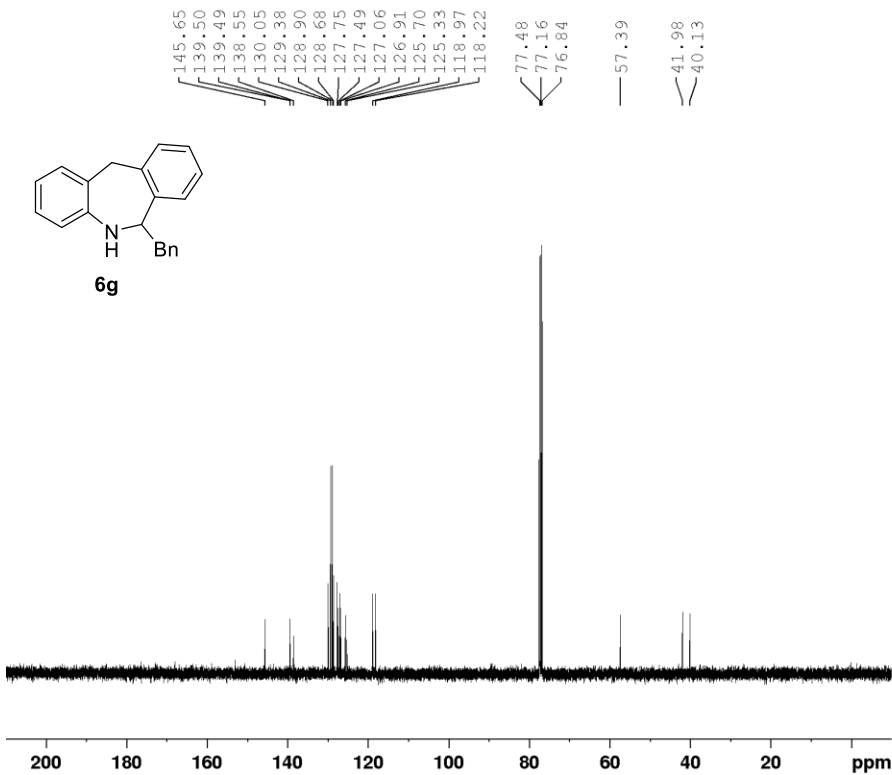

Current Data Parameters  
NAME 500M  
EXPNO 140  
PROCNO 1

F2 - Acquisition Parameters  
Date\_ 20221030  
Time 17.58 h  
INSTRUM spect  
PROBHD 5 mm PABBO BB/  
PULPROG zgpg30  
TD 65536  
SOLVENT CDC13  
NS 128  
DS 4  
SWH 24038.461 Hz  
FIDRES 0.733596 Hz  
AQ 1.3631488 sec  
RG 206.33  
DW 20.800 usec  
DE 6.50 usec  
TE 298.0 K  
D1 2.0000000 sec  
d11 0.0300000 sec  
DELTA 1.89999998 sec  
TD0 1  
SFO1 100.6504916 MHz  
NUC1 13C  
P1 10.00 usec  
PLW1 54.0000000 W  
SFO2 400.2416010 MHz  
NUC2 1H  
CPDPRG[2] waltz16  
PCPD2 90.00 usec  
PLW2 12.0000000 W  
PLW12 0.30294999 W  
PLW13 0.24539000 W

F2 - Processing parameters  
SI 32768  
SF 100.6404177 MHz  
WDW EM  
SSB 0  
LB 0.40 Hz  
GB 0  
PC 1.40

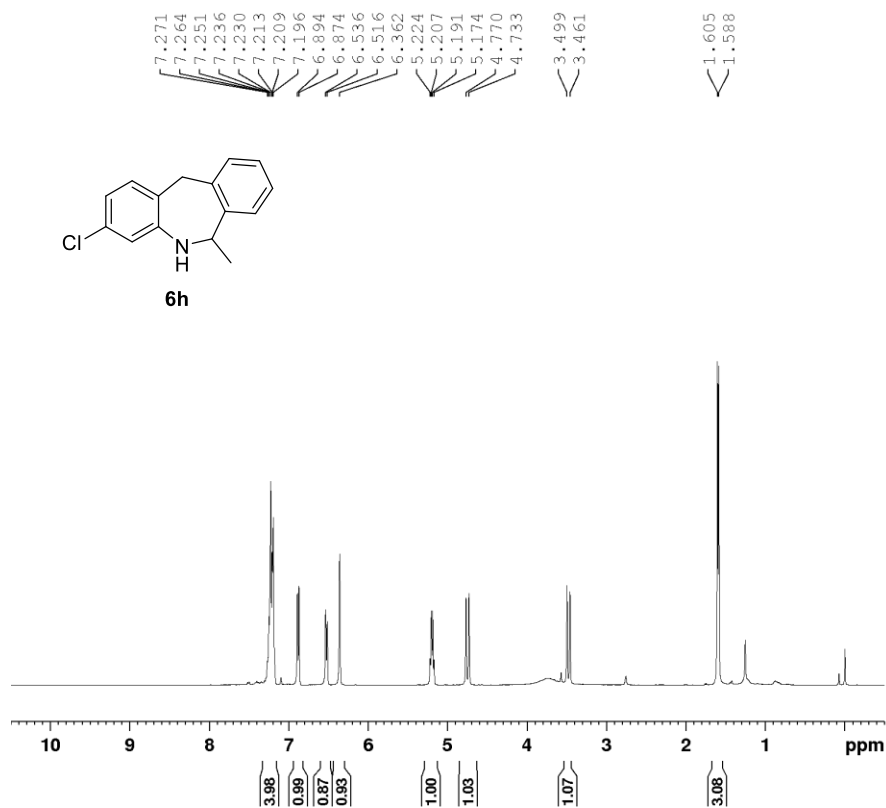

Current Data Parameters  
 NAME 500M  
 EXPNO 159  
 PROCNO 1

F2 - Acquisition Parameters  
 Date\_ 20230223  
 Time 5.04 h  
 INSTRUM spect  
 PROBHD 5 mm PABBO BB/  
 PULPROG zg30  
 TD 32768  
 SOLVENT CDCl3  
 NS 16  
 DS 0  
 SWH 8012.820 Hz  
 FIDRES 0.489064 Hz  
 AQ 2.0447233 sec  
 RG 140.59  
 DW 62.400 usec  
 DE 6.50 usec  
 TE 298.0 K  
 D1 2.00000000 sec  
 TD0 1  
 SFO1 400.2424716 MHz  
 NUC1 1H  
 P1 14.30 usec  
 PLW1 12.00000000 W

F2 - Processing parameters  
 SI 65536  
 SF 400.2400221 MHz  
 WDW EM  
 SSB 0  
 LB 0.30 Hz  
 GB 0  
 PC 1.00

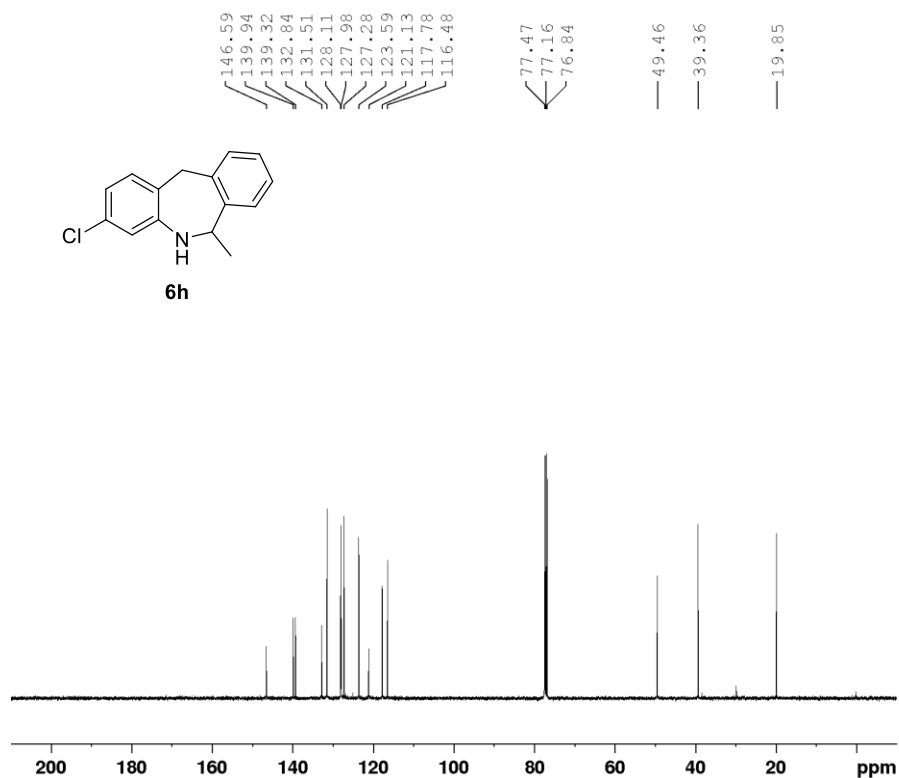

Current Data Parameters  
 NAME 500M  
 EXPNO 160  
 PROCNO 1

F2 - Acquisition Parameters  
 Date\_ 20230223  
 Time 6.03 h  
 INSTRUM spect  
 PROBHD 5 mm PABBO BB/  
 PULPROG zgpg30  
 TD 65536  
 SOLVENT CDCl3  
 NS 1024  
 DS 4  
 SWH 24038.461 Hz  
 FIDRES 0.733596 Hz  
 AQ 1.3631488 sec  
 RG 206.33  
 DW 20.800 usec  
 DE 6.50 usec  
 TE 298.3 K  
 D1 2.00000000 sec  
 d11 0.03000000 sec  
 DELTA 1.89999998 sec  
 TD0 1  
 SFO1 100.6504916 MHz  
 NUC1 13C  
 P1 10.00 usec  
 PLW1 54.00000000 W  
 SFO2 400.2416010 MHz  
 NUC2 1H  
 CPDPRG[2] waltz16  
 PCPD2 90.00 usec  
 PLW2 12.00000000 W  
 PLW12 0.30294999 W  
 PLW13 0.24539000 W

F2 - Processing parameters  
 SI 32768  
 SF 100.6404180 MHz  
 WDW EM  
 SSB 0  
 LB 1.00 Hz  
 GB 0  
 PC 1.40

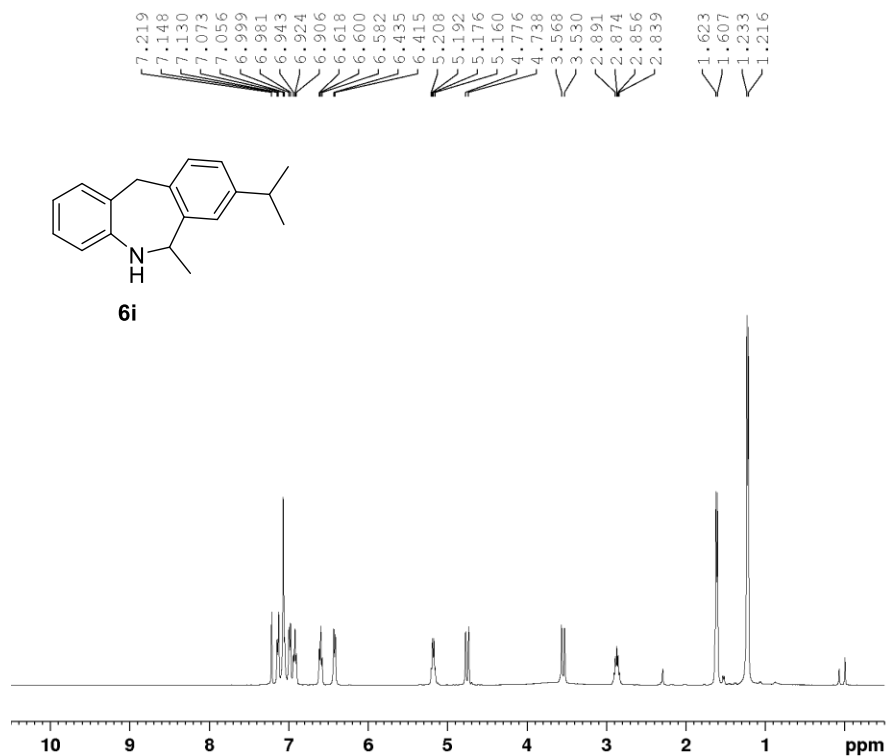

Current Data Parameters  
NAME 500M  
EXPNO 155  
PROCNO 1

F2 - Acquisition Parameters  
Date\_ 20230218  
Time 2.21 h  
INSTRUM spect  
PROBHD 5 mm PABBO BB/  
PULPROG zgpg30  
TD 32768  
SOLVENT CDCl3  
NS 16  
DS 0  
SWH 8012.820 Hz  
FIDRES 0.489064 Hz  
AQ 2.0447233 sec  
RG 80.72  
DW 62.400 usec  
DE 6.50 usec  
TE 296.8 K  
D1 2.00000000 sec  
TD0 1  
SFO1 400.2424716 MHz  
NUC1 1H  
P1 14.30 usec  
PLW1 12.00000000 W

F2 - Processing parameters  
SI 65536  
SF 400.2400264 MHz  
WDW EM  
SSB 0  
LB 0.30 Hz  
GB 0  
PC 1.00

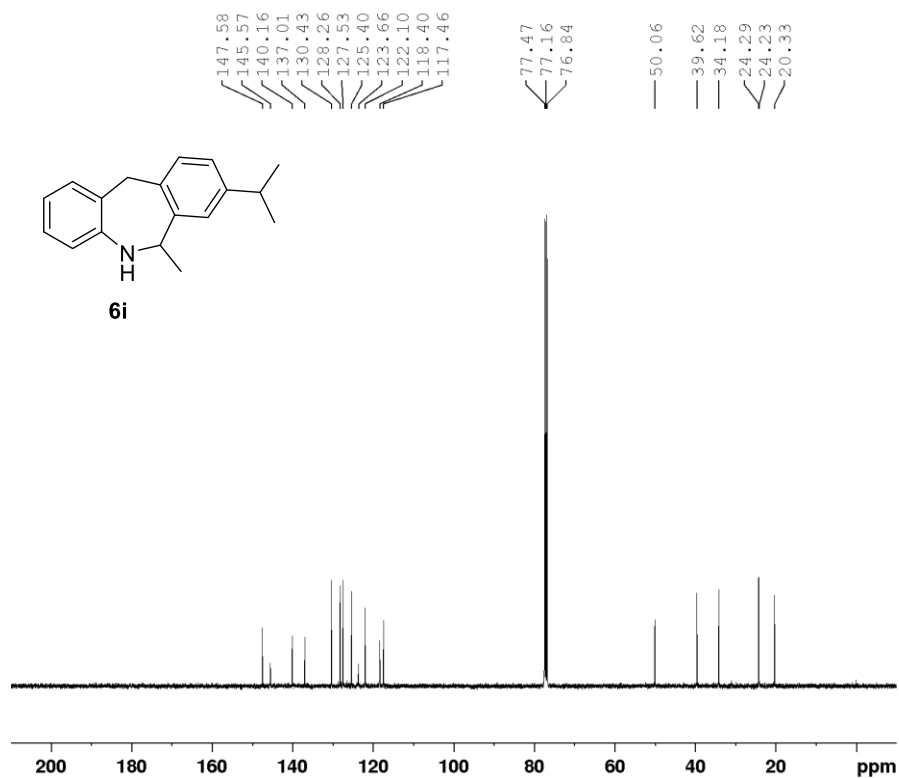

Current Data Parameters  
NAME 500M  
EXPNO 156  
PROCNO 1

F2 - Acquisition Parameters  
Date\_ 20230218  
Time 3.20 h  
INSTRUM spect  
PROBHD 5 mm PABBO BB/  
PULPROG zgpg30  
TD 65536  
SOLVENT CDCl3  
NS 1024  
DS 4  
SWH 24038.461 Hz  
FIDRES 0.733596 Hz  
AQ 1.3631488 sec  
RG 206.33  
DW 20.800 usec  
DE 6.50 usec  
TE 298.0 K  
D1 2.00000000 sec  
d11 0.03000000 sec  
DELTA 1.89999998 sec  
TD0 1  
SFO1 100.6504916 MHz  
NUC1 13C  
P1 10.00 usec  
PLW1 54.00000000 W  
SFO2 400.2416010 MHz  
NUC2 1H  
CPDPRG2 waltz16  
ECPD2 90.00 usec  
PLW2 12.00000000 W  
PLW12 0.30294999 W  
PLW13 0.24539000 W

F2 - Processing parameters  
SI 32768  
SF 100.6404195 MHz  
WDW EM  
SSB 0  
LB 1.00 Hz  
GB 0  
PC 1.40

## 7. Copy of HPLC spectra

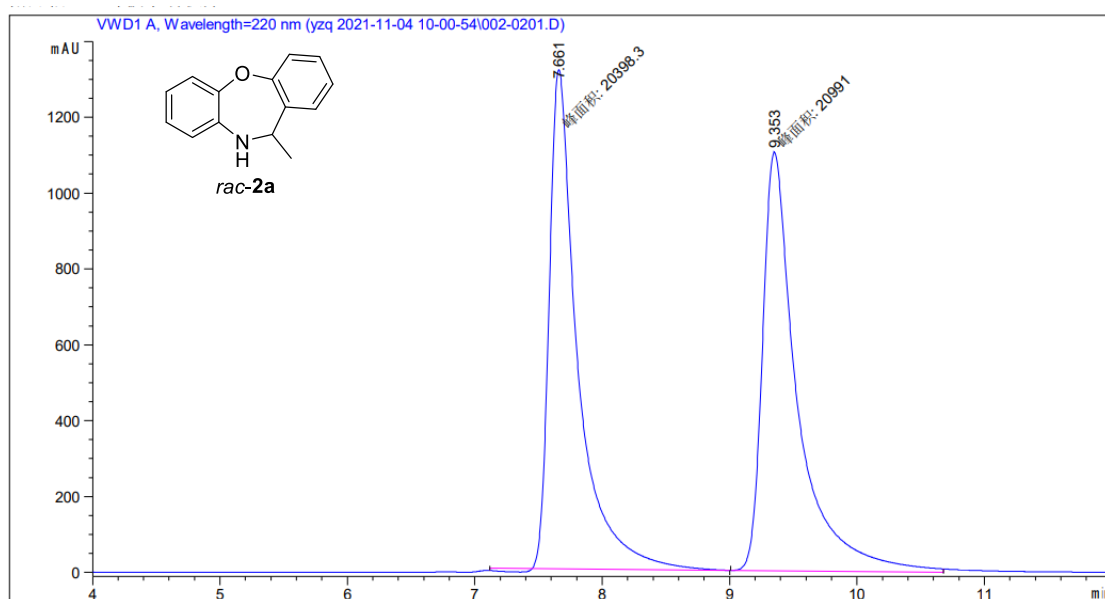

| 峰 # | 保留时间 [min] | 类型 | 峰宽 [min] | 峰面积 [mAU*s] | 峰高 [mAU]   | 峰面积 %   |
|-----|------------|----|----------|-------------|------------|---------|
| 1   | 7.661      | MM | 0.2584   | 2.03983e4   | 1315.81738 | 49.2839 |
| 2   | 9.353      | MM | 0.3169   | 2.09910e4   | 1104.11499 | 50.7161 |

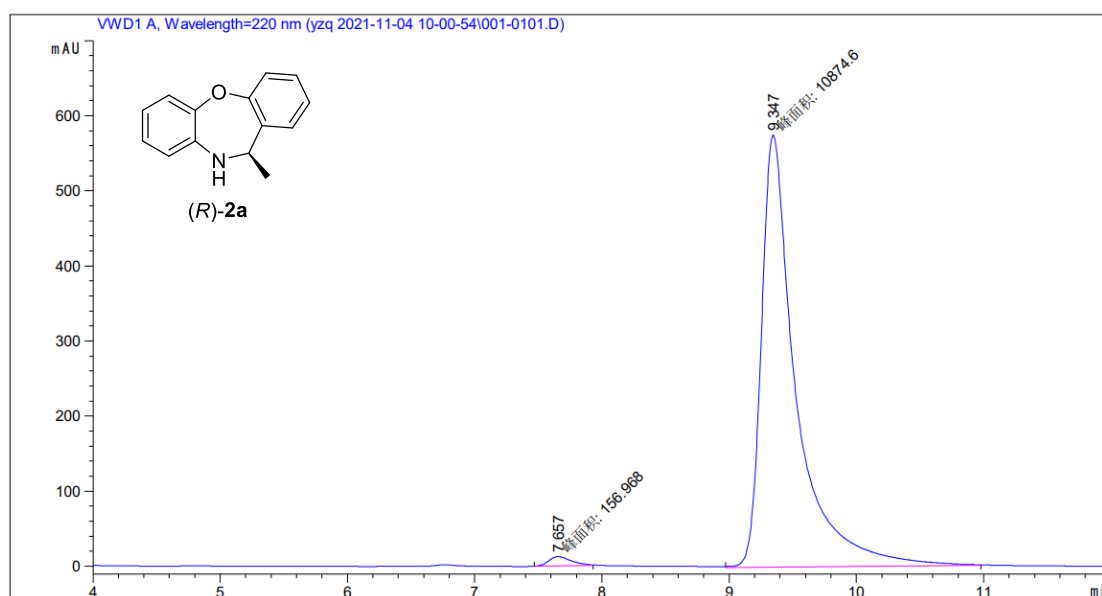

| 峰 # | 保留时间 [min] | 类型 | 峰宽 [min] | 峰面积 [mAU*s] | 峰高 [mAU]  | 峰面积 %   |
|-----|------------|----|----------|-------------|-----------|---------|
| 1   | 7.657      | MM | 0.2086   | 156.96762   | 12.54206  | 1.4229  |
| 2   | 9.347      | MM | 0.3151   | 1.08746e4   | 575.18481 | 98.5771 |



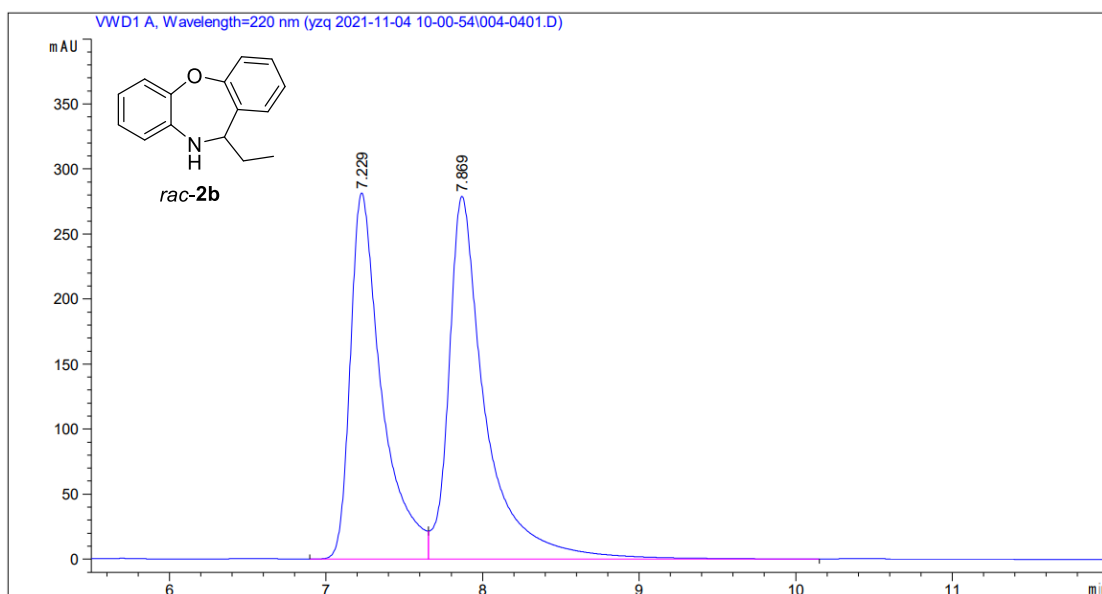

| 峰 # | 保留时间 [min] | 类型 | 峰宽 [min] | 峰面积 [mAU*s] | 峰高 [mAU]  | 峰面积 %   |
|-----|------------|----|----------|-------------|-----------|---------|
| 1   | 7.229      | BV | 0.2027   | 3923.12793  | 281.36957 | 46.3995 |
| 2   | 7.869      | VB | 0.2316   | 4531.97461  | 278.86414 | 53.6005 |

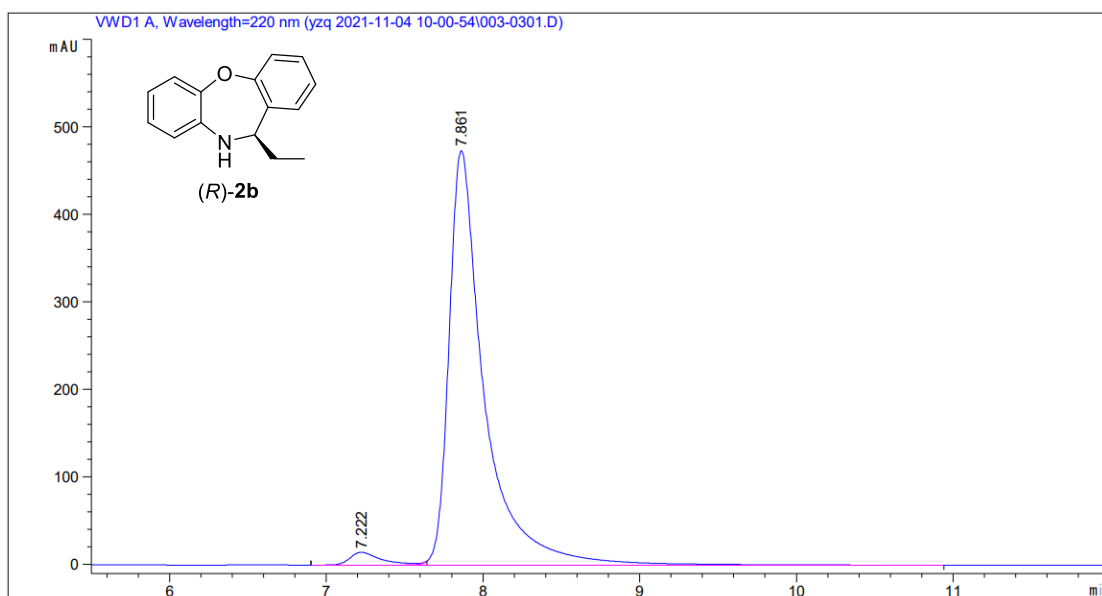

| 峰 # | 保留时间 [min] | 类型   | 峰宽 [min] | 峰面积 [mAU*s] | 峰高 [mAU]  | 峰面积 %   |
|-----|------------|------|----------|-------------|-----------|---------|
| 1   | 7.222      | BV E | 0.2013   | 201.87910   | 14.60347  | 2.6407  |
| 2   | 7.861      | VB R | 0.2264   | 7443.03809  | 473.38141 | 97.3593 |

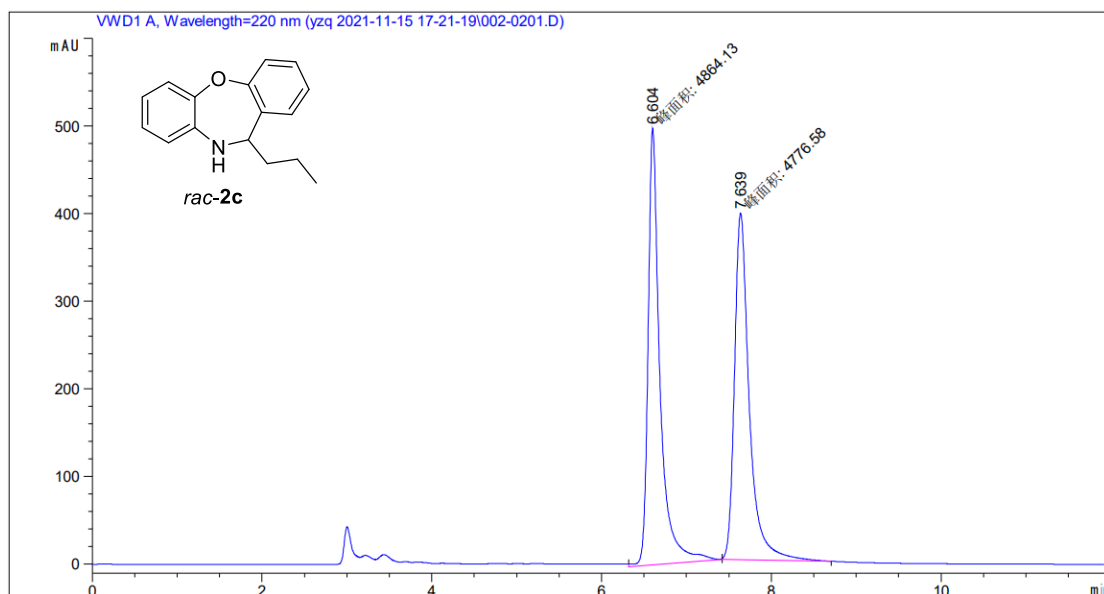

| 峰 # | 保留时间 [min] | 类型 | 峰宽 [min] | 峰面积 [mAU*s] | 峰高 [mAU]  | 峰面积 %   |
|-----|------------|----|----------|-------------|-----------|---------|
| 1   | 6.604      | MM | 0.1627   | 4864.12891  | 498.13934 | 50.4540 |
| 2   | 7.639      | MM | 0.2014   | 4776.58398  | 395.33887 | 49.5460 |

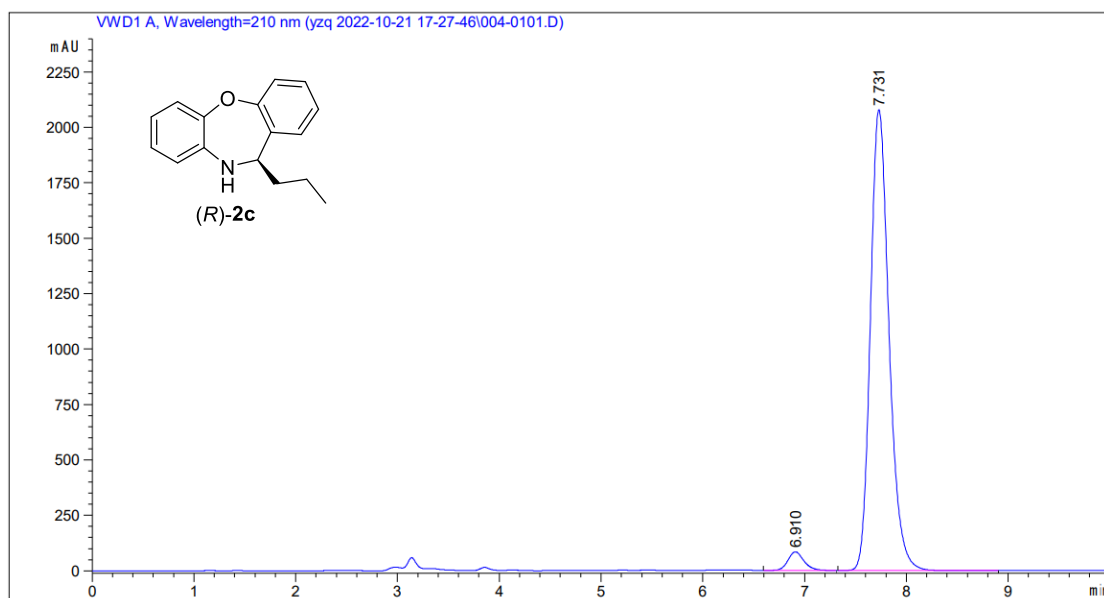

| 峰 # | 保留时间 [min] | 类型 | 峰宽 [min] | 峰面积 [mAU*s] | 峰高 [mAU]   | 峰面积 %   |
|-----|------------|----|----------|-------------|------------|---------|
| 1   | 6.910      | BB | 0.1654   | 903.76801   | 83.44752   | 3.3162  |
| 2   | 7.731      | BB | 0.1949   | 2.63490e4   | 2078.16821 | 96.6838 |

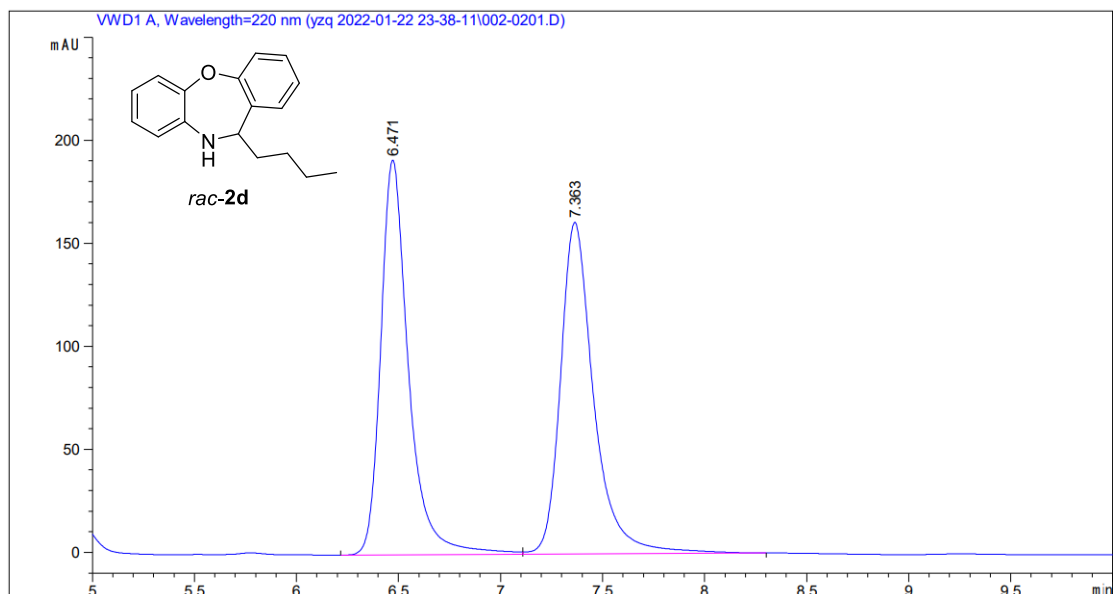

| 峰 # | 保留时间 [min] | 类型 | 峰宽 [min] | 峰面积 [mAU*s] | 峰高 [mAU]  | 峰面积 %   |
|-----|------------|----|----------|-------------|-----------|---------|
| 1   | 6.471      | BV | 0.1417   | 1818.55579  | 191.59535 | 49.8358 |
| 2   | 7.363      | VB | 0.1697   | 1830.53894  | 160.92191 | 50.1642 |

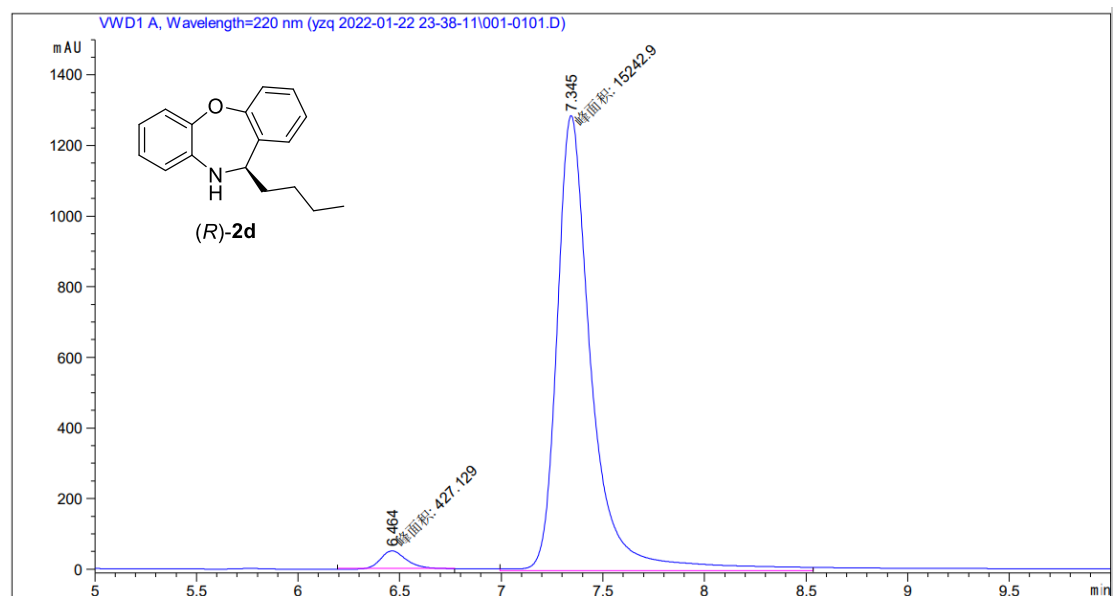

| 峰 # | 保留时间 [min] | 类型 | 峰宽 [min] | 峰面积 [mAU*s] | 峰高 [mAU]   | 峰面积 %   |
|-----|------------|----|----------|-------------|------------|---------|
| 1   | 6.464      | MM | 0.1429   | 427.12881   | 49.81016   | 2.7258  |
| 2   | 7.345      | MM | 0.1971   | 1.52429e4   | 1289.13086 | 97.2742 |

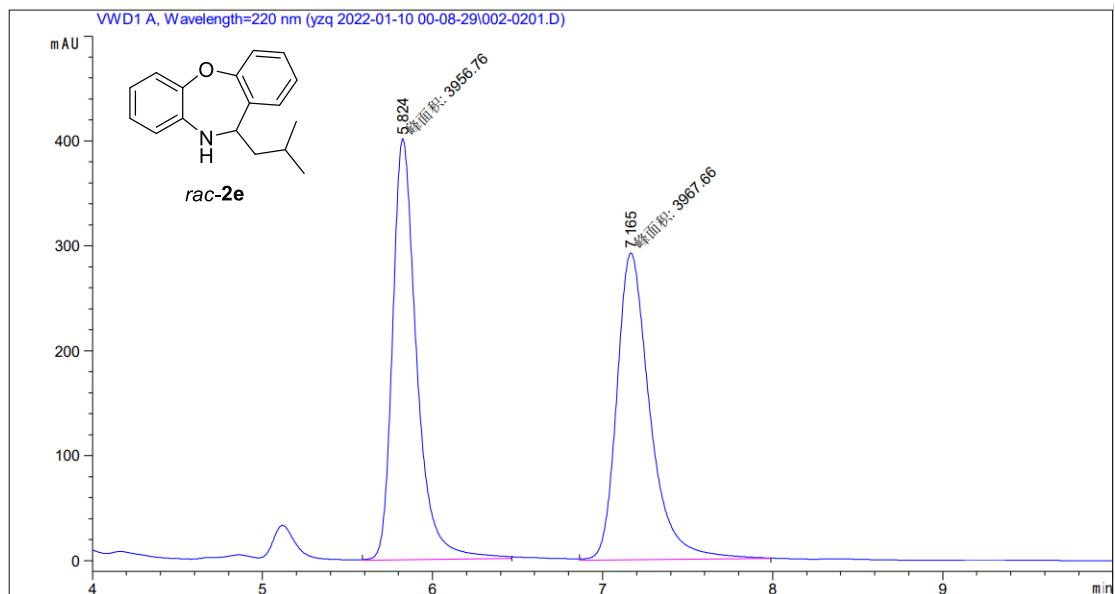

| 峰 # | 保留时间 [min] | 类型 | 峰宽 [min] | 峰面积 [mAU*s] | 峰高 [mAU]  | 峰面积 %   |
|-----|------------|----|----------|-------------|-----------|---------|
| 1   | 5.824      | MM | 0.1642   | 3956.76465  | 401.62625 | 49.9313 |
| 2   | 7.165      | MM | 0.2260   | 3967.65991  | 292.63208 | 50.0687 |

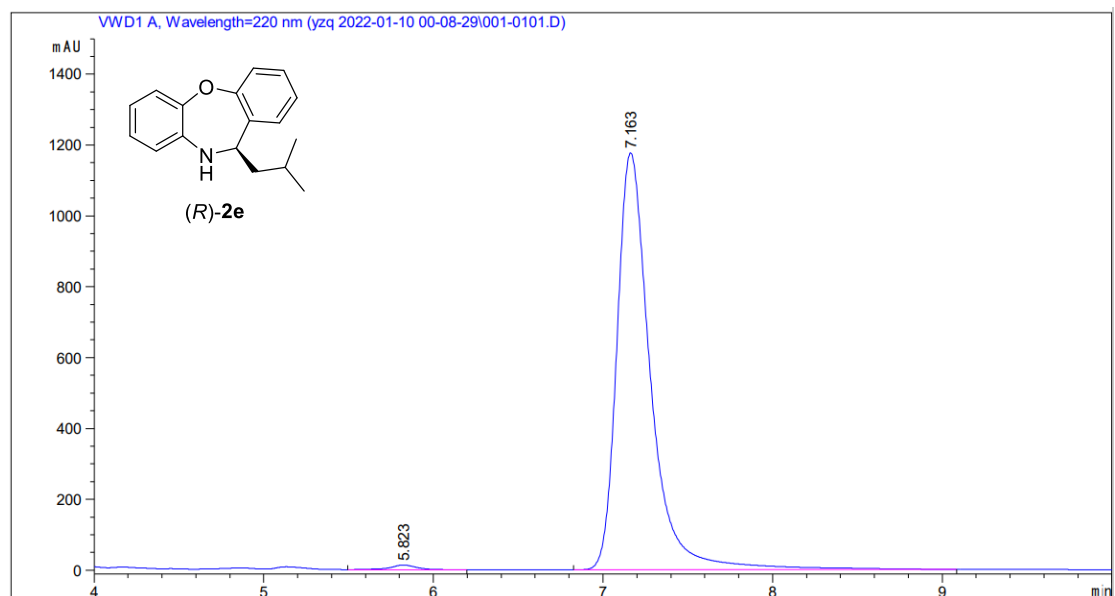

| 峰 # | 保留时间 [min] | 类型 | 峰宽 [min] | 峰面积 [mAU*s] | 峰高 [mAU]   | 峰面积 %   |
|-----|------------|----|----------|-------------|------------|---------|
| 1   | 5.823      | BB | 0.1600   | 143.69049   | 13.20373   | 0.8766  |
| 2   | 7.163      | BB | 0.2080   | 1.62489e4   | 1177.11914 | 99.1234 |

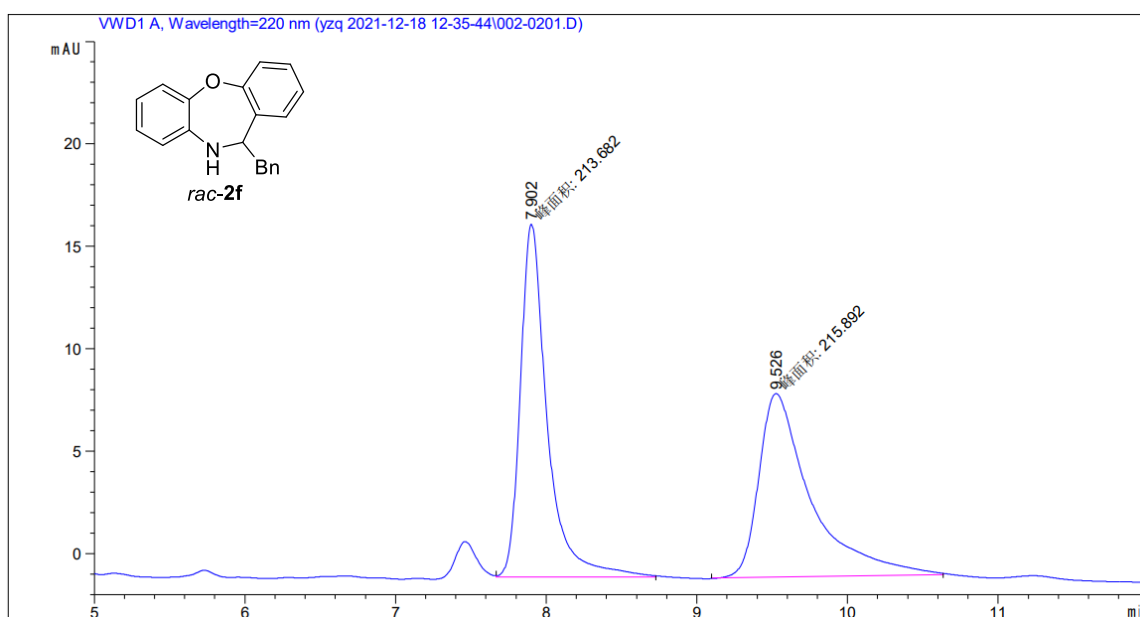

| 峰 # | 保留时间 [min] | 类型 | 峰宽 [min] | 峰面积 [mAU*s] | 峰高 [mAU] | 峰面积 %   |
|-----|------------|----|----------|-------------|----------|---------|
| 1   | 7.902      | MM | 0.2069   | 213.68236   | 17.21046 | 49.7428 |
| 2   | 9.526      | MM | 0.4017   | 215.89204   | 8.95787  | 50.2572 |

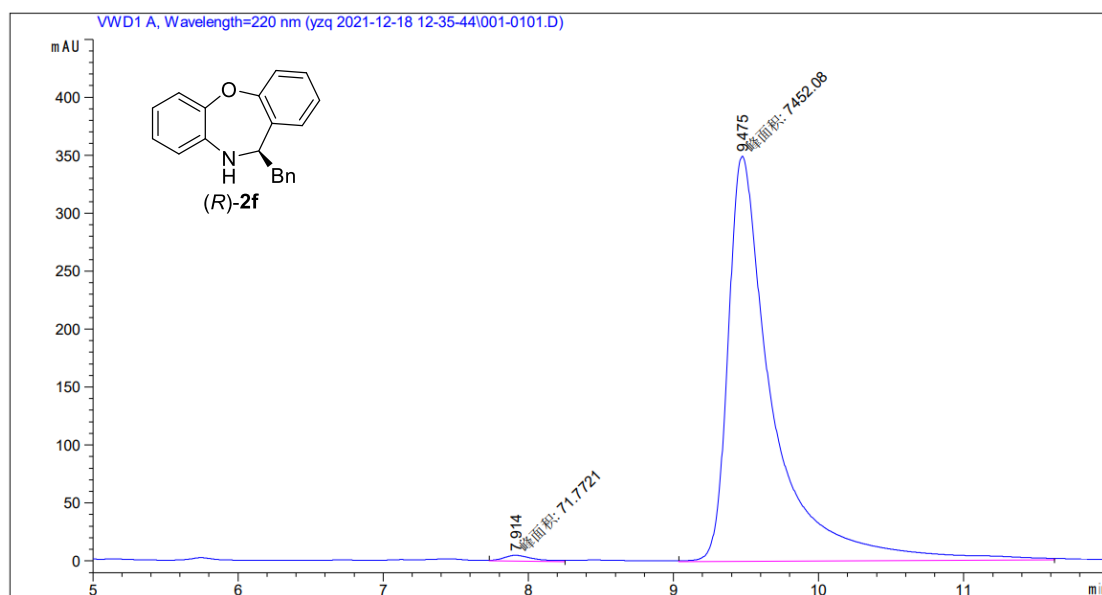

| 峰 # | 保留时间 [min] | 类型 | 峰宽 [min] | 峰面积 [mAU*s] | 峰高 [mAU]  | 峰面积 %   |
|-----|------------|----|----------|-------------|-----------|---------|
| 1   | 7.914      | MM | 0.2415   | 71.77213    | 4.95351   | 0.9539  |
| 2   | 9.475      | MM | 0.3554   | 7452.07764  | 349.43829 | 99.0461 |

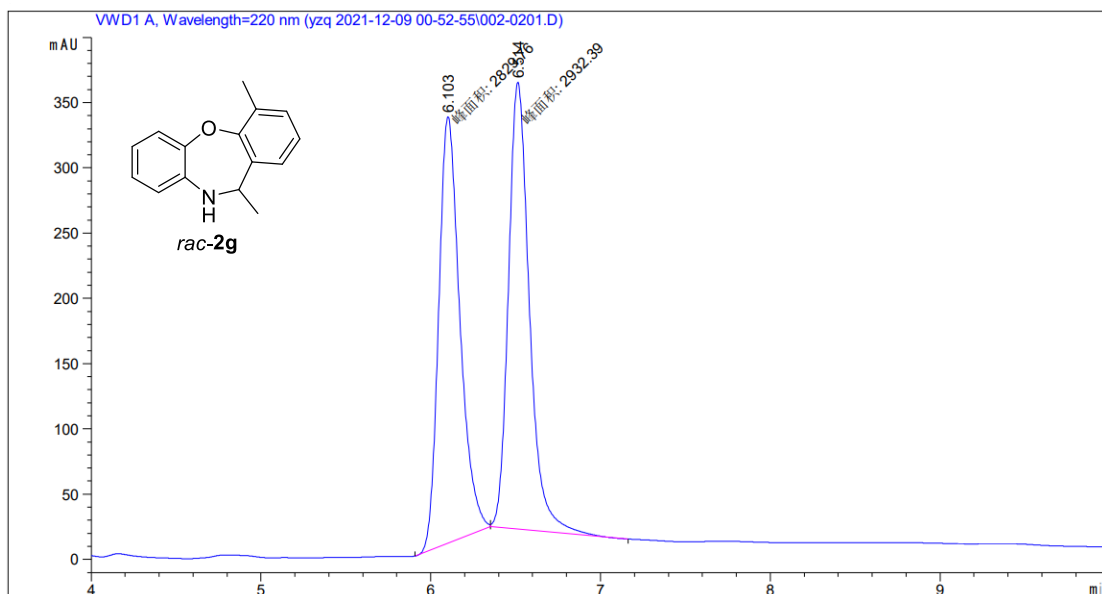

| 峰 # | 保留时间 [min] | 类型 | 峰宽 [min] | 峰面积 [mAU*s] | 峰高 [mAU]  | 峰面积 %   |
|-----|------------|----|----------|-------------|-----------|---------|
| 1   | 6.103      | MM | 0.1443   | 2829.76099  | 326.81302 | 49.1095 |
| 2   | 6.514      | MM | 0.1428   | 2932.38916  | 342.15329 | 50.8905 |

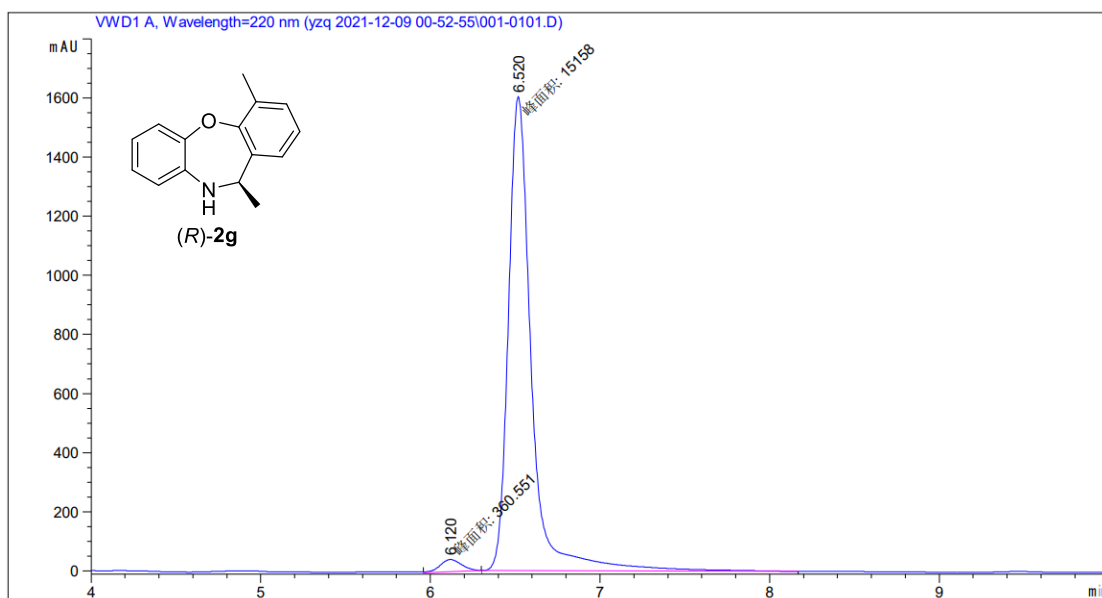

| 峰 # | 保留时间 [min] | 类型 | 峰宽 [min] | 峰面积 [mAU*s] | 峰高 [mAU]   | 峰面积 %   |
|-----|------------|----|----------|-------------|------------|---------|
| 1   | 6.120      | MM | 0.1463   | 360.55060   | 41.06944   | 2.3234  |
| 2   | 6.520      | MM | 0.1576   | 1.51580e4   | 1603.35693 | 97.6766 |

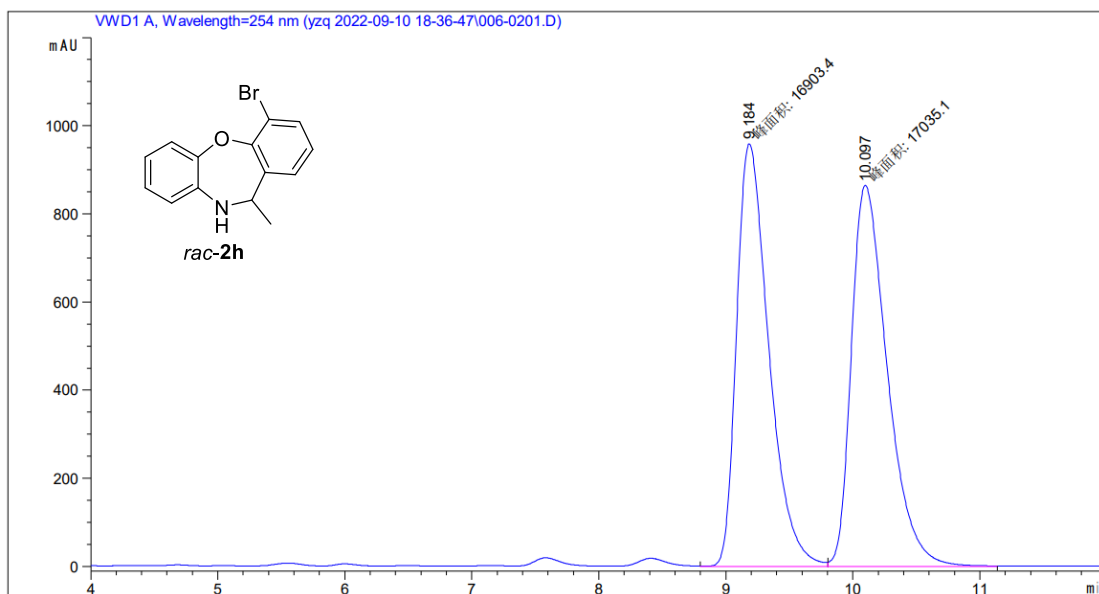

| 峰 # | 保留时间 [min] | 类型 | 峰宽 [min] | 峰面积 [mAU*s] | 峰高 [mAU]  | 峰面积 %   |
|-----|------------|----|----------|-------------|-----------|---------|
| 1   | 9.184      | MM | 0.2937   | 1.69034e4   | 959.37061 | 49.8060 |
| 2   | 10.097     | MM | 0.3283   | 1.70351e4   | 864.69208 | 50.1940 |

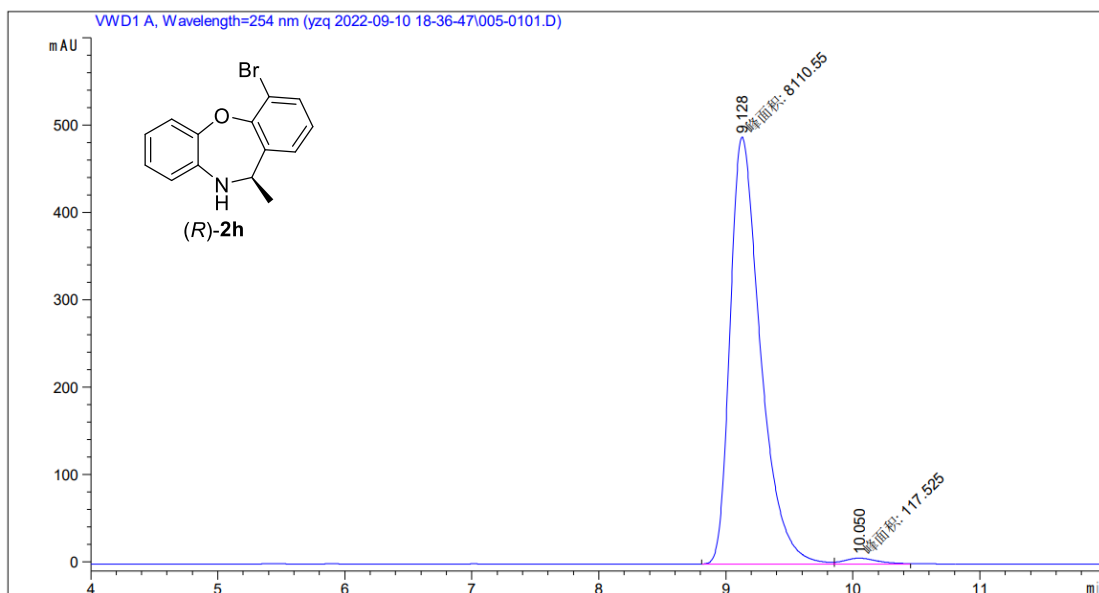

| 峰 # | 保留时间 [min] | 类型 | 峰宽 [min] | 峰面积 [mAU*s] | 峰高 [mAU]  | 峰面积 %   |
|-----|------------|----|----------|-------------|-----------|---------|
| 1   | 9.128      | MM | 0.2767   | 8110.55078  | 488.48135 | 98.5717 |
| 2   | 10.050     | MM | 0.2971   | 117.52460   | 6.59289   | 1.4283  |

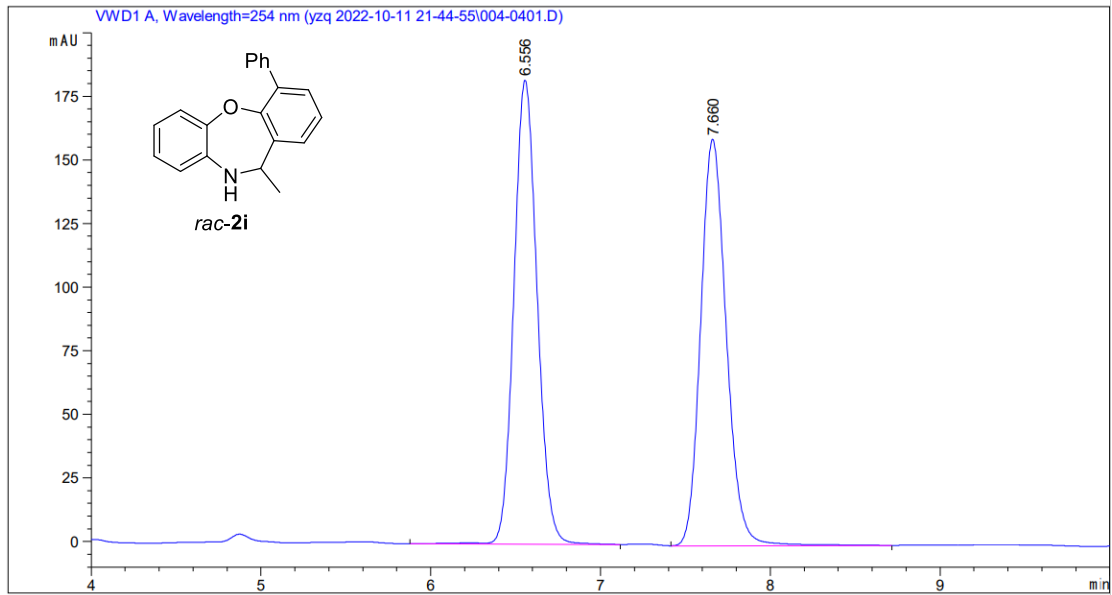

| 峰 # | 保留时间 [min] | 类型   | 峰宽 [min] | 峰面积 [mAU*s] | 峰高 [mAU]  | 峰面积 %   |
|-----|------------|------|----------|-------------|-----------|---------|
| 1   | 6.556      | VB R | 0.1480   | 1735.50037  | 182.43024 | 50.8752 |
| 2   | 7.660      | BB   | 0.1624   | 1675.78918  | 159.72038 | 49.1248 |

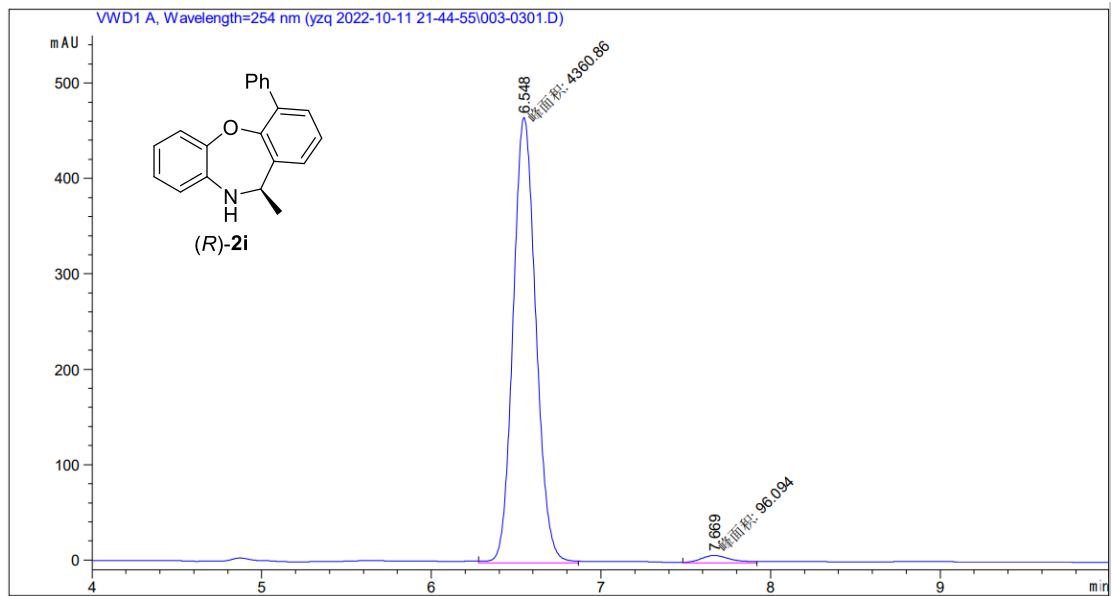

| 峰 # | 保留时间 [min] | 类型 | 峰宽 [min] | 峰面积 [mAU*s] | 峰高 [mAU]  | 峰面积 %   |
|-----|------------|----|----------|-------------|-----------|---------|
| 1   | 6.548      | MM | 0.1557   | 4360.86035  | 466.79453 | 97.8440 |
| 2   | 7.669      | MM | 0.2075   | 96.09402    | 7.71751   | 2.1560  |



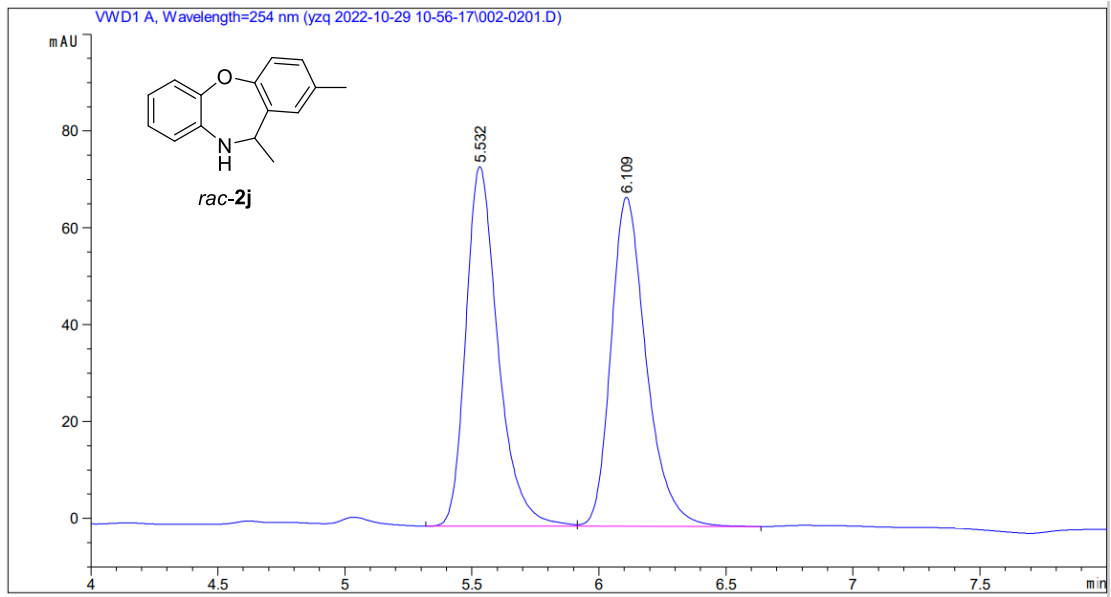

| 峰 # | 保留时间 [min] | 类型 | 峰宽 [min] | 峰面积 [mAU*s] | 峰高 [mAU] | 峰面积 %   |
|-----|------------|----|----------|-------------|----------|---------|
| 1   | 5.532      | BV | 0.1341   | 656.26013   | 74.26038 | 49.9608 |
| 2   | 6.109      | VB | 0.1468   | 657.28894   | 67.97305 | 50.0392 |

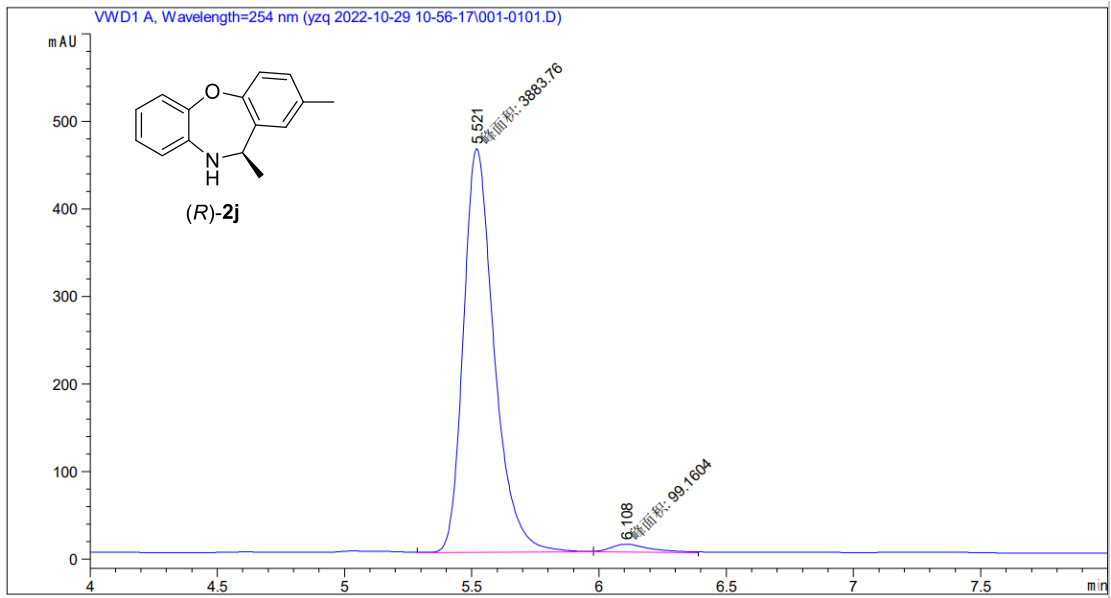

| 峰 # | 保留时间 [min] | 类型 | 峰宽 [min] | 峰面积 [mAU*s] | 峰高 [mAU]  | 峰面积 %   |
|-----|------------|----|----------|-------------|-----------|---------|
| 1   | 5.521      | MM | 0.1404   | 3883.76074  | 461.14517 | 97.5104 |
| 2   | 6.108      | MM | 0.1807   | 99.16038    | 9.14580   | 2.4896  |

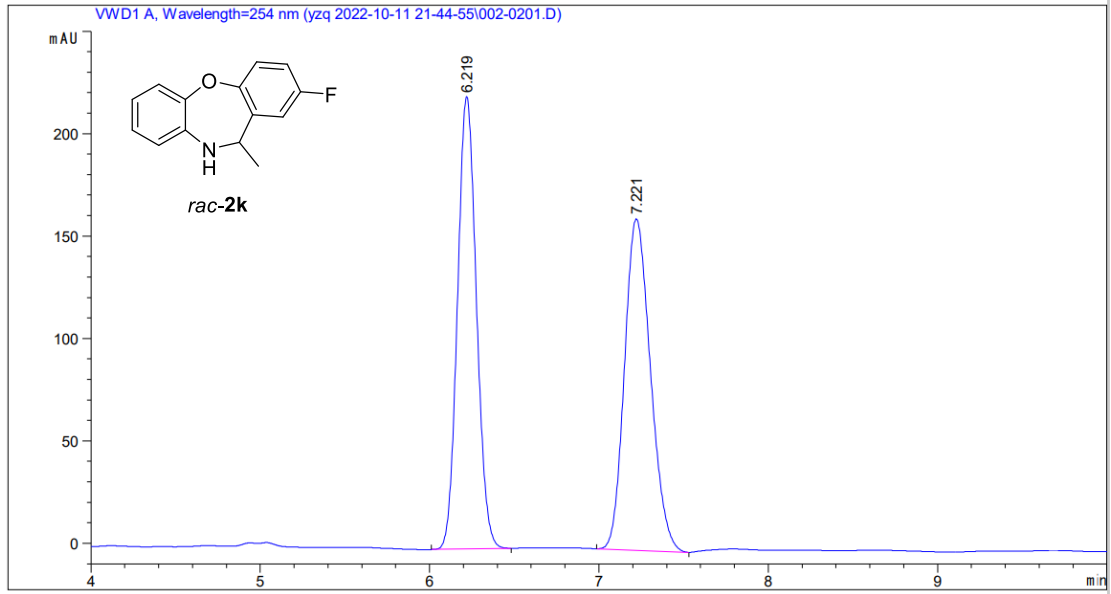

| 峰 # | 保留时间 [min] | 类型 | 峰宽 [min] | 峰面积 [mAU*s] | 峰高 [mAU]  | 峰面积 %   |
|-----|------------|----|----------|-------------|-----------|---------|
| 1   | 6.219      | BB | 0.1205   | 1712.26758  | 220.83284 | 49.8881 |
| 2   | 7.221      | BB | 0.1650   | 1719.95007  | 161.82474 | 50.1119 |

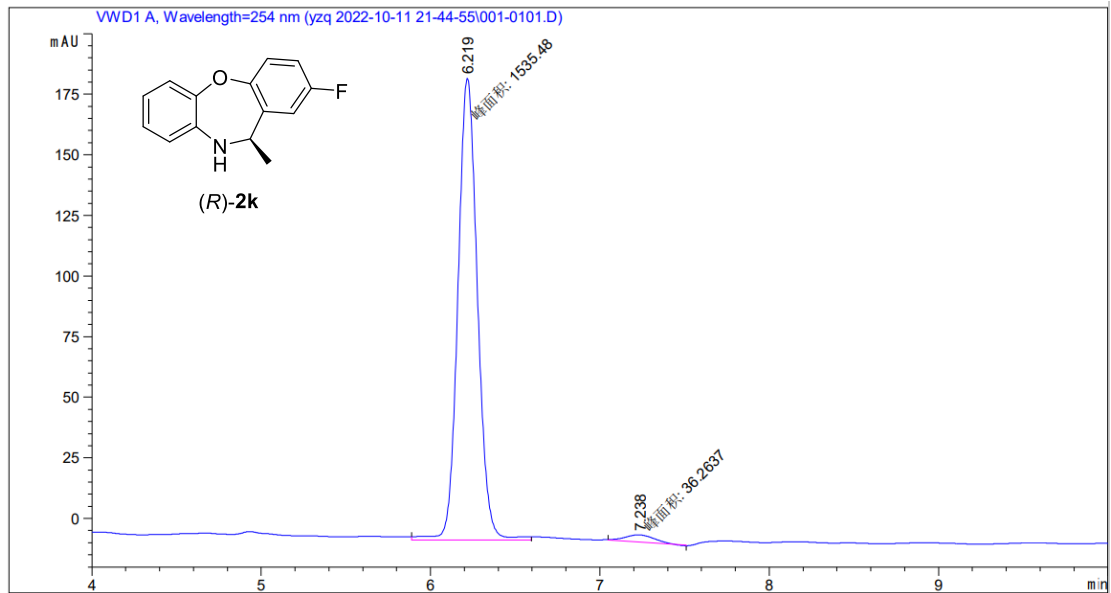

| 峰 # | 保留时间 [min] | 类型 | 峰宽 [min] | 峰面积 [mAU*s] | 峰高 [mAU]  | 峰面积 %   |
|-----|------------|----|----------|-------------|-----------|---------|
| 1   | 6.219      | MM | 0.1343   | 1535.47925  | 190.55466 | 97.6928 |
| 2   | 7.238      | MM | 0.2002   | 36.26373    | 3.01918   | 2.3072  |

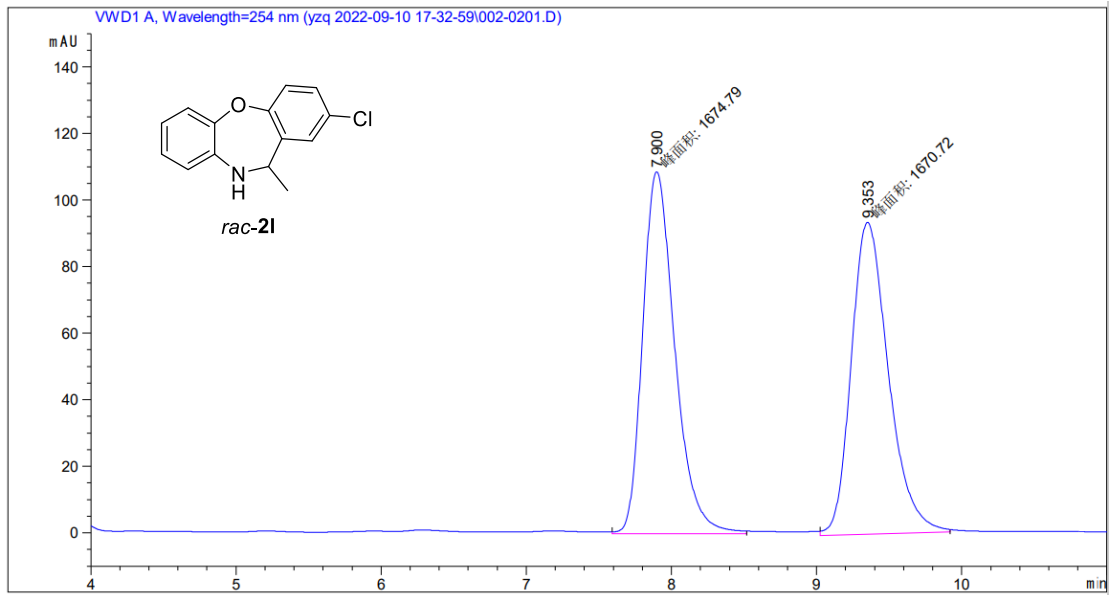

| 峰 # | 保留时间 [min] | 类型 | 峰宽 [min] | 峰面积 [mAU*s] | 峰高 [mAU]  | 峰面积 %   |
|-----|------------|----|----------|-------------|-----------|---------|
| 1   | 7.900      | MM | 0.2569   | 1674.78992  | 108.65009 | 50.0609 |
| 2   | 9.353      | MM | 0.2971   | 1670.71606  | 93.71886  | 49.9391 |

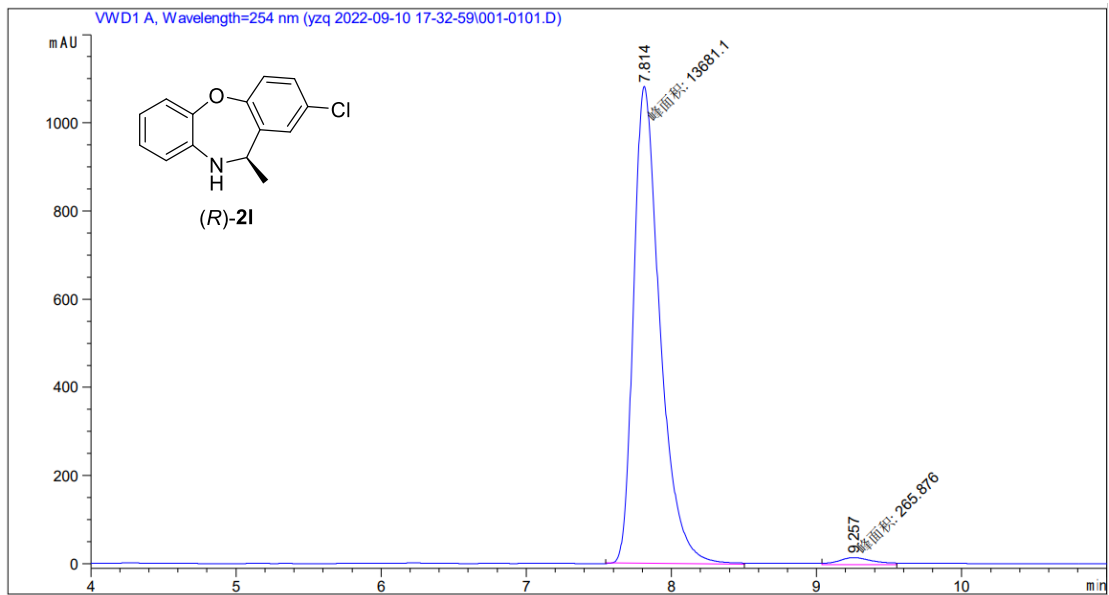

| 峰 # | 保留时间 [min] | 类型 | 峰宽 [min] | 峰面积 [mAU*s] | 峰高 [mAU]   | 峰面积 %   |
|-----|------------|----|----------|-------------|------------|---------|
| 1   | 7.814      | MM | 0.2109   | 1.36811e4   | 1081.13208 | 98.0937 |
| 2   | 9.257      | MM | 0.2785   | 265.87637   | 15.91228   | 1.9063  |

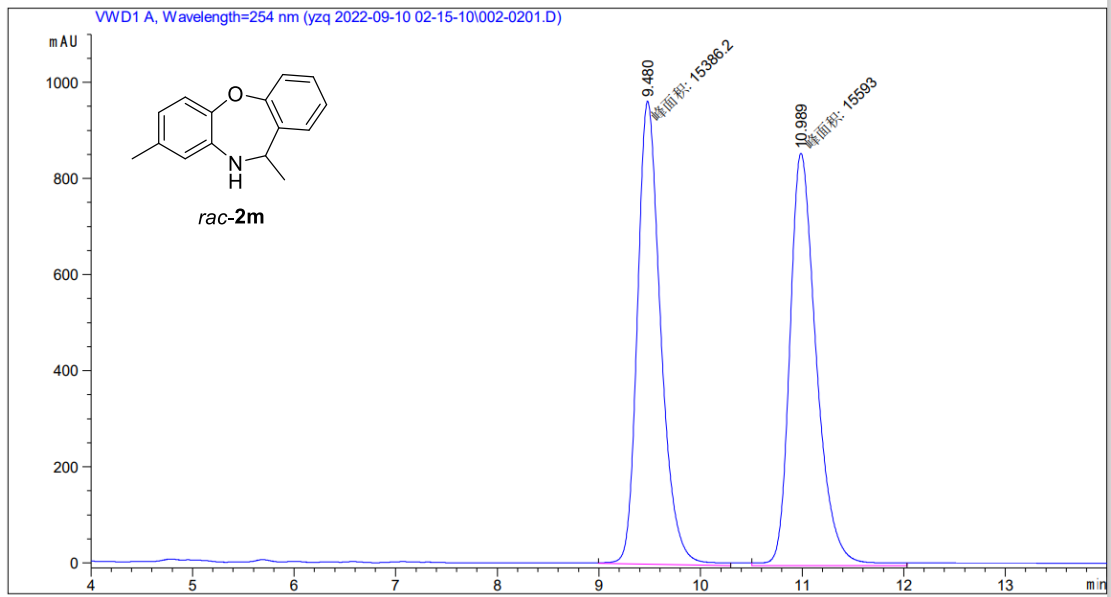

| 峰 # | 保留时间 [min] | 类型 | 峰宽 [min] | 峰面积 [mAU*s] | 峰高 [mAU]  | 峰面积 %   |
|-----|------------|----|----------|-------------|-----------|---------|
| 1   | 9.480      | MM | 0.2661   | 1.53862e4   | 963.64459 | 49.6661 |
| 2   | 10.989     | MM | 0.3030   | 1.55930e4   | 857.83191 | 50.3339 |

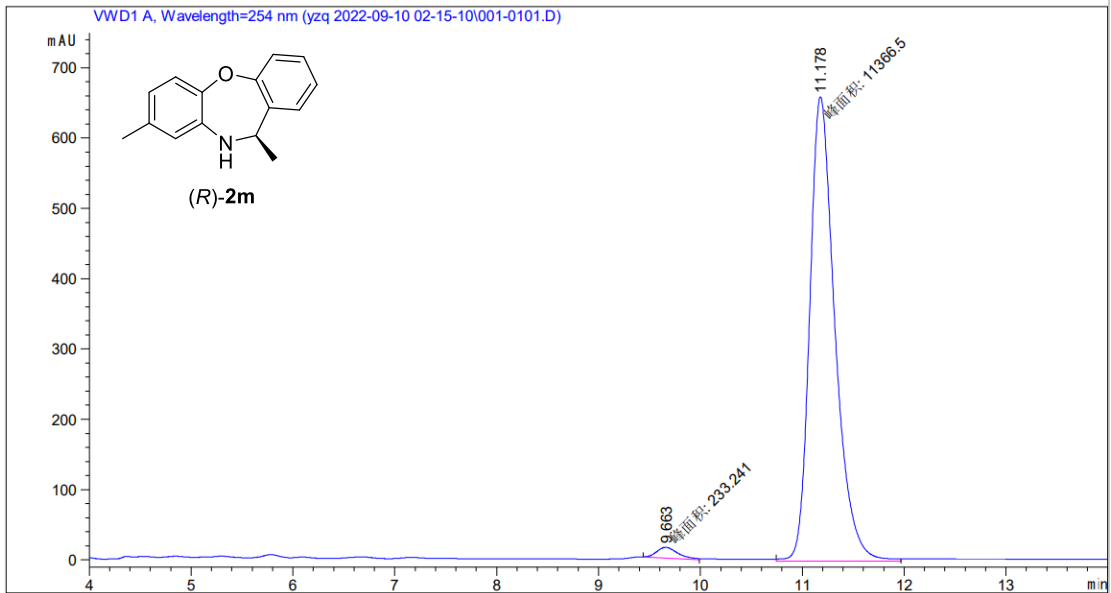

| 峰 # | 保留时间 [min] | 类型 | 峰宽 [min] | 峰面积 [mAU*s] | 峰高 [mAU]  | 峰面积 %   |
|-----|------------|----|----------|-------------|-----------|---------|
| 1   | 9.663      | MM | 0.2493   | 233.24057   | 15.59130  | 2.0107  |
| 2   | 11.178     | MM | 0.2868   | 1.13665e4   | 660.55127 | 97.9893 |

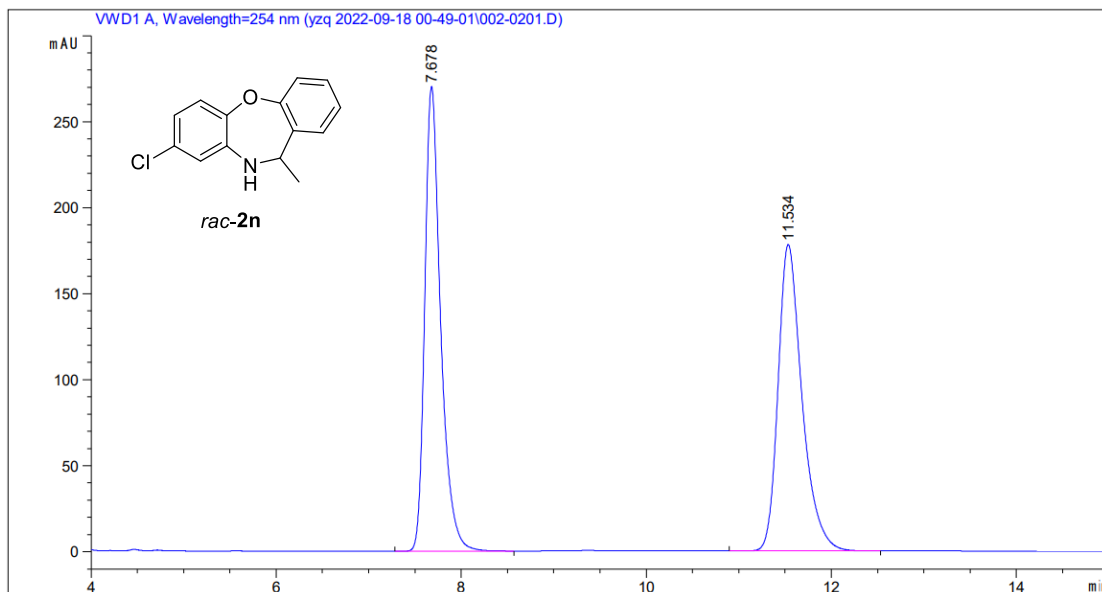

| 峰 # | 保留时间 [min] | 类型 | 峰宽 [min] | 峰面积 [mAU*s] | 峰高 [mAU]  | 峰面积 %   |
|-----|------------|----|----------|-------------|-----------|---------|
| 1   | 7.678      | BB | 0.1777   | 3211.87427  | 270.16354 | 50.0868 |
| 2   | 11.534     | BB | 0.2695   | 3200.73779  | 178.20679 | 49.9132 |

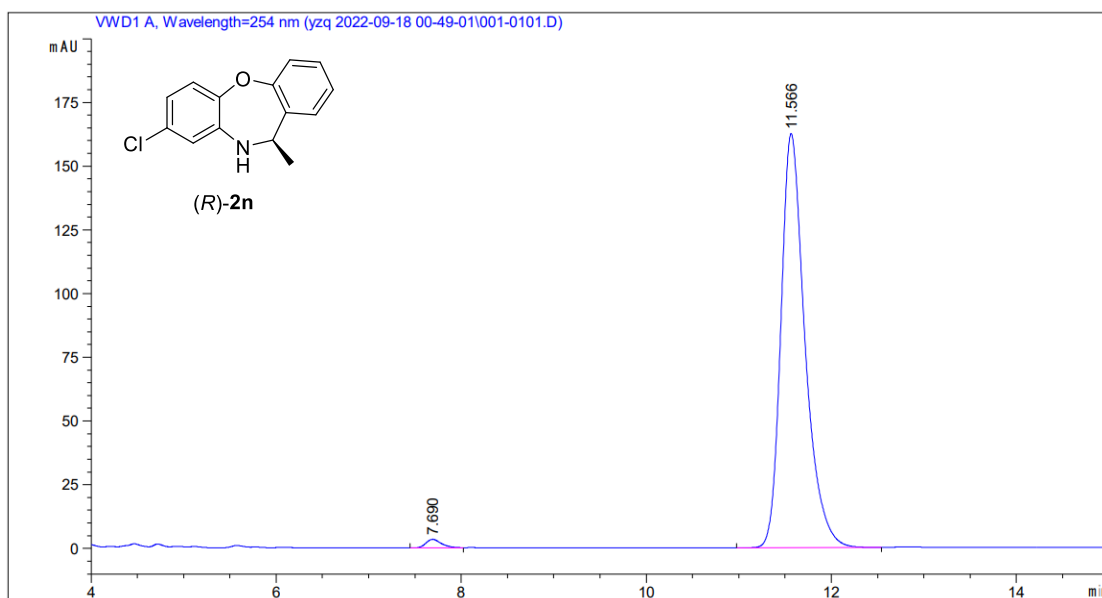

| 峰 # | 保留时间 [min] | 类型 | 峰宽 [min] | 峰面积 [mAU*s] | 峰高 [mAU]  | 峰面积 %   |
|-----|------------|----|----------|-------------|-----------|---------|
| 1   | 7.690      | BB | 0.1735   | 38.71240    | 3.35792   | 1.3029  |
| 2   | 11.566     | BB | 0.2716   | 2932.63623  | 162.49332 | 98.6971 |

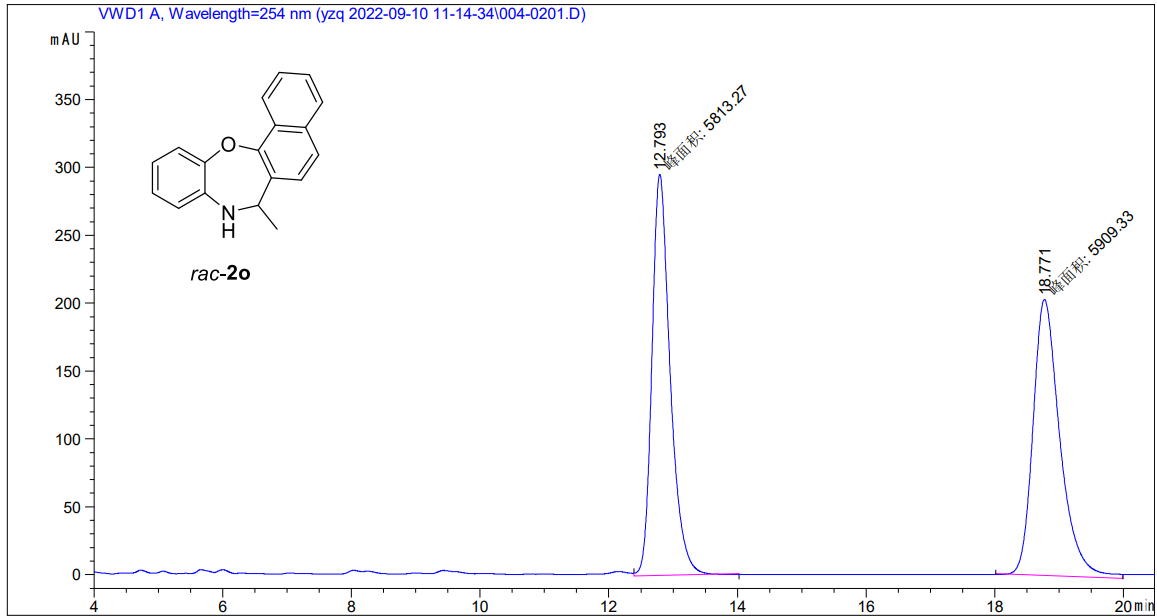

| 峰 # | 保留时间 [min] | 类型 | 峰宽 [min] | 峰面积 [mAU*s] | 峰高 [mAU]  | 峰面积 %   |
|-----|------------|----|----------|-------------|-----------|---------|
| 1   | 12.793     | MM | 0.3279   | 5813.26709  | 295.52185 | 49.5903 |
| 2   | 18.771     | MM | 0.4845   | 5909.32764  | 203.26321 | 50.4097 |

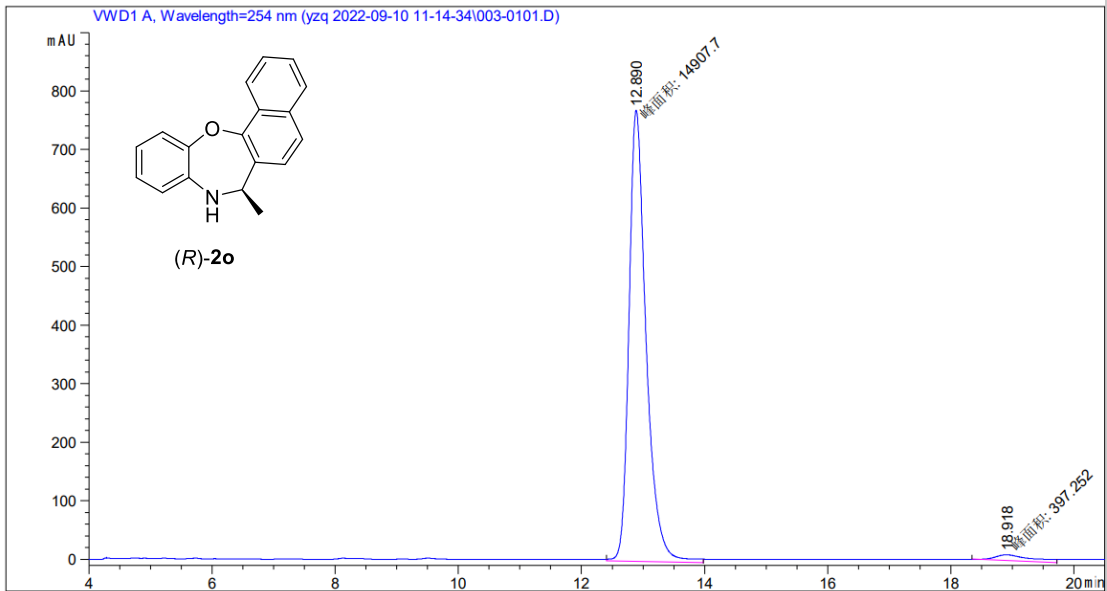

| 峰 # | 保留时间 [min] | 类型 | 峰宽 [min] | 峰面积 [mAU*s] | 峰高 [mAU]  | 峰面积 %   |
|-----|------------|----|----------|-------------|-----------|---------|
| 1   | 12.890     | MM | 0.3226   | 1.49077e4   | 770.06824 | 97.4044 |
| 2   | 18.918     | MM | 0.6986   | 397.25153   | 9.47770   | 2.5956  |

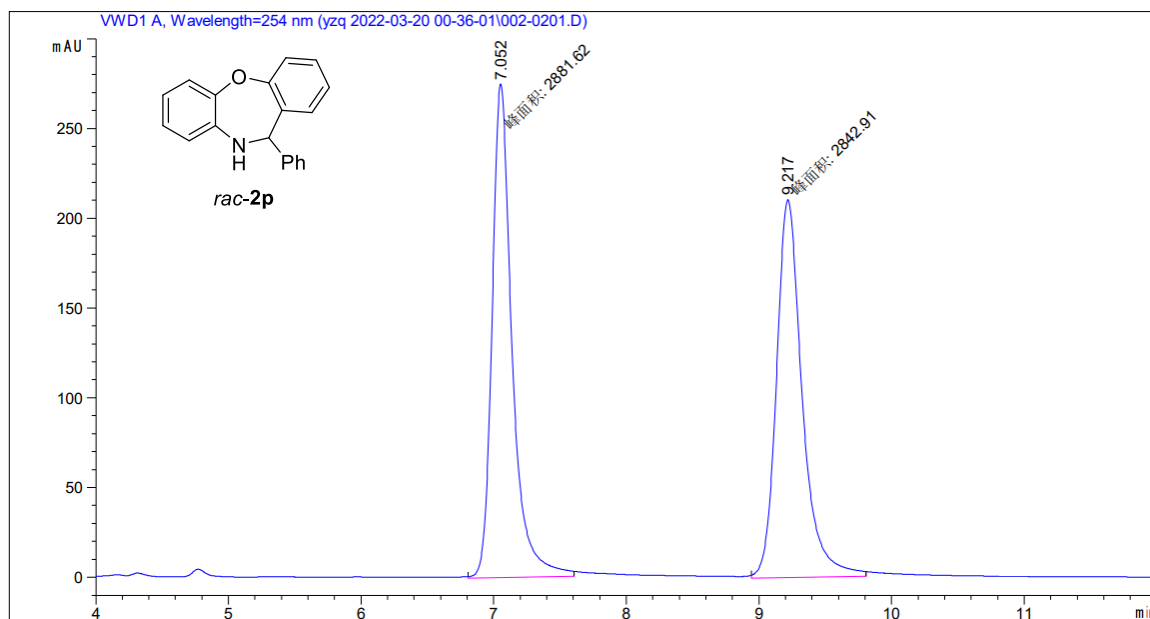

| 峰 # | 保留时间 [min] | 类型 | 峰宽 [min] | 峰面积 [mAU*s] | 峰高 [mAU]  | 峰面积 %   |
|-----|------------|----|----------|-------------|-----------|---------|
| 1   | 7.052      | MM | 0.1747   | 2881.61548  | 274.93240 | 50.3381 |
| 2   | 9.217      | MM | 0.2250   | 2842.91040  | 210.57024 | 49.6619 |

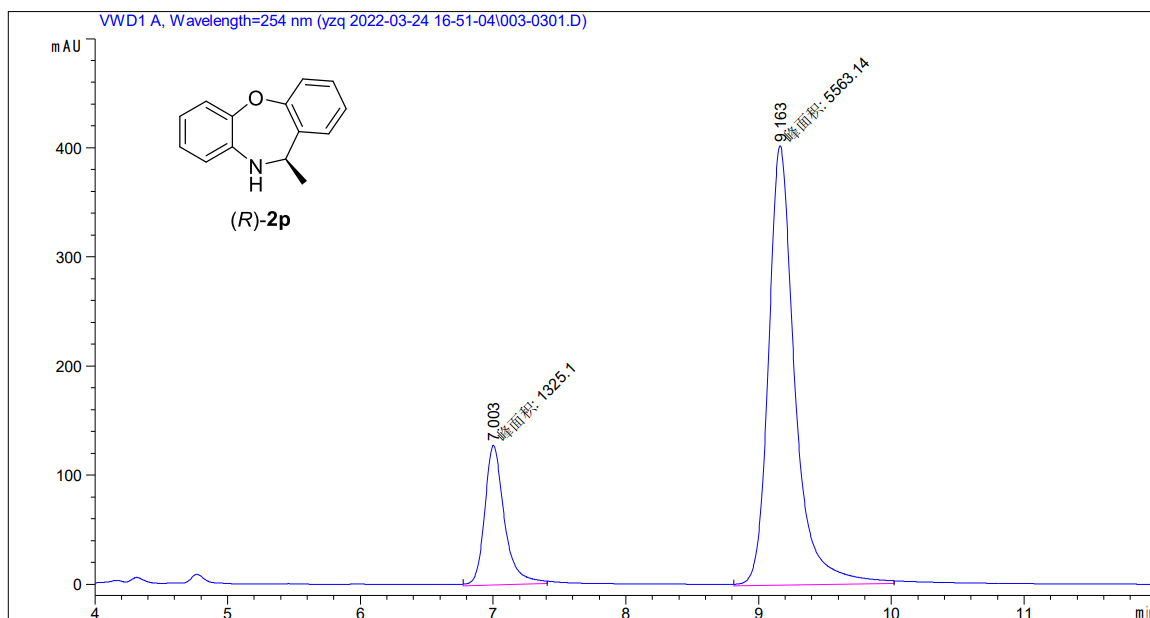

| 峰 # | 保留时间 [min] | 类型 | 峰宽 [min] | 峰面积 [mAU*s] | 峰高 [mAU]  | 峰面积 %   |
|-----|------------|----|----------|-------------|-----------|---------|
| 1   | 7.003      | MM | 0.1726   | 1325.10217  | 127.97246 | 19.2372 |
| 2   | 9.163      | MM | 0.2303   | 5563.14063  | 402.68359 | 80.7628 |

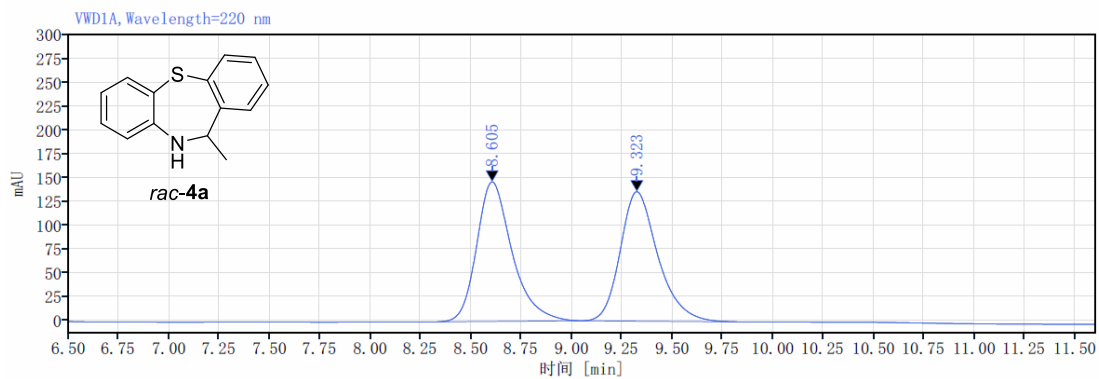

信号: VWD1A, Wavelength=220 nm

| 保留时间 [min] | 类型   | 峰宽 [min] | 峰面积     | 峰高     | 峰面积%  |
|------------|------|----------|---------|--------|-------|
| 8.605      | MM m | 0.83     | 1787.60 | 146.32 | 50.31 |
| 9.323      | MM m | 0.90     | 1765.74 | 135.72 | 49.69 |
| 总和         |      |          | 3553.35 |        |       |

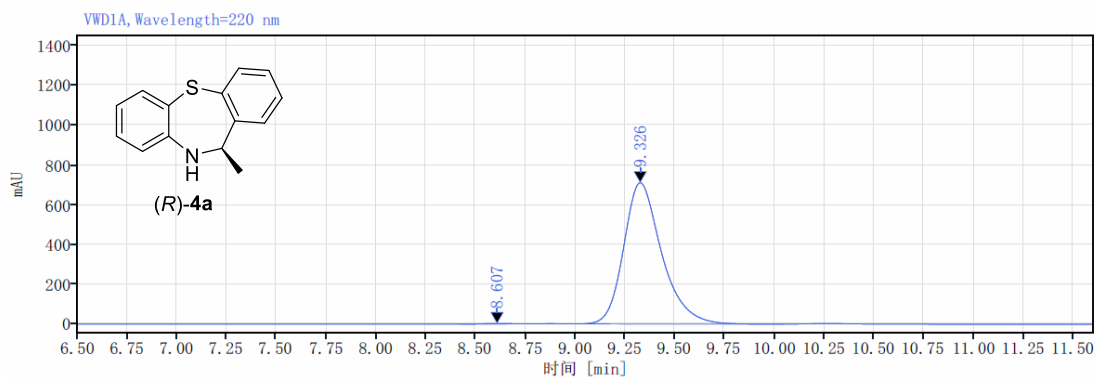

信号: VWD1A, Wavelength=220 nm

| 保留时间 [min] | 类型   | 峰宽 [min] | 峰面积     | 峰高     | 峰面积%  |
|------------|------|----------|---------|--------|-------|
| 8.607      | MM m | 0.34     | 22.50   | 2.47   | 0.24  |
| 9.326      | MM m | 1.06     | 9430.28 | 711.50 | 99.76 |
| 总和         |      |          | 9452.77 |        |       |



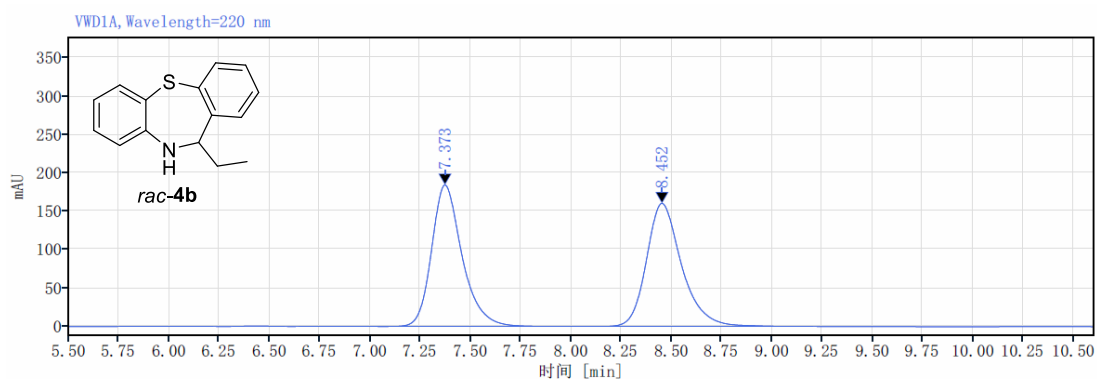

信号: VWD1A, Wavelength=220 nm

| 保留时间 [min] | 类型   | 峰宽 [min] | 峰面积     | 峰高     | 峰面积%  |
|------------|------|----------|---------|--------|-------|
| 7.373      | MM m | 0.90     | 1942.98 | 184.50 | 49.92 |
| 8.452      | MM m | 1.13     | 1949.37 | 160.47 | 50.08 |
| 总和         |      |          | 3892.36 |        |       |

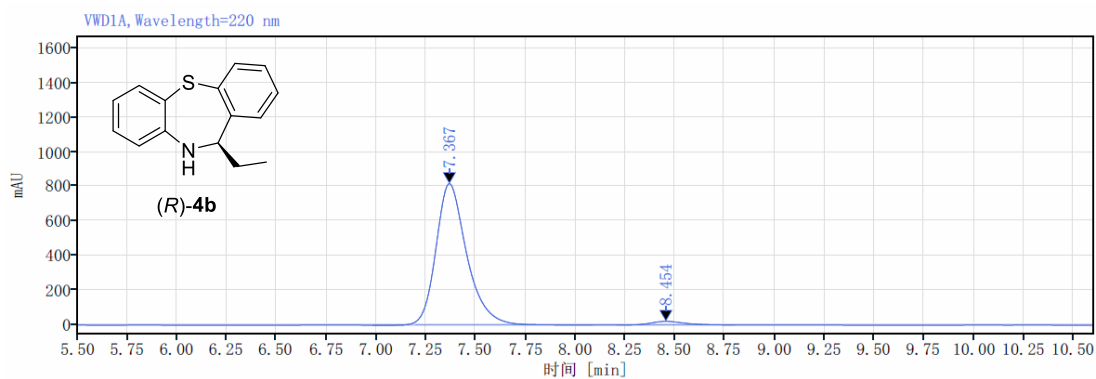

信号: VWD1A, Wavelength=220 nm

| 保留时间 [min] | 类型   | 峰宽 [min] | 峰面积     | 峰高     | 峰面积%  |
|------------|------|----------|---------|--------|-------|
| 7.367      | MM m | 1.10     | 8795.64 | 817.10 | 97.26 |
| 8.454      | MM m | 0.59     | 247.92  | 21.19  | 2.74  |
| 总和         |      |          | 9043.56 |        |       |

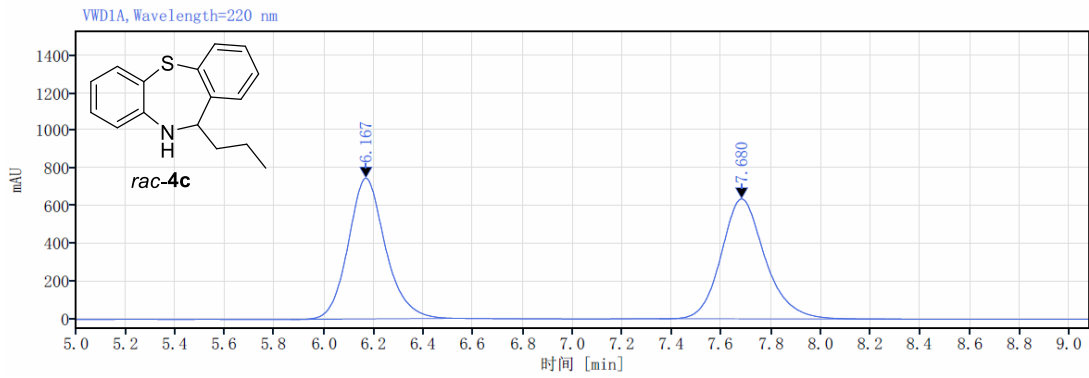

信号: VWD1A, Wavelength=220 nm

| 保留时间 [min] | 类型   | 峰宽 [min] | 峰面积      | 峰高     | 峰面积%  |
|------------|------|----------|----------|--------|-------|
| 6.167      | MM m | 0.67     | 7770.11  | 745.23 | 49.86 |
| 7.680      | MM m | 1.03     | 7813.31  | 635.68 | 50.14 |
| 总和         |      |          | 15583.42 |        |       |

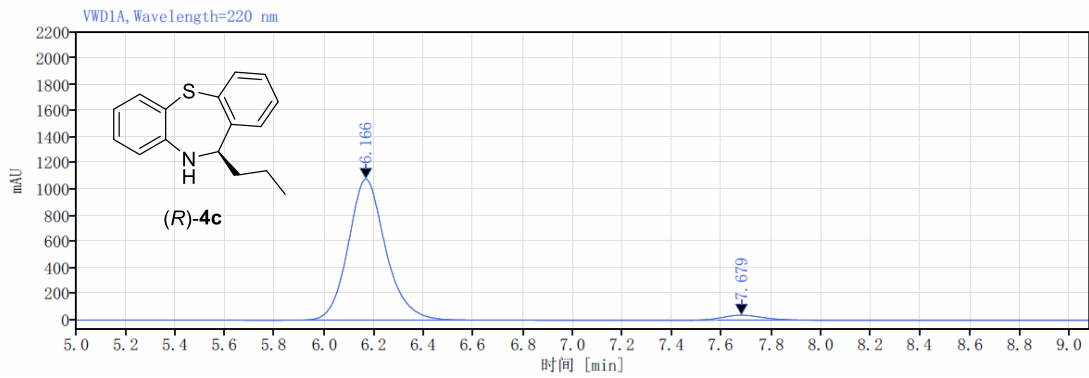

信号: VWD1A, Wavelength=220 nm

| 保留时间 [min] | 类型   | 峰宽 [min] | 峰面积      | 峰高      | 峰面积%  |
|------------|------|----------|----------|---------|-------|
| 6.166      | MM m | 0.85     | 11324.71 | 1079.29 | 96.28 |
| 7.679      | MM m | 0.45     | 438.04   | 38.92   | 3.72  |
| 总和         |      |          | 11762.75 |         |       |

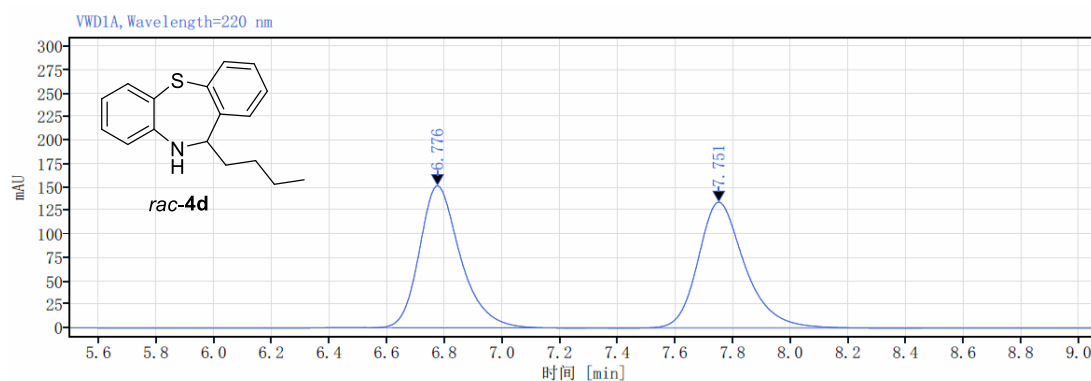

信号: VWD1A, Wavelength=220 nm

| 保留时间 [min] | 类型   | 峰宽 [min] | 峰面积     | 峰高     | 峰面积%  |
|------------|------|----------|---------|--------|-------|
| 6.776      | MM m | 0.77     | 1497.09 | 151.66 | 49.69 |
| 7.751      | MM m | 1.09     | 1515.85 | 134.38 | 50.31 |
| 总和         |      |          | 3012.93 |        |       |

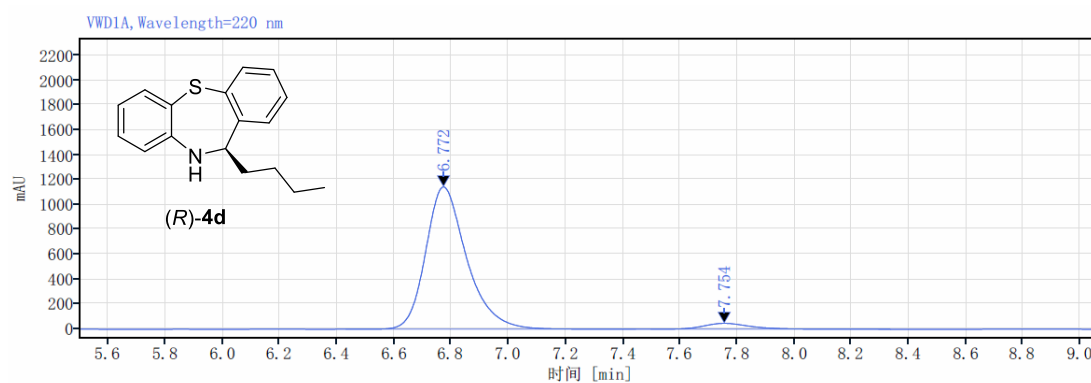

信号: VWD1A, Wavelength=220 nm

| 保留时间 [min] | 类型   | 峰宽 [min] | 峰面积      | 峰高      | 峰面积%  |
|------------|------|----------|----------|---------|-------|
| 6.772      | MM m | 1.01     | 11417.29 | 1143.13 | 95.49 |
| 7.754      | MM m | 0.84     | 539.56   | 47.05   | 4.51  |
| 总和         |      |          | 11956.85 |         |       |

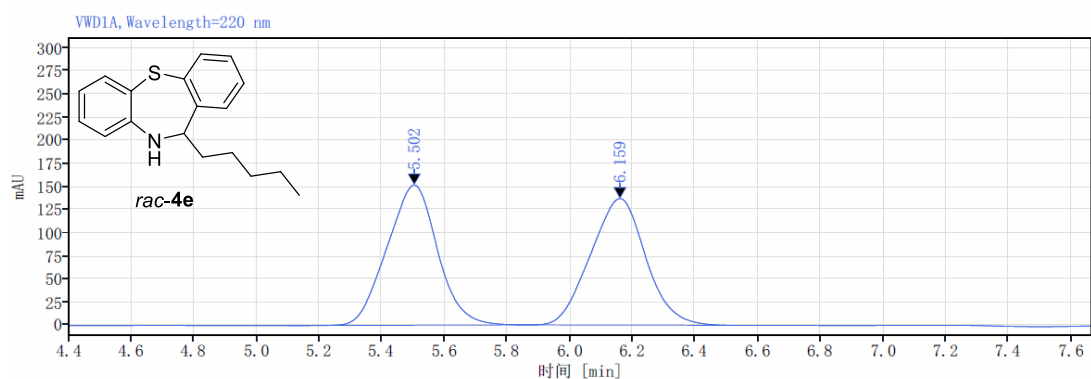

信号: VWD1A, Wavelength=220 nm

| 保留时间 [min] | 类型   | 峰宽 [min] | 峰面积     | 峰高     | 峰面积%  |
|------------|------|----------|---------|--------|-------|
| 5.502      | MM m | 0.75     | 1702.73 | 151.64 | 50.39 |
| 6.159      | MM m | 0.78     | 1676.67 | 136.88 | 49.61 |
| 总和         |      |          | 3379.41 |        |       |

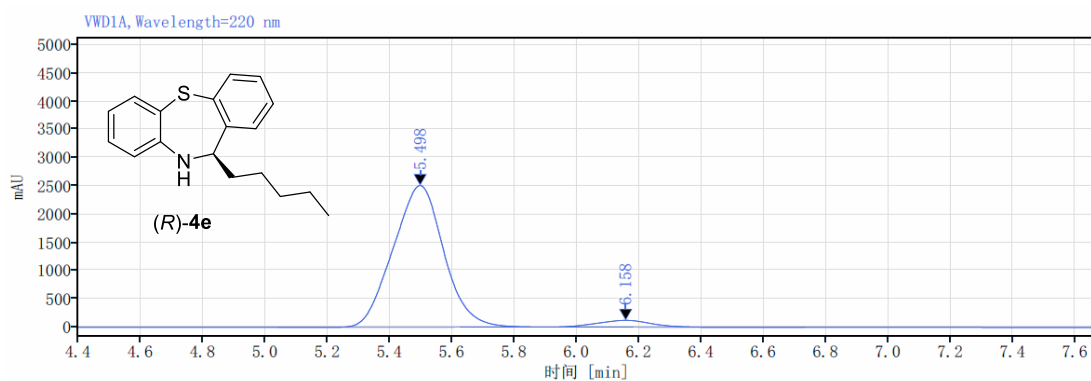

信号: VWD1A, Wavelength=220 nm

| 保留时间 [min] | 类型   | 峰宽 [min] | 峰面积      | 峰高      | 峰面积%  |
|------------|------|----------|----------|---------|-------|
| 5.498      | MM m | 0.86     | 28379.11 | 2509.57 | 95.18 |
| 6.158      | MM m | 0.83     | 1436.04  | 120.51  | 4.82  |
| 总和         |      |          | 29815.15 |         |       |

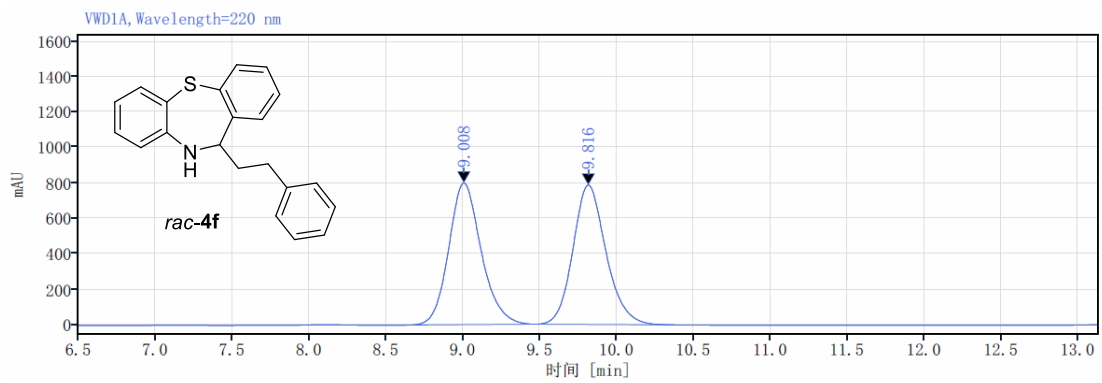

信号: VWD1A, Wavelength=220 nm

| 保留时间 [min] | 类型   | 峰宽 [min] | 峰面积      | 峰高     | 峰面积%  |
|------------|------|----------|----------|--------|-------|
| 9.008      | MM m | 0.80     | 11732.21 | 799.54 | 49.96 |
| 9.816      | MM m | 0.98     | 11748.67 | 786.66 | 50.04 |
| 总和         |      |          | 23480.88 |        |       |

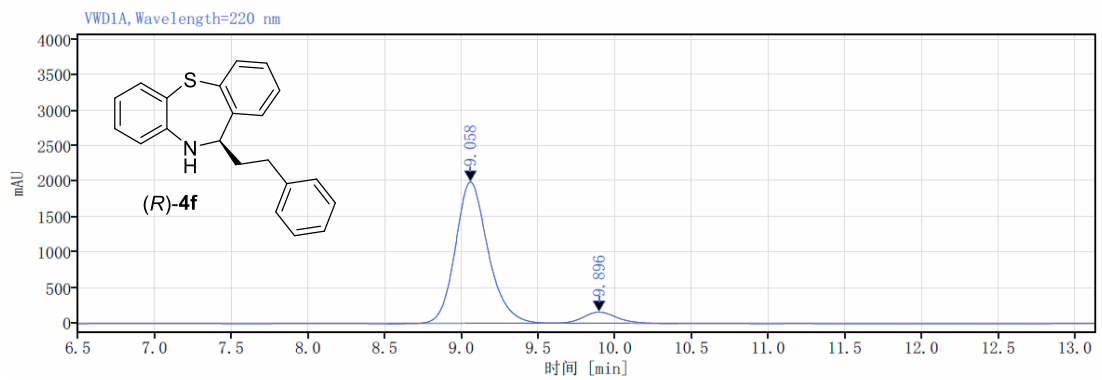

信号: VWD1A, Wavelength=220 nm

| 保留时间 [min] | 类型   | 峰宽 [min] | 峰面积      | 峰高      | 峰面积%  |
|------------|------|----------|----------|---------|-------|
| 9.058      | MM m | 1.09     | 29551.95 | 1994.70 | 92.46 |
| 9.896      | MM m | 0.82     | 2409.56  | 159.24  | 7.54  |
| 总和         |      |          | 31961.51 |         |       |

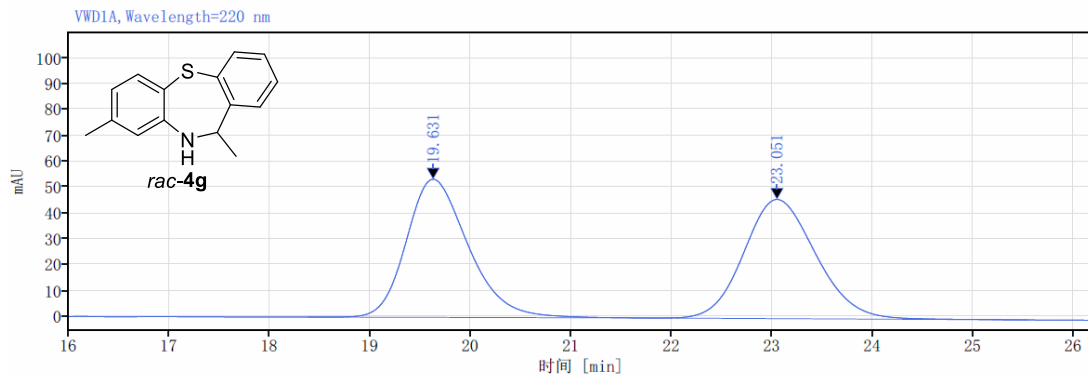

信号: VWD1A, Wavelength=220 nm

| 保留时间 [min] | 类型   | 峰宽 [min] | 峰面积     | 峰高    | 峰面积%  |
|------------|------|----------|---------|-------|-------|
| 19.631     | MM m | 3.26     | 2282.56 | 53.31 | 49.91 |
| 23.051     | MM m | 3.91     | 2290.77 | 46.00 | 50.09 |
| 总和         |      |          | 4573.33 |       |       |

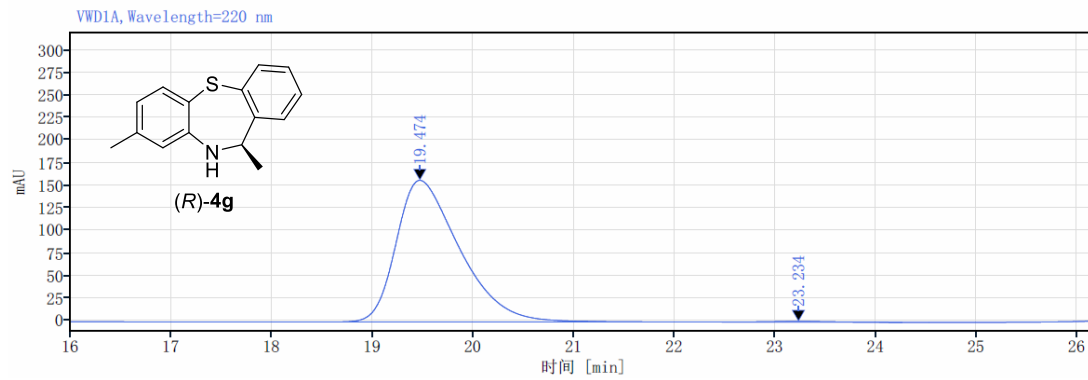

信号: VWD1A, Wavelength=220 nm

| 保留时间 [min] | 类型   | 峰宽 [min] | 峰面积     | 峰高     | 峰面积%  |
|------------|------|----------|---------|--------|-------|
| 19.474     | MM m | 3.98     | 6865.43 | 157.02 | 99.44 |
| 23.234     | MM m | 2.02     | 38.64   | 0.83   | 0.56  |
| 总和         |      |          | 6904.07 |        |       |

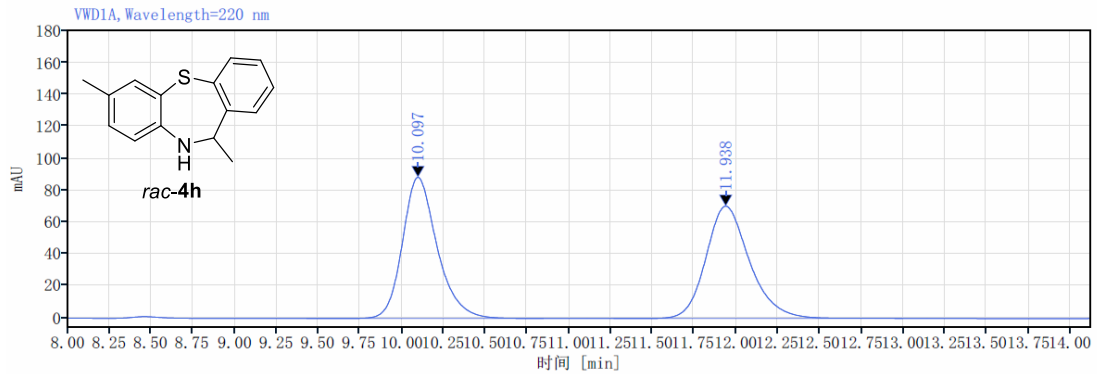

信号: VWD1A, Wavelength=220 nm

| 保留时间 [min] | 类型   | 峰宽 [min] | 峰面积     | 峰高    | 峰面积%  |
|------------|------|----------|---------|-------|-------|
| 10.097     | MM m | 1.42     | 1277.72 | 88.44 | 50.06 |
| 11.938     | MM m | 1.73     | 1274.80 | 70.35 | 49.94 |
| 总和         |      |          | 2552.52 |       |       |

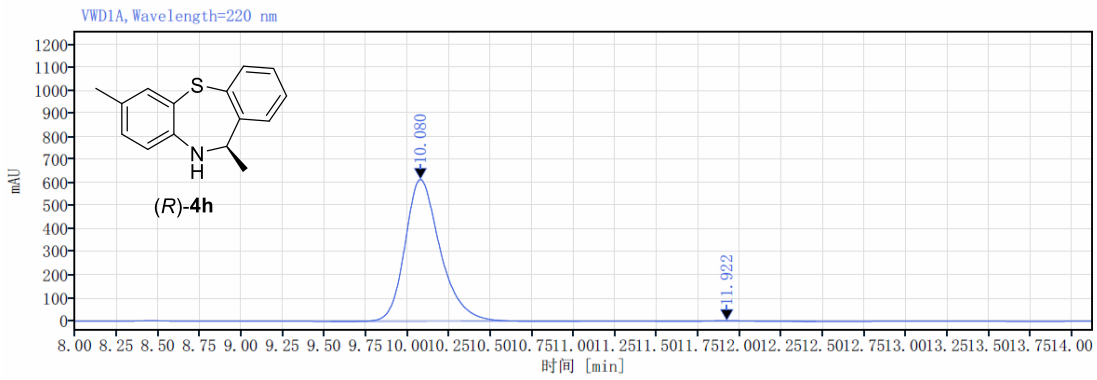

信号: VWD1A, Wavelength=220 nm

| 保留时间 [min] | 类型   | 峰宽 [min] | 峰面积     | 峰高     | 峰面积%  |
|------------|------|----------|---------|--------|-------|
| 10.080     | MM m | 1.50     | 9074.34 | 615.58 | 99.51 |
| 11.922     | MM m | 0.97     | 44.27   | 2.46   | 0.49  |
| 总和         |      |          | 9118.61 |        |       |

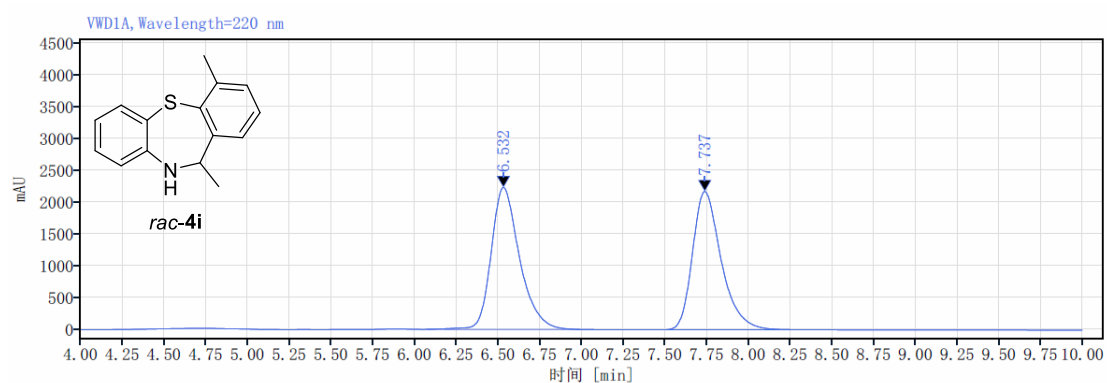

信号: VWD1A, Wavelength=220 nm

| 保留时间 [min] | 类型   | 峰宽 [min] | 峰面积      | 峰高      | 峰面积%  |
|------------|------|----------|----------|---------|-------|
| 6.532      | MM m | 1.03     | 26507.74 | 2234.98 | 50.43 |
| 7.737      | MM m | 1.13     | 26054.62 | 2177.64 | 49.57 |
| 总和         |      |          | 52562.35 |         |       |

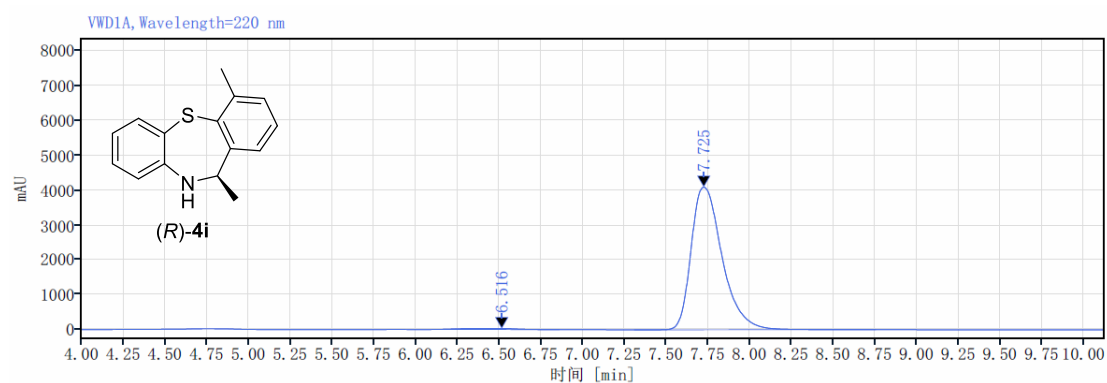

信号: VWD1A, Wavelength=220 nm

| 保留时间 [min] | 类型   | 峰宽 [min] | 峰面积      | 峰高      | 峰面积%  |
|------------|------|----------|----------|---------|-------|
| 6.516      | MM m | 0.73     | 546.81   | 24.88   | 1.03  |
| 7.725      | MM m | 1.44     | 52777.68 | 4094.50 | 98.97 |
| 总和         |      |          | 53324.49 |         |       |



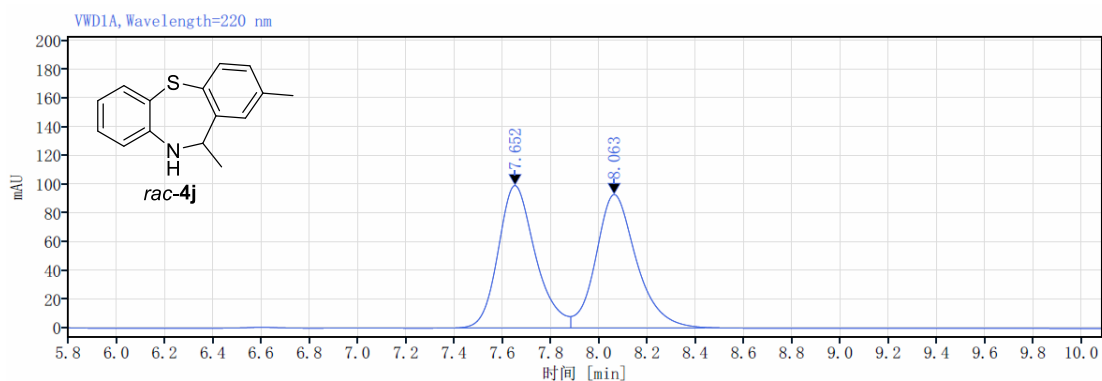

信号: VWD1A, Wavelength=220 nm

| 保留时间 [min] | 类型   | 峰宽 [min] | 峰面积     | 峰高    | 峰面积%  |
|------------|------|----------|---------|-------|-------|
| 7.652      | MM m | 0.54     | 1062.70 | 99.07 | 49.49 |
| 8.063      | MM m | 0.61     | 1084.51 | 92.75 | 50.51 |
| 总和         |      |          | 2147.21 |       |       |

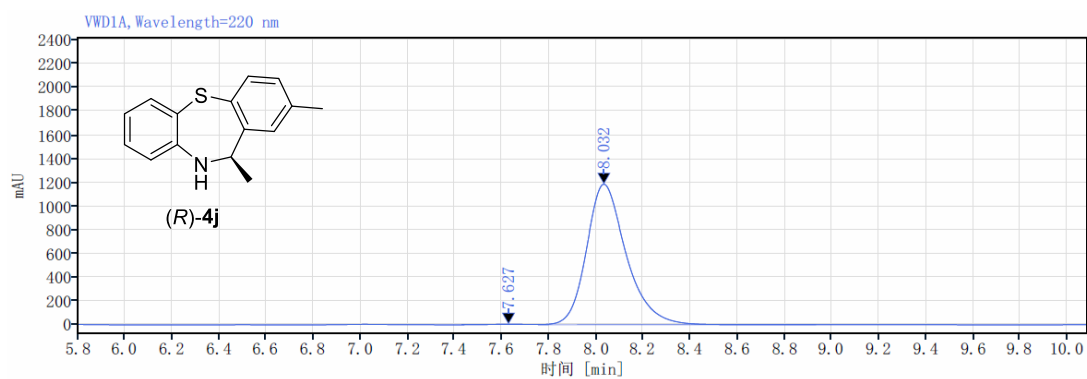

信号: VWD1A, Wavelength=220 nm

| 保留时间 [min] | 类型   | 峰宽 [min] | 峰面积      | 峰高      | 峰面积%  |
|------------|------|----------|----------|---------|-------|
| 7.627      | MM m | 0.32     | 55.03    | 5.66    | 0.39  |
| 8.032      | MM m | 1.18     | 13916.96 | 1187.39 | 99.61 |
| 总和         |      |          | 13971.99 |         |       |

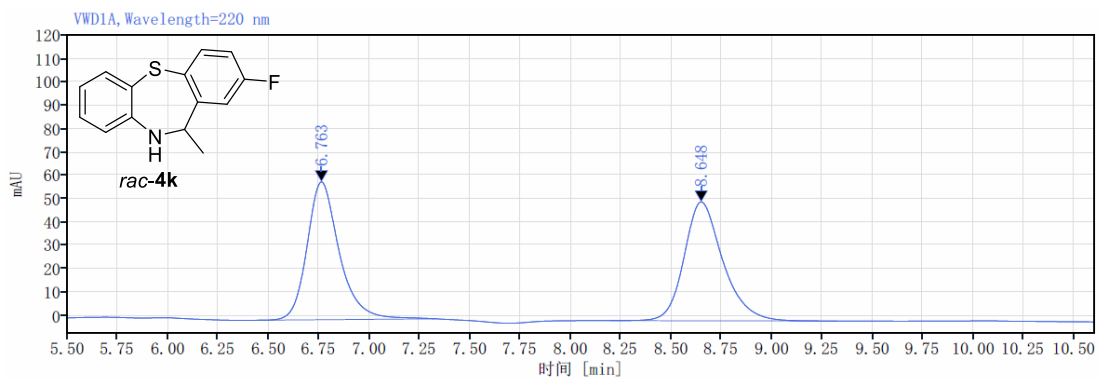

信号: VWD1A, Wavelength=220 nm

| 保留时间 [min] | 类型   | 峰宽 [min] | 峰面积     | 峰高    | 峰面积%  |
|------------|------|----------|---------|-------|-------|
| 6.763      | MM m | 0.96     | 659.93  | 59.15 | 49.13 |
| 8.648      | MM m | 1.12     | 683.23  | 50.99 | 50.87 |
| 总和         |      |          | 1343.16 |       |       |

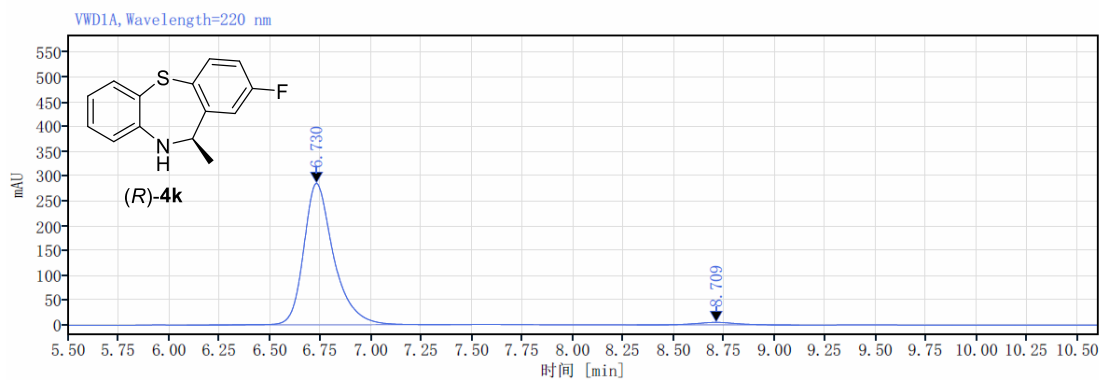

信号: VWD1A, Wavelength=220 nm

| 保留时间 [min] | 类型   | 峰宽 [min] | 峰面积     | 峰高     | 峰面积%  |
|------------|------|----------|---------|--------|-------|
| 6.730      | MM m | 1.30     | 2947.21 | 285.28 | 97.44 |
| 8.709      | MM m | 0.80     | 77.49   | 5.30   | 2.56  |
| 总和         |      |          | 3024.70 |        |       |

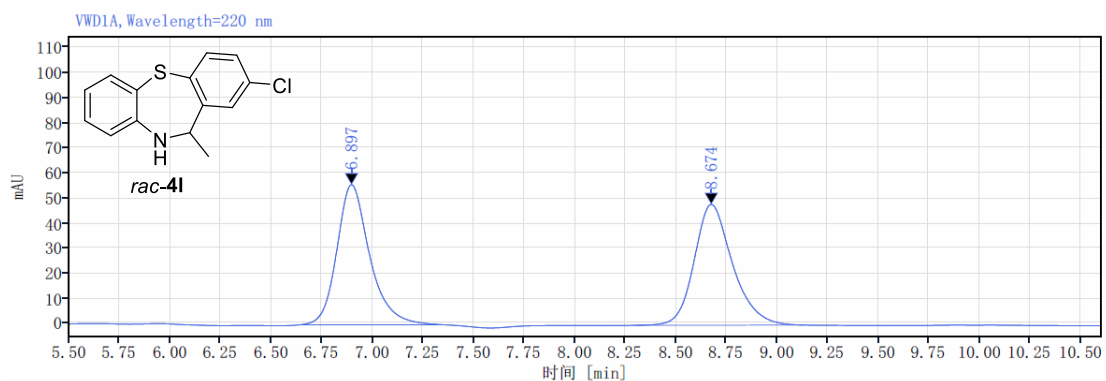

信号: VWD1A, Wavelength=220 nm

| 保留时间 [min] | 类型   | 峰宽 [min] | 峰面积     | 峰高    | 峰面积%  |
|------------|------|----------|---------|-------|-------|
| 6.897      | MM m | 0.67     | 625.58  | 55.68 | 49.68 |
| 8.674      | MM m | 0.83     | 633.53  | 48.13 | 50.32 |
| 总和         |      |          | 1259.10 |       |       |

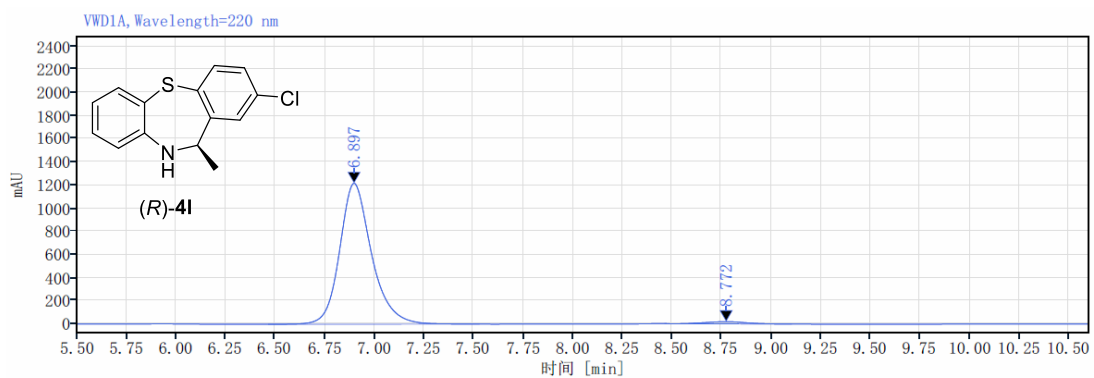

信号: VWD1A, Wavelength=220 nm

| 保留时间 [min] | 类型   | 峰宽 [min] | 峰面积      | 峰高      | 峰面积%  |
|------------|------|----------|----------|---------|-------|
| 6.897      | MM m | 1.07     | 13633.63 | 1216.81 | 98.04 |
| 8.772      | MM m | 0.64     | 272.32   | 19.29   | 1.96  |
| 总和         |      |          | 13905.95 |         |       |

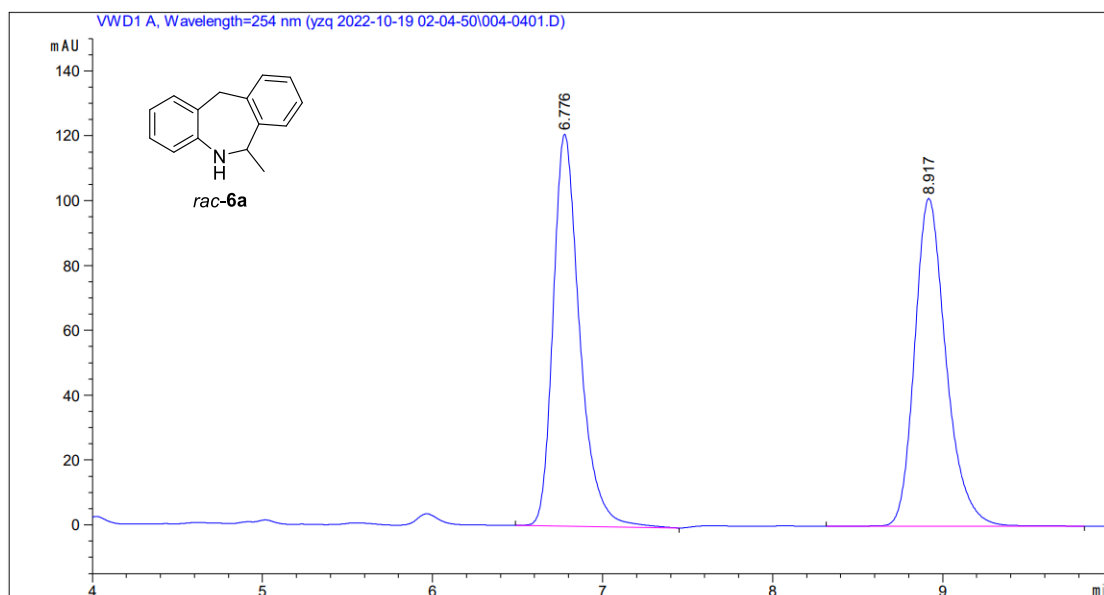

| 峰 # | 保留时间 [min] | 类型 | 峰宽 [min] | 峰面积 [mAU*s] | 峰高 [mAU]  | 峰面积 %   |
|-----|------------|----|----------|-------------|-----------|---------|
| 1   | 6.776      | BB | 0.1647   | 1312.09070  | 120.80309 | 50.2006 |
| 2   | 8.917      | BB | 0.1952   | 1301.60254  | 101.07877 | 49.7994 |

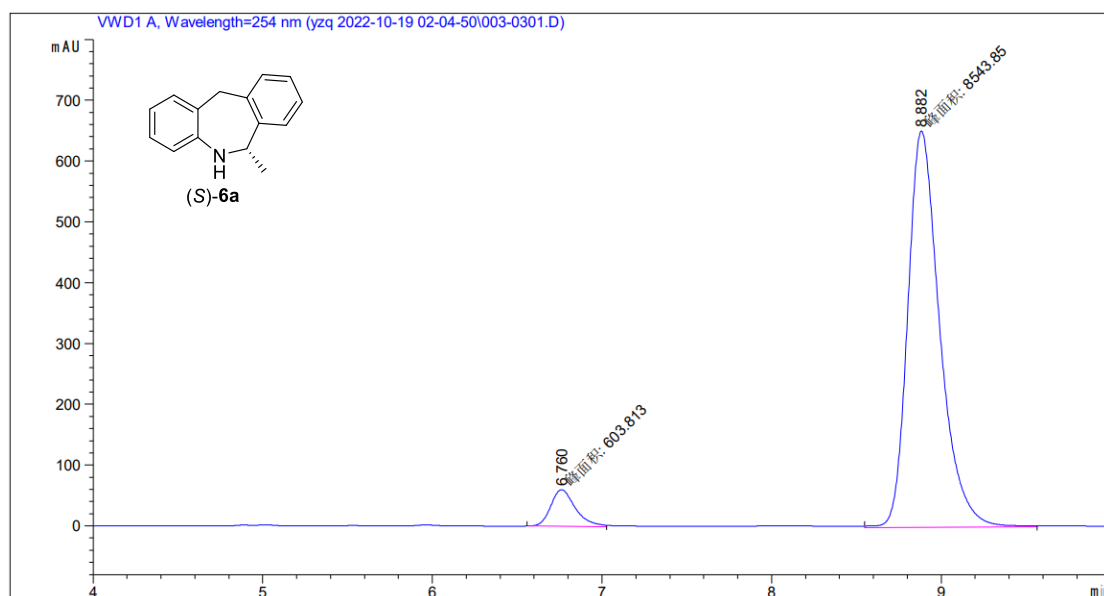

| 峰 # | 保留时间 [min] | 类型 | 峰宽 [min] | 峰面积 [mAU*s] | 峰高 [mAU]  | 峰面积 %   |
|-----|------------|----|----------|-------------|-----------|---------|
| 1   | 6.760      | MM | 0.1678   | 603.81342   | 59.95949  | 6.6007  |
| 2   | 8.882      | MM | 0.2185   | 8543.84766  | 651.67072 | 93.3993 |

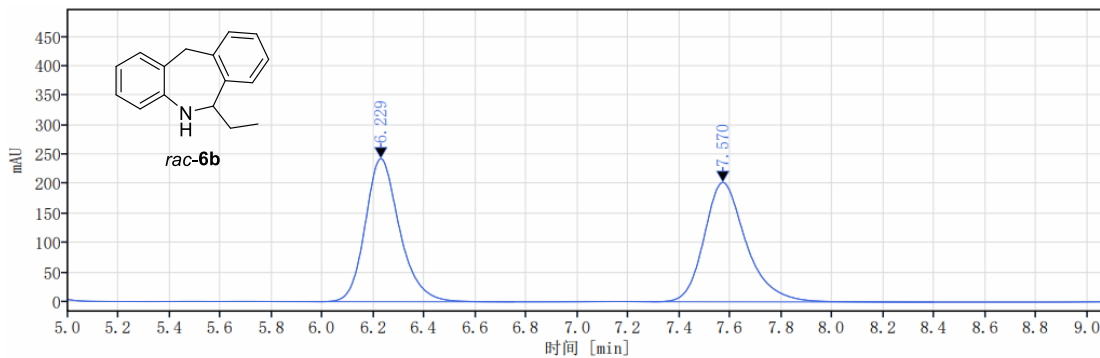

信号: VWD1A, Wavelength=220 nm

| 保留时间 [min] | 类型   | 峰宽 [min] | 峰面积     | 峰高     | 峰面积%  |
|------------|------|----------|---------|--------|-------|
| 6.229      | MM m | 0.78     | 2270.95 | 242.56 | 49.46 |
| 7.570      | MM m | 1.11     | 2320.49 | 202.48 | 50.54 |
| 总和         |      |          | 4591.43 |        |       |

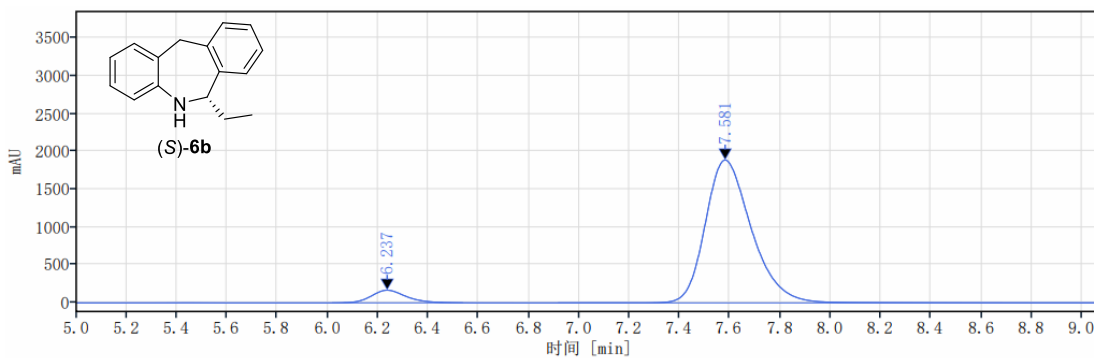

信号: VWD1A, Wavelength=220 nm

| 保留时间 [min] | 类型   | 峰宽 [min] | 峰面积      | 峰高      | 峰面积%  |
|------------|------|----------|----------|---------|-------|
| 6.237      | MM m | 0.52     | 1600.81  | 167.31  | 6.21  |
| 7.581      | MM m | 2.51     | 24190.00 | 1891.09 | 93.79 |
| 总和         |      |          | 25790.81 |         |       |

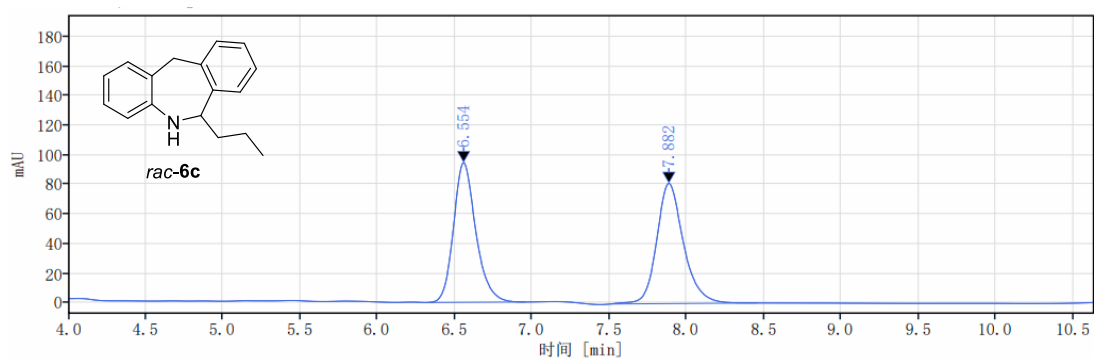

信号: VWD1A, Wavelength=220 nm

| 保留时间 [min] | 类型   | 峰宽 [min] | 峰面积     | 峰高    | 峰面积%  |
|------------|------|----------|---------|-------|-------|
| 6.554      | BB   | 0.64     | 946.60  | 94.36 | 49.19 |
| 7.882      | MM m | 0.95     | 977.67  | 81.23 | 50.81 |
| 总和         |      |          | 1924.27 |       |       |

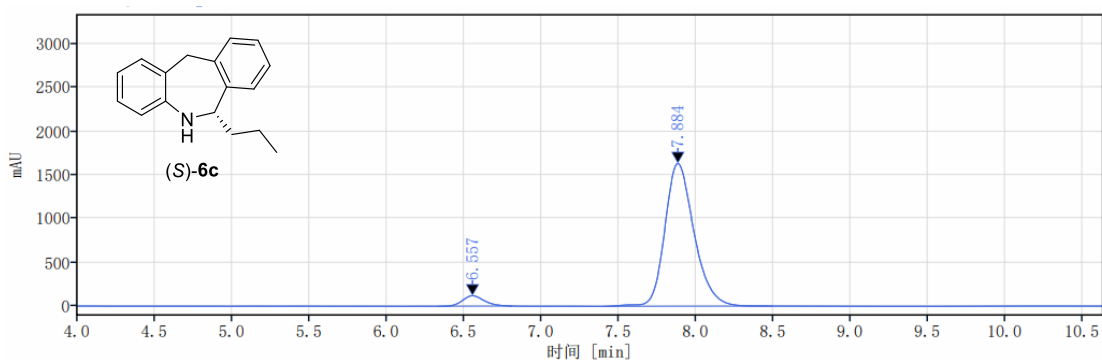

信号: VWD1A, Wavelength=220 nm

| 保留时间 [min] | 类型   | 峰宽 [min] | 峰面积      | 峰高      | 峰面积%  |
|------------|------|----------|----------|---------|-------|
| 6.557      | MM m | 0.48     | 1167.79  | 119.44  | 5.16  |
| 7.884      | MM m | 1.09     | 21443.56 | 1635.35 | 94.84 |
| 总和         |      |          | 22611.35 |         |       |

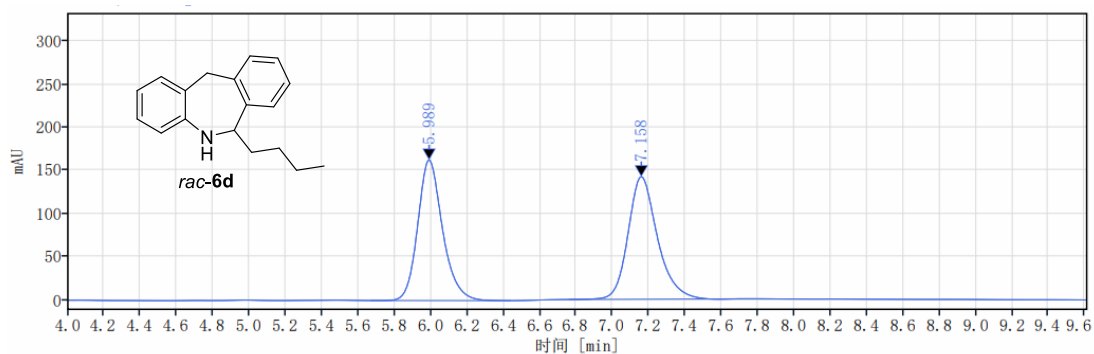

信号: VWD1A, Wavelength=220 nm

| 保留时间 [min] | 类型   | 峰宽 [min] | 峰面积     | 峰高     | 峰面积%  |
|------------|------|----------|---------|--------|-------|
| 5.989      | MM m | 0.77     | 1551.51 | 163.24 | 49.33 |
| 7.158      | MM m | 0.95     | 1593.52 | 142.19 | 50.67 |
| 总和         |      |          | 3145.04 |        |       |

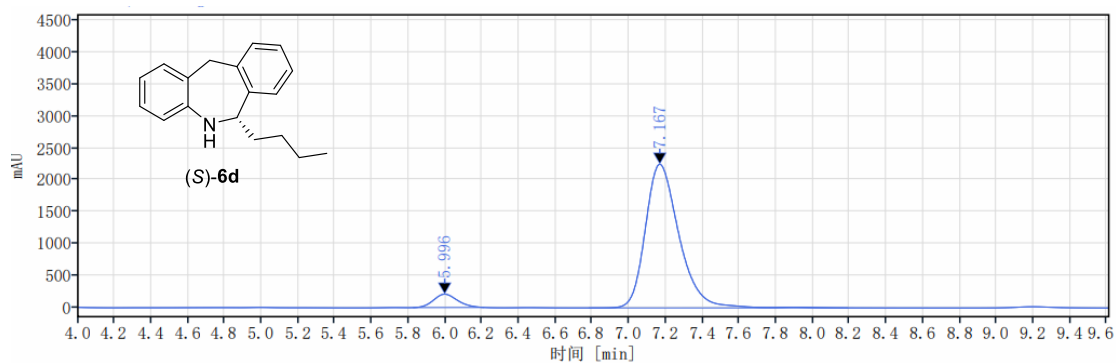

信号: VWD1A, Wavelength=220 nm

| 保留时间 [min] | 类型   | 峰宽 [min] | 峰面积      | 峰高      | 峰面积%  |
|------------|------|----------|----------|---------|-------|
| 5.996      | MM m | 0.39     | 1903.51  | 209.31  | 6.22  |
| 7.167      | MM m | 1.41     | 28676.92 | 2247.64 | 93.78 |
| 总和         |      |          | 30580.43 |         |       |

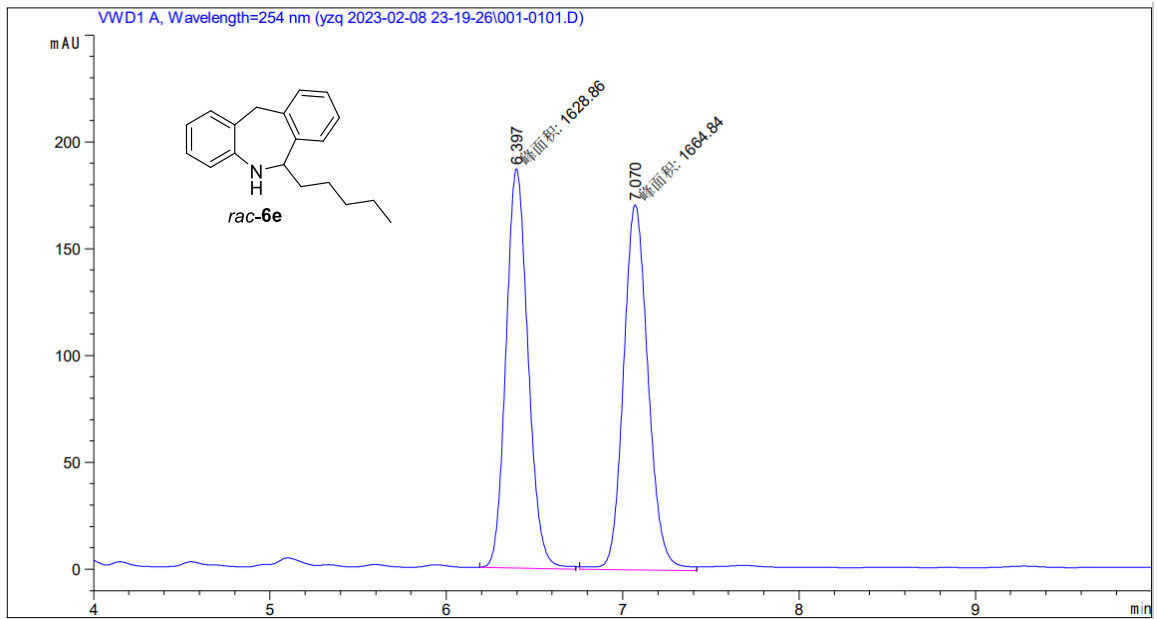

| 峰 # | 保留时间 [min] | 类型 | 峰宽 [min] | 峰面积 [mAU*s] | 峰高 [mAU]  | 峰面积 %   |
|-----|------------|----|----------|-------------|-----------|---------|
| 1   | 6.397      | MM | 0.1453   | 1628.86328  | 186.80881 | 49.4538 |
| 2   | 7.070      | MM | 0.1623   | 1664.84094  | 170.94958 | 50.5462 |

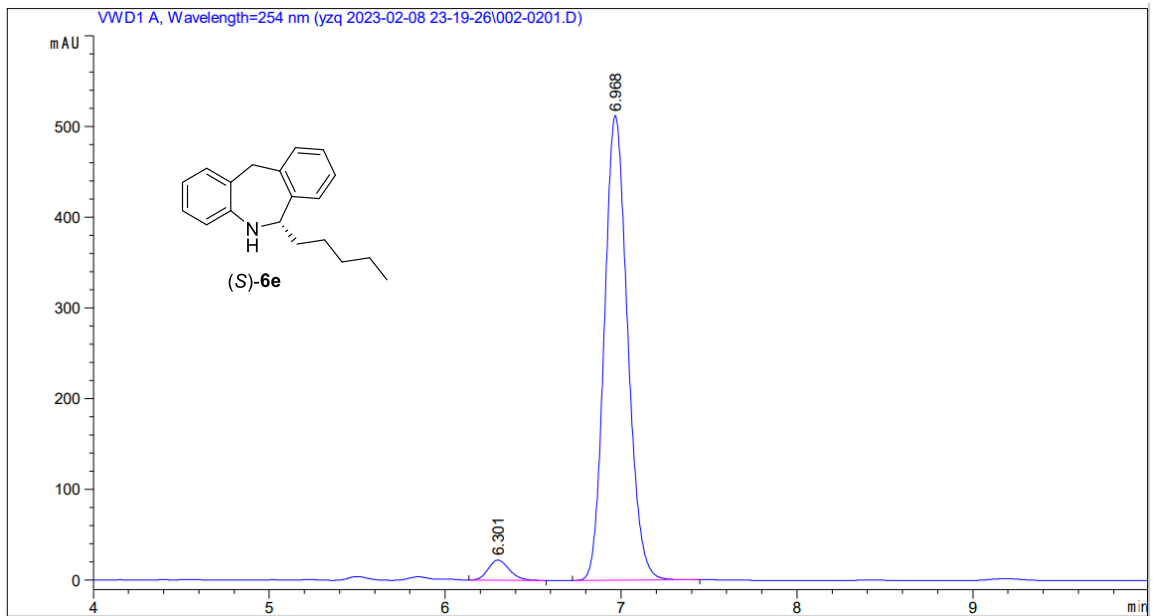

| 峰 # | 保留时间 [min] | 类型 | 峰宽 [min] | 峰面积 [mAU*s] | 峰高 [mAU]  | 峰面积 %   |
|-----|------------|----|----------|-------------|-----------|---------|
| 1   | 6.301      | BB | 0.1279   | 184.13351   | 22.16995  | 3.7789  |
| 2   | 6.968      | BB | 0.1418   | 4688.52637  | 511.98151 | 96.2211 |



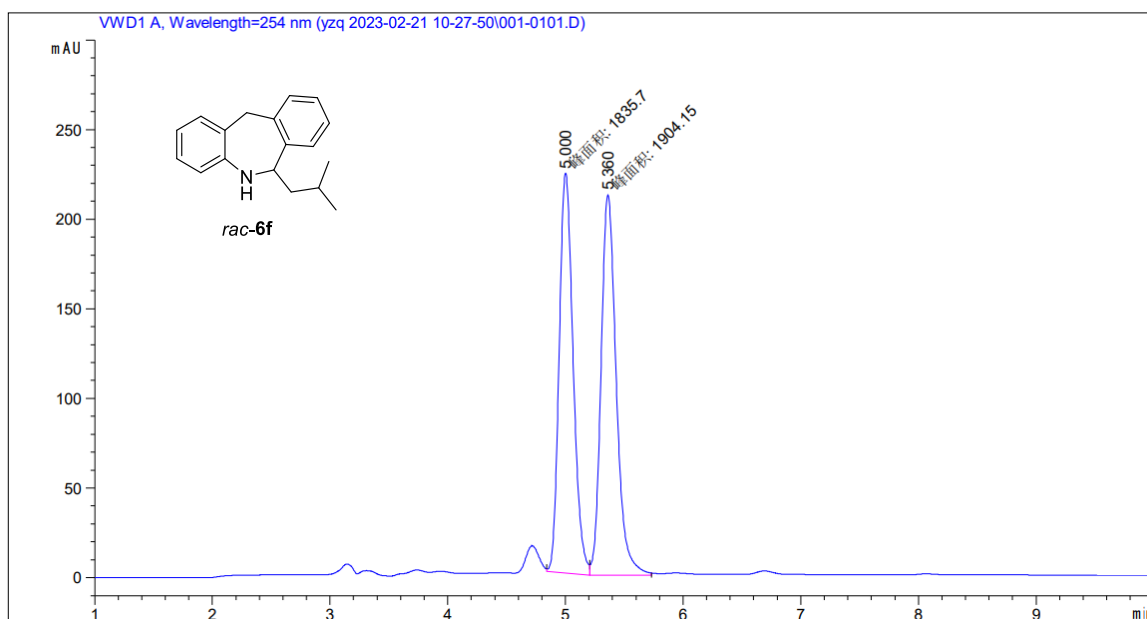

| 峰 # | 保留时间 [min] | 类型 | 峰宽 [min] | 峰面积 [mAU*s] | 峰高 [mAU]  | 峰面积 %   |
|-----|------------|----|----------|-------------|-----------|---------|
| 1   | 5.000      | MM | 0.1371   | 1835.70276  | 223.13763 | 49.0849 |
| 2   | 5.360      | MM | 0.1495   | 1904.15332  | 212.34982 | 50.9151 |

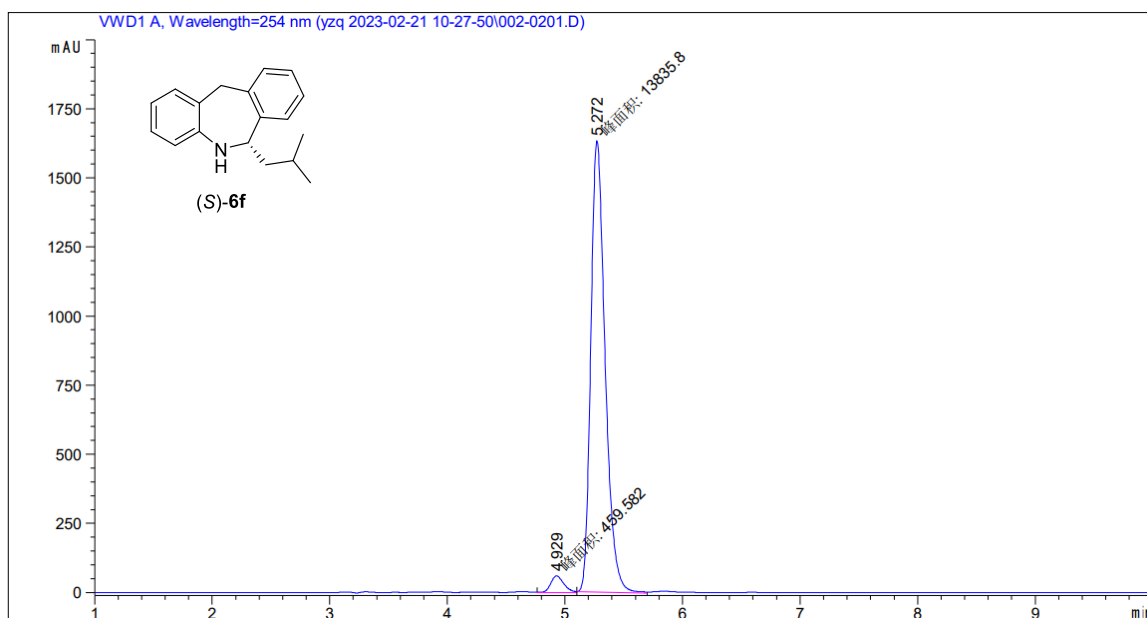

| 峰 # | 保留时间 [min] | 类型 | 峰宽 [min] | 峰面积 [mAU*s] | 峰高 [mAU]   | 峰面积 %   |
|-----|------------|----|----------|-------------|------------|---------|
| 1   | 4.929      | MM | 0.1278   | 459.58212   | 59.93166   | 3.2149  |
| 2   | 5.272      | MM | 0.1412   | 1.38358e4   | 1633.07397 | 96.7851 |

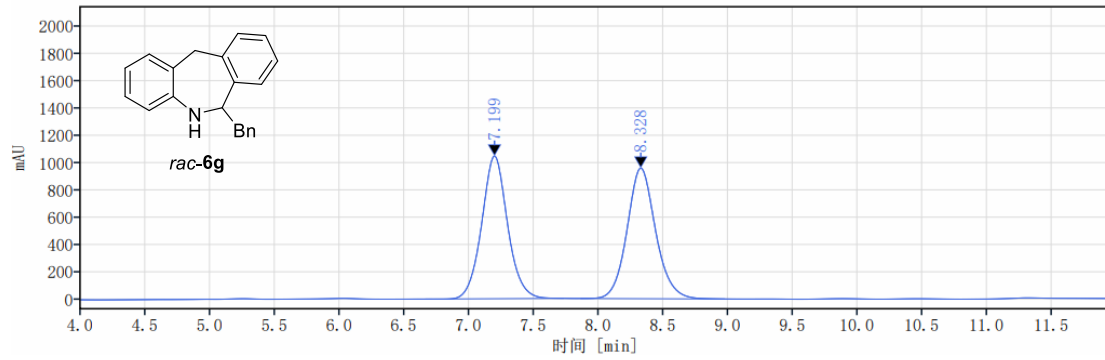

信号: VWD1A, Wavelength=220 nm

| 保留时间 [min] | 类型   | 峰宽 [min] | 峰面积      | 峰高      | 峰面积%  |
|------------|------|----------|----------|---------|-------|
| 7.199      | MM m | 1.07     | 14528.85 | 1046.43 | 49.77 |
| 8.328      | MM m | 1.12     | 14664.29 | 957.81  | 50.23 |
| 总和         |      |          | 29193.14 |         |       |

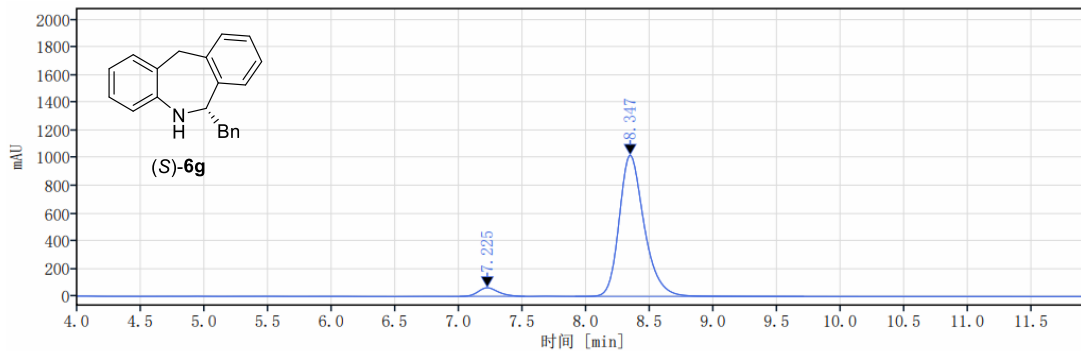

信号: VWD1A, Wavelength=220 nm

| 保留时间 [min] | 类型   | 峰宽 [min] | 峰面积      | 峰高      | 峰面积%  |
|------------|------|----------|----------|---------|-------|
| 7.225      | MM m | 0.51     | 689.75   | 62.38   | 4.72  |
| 8.347      | MM m | 1.80     | 13930.67 | 1021.18 | 95.28 |
| 总和         |      |          | 14620.42 |         |       |

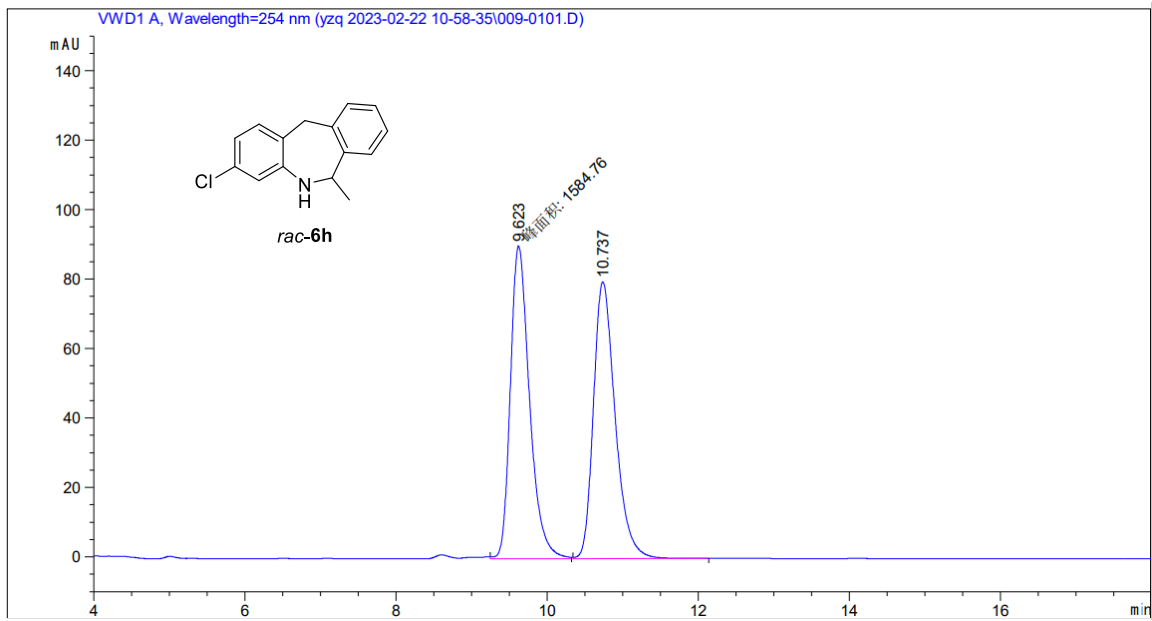

| 峰 # | 保留时间 [min] | 类型 | 峰宽 [min] | 峰面积 [mAU*s] | 峰高 [mAU] | 峰面积 %   |
|-----|------------|----|----------|-------------|----------|---------|
| 1   | 9.623      | MM | 0.2936   | 1584.75745  | 89.95203 | 49.9335 |
| 2   | 10.737     | VB | 0.3056   | 1588.97620  | 79.70918 | 50.0665 |

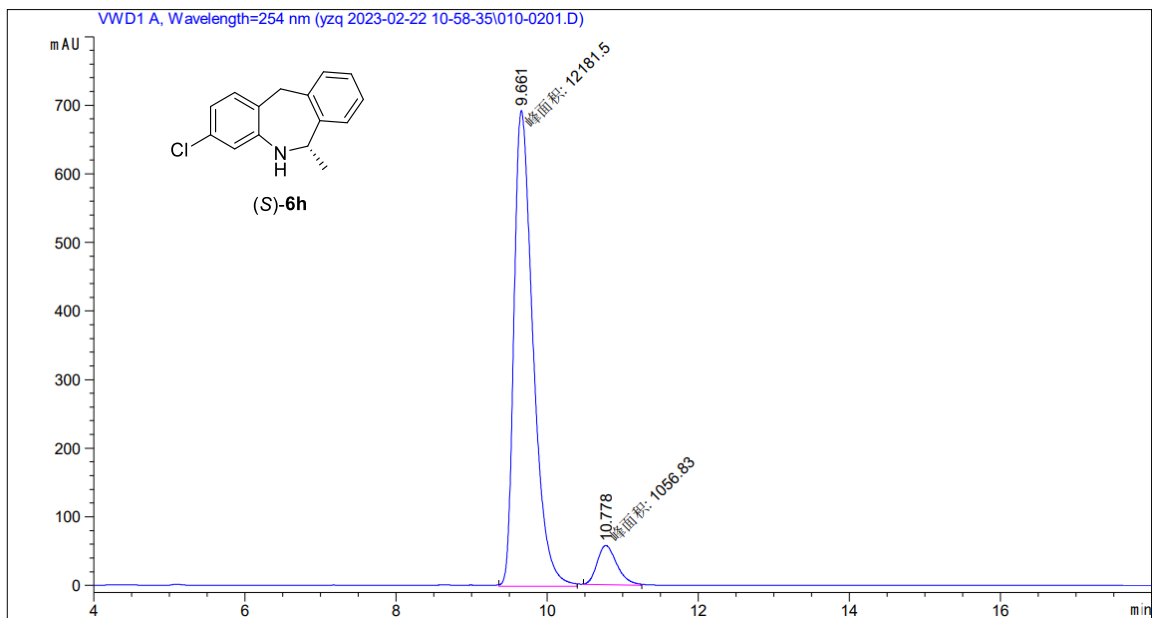

| 峰 # | 保留时间 [min] | 类型 | 峰宽 [min] | 峰面积 [mAU*s] | 峰高 [mAU]  | 峰面积 %   |
|-----|------------|----|----------|-------------|-----------|---------|
| 1   | 9.661      | MM | 0.2926   | 1.21815e4   | 693.95624 | 92.0169 |
| 2   | 10.778     | MM | 0.3065   | 1056.82703  | 57.46886  | 7.9831  |

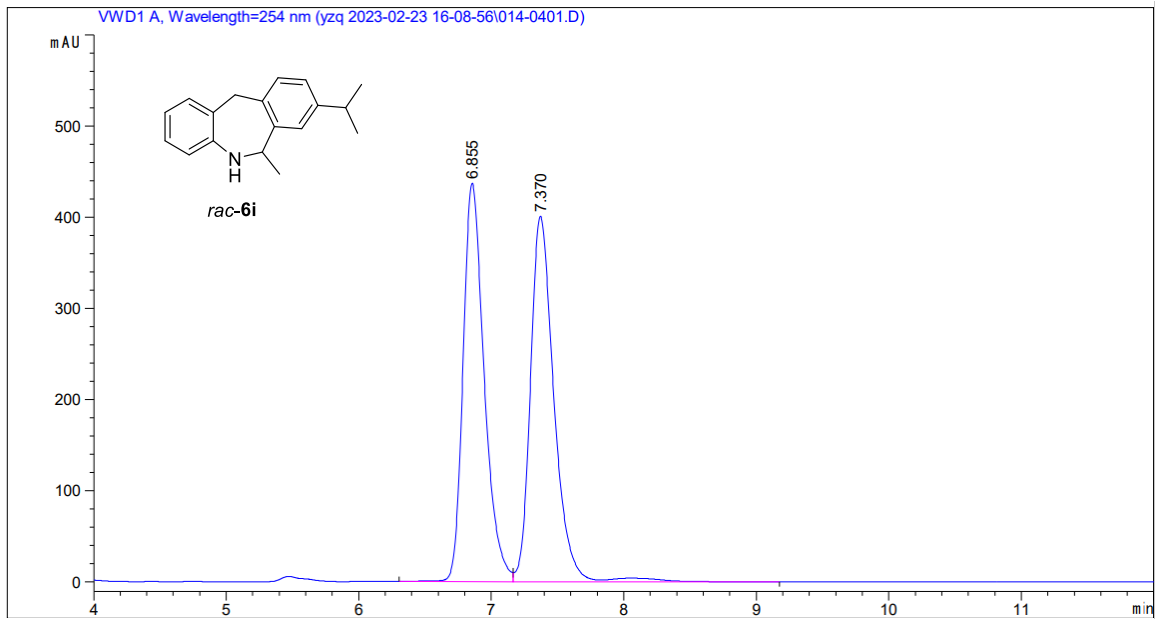

| 峰 # | 保留时间 [min] | 类型   | 峰宽 [min] | 峰面积 [mAU*s] | 峰高 [mAU]  | 峰面积 %   |
|-----|------------|------|----------|-------------|-----------|---------|
| 1   | 6.855      | BV   | 0.1683   | 4839.42090  | 436.70612 | 49.3037 |
| 2   | 7.370      | VV R | 0.1857   | 4976.10547  | 400.64288 | 50.6963 |

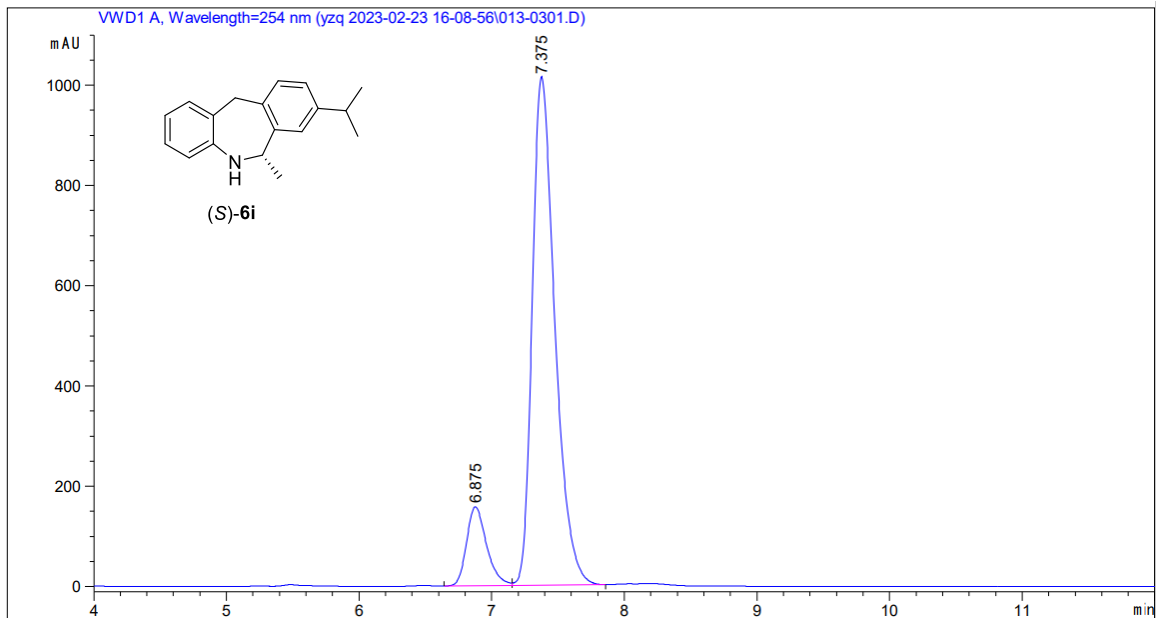

| 峰 # | 保留时间 [min] | 类型 | 峰宽 [min] | 峰面积 [mAU*s] | 峰高 [mAU]   | 峰面积 %   |
|-----|------------|----|----------|-------------|------------|---------|
| 1   | 6.875      | BV | 0.1596   | 1655.15869  | 157.55090  | 12.1165 |
| 2   | 7.375      | VB | 0.1801   | 1.20052e4   | 1014.30573 | 87.8835 |
